# Supplementary material for: Maturation of cortical input to dorsal raphe nucleus increases behavioral persistence in mice
Source: eLife. 2024 Mar 13;13:e93485. doi: 10.7554/eLife.93485 (PMC10994666; doi:10.7554/eLife.93485)
Supplement: Figure 1—figure supplement 1—source data 1. [file elife-93485-fig1-figsupp1-data1.xlsx]

## Sheet: Fig S1A
Input Resistance (Mohm)
3-4 weeks	5-6 weeks	7-8 weeks	5-6 months
194.941	697.944	224.669	763.942
720.259	925.772	943.396	741.29
478.631	376.865	243.962	470.588
850.912	402.181	924.214	443.853
370.734	661.713	256.805	359.066
247.152	486.855	943.396	385.06
241.022	324.781	1515.15	755.858
714.276	297.619	287.274	999.001
362.67	874.891	727.802	630.12
880.282	996.016	980.392	664.28
444.423	564.016	197.472	187.617
417.002	99.0491	1230.01	578.035
563.606	1039.5	728.863	507.099
405.857	975.61	703.73	516.796
1172.86	487.805	595.948	208.681
377.117	260.281	1501.5	640.205
408.405	268.456	1061.57	599.161
321.215	427.168	1129.94	322.269
357.818	560.538	780.031	531.915
379.367	981.354	1116.07
410.813	853.242	632.511
353.282	1127.4	1020.41
335.858	1398.6	979.432
434.426	668.896	201.735
497.183		1121.08
755.184		787.402
676.366		291.121
286.868		1203.37
		1117.32
		1043.52
		1149.42
		338.181
		734.214
		752.445
		574.713
		694.927
		519.75
		1584.79
		327.547
		1336.9
		243.25
		293.255
		984.252
		483.092
		294.598
		382.506
		172.673
		348.022
		740.428
		214.656

## Sheet: Fig S1B
Input Capacitance (pF)						Input Capacitance (pF)
3-4 weeks	5-6 weeks	7-8 weeks	5-6 months			3-4 weeks	5-6 weeks	7-8 weeks	5-6 months
18.7516	23.8261	13.1144	45.7884		>20	15	15	27	12
8.16268	11.5556	17.8922	67.8393		<20	13	9	23	8
16.8225	14.5851	38.4255	44.6996
15.665	24.3742	13.9232	13.7573
23.1525	28.5763	89.6497	22.9353
26.7498	29.9733	56.1795	19.1218
18.5638	27.8867	26.2694	15.8105
22.264	15.9115	8.90679	24.5639
5.83851	15.4566	42.5076	16.1544
20.7575	24.8813	12.2917	12.8277
27.1277	30.2823	23.1456	53.7711
25.9525	29.9774	28.2969	13.2219
13.9111	22.629	10.955	23.4987
17.4554	20.4122	20.2088	32.7678
12.6165	4.56917	12.8347	64.3215
26.6047	22.9728	14.0031	12.6954
23.578	20.8823	14.2271	36.8712
42.9781	24.635	14.5365	28.8122
18.4476	26.5415	16.6814	14.0732
58.2321	15.933	16.6443
13.0366	13.9827	34.0272
20.8929	19.3783	20.88
24.1282	24.0739	55.3676
10.847	16.3559	54.7687
61.9066		32.3979
44.0975		31.1404
18.4365		20.5092
82.78		19.8428
		41.0443
		23.6971
		19.1182
		33.059
		35.6274
		20.4886
		12.9814
		50.296
		37.4695
		17.5424
		22.5873
		18.014
		40.0226
		43.0404
		10.0205
		19.0181
		28.4963
		19.4325
		18.3663
		18.8128
		11.4678
		21.026

## Sheet: Fig S1C
Density of tdTomato+ somas per bin
3-4 weeks	7-8 weeks
4.5918	6.06
6.1842	4.87
4.7966	5.57
	4.3508

## Sheet: Fig S1D
	3-4 weeks							7-8 weeks
	Neurons							Neurons
mW	1	2	3	4	5	6		1	2	3	4	5	6	7
1	776.867	796.577	732.98	524.844	448.349	492.55		524.284	410.349	625.285	769.846	561.165	711.181	574.998
4	910.793	928.164	842.376	582.274	519.94	609.428		604.221	536.766	717.743	868.726	680.152	835.761	710.24
16	1027.07	1064.77	981.84	660.044	567.19	654.487		629.596	656.227	813.232	935.137	769.575	941.325	844.081
40	1122.35	1142.27	1073.23	763.049	598.564	682.999		799.714	723.346	855.448	1000.47	809.706	965.205	898.367
70	1163.79	1175.91	1107.32	883.985	655.297	719.986		852.37	736.89	868.884	1066.74	824.794	990.741	966.923
