# Supplementary material for: Maturation of cortical input to dorsal raphe nucleus increases behavioral persistence in mice
Source: eLife. 2024 Mar 13;13:e93485. doi: 10.7554/eLife.93485 (PMC10994666; doi:10.7554/eLife.93485)
Supplement: Figure 1—source data 1. [file elife-93485-fig1-data1.xlsx]

## Sheet: Fig 1B
	Optogenetically evoked amplitude (pA)
Postnalal days	Neurons recorded
21	0	0	0	0	0	0					3-4 weeks
24	0	0	0	0
29	0	0	0	0
30	0	0	0	0	0
31	0	0	0
34	0	14	0	14	0	0
39	0	0	5	6							5-6 weeks
40	0	0	15	36	19
41	0	0	21	10	7	31
45	0	40	12	103	19
50	0	28	23	62
55	131	310	0	31	0	116	96	78	0	80	7-8 weeks
57	73	33	0	62	30	73	0	82	247	130
59	0	450	270	159	125	0	72	40	49	234
61	174	56	82	14	373
62	0	116	169	78	0	111	264
64	15	70	131	45	137	18	185	258
160	40	53	112	130	0	90	174	165	0	0	5-6 months
180	0	101	84	63	131	250	116	192	55	54

## Sheet: Fig 1C
	Connection probability						Mean Amplitude (pA)
	3-4 weeks	5-6 weeks	7-8 weeks	5-6 months			3-4 weeks	5-6 weeks	7-8 weeks	5-6 months
Connected	2	16	41	16			14	5	131	40
Not Connected	26	8	9	4			14	6	310	53
								15	31	112
								36	116	130
								19	96	90
								21	78	174
								10	80	165
								7	73	101
								31	33	84
								40	62	63
								12	30	131
								103	73	250
								19	82	116
								28	247	192
								23	130	55
								62	450	54
									270
									159
									125
									72
									40
									49
									234
									174
									56
									82
									14
									373
									116
									169
									78
									111
									264
									15
									70
									131
									45
									137
									18
									185
									258

## Sheet: Fig 1E
Axon intersections per bin
NAcb	NAcb	DRN	DRN
3-4 weeks	7-8 weeks	3-4 weeks	7-8 weeks
3.49259	3.91531	2.67407	3.41852
5.38519	4.41852	0.792593	6.57963
4.56333	5.02167	2.75714	5.90953
	9.0667	2.608	4.84571
	5.1667		5.56923
	8.1375		5.3038
	5.02		8.2667

## Sheet: Fig 1F
	Connection probability			Mean Amplitude (pA)
	3-4 weeks	5-6 weeks		3-4 weeks	7-8 weeks
Connected	10	7		514	166
Not Connected	1	1		774	200
				173	185
				817	498
				83	312
				106	374
				126	455
				250
				195
				262
