# Supplementary material for: Maturation of cortical input to dorsal raphe nucleus increases behavioral persistence in mice
Source: eLife. 2024 Mar 13;13:e93485. doi: 10.7554/eLife.93485 (PMC10994666; doi:10.7554/eLife.93485)
Supplement: Figure 2—figure supplement 1—source data 1. [file elife-93485-fig2-figsupp1-data1.xlsx]

## Sheet: Fig S3A
MouseID	Age	LeavingTime	KernelDensity	Mean	Age	LeavingTime	KernelDensity		MouseID	Virus	LeavingTime	KernelDensity	Mean	Virus	LeavingTime	KernelDensity
RJ01	Juveniles	-1.31828	2.28173e-05		Adults	-1.44059	1.90217e-06		CD02	tdTomato	-2.03846	3.43153e-05		tdTomato	-1.42055	4.27658e-06
RJ01	Juveniles	-1.31604	2.30922e-05		Adults	-1.43829	1.95435e-06		CD02	tdTomato	-2.03561	3.3917e-05		tdTomato	-1.41814	4.36493e-06
RJ01	Juveniles	-1.3138	2.33974e-05		Adults	-1.43599	2.01703e-06		CD02	tdTomato	-2.03275	3.35534e-05		tdTomato	-1.41573	4.46899e-06
RJ01	Juveniles	-1.31156	2.37333e-05		Adults	-1.43369	2.09052e-06		CD02	tdTomato	-2.02989	3.32241e-05		tdTomato	-1.41332	4.58911e-06
RJ01	Juveniles	-1.30932	2.41002e-05		Adults	-1.43138	2.17518e-06		CD02	tdTomato	-2.02703	3.29287e-05		tdTomato	-1.41091	4.72569e-06
RJ01	Juveniles	-1.30708	2.44986e-05		Adults	-1.42908	2.2714e-06		CD02	tdTomato	-2.02418	3.26669e-05		tdTomato	-1.4085	4.87914e-06
RJ01	Juveniles	-1.30484	2.49288e-05		Adults	-1.42678	2.37963e-06		CD02	tdTomato	-2.02132	3.24385e-05		tdTomato	-1.40609	5.04995e-06
RJ01	Juveniles	-1.30259	2.53914e-05		Adults	-1.42448	2.50036e-06		CD02	tdTomato	-2.01846	3.22432e-05		tdTomato	-1.40368	5.23863e-06
RJ01	Juveniles	-1.30035	2.58869e-05		Adults	-1.42217	2.63414e-06		CD02	tdTomato	-2.0156	3.20807e-05		tdTomato	-1.40128	5.44575e-06
RJ01	Juveniles	-1.29811	2.64158e-05		Adults	-1.41987	2.78156e-06		CD02	tdTomato	-2.01275	3.19508e-05		tdTomato	-1.39887	5.67193e-06
RJ01	Juveniles	-1.29587	2.69787e-05		Adults	-1.41757	2.94327e-06		CD02	tdTomato	-2.00989	3.18533e-05		tdTomato	-1.39646	5.91782e-06
RJ01	Juveniles	-1.29363	2.75762e-05		Adults	-1.41527	3.11997e-06		CD02	tdTomato	-2.00703	3.17881e-05		tdTomato	-1.39405	6.18415e-06
RJ01	Juveniles	-1.29139	2.82089e-05		Adults	-1.41297	3.31241e-06		CD02	tdTomato	-2.00417	3.1755e-05		tdTomato	-1.39164	6.47169e-06
RJ01	Juveniles	-1.28915	2.88775e-05		Adults	-1.41066	3.52142e-06		CD02	tdTomato	-2.00132	3.17538e-05		tdTomato	-1.38923	6.78124e-06
RJ01	Juveniles	-1.28691	2.95828e-05		Adults	-1.40836	3.74786e-06		CD02	tdTomato	-1.99846	3.17846e-05		tdTomato	-1.38682	7.11369e-06
RJ01	Juveniles	-1.28467	3.03253e-05		Adults	-1.40606	3.99268e-06		CD02	tdTomato	-1.9956	3.18472e-05		tdTomato	-1.38441	7.46997e-06
RJ01	Juveniles	-1.28242	3.1106e-05		Adults	-1.40376	4.2569e-06		CD02	tdTomato	-1.99274	3.19415e-05		tdTomato	-1.382	7.85106e-06
RJ01	Juveniles	-1.28018	3.19256e-05		Adults	-1.40145	4.54158e-06		CD02	tdTomato	-1.98989	3.20676e-05		tdTomato	-1.37959	8.25803e-06
RJ01	Juveniles	-1.27794	3.2785e-05		Adults	-1.39915	4.84787e-06		CD02	tdTomato	-1.98703	3.22255e-05		tdTomato	-1.37718	8.69197e-06
RJ01	Juveniles	-1.2757	3.3685e-05		Adults	-1.39685	5.177e-06		CD02	tdTomato	-1.98417	3.24151e-05		tdTomato	-1.37477	9.15407e-06
RJ01	Juveniles	-1.27346	3.46266e-05		Adults	-1.39455	5.53027e-06		CD02	tdTomato	-1.98131	3.26365e-05		tdTomato	-1.37236	9.64557e-06
RJ01	Juveniles	-1.27122	3.56107e-05		Adults	-1.39224	5.90906e-06		CD02	tdTomato	-1.97846	3.28899e-05		tdTomato	-1.36995	1.01678e-05
RJ01	Juveniles	-1.26898	3.66384e-05		Adults	-1.38994	6.31484e-06		CD02	tdTomato	-1.9756	3.31752e-05		tdTomato	-1.36755	1.07221e-05
RJ01	Juveniles	-1.26674	3.77107e-05		Adults	-1.38764	6.74916e-06		CD02	tdTomato	-1.97274	3.34926e-05		tdTomato	-1.36514	1.13099e-05
RJ01	Juveniles	-1.2645	3.88286e-05		Adults	-1.38534	7.21368e-06		CD02	tdTomato	-1.96988	3.38422e-05		tdTomato	-1.36273	1.19328e-05
RJ01	Juveniles	-1.26226	3.99932e-05		Adults	-1.38304	7.71014e-06		CD02	tdTomato	-1.96703	3.42243e-05		tdTomato	-1.36032	1.25923e-05
RJ01	Juveniles	-1.26001	4.12058e-05		Adults	-1.38073	8.24037e-06		CD02	tdTomato	-1.96417	3.46389e-05		tdTomato	-1.35791	1.32903e-05
RJ01	Juveniles	-1.25777	4.24675e-05		Adults	-1.37843	8.80634e-06		CD02	tdTomato	-1.96131	3.50864e-05		tdTomato	-1.3555	1.40283e-05
RJ01	Juveniles	-1.25553	4.37796e-05		Adults	-1.37613	9.4101e-06		CD02	tdTomato	-1.95845	3.55668e-05		tdTomato	-1.35309	1.48083e-05
RJ01	Juveniles	-1.25329	4.51433e-05		Adults	-1.37383	1.00538e-05		CD02	tdTomato	-1.9556	3.60806e-05		tdTomato	-1.35068	1.56322e-05
RJ01	Juveniles	-1.25105	4.65601e-05		Adults	-1.37152	1.07398e-05		CD02	tdTomato	-1.95274	3.66279e-05		tdTomato	-1.34827	1.65021e-05
RJ01	Juveniles	-1.24881	4.80311e-05		Adults	-1.36922	1.14704e-05		CD02	tdTomato	-1.94988	3.72091e-05		tdTomato	-1.34586	1.742e-05
RJ01	Juveniles	-1.24657	4.9558e-05		Adults	-1.36692	1.22483e-05		CD02	tdTomato	-1.94702	3.78244e-05		tdTomato	-1.34345	1.83882e-05
RJ01	Juveniles	-1.24433	5.11421e-05		Adults	-1.36462	1.3076e-05		CD02	tdTomato	-1.94417	3.84743e-05		tdTomato	-1.34104	1.9409e-05
RJ01	Juveniles	-1.24209	5.2785e-05		Adults	-1.36231	1.39564e-05		CD02	tdTomato	-1.94131	3.91591e-05		tdTomato	-1.33863	2.04848e-05
RJ01	Juveniles	-1.23984	5.44883e-05		Adults	-1.36001	1.48924e-05		CD02	tdTomato	-1.93845	3.98792e-05		tdTomato	-1.33623	2.16182e-05
RJ01	Juveniles	-1.2376	5.62535e-05		Adults	-1.35771	1.58872e-05		CD02	tdTomato	-1.93559	4.06351e-05		tdTomato	-1.33382	2.28118e-05
RJ01	Juveniles	-1.23536	5.80823e-05		Adults	-1.35541	1.6944e-05		CD02	tdTomato	-1.93274	4.1427e-05		tdTomato	-1.33141	2.40683e-05
RJ01	Juveniles	-1.23312	5.99765e-05		Adults	-1.35311	1.80663e-05		CD02	tdTomato	-1.92988	4.22556e-05		tdTomato	-1.329	2.53907e-05
RJ01	Juveniles	-1.23088	6.19378e-05		Adults	-1.3508	1.92575e-05		CD02	tdTomato	-1.92702	4.31213e-05		tdTomato	-1.32659	2.67819e-05
RJ01	Juveniles	-1.22864	6.39681e-05		Adults	-1.3485	2.05216e-05		CD02	tdTomato	-1.92416	4.40246e-05		tdTomato	-1.32418	2.8245e-05
RJ01	Juveniles	-1.2264	6.60692e-05		Adults	-1.3462	2.18625e-05		CD02	tdTomato	-1.92131	4.49661e-05		tdTomato	-1.32177	2.97833e-05
RJ01	Juveniles	-1.22416	6.8243e-05		Adults	-1.3439	2.32842e-05		CD02	tdTomato	-1.91845	4.59462e-05		tdTomato	-1.31936	3.14001e-05
RJ01	Juveniles	-1.22192	7.04916e-05		Adults	-1.34159	2.47912e-05		CD02	tdTomato	-1.91559	4.69657e-05		tdTomato	-1.31695	3.3099e-05
RJ01	Juveniles	-1.21967	7.2817e-05		Adults	-1.33929	2.63879e-05		CD02	tdTomato	-1.91273	4.80251e-05		tdTomato	-1.31454	3.48836e-05
RJ01	Juveniles	-1.21743	7.52213e-05		Adults	-1.33699	2.80791e-05		CD02	tdTomato	-1.90988	4.9125e-05		tdTomato	-1.31213	3.67578e-05
RJ01	Juveniles	-1.21519	7.77067e-05		Adults	-1.33469	2.98698e-05		CD02	tdTomato	-1.90702	5.0266e-05		tdTomato	-1.30972	3.87254e-05
RJ01	Juveniles	-1.21295	8.02754e-05		Adults	-1.33238	3.17651e-05		CD02	tdTomato	-1.90416	5.1449e-05		tdTomato	-1.30731	4.07906e-05
RJ01	Juveniles	-1.21071	8.29297e-05		Adults	-1.33008	3.37705e-05		CD02	tdTomato	-1.9013	5.26745e-05		tdTomato	-1.3049	4.29576e-05
RJ01	Juveniles	-1.20847	8.5672e-05		Adults	-1.32778	3.58916e-05		CD02	tdTomato	-1.89845	5.39433e-05		tdTomato	-1.3025	4.52309e-05
RJ01	Juveniles	-1.20623	8.85047e-05		Adults	-1.32548	3.81343e-05		CD02	tdTomato	-1.89559	5.52561e-05		tdTomato	-1.30009	4.7615e-05
RJ01	Juveniles	-1.20399	9.14303e-05		Adults	-1.32318	4.05048e-05		CD02	tdTomato	-1.89273	5.66138e-05		tdTomato	-1.29768	5.01147e-05
RJ01	Juveniles	-1.20175	9.44514e-05		Adults	-1.32087	4.30096e-05		CD02	tdTomato	-1.88987	5.80171e-05		tdTomato	-1.29527	5.27349e-05
RJ01	Juveniles	-1.19951	9.75705e-05		Adults	-1.31857	4.56552e-05		CD02	tdTomato	-1.88702	5.94669e-05		tdTomato	-1.29286	5.54808e-05
RJ01	Juveniles	-1.19726	0.00010079		Adults	-1.31627	4.84487e-05		CD02	tdTomato	-1.88416	6.0964e-05		tdTomato	-1.29045	5.83577e-05
RJ01	Juveniles	-1.19502	0.000104114		Adults	-1.31397	5.13974e-05		CD02	tdTomato	-1.8813	6.25093e-05		tdTomato	-1.28804	6.1371e-05
RJ01	Juveniles	-1.19278	0.000107544		Adults	-1.31166	5.45088e-05		CD02	tdTomato	-1.87844	6.41038e-05		tdTomato	-1.28563	6.45265e-05
RJ01	Juveniles	-1.19054	0.000111083		Adults	-1.30936	5.77907e-05		CD02	tdTomato	-1.87558	6.57482e-05		tdTomato	-1.28322	6.78301e-05
RJ01	Juveniles	-1.1883	0.000114734		Adults	-1.30706	6.12515e-05		CD02	tdTomato	-1.87273	6.74437e-05		tdTomato	-1.28081	7.12877e-05
RJ01	Juveniles	-1.18606	0.000118501		Adults	-1.30476	6.48995e-05		CD02	tdTomato	-1.86987	6.91912e-05		tdTomato	-1.2784	7.49059e-05
RJ01	Juveniles	-1.18382	0.000122386		Adults	-1.30245	6.87436e-05		CD02	tdTomato	-1.86701	7.09917e-05		tdTomato	-1.27599	7.8691e-05
RJ01	Juveniles	-1.18158	0.000126393		Adults	-1.30015	7.2793e-05		CD02	tdTomato	-1.86415	7.28463e-05		tdTomato	-1.27358	8.26498e-05
RJ01	Juveniles	-1.17934	0.000130525		Adults	-1.29785	7.70572e-05		CD02	tdTomato	-1.8613	7.4756e-05		tdTomato	-1.27118	8.67894e-05
RJ01	Juveniles	-1.17709	0.000134786		Adults	-1.29555	8.15462e-05		CD02	tdTomato	-1.85844	7.67219e-05		tdTomato	-1.26877	9.11169e-05
RJ01	Juveniles	-1.17485	0.000139179		Adults	-1.29325	8.62702e-05		CD02	tdTomato	-1.85558	7.87451e-05		tdTomato	-1.26636	9.56397e-05
RJ01	Juveniles	-1.17261	0.000143707		Adults	-1.29094	9.12397e-05		CD02	tdTomato	-1.85272	8.08269e-05		tdTomato	-1.26395	0.000100366
RJ01	Juveniles	-1.17037	0.000148374		Adults	-1.28864	9.64659e-05		CD02	tdTomato	-1.84987	8.29684e-05		tdTomato	-1.26154	0.000105303
RJ01	Juveniles	-1.16813	0.000153184		Adults	-1.28634	0.00010196		CD02	tdTomato	-1.84701	8.51708e-05		tdTomato	-1.25913	0.000110459
RJ01	Juveniles	-1.16589	0.000158141		Adults	-1.28404	0.000107734		CD02	tdTomato	-1.84415	8.74353e-05		tdTomato	-1.25672	0.000115842
RJ01	Juveniles	-1.16365	0.000163249		Adults	-1.28173	0.0001138		CD02	tdTomato	-1.84129	8.97633e-05		tdTomato	-1.25431	0.000121462
RJ01	Juveniles	-1.16141	0.000168511		Adults	-1.27943	0.000120171		CD02	tdTomato	-1.83844	9.2156e-05		tdTomato	-1.2519	0.000127328
RJ01	Juveniles	-1.15917	0.000173932		Adults	-1.27713	0.00012686		CD02	tdTomato	-1.83558	9.46148e-05		tdTomato	-1.24949	0.000133448
RJ01	Juveniles	-1.15692	0.000179516		Adults	-1.27483	0.00013388		CD02	tdTomato	-1.83272	9.7141e-05		tdTomato	-1.24708	0.000139832
RJ01	Juveniles	-1.15468	0.000185268		Adults	-1.27252	0.000141245		CD02	tdTomato	-1.82986	9.9736e-05		tdTomato	-1.24467	0.00014649
RJ01	Juveniles	-1.15244	0.000191192		Adults	-1.27022	0.00014897		CD02	tdTomato	-1.82701	0.000102401		tdTomato	-1.24226	0.000153432
RJ01	Juveniles	-1.1502	0.000197292		Adults	-1.26792	0.00015707		CD02	tdTomato	-1.82415	0.000105138		tdTomato	-1.23985	0.000160668
RJ01	Juveniles	-1.14796	0.000203573		Adults	-1.26562	0.000165559		CD02	tdTomato	-1.82129	0.000107949		tdTomato	-1.23745	0.00016821
RJ01	Juveniles	-1.14572	0.000210039		Adults	-1.26332	0.000174454		CD02	tdTomato	-1.81843	0.000110833		tdTomato	-1.23504	0.000176068
RJ01	Juveniles	-1.14348	0.000216696		Adults	-1.26101	0.000183771		CD02	tdTomato	-1.81558	0.000113795		tdTomato	-1.23263	0.000184254
RJ01	Juveniles	-1.14124	0.000223549		Adults	-1.25871	0.000193527		CD02	tdTomato	-1.81272	0.000116834		tdTomato	-1.23022	0.000192778
RJ01	Juveniles	-1.139	0.000230603		Adults	-1.25641	0.000203739		CD02	tdTomato	-1.80986	0.000119952		tdTomato	-1.22781	0.000201654
RJ01	Juveniles	-1.13676	0.000237862		Adults	-1.25411	0.000214424		CD02	tdTomato	-1.807	0.000123152		tdTomato	-1.2254	0.000210893
RJ01	Juveniles	-1.13451	0.000245333		Adults	-1.2518	0.000225601		CD02	tdTomato	-1.80415	0.000126434		tdTomato	-1.22299	0.000220508
RJ01	Juveniles	-1.13227	0.00025302		Adults	-1.2495	0.000237289		CD02	tdTomato	-1.80129	0.000129802		tdTomato	-1.22058	0.000230512
RJ01	Juveniles	-1.13003	0.000260929		Adults	-1.2472	0.000249507		CD02	tdTomato	-1.79843	0.000133255		tdTomato	-1.21817	0.000240918
RJ01	Juveniles	-1.12779	0.000269067		Adults	-1.2449	0.000262274		CD02	tdTomato	-1.79557	0.000136796		tdTomato	-1.21576	0.00025174
RJ01	Juveniles	-1.12555	0.000277438		Adults	-1.24259	0.000275612		CD02	tdTomato	-1.79272	0.000140428		tdTomato	-1.21335	0.000262992
RJ01	Juveniles	-1.12331	0.000286048		Adults	-1.24029	0.00028954		CD02	tdTomato	-1.78986	0.000144151		tdTomato	-1.21094	0.000274688
RJ01	Juveniles	-1.12107	0.000294904		Adults	-1.23799	0.00030408		CD02	tdTomato	-1.787	0.000147968		tdTomato	-1.20853	0.000286843
RJ01	Juveniles	-1.11883	0.000304012		Adults	-1.23569	0.000319254		CD02	tdTomato	-1.78414	0.000151881		tdTomato	-1.20613	0.000299472
RJ01	Juveniles	-1.11659	0.000313378		Adults	-1.23339	0.000335085		CD02	tdTomato	-1.78129	0.000155891		tdTomato	-1.20372	0.000312589
RJ01	Juveniles	-1.11434	0.000323009		Adults	-1.23108	0.000351594		CD02	tdTomato	-1.77843	0.000160001		tdTomato	-1.20131	0.000326212
RJ01	Juveniles	-1.1121	0.000332911		Adults	-1.22878	0.000368807		CD02	tdTomato	-1.77557	0.000164213		tdTomato	-1.1989	0.000340356
RJ01	Juveniles	-1.10986	0.000343092		Adults	-1.22648	0.000386745		CD02	tdTomato	-1.77271	0.000168528		tdTomato	-1.19649	0.000355037
RJ01	Juveniles	-1.10762	0.000353557		Adults	-1.22418	0.000405435		CD02	tdTomato	-1.76986	0.000172949		tdTomato	-1.19408	0.000370272
RJ01	Juveniles	-1.10538	0.000364314		Adults	-1.22187	0.000424901		CD02	tdTomato	-1.767	0.000177478		tdTomato	-1.19167	0.000386079
RJ01	Juveniles	-1.10314	0.00037537		Adults	-1.21957	0.000445167		CD02	tdTomato	-1.76414	0.000182118		tdTomato	-1.18926	0.000402475
RJ01	Juveniles	-1.1009	0.000386733		Adults	-1.21727	0.000466261		CD02	tdTomato	-1.76128	0.00018687		tdTomato	-1.18685	0.000419478
RJ01	Juveniles	-1.09866	0.000398409		Adults	-1.21497	0.000488209		CD02	tdTomato	-1.75843	0.000191737		tdTomato	-1.18444	0.000437107
RJ01	Juveniles	-1.09642	0.000410408		Adults	-1.21266	0.000511037		CD02	tdTomato	-1.75557	0.000196721		tdTomato	-1.18203	0.000455379
RJ01	Juveniles	-1.09418	0.000422735		Adults	-1.21036	0.000534774		CD02	tdTomato	-1.75271	0.000201825		tdTomato	-1.17962	0.000474314
RJ01	Juveniles	-1.09193	0.0004354		Adults	-1.20806	0.000559446		CD02	tdTomato	-1.74985	0.000207051		tdTomato	-1.17721	0.000493932
RJ01	Juveniles	-1.08969	0.000448411		Adults	-1.20576	0.000585082		CD02	tdTomato	-1.747	0.0002124		tdTomato	-1.1748	0.000514252
RJ01	Juveniles	-1.08745	0.000461775		Adults	-1.20346	0.000611712		CD02	tdTomato	-1.74414	0.000217877		tdTomato	-1.1724	0.000535295
RJ01	Juveniles	-1.08521	0.000475501		Adults	-1.20115	0.000639364		CD02	tdTomato	-1.74128	0.000223484		tdTomato	-1.16999	0.00055708
RJ01	Juveniles	-1.08297	0.000489599		Adults	-1.19885	0.000668067		CD02	tdTomato	-1.73842	0.000229222		tdTomato	-1.16758	0.00057963
RJ01	Juveniles	-1.08073	0.000504075		Adults	-1.19655	0.000697853		CD02	tdTomato	-1.73557	0.000235095		tdTomato	-1.16517	0.000602964
RJ01	Juveniles	-1.07849	0.000518941		Adults	-1.19425	0.000728751		CD02	tdTomato	-1.73271	0.000241105		tdTomato	-1.16276	0.000627105
RJ01	Juveniles	-1.07625	0.000534204		Adults	-1.19194	0.000760793		CD02	tdTomato	-1.72985	0.000247255		tdTomato	-1.16035	0.000652075
RJ01	Juveniles	-1.07401	0.000549874		Adults	-1.18964	0.000794009		CD02	tdTomato	-1.72699	0.000253548		tdTomato	-1.15794	0.000677897
RJ01	Juveniles	-1.07176	0.000565961		Adults	-1.18734	0.000828431		CD02	tdTomato	-1.72414	0.000259986		tdTomato	-1.15553	0.000704592
RJ01	Juveniles	-1.06952	0.000582474		Adults	-1.18504	0.000864091		CD02	tdTomato	-1.72128	0.000266573		tdTomato	-1.15312	0.000732183
RJ01	Juveniles	-1.06728	0.000599423		Adults	-1.18273	0.000901021		CD02	tdTomato	-1.71842	0.000273311		tdTomato	-1.15071	0.000760695
RJ01	Juveniles	-1.06504	0.000616818		Adults	-1.18043	0.000939253		CD02	tdTomato	-1.71556	0.000280203		tdTomato	-1.1483	0.000790151
RJ01	Juveniles	-1.0628	0.000634669		Adults	-1.17813	0.000978821		CD02	tdTomato	-1.71271	0.000287253		tdTomato	-1.14589	0.000820575
RJ01	Juveniles	-1.06056	0.000652987		Adults	-1.17583	0.00101976		CD02	tdTomato	-1.70985	0.000294462		tdTomato	-1.14348	0.000851991
RJ01	Juveniles	-1.05832	0.000671782		Adults	-1.17353	0.00106209		CD02	tdTomato	-1.70699	0.000301836		tdTomato	-1.14108	0.000884425
RJ01	Juveniles	-1.05608	0.000691066		Adults	-1.17122	0.00110587		CD02	tdTomato	-1.70413	0.000309375		tdTomato	-1.13867	0.0009179
RJ01	Juveniles	-1.05384	0.000710849		Adults	-1.16892	0.00115111		CD02	tdTomato	-1.70128	0.000317084		tdTomato	-1.13626	0.000952442
RJ01	Juveniles	-1.05159	0.000731142		Adults	-1.16662	0.00119785		CD02	tdTomato	-1.69842	0.000324966		tdTomato	-1.13385	0.000988077
RJ01	Juveniles	-1.04935	0.000751957		Adults	-1.16432	0.00124612		CD02	tdTomato	-1.69556	0.000333025		tdTomato	-1.13144	0.00102483
RJ01	Juveniles	-1.04711	0.000773305		Adults	-1.16201	0.00129597		CD02	tdTomato	-1.6927	0.000341262		tdTomato	-1.12903	0.00106273
RJ01	Juveniles	-1.04487	0.000795199		Adults	-1.15971	0.00134742		CD02	tdTomato	-1.68985	0.000349683		tdTomato	-1.12662	0.0011018
RJ01	Juveniles	-1.04263	0.00081765		Adults	-1.15741	0.0014005		CD02	tdTomato	-1.68699	0.00035829		tdTomato	-1.12421	0.00114207
RJ01	Juveniles	-1.04039	0.000840671		Adults	-1.15511	0.00145526		CD02	tdTomato	-1.68413	0.000367086		tdTomato	-1.1218	0.00118356
RJ01	Juveniles	-1.03815	0.000864274		Adults	-1.1528	0.00151171		CD02	tdTomato	-1.68127	0.000376076		tdTomato	-1.11939	0.0012263
RJ01	Juveniles	-1.03591	0.000888472		Adults	-1.1505	0.00156991		CD02	tdTomato	-1.67842	0.000385262		tdTomato	-1.11698	0.00127033
RJ01	Juveniles	-1.03367	0.000913277		Adults	-1.1482	0.00162987		CD02	tdTomato	-1.67556	0.00039465		tdTomato	-1.11457	0.00131566
RJ01	Juveniles	-1.03143	0.000938703		Adults	-1.1459	0.00169164		CD02	tdTomato	-1.6727	0.000404241		tdTomato	-1.11216	0.00136232
RJ01	Juveniles	-1.02918	0.000964763		Adults	-1.14359	0.00175525		CD02	tdTomato	-1.66984	0.00041404		tdTomato	-1.10975	0.00141034
RJ01	Juveniles	-1.02694	0.000991472		Adults	-1.14129	0.00182072		CD02	tdTomato	-1.66699	0.00042405		tdTomato	-1.10735	0.00145976
RJ01	Juveniles	-1.0247	0.00101884		Adults	-1.13899	0.00188809		CD02	tdTomato	-1.66413	0.000434277		tdTomato	-1.10494	0.00151059
RJ01	Juveniles	-1.02246	0.00104689		Adults	-1.13669	0.0019574		CD02	tdTomato	-1.66127	0.000444722		tdTomato	-1.10253	0.00156287
RJ01	Juveniles	-1.02022	0.00107562		Adults	-1.13439	0.00202867		CD02	tdTomato	-1.65841	0.000455391		tdTomato	-1.10012	0.00161663
RJ01	Juveniles	-1.01798	0.00110506		Adults	-1.13208	0.00210193		CD02	tdTomato	-1.65556	0.000466287		tdTomato	-1.09771	0.00167188
RJ01	Juveniles	-1.01574	0.00113522		Adults	-1.12978	0.00217722		CD02	tdTomato	-1.6527	0.000477415		tdTomato	-1.0953	0.00172867
RJ01	Juveniles	-1.0135	0.00116611		Adults	-1.12748	0.00225457		CD02	tdTomato	-1.64984	0.000488778		tdTomato	-1.09289	0.00178702
RJ01	Juveniles	-1.01126	0.00119776		Adults	-1.12518	0.002334		CD02	tdTomato	-1.64698	0.00050038		tdTomato	-1.09048	0.00184696
RJ01	Juveniles	-1.00901	0.00123016		Adults	-1.12287	0.00241554		CD02	tdTomato	-1.64412	0.000512227		tdTomato	-1.08807	0.00190851
RJ01	Juveniles	-1.00677	0.00126335		Adults	-1.12057	0.00249922		CD02	tdTomato	-1.64127	0.000524321		tdTomato	-1.08566	0.00197171
RJ01	Juveniles	-1.00453	0.00129733		Adults	-1.11827	0.00258507		CD02	tdTomato	-1.63841	0.000536668		tdTomato	-1.08325	0.00203658
RJ01	Juveniles	-1.00229	0.00133213		Adults	-1.11597	0.00267311		CD02	tdTomato	-1.63555	0.000549272		tdTomato	-1.08084	0.00210316
RJ01	Juveniles	-1.00005	0.00136776		Adults	-1.11366	0.00276337		CD02	tdTomato	-1.63269	0.000562137		tdTomato	-1.07843	0.00217146
RJ01	Juveniles	-0.997809	0.00140423		Adults	-1.11136	0.00285587		CD02	tdTomato	-1.62984	0.000575268		tdTomato	-1.07603	0.00224153
RJ01	Juveniles	-0.995568	0.00144157		Adults	-1.10906	0.00295064		CD02	tdTomato	-1.62698	0.000588669		tdTomato	-1.07362	0.00231338
RJ01	Juveniles	-0.993327	0.00147978		Adults	-1.10676	0.0030477		CD02	tdTomato	-1.62412	0.000602345		tdTomato	-1.07121	0.00238704
RJ01	Juveniles	-0.991086	0.00151889		Adults	-1.10446	0.00314707		CD02	tdTomato	-1.62126	0.0006163		tdTomato	-1.0688	0.00246255
RJ01	Juveniles	-0.988845	0.00155892		Adults	-1.10215	0.00324876		CD02	tdTomato	-1.61841	0.00063054		tdTomato	-1.06639	0.00253992
RJ01	Juveniles	-0.986604	0.00159988		Adults	-1.09985	0.00335281		CD02	tdTomato	-1.61555	0.000645069		tdTomato	-1.06398	0.0026192
RJ01	Juveniles	-0.984363	0.0016418		Adults	-1.09755	0.00345923		CD02	tdTomato	-1.61269	0.000659891		tdTomato	-1.06157	0.00270039
RJ01	Juveniles	-0.982122	0.00168468		Adults	-1.09525	0.00356802		CD02	tdTomato	-1.60983	0.000675012		tdTomato	-1.05916	0.00278354
RJ01	Juveniles	-0.979881	0.00172855		Adults	-1.09294	0.00367922		CD02	tdTomato	-1.60698	0.000690437		tdTomato	-1.05675	0.00286867
RJ01	Juveniles	-0.97764	0.00177344		Adults	-1.09064	0.00379283		CD02	tdTomato	-1.60412	0.000706171		tdTomato	-1.05434	0.00295579
RJ01	Juveniles	-0.975399	0.00181934		Adults	-1.08834	0.00390886		CD02	tdTomato	-1.60126	0.000722218		tdTomato	-1.05193	0.00304495
RJ01	Juveniles	-0.973158	0.0018663		Adults	-1.08604	0.00402733		CD02	tdTomato	-1.5984	0.000738584		tdTomato	-1.04952	0.00313615
RJ01	Juveniles	-0.970916	0.00191432		Adults	-1.08373	0.00414824		CD02	tdTomato	-1.59555	0.000755275		tdTomato	-1.04711	0.00322944
RJ01	Juveniles	-0.968675	0.00196343		Adults	-1.08143	0.0042716		CD02	tdTomato	-1.59269	0.000772294		tdTomato	-1.0447	0.00332483
RJ01	Juveniles	-0.966434	0.00201365		Adults	-1.07913	0.00439742		CD02	tdTomato	-1.58983	0.000789648		tdTomato	-1.0423	0.00342234
RJ01	Juveniles	-0.964193	0.00206499		Adults	-1.07683	0.0045257		CD02	tdTomato	-1.58697	0.000807342		tdTomato	-1.03989	0.003522
RJ01	Juveniles	-0.961952	0.00211749		Adults	-1.07453	0.00465645		CD02	tdTomato	-1.58412	0.000825381		tdTomato	-1.03748	0.00362384
RJ01	Juveniles	-0.959711	0.00217115		Adults	-1.07222	0.00478966		CD02	tdTomato	-1.58126	0.000843771		tdTomato	-1.03507	0.00372786
RJ01	Juveniles	-0.95747	0.00222601		Adults	-1.06992	0.00492534		CD02	tdTomato	-1.5784	0.000862517		tdTomato	-1.03266	0.00383411
RJ01	Juveniles	-0.955229	0.00228208		Adults	-1.06762	0.00506348		CD02	tdTomato	-1.57554	0.000881625		tdTomato	-1.03025	0.00394259
RJ01	Juveniles	-0.952988	0.00233939		Adults	-1.06532	0.00520407		CD02	tdTomato	-1.57269	0.0009011		tdTomato	-1.02784	0.00405332
RJ01	Juveniles	-0.950747	0.00239795		Adults	-1.06301	0.00534712		CD02	tdTomato	-1.56983	0.000920948		tdTomato	-1.02543	0.00416633
RJ01	Juveniles	-0.948506	0.0024578		Adults	-1.06071	0.00549261		CD02	tdTomato	-1.56697	0.000941176		tdTomato	-1.02302	0.00428163
RJ01	Juveniles	-0.946265	0.00251895		Adults	-1.05841	0.00564052		CD02	tdTomato	-1.56411	0.000961788		tdTomato	-1.02061	0.00439924
RJ01	Juveniles	-0.944024	0.00258142		Adults	-1.05611	0.00579086		CD02	tdTomato	-1.56126	0.000982791		tdTomato	-1.0182	0.00451919
RJ01	Juveniles	-0.941783	0.00264525		Adults	-1.0538	0.0059436		CD02	tdTomato	-1.5584	0.00100419		tdTomato	-1.01579	0.00464147
RJ01	Juveniles	-0.939542	0.00271045		Adults	-1.0515	0.00609872		CD02	tdTomato	-1.55554	0.00102599		tdTomato	-1.01338	0.00476612
RJ01	Juveniles	-0.9373	0.00277705		Adults	-1.0492	0.00625621		CD02	tdTomato	-1.55268	0.0010482		tdTomato	-1.01098	0.00489313
RJ01	Juveniles	-0.935059	0.00284508		Adults	-1.0469	0.00641605		CD02	tdTomato	-1.54983	0.00107083		tdTomato	-1.00857	0.00502254
RJ01	Juveniles	-0.932818	0.00291455		Adults	-1.0446	0.00657821		CD02	tdTomato	-1.54697	0.00109387		tdTomato	-1.00616	0.00515435
RJ01	Juveniles	-0.930577	0.00298549		Adults	-1.04229	0.00674267		CD02	tdTomato	-1.54411	0.00111734		tdTomato	-1.00375	0.00528856
RJ01	Juveniles	-0.928336	0.00305793		Adults	-1.03999	0.0069094		CD02	tdTomato	-1.54125	0.00114125		tdTomato	-1.00134	0.0054252
RJ01	Juveniles	-0.926095	0.0031319		Adults	-1.03769	0.00707836		CD02	tdTomato	-1.5384	0.00116559		tdTomato	-0.998929	0.00556426
RJ01	Juveniles	-0.923854	0.00320741		Adults	-1.03539	0.00724954		CD02	tdTomato	-1.53554	0.00119038		tdTomato	-0.99652	0.00570577
RJ01	Juveniles	-0.921613	0.00328449		Adults	-1.03308	0.00742288		CD02	tdTomato	-1.53268	0.00121563		tdTomato	-0.994111	0.00584972
RJ01	Juveniles	-0.919372	0.00336318		Adults	-1.03078	0.00759837		CD02	tdTomato	-1.52982	0.00124133		tdTomato	-0.991701	0.00599612
RJ01	Juveniles	-0.917131	0.0034435		Adults	-1.02848	0.00777595		CD02	tdTomato	-1.52697	0.0012675		tdTomato	-0.989292	0.00614497
RJ01	Juveniles	-0.91489	0.00352547		Adults	-1.02618	0.00795559		CD02	tdTomato	-1.52411	0.00129414		tdTomato	-0.986883	0.00629629
RJ01	Juveniles	-0.912649	0.00360912		Adults	-1.02387	0.00813724		CD02	tdTomato	-1.52125	0.00132125		tdTomato	-0.984474	0.00645007
RJ01	Juveniles	-0.910408	0.00369448		Adults	-1.02157	0.00832086		CD02	tdTomato	-1.51839	0.00134886		tdTomato	-0.982064	0.0066063
RJ01	Juveniles	-0.908167	0.00378158		Adults	-1.01927	0.0085064		CD02	tdTomato	-1.51554	0.00137695		tdTomato	-0.979655	0.006765
RJ01	Juveniles	-0.905926	0.00387045		Adults	-1.01697	0.00869381		CD02	tdTomato	-1.51268	0.00140554		tdTomato	-0.977246	0.00692616
RJ01	Juveniles	-0.903684	0.0039611		Adults	-1.01467	0.00888304		CD02	tdTomato	-1.50982	0.00143464		tdTomato	-0.974836	0.00708978
RJ01	Juveniles	-0.901443	0.00405358		Adults	-1.01236	0.00907403		CD02	tdTomato	-1.50696	0.00146426		tdTomato	-0.972427	0.00725585
RJ01	Juveniles	-0.899202	0.00414791		Adults	-1.01006	0.00926673		CD02	tdTomato	-1.50411	0.00149439		tdTomato	-0.970018	0.00742436
RJ01	Juveniles	-0.896961	0.00424412		Adults	-1.00776	0.00946108		CD02	tdTomato	-1.50125	0.00152504		tdTomato	-0.967609	0.00759531
RJ01	Juveniles	-0.89472	0.00434223		Adults	-1.00546	0.00965702		CD02	tdTomato	-1.49839	0.00155624		tdTomato	-0.965199	0.0077687
RJ01	Juveniles	-0.892479	0.00444229		Adults	-1.00315	0.00985449		CD02	tdTomato	-1.49553	0.00158797		tdTomato	-0.96279	0.0079445
RJ01	Juveniles	-0.890238	0.00454431		Adults	-1.00085	0.0100534		CD02	tdTomato	-1.49268	0.00162025		tdTomato	-0.960381	0.00812271
RJ01	Juveniles	-0.887997	0.00464833		Adults	-0.998549	0.0102537		CD02	tdTomato	-1.48982	0.00165308		tdTomato	-0.957972	0.00830332
RJ01	Juveniles	-0.885756	0.00475438		Adults	-0.996247	0.0104554		CD02	tdTomato	-1.48696	0.00168648		tdTomato	-0.955562	0.0084863
RJ01	Juveniles	-0.883515	0.00486249		Adults	-0.993945	0.0106583		CD02	tdTomato	-1.4841	0.00172045		tdTomato	-0.953153	0.00867165
RJ01	Juveniles	-0.881274	0.00497269		Adults	-0.991642	0.0108624		CD02	tdTomato	-1.48125	0.00175499		tdTomato	-0.950744	0.00885935
RJ01	Juveniles	-0.879033	0.00508501		Adults	-0.98934	0.0110676		CD02	tdTomato	-1.47839	0.00179012		tdTomato	-0.948335	0.00904937
RJ01	Juveniles	-0.876792	0.00519948		Adults	-0.987038	0.0112738		CD02	tdTomato	-1.47553	0.00182584		tdTomato	-0.945925	0.0092417
RJ01	Juveniles	-0.874551	0.00531614		Adults	-0.984735	0.011481		CD02	tdTomato	-1.47267	0.00186215		tdTomato	-0.943516	0.00943631
RJ01	Juveniles	-0.87231	0.00543502		Adults	-0.982433	0.0116891		CD02	tdTomato	-1.46982	0.00189908		tdTomato	-0.941107	0.00963318
RJ01	Juveniles	-0.870068	0.00555614		Adults	-0.980131	0.0118979		CD02	tdTomato	-1.46696	0.00193662		tdTomato	-0.938698	0.00983229
RJ01	Juveniles	-0.867827	0.00567954		Adults	-0.977828	0.0121075		CD02	tdTomato	-1.4641	0.00197478		tdTomato	-0.936288	0.0100336
RJ01	Juveniles	-0.865586	0.00580526		Adults	-0.975526	0.0123177		CD02	tdTomato	-1.46124	0.00201357		tdTomato	-0.933879	0.0102371
RJ01	Juveniles	-0.863345	0.00593332		Adults	-0.973224	0.0125285		CD02	tdTomato	-1.45839	0.002053		tdTomato	-0.93147	0.0104427
RJ01	Juveniles	-0.861104	0.00606376		Adults	-0.970921	0.0127397		CD02	tdTomato	-1.45553	0.00209308		tdTomato	-0.929061	0.0106505
RJ01	Juveniles	-0.858863	0.00619661		Adults	-0.968619	0.0129513		CD02	tdTomato	-1.45267	0.0021338		tdTomato	-0.926651	0.0108603
RJ01	Juveniles	-0.856622	0.00633191		Adults	-0.966317	0.0131632		CD02	tdTomato	-1.44981	0.00217519		tdTomato	-0.924242	0.0110722
RJ01	Juveniles	-0.854381	0.00646969		Adults	-0.964015	0.0133753		CD02	tdTomato	-1.44696	0.00221724		tdTomato	-0.921833	0.011286
RJ01	Juveniles	-0.85214	0.00660998		Adults	-0.961712	0.0135875		CD02	tdTomato	-1.4441	0.00225998		tdTomato	-0.919424	0.0115019
RJ01	Juveniles	-0.849899	0.00675282		Adults	-0.95941	0.0137997		CD02	tdTomato	-1.44124	0.00230339		tdTomato	-0.917014	0.0117197
RJ01	Juveniles	-0.847658	0.00689824		Adults	-0.957108	0.0140118		CD02	tdTomato	-1.43838	0.0023475		tdTomato	-0.914605	0.0119393
RJ01	Juveniles	-0.845417	0.00704627		Adults	-0.954805	0.0142238		CD02	tdTomato	-1.43553	0.00239231		tdTomato	-0.912196	0.0121608
RJ01	Juveniles	-0.843176	0.00719696		Adults	-0.952503	0.0144356		CD02	tdTomato	-1.43267	0.00243783		tdTomato	-0.909786	0.0123841
RJ01	Juveniles	-0.840935	0.00735033		Adults	-0.950201	0.0146469		CD02	tdTomato	-1.42981	0.00248406		tdTomato	-0.907377	0.0126092
RJ01	Juveniles	-0.838694	0.00750642		Adults	-0.947898	0.0148579		CD02	tdTomato	-1.42695	0.00253102		tdTomato	-0.904968	0.0128359
RJ01	Juveniles	-0.836452	0.00766527		Adults	-0.945596	0.0150683		CD02	tdTomato	-1.42409	0.00257871		tdTomato	-0.902559	0.0130643
RJ01	Juveniles	-0.834211	0.00782691		Adults	-0.943294	0.015278		CD02	tdTomato	-1.42124	0.00262714		tdTomato	-0.900149	0.0132943
RJ01	Juveniles	-0.83197	0.00799138		Adults	-0.940991	0.0154871		CD02	tdTomato	-1.41838	0.00267632		tdTomato	-0.89774	0.0135259
RJ01	Juveniles	-0.829729	0.0081587		Adults	-0.938689	0.0156953		CD02	tdTomato	-1.41552	0.00272625		tdTomato	-0.895331	0.0137589
RJ01	Juveniles	-0.827488	0.00832893		Adults	-0.936387	0.0159027		CD02	tdTomato	-1.41266	0.00277696		tdTomato	-0.892922	0.0139934
RJ01	Juveniles	-0.825247	0.00850209		Adults	-0.934084	0.016109		CD02	tdTomato	-1.40981	0.00282843		tdTomato	-0.890512	0.0142292
RJ01	Juveniles	-0.823006	0.00867822		Adults	-0.931782	0.0163143		CD02	tdTomato	-1.40695	0.00288069		tdTomato	-0.888103	0.0144664
RJ01	Juveniles	-0.820765	0.00885735		Adults	-0.92948	0.0165183		CD02	tdTomato	-1.40409	0.00293374		tdTomato	-0.885694	0.0147048
RJ01	Juveniles	-0.818524	0.00903953		Adults	-0.927178	0.0167211		CD02	tdTomato	-1.40123	0.00298758		tdTomato	-0.883285	0.0149444
RJ01	Juveniles	-0.816283	0.00922479		Adults	-0.924875	0.0169225		CD02	tdTomato	-1.39838	0.00304223		tdTomato	-0.880875	0.0151852
RJ01	Juveniles	-0.814042	0.00941316		Adults	-0.922573	0.0171225		CD02	tdTomato	-1.39552	0.0030977		tdTomato	-0.878466	0.015427
RJ01	Juveniles	-0.811801	0.00960469		Adults	-0.920271	0.017321		CD02	tdTomato	-1.39266	0.00315399		tdTomato	-0.876057	0.0156699
RJ01	Juveniles	-0.80956	0.0097994		Adults	-0.917968	0.0175178		CD02	tdTomato	-1.3898	0.00321112		tdTomato	-0.873648	0.0159136
RJ01	Juveniles	-0.807319	0.00999734		Adults	-0.915666	0.0177129		CD02	tdTomato	-1.38695	0.00326908		tdTomato	-0.871238	0.0161582
RJ01	Juveniles	-0.805078	0.0101985		Adults	-0.913364	0.0179062		CD02	tdTomato	-1.38409	0.00332789		tdTomato	-0.868829	0.0164037
RJ01	Juveniles	-0.802836	0.010403		Adults	-0.911061	0.0180976		CD02	tdTomato	-1.38123	0.00338756		tdTomato	-0.86642	0.0166498
RJ01	Juveniles	-0.800595	0.0106109		Adults	-0.908759	0.0182871		CD02	tdTomato	-1.37837	0.00344809		tdTomato	-0.864011	0.0168966
RJ01	Juveniles	-0.798354	0.0108221		Adults	-0.906457	0.0184745		CD02	tdTomato	-1.37552	0.0035095		tdTomato	-0.861601	0.017144
RJ01	Juveniles	-0.796113	0.0110367		Adults	-0.904154	0.0186598		CD02	tdTomato	-1.37266	0.00357179		tdTomato	-0.859192	0.0173919
RJ01	Juveniles	-0.793872	0.0112548		Adults	-0.901852	0.0188429		CD02	tdTomato	-1.3698	0.00363497		tdTomato	-0.856783	0.0176402
RJ01	Juveniles	-0.791631	0.0114764		Adults	-0.89955	0.0190238		CD02	tdTomato	-1.36694	0.00369906		tdTomato	-0.854374	0.0178889
RJ01	Juveniles	-0.78939	0.0117015		Adults	-0.897247	0.0192023		CD02	tdTomato	-1.36409	0.00376404		tdTomato	-0.851964	0.0181379
RJ01	Juveniles	-0.787149	0.0119301		Adults	-0.894945	0.0193784		CD02	tdTomato	-1.36123	0.00382995		tdTomato	-0.849555	0.018387
RJ01	Juveniles	-0.784908	0.0121624		Adults	-0.892643	0.019552		CD02	tdTomato	-1.35837	0.00389678		tdTomato	-0.847146	0.0186363
RJ01	Juveniles	-0.782667	0.0123982		Adults	-0.89034	0.0197231		CD02	tdTomato	-1.35551	0.00396454		tdTomato	-0.844736	0.0188856
RJ01	Juveniles	-0.780426	0.0126378		Adults	-0.888038	0.0198916		CD02	tdTomato	-1.35266	0.00403325		tdTomato	-0.842327	0.0191349
RJ01	Juveniles	-0.778185	0.0128811		Adults	-0.885736	0.0200574		CD02	tdTomato	-1.3498	0.0041029		tdTomato	-0.839918	0.0193841
RJ01	Juveniles	-0.775944	0.0131281		Adults	-0.883434	0.0202206		CD02	tdTomato	-1.34694	0.00417352		tdTomato	-0.837509	0.019633
RJ01	Juveniles	-0.773703	0.0133789		Adults	-0.881131	0.0203809		CD02	tdTomato	-1.34408	0.0042451		tdTomato	-0.835099	0.0198817
RJ01	Juveniles	-0.771462	0.0136335		Adults	-0.878829	0.0205384		CD02	tdTomato	-1.34123	0.00431765		tdTomato	-0.83269	0.02013
RJ01	Juveniles	-0.76922	0.013892		Adults	-0.876527	0.020693		CD02	tdTomato	-1.33837	0.0043912		tdTomato	-0.830281	0.0203779
RJ01	Juveniles	-0.766979	0.0141544		Adults	-0.874224	0.0208447		CD02	tdTomato	-1.33551	0.00446573		tdTomato	-0.827872	0.0206252
RJ01	Juveniles	-0.764738	0.0144207		Adults	-0.871922	0.0209934		CD02	tdTomato	-1.33265	0.00454126		tdTomato	-0.825462	0.0208719
RJ01	Juveniles	-0.762497	0.014691		Adults	-0.86962	0.0211391		CD02	tdTomato	-1.3298	0.00461781		tdTomato	-0.823053	0.0211179
RJ01	Juveniles	-0.760256	0.0149653		Adults	-0.867317	0.0212818		CD02	tdTomato	-1.32694	0.00469537		tdTomato	-0.820644	0.0213632
RJ01	Juveniles	-0.758015	0.0152436		Adults	-0.865015	0.0214214		CD02	tdTomato	-1.32408	0.00477396		tdTomato	-0.818235	0.0216075
RJ01	Juveniles	-0.755774	0.015526		Adults	-0.862713	0.0215579		CD02	tdTomato	-1.32122	0.00485358		tdTomato	-0.815825	0.021851
RJ01	Juveniles	-0.753533	0.0158126		Adults	-0.86041	0.0216912		CD02	tdTomato	-1.31837	0.00493424		tdTomato	-0.813416	0.0220933
RJ01	Juveniles	-0.751292	0.0161033		Adults	-0.858108	0.0218214		CD02	tdTomato	-1.31551	0.00501596		tdTomato	-0.811007	0.0223346
RJ01	Juveniles	-0.749051	0.0163981		Adults	-0.855806	0.0219484		CD02	tdTomato	-1.31265	0.00509873		tdTomato	-0.808598	0.0225746
RJ01	Juveniles	-0.74681	0.0166973		Adults	-0.853503	0.0220722		CD02	tdTomato	-1.30979	0.00518258		tdTomato	-0.806188	0.0228134
RJ01	Juveniles	-0.744569	0.0170006		Adults	-0.851201	0.0221927		CD02	tdTomato	-1.30694	0.0052675		tdTomato	-0.803779	0.0230508
RJ01	Juveniles	-0.742328	0.0173083		Adults	-0.848899	0.02231		CD02	tdTomato	-1.30408	0.0053535		tdTomato	-0.80137	0.0232867
RJ01	Juveniles	-0.740087	0.0176203		Adults	-0.846597	0.0224241		CD02	tdTomato	-1.30122	0.0054406		tdTomato	-0.798961	0.0235211
RJ01	Juveniles	-0.737846	0.0179367		Adults	-0.844294	0.022535		CD02	tdTomato	-1.29836	0.00552879		tdTomato	-0.796551	0.0237538
RJ01	Juveniles	-0.735604	0.0182575		Adults	-0.841992	0.0226425		CD02	tdTomato	-1.29551	0.0056181		tdTomato	-0.794142	0.0239849
RJ01	Juveniles	-0.733363	0.0185828		Adults	-0.83969	0.0227469		CD02	tdTomato	-1.29265	0.00570852		tdTomato	-0.791733	0.0242141
RJ01	Juveniles	-0.731122	0.0189125		Adults	-0.837387	0.022848		CD02	tdTomato	-1.28979	0.00580007		tdTomato	-0.789324	0.0244415
RJ01	Juveniles	-0.728881	0.0192467		Adults	-0.835085	0.0229458		CD02	tdTomato	-1.28693	0.00589275		tdTomato	-0.786914	0.024667
RJ01	Juveniles	-0.72664	0.0195855		Adults	-0.832783	0.0230405		CD02	tdTomato	-1.28408	0.00598657		tdTomato	-0.784505	0.0248904
RJ01	Juveniles	-0.724399	0.0199288		Adults	-0.83048	0.0231319		CD02	tdTomato	-1.28122	0.00608154		tdTomato	-0.782096	0.0251117
RJ01	Juveniles	-0.722158	0.0202768		Adults	-0.828178	0.0232201		CD02	tdTomato	-1.27836	0.00617767		tdTomato	-0.779686	0.0253308
RJ01	Juveniles	-0.719917	0.0206294		Adults	-0.825876	0.0233052		CD02	tdTomato	-1.2755	0.00627496		tdTomato	-0.777277	0.0255476
RJ01	Juveniles	-0.717676	0.0209867		Adults	-0.823573	0.0233871		CD02	tdTomato	-1.27265	0.00637343		tdTomato	-0.774868	0.0257621
RJ01	Juveniles	-0.715435	0.0213487		Adults	-0.821271	0.0234659		CD02	tdTomato	-1.26979	0.00647307		tdTomato	-0.772459	0.0259742
RJ01	Juveniles	-0.713194	0.0217155		Adults	-0.818969	0.0235416		CD02	tdTomato	-1.26693	0.00657391		tdTomato	-0.770049	0.0261838
RJ01	Juveniles	-0.710953	0.0220871		Adults	-0.816666	0.0236142		CD02	tdTomato	-1.26407	0.00667594		tdTomato	-0.76764	0.0263908
RJ01	Juveniles	-0.708712	0.0224634		Adults	-0.814364	0.0236839		CD02	tdTomato	-1.26122	0.00677917		tdTomato	-0.765231	0.0265952
RJ01	Juveniles	-0.706471	0.0228446		Adults	-0.812062	0.0237505		CD02	tdTomato	-1.25836	0.00688362		tdTomato	-0.762822	0.0267969
RJ01	Juveniles	-0.70423	0.0232307		Adults	-0.80976	0.0238142		CD02	tdTomato	-1.2555	0.00698928		tdTomato	-0.760412	0.0269958
RJ01	Juveniles	-0.701988	0.0236217		Adults	-0.807457	0.023875		CD02	tdTomato	-1.25264	0.00709617		tdTomato	-0.758003	0.0271918
RJ01	Juveniles	-0.699747	0.0240176		Adults	-0.805155	0.023933		CD02	tdTomato	-1.24979	0.0072043		tdTomato	-0.755594	0.0273849
RJ01	Juveniles	-0.697506	0.0244186		Adults	-0.802853	0.0239881		CD02	tdTomato	-1.24693	0.00731366		tdTomato	-0.753185	0.0275751
RJ01	Juveniles	-0.695265	0.0248245		Adults	-0.80055	0.0240405		CD02	tdTomato	-1.24407	0.00742428		tdTomato	-0.750775	0.0277622
RJ01	Juveniles	-0.693024	0.0252354		Adults	-0.798248	0.0240903		CD02	tdTomato	-1.24121	0.00753615		tdTomato	-0.748366	0.0279462
RJ01	Juveniles	-0.690783	0.0256514		Adults	-0.795946	0.0241373		CD02	tdTomato	-1.23836	0.00764928		tdTomato	-0.745957	0.0281271
RJ01	Juveniles	-0.688542	0.0260725		Adults	-0.793643	0.0241818		CD02	tdTomato	-1.2355	0.00776369		tdTomato	-0.743548	0.0283047
RJ01	Juveniles	-0.686301	0.0264987		Adults	-0.791341	0.0242238		CD02	tdTomato	-1.23264	0.00787937		tdTomato	-0.741138	0.028479
RJ01	Juveniles	-0.68406	0.02693		Adults	-0.789039	0.0242633		CD02	tdTomato	-1.22978	0.00799634		tdTomato	-0.738729	0.0286501
RJ01	Juveniles	-0.681819	0.0273666		Adults	-0.786736	0.0243005		CD02	tdTomato	-1.22693	0.0081146		tdTomato	-0.73632	0.0288177
RJ01	Juveniles	-0.679578	0.0278083		Adults	-0.784434	0.0243353		CD02	tdTomato	-1.22407	0.00823416		tdTomato	-0.733911	0.0289819
RJ01	Juveniles	-0.677337	0.0282552		Adults	-0.782132	0.0243679		CD02	tdTomato	-1.22121	0.00835502		tdTomato	-0.731501	0.0291426
RJ01	Juveniles	-0.675096	0.0287075		Adults	-0.779829	0.0243982		CD02	tdTomato	-1.21835	0.0084772		tdTomato	-0.729092	0.0292997
RJ01	Juveniles	-0.672855	0.0291649		Adults	-0.777527	0.0244265		CD02	tdTomato	-1.2155	0.00860069		tdTomato	-0.726683	0.0294533
RJ01	Juveniles	-0.670614	0.0296277		Adults	-0.775225	0.0244528		CD02	tdTomato	-1.21264	0.00872551		tdTomato	-0.724274	0.0296033
RJ01	Juveniles	-0.668373	0.0300959		Adults	-0.772923	0.024477		CD02	tdTomato	-1.20978	0.00885167		tdTomato	-0.721864	0.0297496
RJ01	Juveniles	-0.666131	0.0305694		Adults	-0.77062	0.0244994		CD02	tdTomato	-1.20692	0.00897916		tdTomato	-0.719455	0.0298922
RJ01	Juveniles	-0.66389	0.0310482		Adults	-0.768318	0.02452		CD02	tdTomato	-1.20407	0.009108		tdTomato	-0.717046	0.030031
RJ01	Juveniles	-0.661649	0.0315325		Adults	-0.766016	0.0245388		CD02	tdTomato	-1.20121	0.00923819		tdTomato	-0.714637	0.0301661
RJ01	Juveniles	-0.659408	0.0320222		Adults	-0.763713	0.024556		CD02	tdTomato	-1.19835	0.00936974		tdTomato	-0.712227	0.0302973
RJ01	Juveniles	-0.657167	0.0325173		Adults	-0.761411	0.0245716		CD02	tdTomato	-1.19549	0.00950265		tdTomato	-0.709818	0.0304247
RJ01	Juveniles	-0.654926	0.0330179		Adults	-0.759109	0.0245857		CD02	tdTomato	-1.19263	0.00963694		tdTomato	-0.707409	0.0305483
RJ01	Juveniles	-0.652685	0.033524		Adults	-0.756806	0.0245984		CD02	tdTomato	-1.18978	0.0097726		tdTomato	-0.704999	0.0306679
RJ01	Juveniles	-0.650444	0.0340357		Adults	-0.754504	0.0246098		CD02	tdTomato	-1.18692	0.00990965		tdTomato	-0.70259	0.0307837
RJ01	Juveniles	-0.648203	0.0345528		Adults	-0.752202	0.0246199		CD02	tdTomato	-1.18406	0.0100481		tdTomato	-0.700181	0.0308955
RJ01	Juveniles	-0.645962	0.0350755		Adults	-0.749899	0.0246288		CD02	tdTomato	-1.1812	0.0101879		tdTomato	-0.697772	0.0310033
RJ01	Juveniles	-0.643721	0.0356038		Adults	-0.747597	0.0246366		CD02	tdTomato	-1.17835	0.0103291		tdTomato	-0.695362	0.0311072
RJ01	Juveniles	-0.64148	0.0361377		Adults	-0.745295	0.0246434		CD02	tdTomato	-1.17549	0.0104718		tdTomato	-0.692953	0.0312071
RJ01	Juveniles	-0.639239	0.0366771		Adults	-0.742992	0.0246493		CD02	tdTomato	-1.17263	0.0106158		tdTomato	-0.690544	0.0313029
RJ01	Juveniles	-0.636998	0.0372222		Adults	-0.74069	0.0246543		CD02	tdTomato	-1.16977	0.0107613		tdTomato	-0.688135	0.0313948
RJ01	Juveniles	-0.634757	0.037773		Adults	-0.738388	0.0246586		CD02	tdTomato	-1.16692	0.0109082		tdTomato	-0.685725	0.0314826
RJ01	Juveniles	-0.632515	0.0383294		Adults	-0.736086	0.0246622		CD02	tdTomato	-1.16406	0.0110565		tdTomato	-0.683316	0.0315665
RJ01	Juveniles	-0.630274	0.0388914		Adults	-0.733783	0.0246651		CD02	tdTomato	-1.1612	0.0112063		tdTomato	-0.680907	0.0316463
RJ01	Juveniles	-0.628033	0.0394592		Adults	-0.731481	0.0246675		CD02	tdTomato	-1.15834	0.0113575		tdTomato	-0.678498	0.0317221
RJ01	Juveniles	-0.625792	0.0400327		Adults	-0.729179	0.0246694		CD02	tdTomato	-1.15549	0.0115101		tdTomato	-0.676088	0.0317938
RJ01	Juveniles	-0.623551	0.0406118		Adults	-0.726876	0.024671		CD02	tdTomato	-1.15263	0.0116642		tdTomato	-0.673679	0.0318616
RJ01	Juveniles	-0.62131	0.0411967		Adults	-0.724574	0.0246722		CD02	tdTomato	-1.14977	0.0118197		tdTomato	-0.67127	0.0319253
RJ01	Juveniles	-0.619069	0.0417874		Adults	-0.722272	0.0246732		CD02	tdTomato	-1.14691	0.0119768		tdTomato	-0.668861	0.0319851
RJ01	Juveniles	-0.616828	0.0423838		Adults	-0.719969	0.0246741		CD02	tdTomato	-1.14406	0.0121352		tdTomato	-0.666451	0.0320409
RJ01	Juveniles	-0.614587	0.042986		Adults	-0.717667	0.0246748		CD02	tdTomato	-1.1412	0.0122952		tdTomato	-0.664042	0.0320926
RJ01	Juveniles	-0.612346	0.0435939		Adults	-0.715365	0.0246755		CD02	tdTomato	-1.13834	0.0124566		tdTomato	-0.661633	0.0321405
RJ01	Juveniles	-0.610105	0.0442076		Adults	-0.713062	0.0246763		CD02	tdTomato	-1.13548	0.0126195		tdTomato	-0.659224	0.0321844
RJ01	Juveniles	-0.607864	0.0448271		Adults	-0.71076	0.0246771		CD02	tdTomato	-1.13263	0.0127839		tdTomato	-0.656814	0.0322244
RJ01	Juveniles	-0.605623	0.0454524		Adults	-0.708458	0.0246782		CD02	tdTomato	-1.12977	0.0129497		tdTomato	-0.654405	0.0322605
RJ01	Juveniles	-0.603382	0.0460836		Adults	-0.706155	0.0246795		CD02	tdTomato	-1.12691	0.0131171		tdTomato	-0.651996	0.0322928
RJ01	Juveniles	-0.601141	0.0467205		Adults	-0.703853	0.0246811		CD02	tdTomato	-1.12405	0.013286		tdTomato	-0.649587	0.0323212
RJ01	Juveniles	-0.598899	0.0473633		Adults	-0.701551	0.0246831		CD02	tdTomato	-1.1212	0.0134563		tdTomato	-0.647177	0.0323459
RJ01	Juveniles	-0.596658	0.0480118		Adults	-0.699248	0.0246855		CD02	tdTomato	-1.11834	0.0136282		tdTomato	-0.644768	0.0323667
RJ01	Juveniles	-0.594417	0.0486663		Adults	-0.696946	0.0246884		CD02	tdTomato	-1.11548	0.0138016		tdTomato	-0.642359	0.0323839
RJ01	Juveniles	-0.592176	0.0493265		Adults	-0.694644	0.0246918		CD02	tdTomato	-1.11262	0.0139765		tdTomato	-0.639949	0.0323973
RJ01	Juveniles	-0.589935	0.0499926		Adults	-0.692342	0.0246958		CD02	tdTomato	-1.10977	0.0141529		tdTomato	-0.63754	0.0324071
RJ01	Juveniles	-0.587694	0.0506646		Adults	-0.690039	0.0247005		CD02	tdTomato	-1.10691	0.0143308		tdTomato	-0.635131	0.0324133
RJ01	Juveniles	-0.585453	0.0513423		Adults	-0.687737	0.0247058		CD02	tdTomato	-1.10405	0.0145103		tdTomato	-0.632722	0.032416
RJ01	Juveniles	-0.583212	0.052026		Adults	-0.685435	0.0247119		CD02	tdTomato	-1.10119	0.0146913		tdTomato	-0.630312	0.0324151
RJ01	Juveniles	-0.580971	0.0527154		Adults	-0.683132	0.0247188		CD02	tdTomato	-1.09834	0.0148738		tdTomato	-0.627903	0.0324108
RJ01	Juveniles	-0.57873	0.0534107		Adults	-0.68083	0.0247266		CD02	tdTomato	-1.09548	0.0150579		tdTomato	-0.625494	0.032403
RJ01	Juveniles	-0.576489	0.0541119		Adults	-0.678528	0.0247352		CD02	tdTomato	-1.09262	0.0152435		tdTomato	-0.623085	0.0323919
RJ01	Juveniles	-0.574248	0.0548189		Adults	-0.676225	0.0247448		CD02	tdTomato	-1.08976	0.0154307		tdTomato	-0.620675	0.0323775
RJ01	Juveniles	-0.572007	0.0555318		Adults	-0.673923	0.0247553		CD02	tdTomato	-1.08691	0.0156194		tdTomato	-0.618266	0.0323598
RJ01	Juveniles	-0.569766	0.0562505		Adults	-0.671621	0.0247668		CD02	tdTomato	-1.08405	0.0158096		tdTomato	-0.615857	0.032339
RJ01	Juveniles	-0.567525	0.056975		Adults	-0.669318	0.0247794		CD02	tdTomato	-1.08119	0.0160014		tdTomato	-0.613448	0.032315
RJ01	Juveniles	-0.565283	0.0577053		Adults	-0.667016	0.024793		CD02	tdTomato	-1.07833	0.0161948		tdTomato	-0.611038	0.0322879
RJ01	Juveniles	-0.563042	0.0584415		Adults	-0.664714	0.0248078		CD02	tdTomato	-1.07548	0.0163897		tdTomato	-0.608629	0.0322579
RJ01	Juveniles	-0.560801	0.0591835		Adults	-0.662411	0.0248237		CD02	tdTomato	-1.07262	0.0165862		tdTomato	-0.60622	0.0322249
RJ01	Juveniles	-0.55856	0.0599314		Adults	-0.660109	0.0248408		CD02	tdTomato	-1.06976	0.0167843		tdTomato	-0.603811	0.032189
RJ01	Juveniles	-0.556319	0.060685		Adults	-0.657807	0.024859		CD02	tdTomato	-1.0669	0.0169839		tdTomato	-0.601401	0.0321504
RJ01	Juveniles	-0.554078	0.0614444		Adults	-0.655505	0.0248785		CD02	tdTomato	-1.06405	0.0171852		tdTomato	-0.598992	0.032109
RJ01	Juveniles	-0.551837	0.0622097		Adults	-0.653202	0.0248993		CD02	tdTomato	-1.06119	0.0173879		tdTomato	-0.596583	0.032065
RJ01	Juveniles	-0.549596	0.0629807		Adults	-0.6509	0.0249213		CD02	tdTomato	-1.05833	0.0175923		tdTomato	-0.594174	0.0320184
RJ01	Juveniles	-0.547355	0.0637574		Adults	-0.648598	0.0249447		CD02	tdTomato	-1.05547	0.0177983		tdTomato	-0.591764	0.0319693
RJ01	Juveniles	-0.545114	0.06454		Adults	-0.646295	0.0249693		CD02	tdTomato	-1.05262	0.0180058		tdTomato	-0.589355	0.0319178
RJ01	Juveniles	-0.542873	0.0653283		Adults	-0.643993	0.0249953		CD02	tdTomato	-1.04976	0.0182149		tdTomato	-0.586946	0.0318639
RJ01	Juveniles	-0.540632	0.0661223		Adults	-0.641691	0.0250227		CD02	tdTomato	-1.0469	0.0184257		tdTomato	-0.584537	0.0318078
RJ01	Juveniles	-0.538391	0.0669221		Adults	-0.639388	0.0250514		CD02	tdTomato	-1.04404	0.018638		tdTomato	-0.582127	0.0317495
RJ01	Juveniles	-0.53615	0.0677276		Adults	-0.637086	0.0250816		CD02	tdTomato	-1.04119	0.0188519		tdTomato	-0.579718	0.0316891
RJ01	Juveniles	-0.533909	0.0685388		Adults	-0.634784	0.0251132		CD02	tdTomato	-1.03833	0.0190674		tdTomato	-0.577309	0.0316266
RJ01	Juveniles	-0.531667	0.0693557		Adults	-0.632481	0.0251462		CD02	tdTomato	-1.03547	0.0192845		tdTomato	-0.574899	0.0315623
RJ01	Juveniles	-0.529426	0.0701782		Adults	-0.630179	0.0251806		CD02	tdTomato	-1.03261	0.0195032		tdTomato	-0.57249	0.0314961
RJ01	Juveniles	-0.527185	0.0710065		Adults	-0.627877	0.0252165		CD02	tdTomato	-1.02976	0.0197236		tdTomato	-0.570081	0.0314281
RJ01	Juveniles	-0.524944	0.0718403		Adults	-0.625574	0.0252539		CD02	tdTomato	-1.0269	0.0199455		tdTomato	-0.567672	0.0313585
RJ01	Juveniles	-0.522703	0.0726798		Adults	-0.623272	0.0252928		CD02	tdTomato	-1.02404	0.0201691		tdTomato	-0.565262	0.0312873
RJ01	Juveniles	-0.520462	0.0735249		Adults	-0.62097	0.0253332		CD02	tdTomato	-1.02118	0.0203942		tdTomato	-0.562853	0.0312146
RJ01	Juveniles	-0.518221	0.0743756		Adults	-0.618668	0.025375		CD02	tdTomato	-1.01833	0.020621		tdTomato	-0.560444	0.0311405
RJ01	Juveniles	-0.51598	0.0752319		Adults	-0.616365	0.0254185		CD02	tdTomato	-1.01547	0.0208494		tdTomato	-0.558035	0.0310651
RJ01	Juveniles	-0.513739	0.0760937		Adults	-0.614063	0.0254634		CD02	tdTomato	-1.01261	0.0210794		tdTomato	-0.555625	0.0309885
RJ01	Juveniles	-0.511498	0.0769611		Adults	-0.611761	0.0255099		CD02	tdTomato	-1.00975	0.0213111		tdTomato	-0.553216	0.0309108
RJ01	Juveniles	-0.509257	0.077834		Adults	-0.609458	0.025558		CD02	tdTomato	-1.0069	0.0215443		tdTomato	-0.550807	0.030832
RJ01	Juveniles	-0.507016	0.0787124		Adults	-0.607156	0.0256076		CD02	tdTomato	-1.00404	0.0217792		tdTomato	-0.548398	0.0307524
RJ01	Juveniles	-0.504775	0.0795963		Adults	-0.604854	0.0256589		CD02	tdTomato	-1.00118	0.0220157		tdTomato	-0.545988	0.0306719
RJ01	Juveniles	-0.502534	0.0804856		Adults	-0.602551	0.0257117		CD02	tdTomato	-0.998323	0.0222539		tdTomato	-0.543579	0.0305906
RJ01	Juveniles	-0.500293	0.0813804		Adults	-0.600249	0.0257661		CD02	tdTomato	-0.995465	0.0224937		tdTomato	-0.54117	0.0305088
RJ01	Juveniles	-0.498051	0.0822805		Adults	-0.597947	0.0258222		CD02	tdTomato	-0.992608	0.0227351		tdTomato	-0.538761	0.0304264
RJ01	Juveniles	-0.49581	0.0831861		Adults	-0.595644	0.0258798		CD02	tdTomato	-0.98975	0.0229782		tdTomato	-0.536351	0.0303435
RJ01	Juveniles	-0.493569	0.084097		Adults	-0.593342	0.0259392		CD02	tdTomato	-0.986893	0.0232229		tdTomato	-0.533942	0.0302603
RJ01	Juveniles	-0.491328	0.0850133		Adults	-0.59104	0.0260001		CD02	tdTomato	-0.984035	0.0234693		tdTomato	-0.531533	0.0301769
RJ01	Juveniles	-0.489087	0.0859349		Adults	-0.588737	0.0260628		CD02	tdTomato	-0.981178	0.0237173		tdTomato	-0.529124	0.0300933
RJ01	Juveniles	-0.486846	0.0868618		Adults	-0.586435	0.0261271		CD02	tdTomato	-0.97832	0.0239669		tdTomato	-0.526714	0.0300097
RJ01	Juveniles	-0.484605	0.087794		Adults	-0.584133	0.0261932		CD02	tdTomato	-0.975463	0.0242182		tdTomato	-0.524305	0.0299261
RJ01	Juveniles	-0.482364	0.0887314		Adults	-0.581831	0.0262609		CD02	tdTomato	-0.972605	0.0244712		tdTomato	-0.521896	0.0298426
RJ01	Juveniles	-0.480123	0.089674		Adults	-0.579528	0.0263304		CD02	tdTomato	-0.969747	0.0247258		tdTomato	-0.519487	0.0297595
RJ01	Juveniles	-0.477882	0.0906218		Adults	-0.577226	0.0264016		CD02	tdTomato	-0.96689	0.0249821		tdTomato	-0.517077	0.0296766
RJ01	Juveniles	-0.475641	0.0915749		Adults	-0.574924	0.0264745		CD02	tdTomato	-0.964032	0.02524		tdTomato	-0.514668	0.0295943
RJ01	Juveniles	-0.4734	0.092533		Adults	-0.572621	0.0265493		CD02	tdTomato	-0.961175	0.0254996		tdTomato	-0.512259	0.0295125
RJ01	Juveniles	-0.471159	0.0934963		Adults	-0.570319	0.0266258		CD02	tdTomato	-0.958317	0.0257608		tdTomato	-0.509849	0.0294313
RJ01	Juveniles	-0.468918	0.0944646		Adults	-0.568017	0.0267042		CD02	tdTomato	-0.95546	0.0260237		tdTomato	-0.50744	0.0293509
RJ01	Juveniles	-0.466677	0.095438		Adults	-0.565714	0.0267844		CD02	tdTomato	-0.952602	0.0262883		tdTomato	-0.505031	0.0292713
RJ01	Juveniles	-0.464435	0.0964165		Adults	-0.563412	0.0268664		CD02	tdTomato	-0.949745	0.0265546		tdTomato	-0.502622	0.0291927
RJ01	Juveniles	-0.462194	0.0974		Adults	-0.56111	0.0269503		CD02	tdTomato	-0.946887	0.0268225		tdTomato	-0.500212	0.0291152
RJ01	Juveniles	-0.459953	0.0983884		Adults	-0.558807	0.0270362		CD02	tdTomato	-0.94403	0.0270921		tdTomato	-0.497803	0.0290388
RJ01	Juveniles	-0.457712	0.0993818		Adults	-0.556505	0.0271239		CD02	tdTomato	-0.941172	0.0273634		tdTomato	-0.495394	0.0289637
RJ01	Juveniles	-0.455471	0.10038		Adults	-0.554203	0.0272136		CD02	tdTomato	-0.938315	0.0276364		tdTomato	-0.492985	0.0288899
RJ01	Juveniles	-0.45323	0.101383		Adults	-0.5519	0.0273052		CD02	tdTomato	-0.935457	0.027911		tdTomato	-0.490575	0.0288176
RJ01	Juveniles	-0.450989	0.102391		Adults	-0.549598	0.0273988		CD02	tdTomato	-0.9326	0.0281874		tdTomato	-0.488166	0.0287468
RJ01	Juveniles	-0.448748	0.103404		Adults	-0.547296	0.0274944		CD02	tdTomato	-0.929742	0.0284654		tdTomato	-0.485757	0.0286777
RJ01	Juveniles	-0.446507	0.104422		Adults	-0.544994	0.0275921		CD02	tdTomato	-0.926884	0.0287451		tdTomato	-0.483348	0.0286103
RJ01	Juveniles	-0.444266	0.105445		Adults	-0.542691	0.0276919		CD02	tdTomato	-0.924027	0.0290265		tdTomato	-0.480938	0.0285448
RJ01	Juveniles	-0.442025	0.106472		Adults	-0.540389	0.0277937		CD02	tdTomato	-0.921169	0.0293097		tdTomato	-0.478529	0.0284812
RJ01	Juveniles	-0.439784	0.107504		Adults	-0.538087	0.0278976		CD02	tdTomato	-0.918312	0.0295945		tdTomato	-0.47612	0.0284197
RJ01	Juveniles	-0.437543	0.108541		Adults	-0.535784	0.0280037		CD02	tdTomato	-0.915454	0.029881		tdTomato	-0.473711	0.0283603
RJ01	Juveniles	-0.435302	0.109582		Adults	-0.533482	0.028112		CD02	tdTomato	-0.912597	0.0301692		tdTomato	-0.471301	0.0283031
RJ01	Juveniles	-0.433061	0.110628		Adults	-0.53118	0.0282225		CD02	tdTomato	-0.909739	0.0304591		tdTomato	-0.468892	0.0282483
RJ01	Juveniles	-0.430819	0.111679		Adults	-0.528877	0.0283352		CD02	tdTomato	-0.906882	0.0307508		tdTomato	-0.466483	0.0281959
RJ01	Juveniles	-0.428578	0.112734		Adults	-0.526575	0.0284501		CD02	tdTomato	-0.904024	0.0310441		tdTomato	-0.464074	0.0281461
RJ01	Juveniles	-0.426337	0.113793		Adults	-0.524273	0.0285674		CD02	tdTomato	-0.901167	0.0313392		tdTomato	-0.461664	0.0280988
RJ01	Juveniles	-0.424096	0.114858		Adults	-0.52197	0.028687		CD02	tdTomato	-0.898309	0.031636		tdTomato	-0.459255	0.0280543
RJ01	Juveniles	-0.421855	0.115926		Adults	-0.519668	0.0288089		CD02	tdTomato	-0.895452	0.0319346		tdTomato	-0.456846	0.0280126
RJ01	Juveniles	-0.419614	0.117		Adults	-0.517366	0.0289332		CD02	tdTomato	-0.892594	0.0322348		tdTomato	-0.454437	0.0279738
RJ01	Juveniles	-0.417373	0.118077		Adults	-0.515063	0.02906		CD02	tdTomato	-0.889737	0.0325368		tdTomato	-0.452027	0.027938
RJ01	Juveniles	-0.415132	0.119159		Adults	-0.512761	0.0291891		CD02	tdTomato	-0.886879	0.0328405		tdTomato	-0.449618	0.0279053
RJ01	Juveniles	-0.412891	0.120246		Adults	-0.510459	0.0293208		CD02	tdTomato	-0.884022	0.033146		tdTomato	-0.447209	0.0278757
RJ01	Juveniles	-0.41065	0.121337		Adults	-0.508156	0.0294549		CD02	tdTomato	-0.881164	0.0334532		tdTomato	-0.444799	0.0278495
RJ01	Juveniles	-0.408409	0.122432		Adults	-0.505854	0.0295916		CD02	tdTomato	-0.878306	0.0337622		tdTomato	-0.44239	0.0278266
RJ01	Juveniles	-0.406168	0.123531		Adults	-0.503552	0.0297308		CD02	tdTomato	-0.875449	0.0340729		tdTomato	-0.439981	0.0278071
RJ01	Juveniles	-0.403927	0.124635		Adults	-0.50125	0.0298726		CD02	tdTomato	-0.872591	0.0343854		tdTomato	-0.437572	0.0277912
RJ01	Juveniles	-0.401686	0.125743		Adults	-0.498947	0.0300171		CD02	tdTomato	-0.869734	0.0346996		tdTomato	-0.435162	0.0277789
RJ01	Juveniles	-0.399445	0.126855		Adults	-0.496645	0.0301642		CD02	tdTomato	-0.866876	0.0350156		tdTomato	-0.432753	0.0277703
RJ01	Juveniles	-0.397203	0.127971		Adults	-0.494343	0.0303139		CD02	tdTomato	-0.864019	0.0353333		tdTomato	-0.430344	0.0277656
RJ01	Juveniles	-0.394962	0.129092		Adults	-0.49204	0.0304664		CD02	tdTomato	-0.861161	0.0356529		tdTomato	-0.427935	0.0277647
RJ01	Juveniles	-0.392721	0.130216		Adults	-0.489738	0.0306216		CD02	tdTomato	-0.858304	0.0359742		tdTomato	-0.425525	0.0277678
RJ01	Juveniles	-0.39048	0.131345		Adults	-0.487436	0.0307796		CD02	tdTomato	-0.855446	0.0362973		tdTomato	-0.423116	0.0277749
RJ01	Juveniles	-0.388239	0.132478		Adults	-0.485133	0.0309403		CD02	tdTomato	-0.852589	0.0366221		tdTomato	-0.420707	0.0277862
RJ01	Juveniles	-0.385998	0.133614		Adults	-0.482831	0.0311038		CD02	tdTomato	-0.849731	0.0369488		tdTomato	-0.418298	0.0278017
RJ01	Juveniles	-0.383757	0.134755		Adults	-0.480529	0.0312702		CD02	tdTomato	-0.846874	0.0372773		tdTomato	-0.415888	0.0278216
RJ01	Juveniles	-0.381516	0.1359		Adults	-0.478226	0.0314394		CD02	tdTomato	-0.844016	0.0376076		tdTomato	-0.413479	0.0278458
RJ01	Juveniles	-0.379275	0.137049		Adults	-0.475924	0.0316115		CD02	tdTomato	-0.841159	0.0379396		tdTomato	-0.41107	0.0278745
RJ01	Juveniles	-0.377034	0.138202		Adults	-0.473622	0.0317865		CD02	tdTomato	-0.838301	0.0382735		tdTomato	-0.408661	0.0279077
RJ01	Juveniles	-0.374793	0.139359		Adults	-0.471319	0.0319644		CD02	tdTomato	-0.835443	0.0386092		tdTomato	-0.406251	0.0279456
RJ01	Juveniles	-0.372552	0.140519		Adults	-0.469017	0.0321452		CD02	tdTomato	-0.832586	0.0389467		tdTomato	-0.403842	0.0279882
RJ01	Juveniles	-0.370311	0.141684		Adults	-0.466715	0.032329		CD02	tdTomato	-0.829728	0.0392861		tdTomato	-0.401433	0.0280355
RJ01	Juveniles	-0.36807	0.142852		Adults	-0.464413	0.0325157		CD02	tdTomato	-0.826871	0.0396273		tdTomato	-0.399024	0.0280877
RJ01	Juveniles	-0.365829	0.144025		Adults	-0.46211	0.0327054		CD02	tdTomato	-0.824013	0.0399703		tdTomato	-0.396614	0.0281449
RJ01	Juveniles	-0.363587	0.145201		Adults	-0.459808	0.0328981		CD02	tdTomato	-0.821156	0.0403152		tdTomato	-0.394205	0.028207
RJ01	Juveniles	-0.361346	0.146381		Adults	-0.457506	0.0330938		CD02	tdTomato	-0.818298	0.0406619		tdTomato	-0.391796	0.0282743
RJ01	Juveniles	-0.359105	0.147565		Adults	-0.455203	0.0332926		CD02	tdTomato	-0.815441	0.0410105		tdTomato	-0.389387	0.0283467
RJ01	Juveniles	-0.356864	0.148752		Adults	-0.452901	0.0334944		CD02	tdTomato	-0.812583	0.0413609		tdTomato	-0.386977	0.0284243
RJ01	Juveniles	-0.354623	0.149943		Adults	-0.450599	0.0336992		CD02	tdTomato	-0.809726	0.0417132		tdTomato	-0.384568	0.0285072
RJ01	Juveniles	-0.352382	0.151138		Adults	-0.448296	0.033907		CD02	tdTomato	-0.806868	0.0420674		tdTomato	-0.382159	0.0285955
RJ01	Juveniles	-0.350141	0.152337		Adults	-0.445994	0.0341179		CD02	tdTomato	-0.804011	0.0424235		tdTomato	-0.37975	0.0286893
RJ01	Juveniles	-0.3479	0.15354		Adults	-0.443692	0.0343319		CD02	tdTomato	-0.801153	0.0427814		tdTomato	-0.37734	0.0287885
RJ01	Juveniles	-0.345659	0.154746		Adults	-0.441389	0.0345489		CD02	tdTomato	-0.798296	0.0431413		tdTomato	-0.374931	0.0288933
RJ01	Juveniles	-0.343418	0.155956		Adults	-0.439087	0.034769		CD02	tdTomato	-0.795438	0.043503		tdTomato	-0.372522	0.0290037
RJ01	Juveniles	-0.341177	0.157169		Adults	-0.436785	0.0349922		CD02	tdTomato	-0.79258	0.0438667		tdTomato	-0.370112	0.0291199
RJ01	Juveniles	-0.338936	0.158386		Adults	-0.434482	0.0352184		CD02	tdTomato	-0.789723	0.0442322		tdTomato	-0.367703	0.0292418
RJ01	Juveniles	-0.336695	0.159607		Adults	-0.43218	0.0354478		CD02	tdTomato	-0.786865	0.0445997		tdTomato	-0.365294	0.0293695
RJ01	Juveniles	-0.334454	0.160831		Adults	-0.429878	0.0356801		CD02	tdTomato	-0.784008	0.0449692		tdTomato	-0.362885	0.0295031
RJ01	Juveniles	-0.332213	0.162059		Adults	-0.427576	0.0359156		CD02	tdTomato	-0.78115	0.0453405		tdTomato	-0.360475	0.0296427
RJ01	Juveniles	-0.329972	0.163291		Adults	-0.425273	0.0361541		CD02	tdTomato	-0.778293	0.0457138		tdTomato	-0.358066	0.0297882
RJ01	Juveniles	-0.32773	0.164526		Adults	-0.422971	0.0363957		CD02	tdTomato	-0.775435	0.046089		tdTomato	-0.355657	0.0299398
RJ01	Juveniles	-0.325489	0.165765		Adults	-0.420669	0.0366404		CD02	tdTomato	-0.772578	0.0464662		tdTomato	-0.353248	0.0300976
RJ01	Juveniles	-0.323248	0.167007		Adults	-0.418366	0.0368881		CD02	tdTomato	-0.76972	0.0468454		tdTomato	-0.350838	0.0302615
RJ01	Juveniles	-0.321007	0.168253		Adults	-0.416064	0.0371388		CD02	tdTomato	-0.766863	0.0472265		tdTomato	-0.348429	0.0304316
RJ01	Juveniles	-0.318766	0.169503		Adults	-0.413762	0.0373926		CD02	tdTomato	-0.764005	0.0476097		tdTomato	-0.34602	0.030608
RJ01	Juveniles	-0.316525	0.170756		Adults	-0.411459	0.0376494		CD02	tdTomato	-0.761148	0.0479948		tdTomato	-0.343611	0.0307908
RJ01	Juveniles	-0.314284	0.172012		Adults	-0.409157	0.0379093		CD02	tdTomato	-0.75829	0.0483819		tdTomato	-0.341201	0.0309799
RJ01	Juveniles	-0.312043	0.173272		Adults	-0.406855	0.0381722		CD02	tdTomato	-0.755433	0.048771		tdTomato	-0.338792	0.0311755
RJ01	Juveniles	-0.309802	0.174536		Adults	-0.404552	0.038438		CD02	tdTomato	-0.752575	0.0491621		tdTomato	-0.336383	0.0313775
RJ01	Juveniles	-0.307561	0.175803		Adults	-0.40225	0.0387069		CD02	tdTomato	-0.749718	0.0495552		tdTomato	-0.333974	0.0315861
RJ01	Juveniles	-0.30532	0.177074		Adults	-0.399948	0.0389788		CD02	tdTomato	-0.74686	0.0499503		tdTomato	-0.331564	0.0318012
RJ01	Juveniles	-0.303079	0.178348		Adults	-0.397645	0.0392537		CD02	tdTomato	-0.744002	0.0503475		tdTomato	-0.329155	0.0320229
RJ01	Juveniles	-0.300838	0.179625		Adults	-0.395343	0.0395315		CD02	tdTomato	-0.741145	0.0507467		tdTomato	-0.326746	0.0322513
RJ01	Juveniles	-0.298597	0.180907		Adults	-0.393041	0.0398124		CD02	tdTomato	-0.738287	0.051148		tdTomato	-0.324337	0.0324864
RJ01	Juveniles	-0.296356	0.182191		Adults	-0.390739	0.0400962		CD02	tdTomato	-0.73543	0.0515513		tdTomato	-0.321927	0.0327283
RJ01	Juveniles	-0.294114	0.18348		Adults	-0.388436	0.0403829		CD02	tdTomato	-0.732572	0.0519567		tdTomato	-0.319518	0.0329769
RJ01	Juveniles	-0.291873	0.184772		Adults	-0.386134	0.0406726		CD02	tdTomato	-0.729715	0.0523642		tdTomato	-0.317109	0.0332324
RJ01	Juveniles	-0.289632	0.186067		Adults	-0.383832	0.0409653		CD02	tdTomato	-0.726857	0.0527738		tdTomato	-0.3147	0.0334946
RJ01	Juveniles	-0.287391	0.187366		Adults	-0.381529	0.0412608		CD02	tdTomato	-0.724	0.0531854		tdTomato	-0.31229	0.0337638
RJ01	Juveniles	-0.28515	0.188668		Adults	-0.379227	0.0415593		CD02	tdTomato	-0.721142	0.0535991		tdTomato	-0.309881	0.0340399
RJ01	Juveniles	-0.282909	0.189974		Adults	-0.376925	0.0418608		CD02	tdTomato	-0.718285	0.054015		tdTomato	-0.307472	0.034323
RJ01	Juveniles	-0.280668	0.191284		Adults	-0.374622	0.0421652		CD02	tdTomato	-0.715427	0.0544329		tdTomato	-0.305062	0.034613
RJ01	Juveniles	-0.278427	0.192597		Adults	-0.37232	0.0424725		CD02	tdTomato	-0.71257	0.054853		tdTomato	-0.302653	0.0349101
RJ01	Juveniles	-0.276186	0.193913		Adults	-0.370018	0.0427827		CD02	tdTomato	-0.709712	0.0552752		tdTomato	-0.300244	0.0352142
RJ01	Juveniles	-0.273945	0.195233		Adults	-0.367715	0.0430959		CD02	tdTomato	-0.706855	0.0556996		tdTomato	-0.297835	0.0355253
RJ01	Juveniles	-0.271704	0.196557		Adults	-0.365413	0.043412		CD02	tdTomato	-0.703997	0.0561261		tdTomato	-0.295425	0.0358436
RJ01	Juveniles	-0.269463	0.197885		Adults	-0.363111	0.043731		CD02	tdTomato	-0.701139	0.0565547		tdTomato	-0.293016	0.036169
RJ01	Juveniles	-0.267222	0.199215		Adults	-0.360808	0.0440529		CD02	tdTomato	-0.698282	0.0569855		tdTomato	-0.290607	0.0365015
RJ01	Juveniles	-0.264981	0.20055		Adults	-0.358506	0.0443779		CD02	tdTomato	-0.695424	0.0574185		tdTomato	-0.288198	0.0368412
RJ01	Juveniles	-0.26274	0.201888		Adults	-0.356204	0.0447057		CD02	tdTomato	-0.692567	0.0578537		tdTomato	-0.285788	0.037188
RJ01	Juveniles	-0.260498	0.20323		Adults	-0.353902	0.0450366		CD02	tdTomato	-0.689709	0.058291		tdTomato	-0.283379	0.0375421
RJ01	Juveniles	-0.258257	0.204575		Adults	-0.351599	0.0453704		CD02	tdTomato	-0.686852	0.0587306		tdTomato	-0.28097	0.0379034
RJ01	Juveniles	-0.256016	0.205924		Adults	-0.349297	0.0457072		CD02	tdTomato	-0.683994	0.0591723		tdTomato	-0.278561	0.038272
RJ01	Juveniles	-0.253775	0.207277		Adults	-0.346995	0.0460471		CD02	tdTomato	-0.681137	0.0596163		tdTomato	-0.276151	0.0386478
RJ01	Juveniles	-0.251534	0.208633		Adults	-0.344692	0.04639		CD02	tdTomato	-0.678279	0.0600625		tdTomato	-0.273742	0.0390308
RJ01	Juveniles	-0.249293	0.209993		Adults	-0.34239	0.0467359		CD02	tdTomato	-0.675422	0.0605109		tdTomato	-0.271333	0.0394212
RJ01	Juveniles	-0.247052	0.211357		Adults	-0.340088	0.047085		CD02	tdTomato	-0.672564	0.0609616		tdTomato	-0.268924	0.0398189
RJ01	Juveniles	-0.244811	0.212725		Adults	-0.337785	0.0474371		CD02	tdTomato	-0.669707	0.0614144		tdTomato	-0.266514	0.0402238
RJ01	Juveniles	-0.24257	0.214096		Adults	-0.335483	0.0477924		CD02	tdTomato	-0.666849	0.0618696		tdTomato	-0.264105	0.0406361
RJ01	Juveniles	-0.240329	0.215471		Adults	-0.333181	0.0481509		CD02	tdTomato	-0.663992	0.062327		tdTomato	-0.261696	0.0410557
RJ01	Juveniles	-0.238088	0.21685		Adults	-0.330878	0.0485126		CD02	tdTomato	-0.661134	0.0627866		tdTomato	-0.259287	0.0414827
RJ01	Juveniles	-0.235847	0.218232		Adults	-0.328576	0.0488775		CD02	tdTomato	-0.658277	0.0632486		tdTomato	-0.256877	0.0419169
RJ01	Juveniles	-0.233606	0.219619		Adults	-0.326274	0.0492457		CD02	tdTomato	-0.655419	0.0637128		tdTomato	-0.254468	0.0423586
RJ01	Juveniles	-0.231365	0.221009		Adults	-0.323971	0.0496173		CD02	tdTomato	-0.652561	0.0641793		tdTomato	-0.252059	0.0428076
RJ01	Juveniles	-0.229124	0.222403		Adults	-0.321669	0.0499923		CD02	tdTomato	-0.649704	0.0646481		tdTomato	-0.24965	0.0432639
RJ01	Juveniles	-0.226882	0.223801		Adults	-0.319367	0.0503706		CD02	tdTomato	-0.646846	0.0651192		tdTomato	-0.24724	0.0437276
RJ01	Juveniles	-0.224641	0.225203		Adults	-0.317064	0.0507525		CD02	tdTomato	-0.643989	0.0655926		tdTomato	-0.244831	0.0441987
RJ01	Juveniles	-0.2224	0.226609		Adults	-0.314762	0.0511379		CD02	tdTomato	-0.641131	0.0660683		tdTomato	-0.242422	0.0446771
RJ01	Juveniles	-0.220159	0.228019		Adults	-0.31246	0.0515269		CD02	tdTomato	-0.638274	0.0665463		tdTomato	-0.240012	0.0451629
RJ01	Juveniles	-0.217918	0.229432		Adults	-0.310158	0.0519196		CD02	tdTomato	-0.635416	0.0670266		tdTomato	-0.237603	0.045656
RJ01	Juveniles	-0.215677	0.23085		Adults	-0.307855	0.0523159		CD02	tdTomato	-0.632559	0.0675093		tdTomato	-0.235194	0.0461565
RJ01	Juveniles	-0.213436	0.232271		Adults	-0.305553	0.0527161		CD02	tdTomato	-0.629701	0.0679944		tdTomato	-0.232785	0.0466644
RJ01	Juveniles	-0.211195	0.233697		Adults	-0.303251	0.0531201		CD02	tdTomato	-0.626844	0.0684817		tdTomato	-0.230375	0.0471796
RJ01	Juveniles	-0.208954	0.235127		Adults	-0.300948	0.053528		CD02	tdTomato	-0.623986	0.0689714		tdTomato	-0.227966	0.0477022
RJ01	Juveniles	-0.206713	0.23656		Adults	-0.298646	0.05394		CD02	tdTomato	-0.621129	0.0694635		tdTomato	-0.225557	0.0482322
RJ01	Juveniles	-0.204472	0.237998		Adults	-0.296344	0.054356		CD02	tdTomato	-0.618271	0.0699579		tdTomato	-0.223148	0.0487695
RJ01	Juveniles	-0.202231	0.23944		Adults	-0.294041	0.0547762		CD02	tdTomato	-0.615414	0.0704547		tdTomato	-0.220738	0.0493141
RJ01	Juveniles	-0.19999	0.240886		Adults	-0.291739	0.0552006		CD02	tdTomato	-0.612556	0.0709538		tdTomato	-0.218329	0.0498661
RJ01	Juveniles	-0.197749	0.242337		Adults	-0.289437	0.0556293		CD02	tdTomato	-0.609698	0.0714554		tdTomato	-0.21592	0.0504254
RJ01	Juveniles	-0.195508	0.243791		Adults	-0.287134	0.0560625		CD02	tdTomato	-0.606841	0.0719593		tdTomato	-0.213511	0.050992
RJ01	Juveniles	-0.193266	0.245249		Adults	-0.284832	0.0565001		CD02	tdTomato	-0.603983	0.0724655		tdTomato	-0.211101	0.051566
RJ01	Juveniles	-0.191025	0.246712		Adults	-0.28253	0.0569423		CD02	tdTomato	-0.601126	0.0729742		tdTomato	-0.208692	0.0521472
RJ01	Juveniles	-0.188784	0.248179		Adults	-0.280227	0.0573892		CD02	tdTomato	-0.598268	0.0734852		tdTomato	-0.206283	0.0527358
RJ01	Juveniles	-0.186543	0.249651		Adults	-0.277925	0.0578409		CD02	tdTomato	-0.595411	0.0739987		tdTomato	-0.203874	0.0533317
RJ01	Juveniles	-0.184302	0.251126		Adults	-0.275623	0.0582974		CD02	tdTomato	-0.592553	0.0745145		tdTomato	-0.201464	0.0539349
RJ01	Juveniles	-0.182061	0.252606		Adults	-0.273321	0.0587589		CD02	tdTomato	-0.589696	0.0750327		tdTomato	-0.199055	0.0545454
RJ01	Juveniles	-0.17982	0.25409		Adults	-0.271018	0.0592254		CD02	tdTomato	-0.586838	0.0755533		tdTomato	-0.196646	0.0551632
RJ01	Juveniles	-0.177579	0.255579		Adults	-0.268716	0.0596971		CD02	tdTomato	-0.583981	0.0760763		tdTomato	-0.194237	0.0557882
RJ01	Juveniles	-0.175338	0.257072		Adults	-0.266414	0.0601741		CD02	tdTomato	-0.581123	0.0766017		tdTomato	-0.191827	0.0564206
RJ01	Juveniles	-0.173097	0.258569		Adults	-0.264111	0.0606564		CD02	tdTomato	-0.578266	0.0771295		tdTomato	-0.189418	0.0570602
RJ01	Juveniles	-0.170856	0.260071		Adults	-0.261809	0.0611442		CD02	tdTomato	-0.575408	0.0776597		tdTomato	-0.187009	0.057707
RJ01	Juveniles	-0.168615	0.261577		Adults	-0.259507	0.0616376		CD02	tdTomato	-0.572551	0.0781924		tdTomato	-0.1846	0.0583612
RJ01	Juveniles	-0.166374	0.263088		Adults	-0.257204	0.0621366		CD02	tdTomato	-0.569693	0.0787274		tdTomato	-0.18219	0.0590226
RJ01	Juveniles	-0.164133	0.264603		Adults	-0.254902	0.0626414		CD02	tdTomato	-0.566835	0.0792648		tdTomato	-0.179781	0.0596912
RJ01	Juveniles	-0.161892	0.266123		Adults	-0.2526	0.0631521		CD02	tdTomato	-0.563978	0.0798046		tdTomato	-0.177372	0.0603671
RJ01	Juveniles	-0.15965	0.267647		Adults	-0.250297	0.0636688		CD02	tdTomato	-0.56112	0.0803468		tdTomato	-0.174962	0.0610502
RJ01	Juveniles	-0.157409	0.269176		Adults	-0.247995	0.0641916		CD02	tdTomato	-0.558263	0.0808914		tdTomato	-0.172553	0.0617406
RJ01	Juveniles	-0.155168	0.270709		Adults	-0.245693	0.0647205		CD02	tdTomato	-0.555405	0.0814384		tdTomato	-0.170144	0.0624383
RJ01	Juveniles	-0.152927	0.272247		Adults	-0.24339	0.0652558		CD02	tdTomato	-0.552548	0.0819878		tdTomato	-0.167735	0.0631432
RJ01	Juveniles	-0.150686	0.273789		Adults	-0.241088	0.0657974		CD02	tdTomato	-0.54969	0.0825396		tdTomato	-0.165325	0.0638553
RJ01	Juveniles	-0.148445	0.275336		Adults	-0.238786	0.0663455		CD02	tdTomato	-0.546833	0.0830938		tdTomato	-0.162916	0.0645746
RJ01	Juveniles	-0.146204	0.276888		Adults	-0.236484	0.0669003		CD02	tdTomato	-0.543975	0.0836504		tdTomato	-0.160507	0.0653013
RJ01	Juveniles	-0.143963	0.278444		Adults	-0.234181	0.0674617		CD02	tdTomato	-0.541118	0.0842093		tdTomato	-0.158098	0.0660351
RJ01	Juveniles	-0.141722	0.280005		Adults	-0.231879	0.0680299		CD02	tdTomato	-0.53826	0.0847707		tdTomato	-0.155688	0.0667763
RJ01	Juveniles	-0.139481	0.28157		Adults	-0.229577	0.068605		CD02	tdTomato	-0.535403	0.0853344		tdTomato	-0.153279	0.0675246
RJ01	Juveniles	-0.13724	0.283141		Adults	-0.227274	0.0691871		CD02	tdTomato	-0.532545	0.0859005		tdTomato	-0.15087	0.0682803
RJ01	Juveniles	-0.134999	0.284715		Adults	-0.224972	0.0697762		CD02	tdTomato	-0.529688	0.0864689		tdTomato	-0.148461	0.0690432
RJ01	Juveniles	-0.132758	0.286295		Adults	-0.22267	0.0703725		CD02	tdTomato	-0.52683	0.0870397		tdTomato	-0.146051	0.0698134
RJ01	Juveniles	-0.130517	0.287879		Adults	-0.220367	0.070976		CD02	tdTomato	-0.523973	0.0876128		tdTomato	-0.143642	0.0705909
RJ01	Juveniles	-0.128276	0.289468		Adults	-0.218065	0.0715869		CD02	tdTomato	-0.521115	0.0881883		tdTomato	-0.141233	0.0713756
RJ01	Juveniles	-0.126034	0.291062		Adults	-0.215763	0.0722051		CD02	tdTomato	-0.518257	0.0887661		tdTomato	-0.138824	0.0721677
RJ01	Juveniles	-0.123793	0.29266		Adults	-0.21346	0.0728309		CD02	tdTomato	-0.5154	0.0893463		tdTomato	-0.136414	0.0729671
RJ01	Juveniles	-0.121552	0.294263		Adults	-0.211158	0.0734642		CD02	tdTomato	-0.512542	0.0899288		tdTomato	-0.134005	0.0737739
RJ01	Juveniles	-0.119311	0.295871		Adults	-0.208856	0.0741051		CD02	tdTomato	-0.509685	0.0905136		tdTomato	-0.131596	0.074588
RJ01	Juveniles	-0.11707	0.297483		Adults	-0.206553	0.0747537		CD02	tdTomato	-0.506827	0.0911007		tdTomato	-0.129187	0.0754094
RJ01	Juveniles	-0.114829	0.2991		Adults	-0.204251	0.0754101		CD02	tdTomato	-0.50397	0.09169		tdTomato	-0.126777	0.0762383
RJ01	Juveniles	-0.112588	0.300722		Adults	-0.201949	0.0760742		CD02	tdTomato	-0.501112	0.0922817		tdTomato	-0.124368	0.0770745
RJ01	Juveniles	-0.110347	0.302349		Adults	-0.199647	0.0767463		CD02	tdTomato	-0.498255	0.0928757		tdTomato	-0.121959	0.0779182
RJ01	Juveniles	-0.108106	0.30398		Adults	-0.197344	0.0774262		CD02	tdTomato	-0.495397	0.0934719		tdTomato	-0.11955	0.0787693
RJ01	Juveniles	-0.105865	0.305616		Adults	-0.195042	0.0781141		CD02	tdTomato	-0.49254	0.0940703		tdTomato	-0.11714	0.0796279
RJ01	Juveniles	-0.103624	0.307256		Adults	-0.19274	0.07881		CD02	tdTomato	-0.489682	0.094671		tdTomato	-0.114731	0.080494
RJ01	Juveniles	-0.101383	0.308902		Adults	-0.190437	0.079514		CD02	tdTomato	-0.486825	0.0952739		tdTomato	-0.112322	0.0813676
RJ01	Juveniles	-0.0991417	0.310551		Adults	-0.188135	0.080226		CD02	tdTomato	-0.483967	0.095879		tdTomato	-0.109913	0.0822488
RJ01	Juveniles	-0.0969006	0.312206		Adults	-0.185833	0.0809461		CD02	tdTomato	-0.48111	0.0964863		tdTomato	-0.107503	0.0831375
RJ01	Juveniles	-0.0946596	0.313865		Adults	-0.18353	0.0816743		CD02	tdTomato	-0.478252	0.0970958		tdTomato	-0.105094	0.0840338
RJ01	Juveniles	-0.0924185	0.315529		Adults	-0.181228	0.0824106		CD02	tdTomato	-0.475394	0.0977075		tdTomato	-0.102685	0.0849378
RJ01	Juveniles	-0.0901774	0.317197		Adults	-0.178926	0.0831551		CD02	tdTomato	-0.472537	0.0983213		tdTomato	-0.100275	0.0858494
RJ01	Juveniles	-0.0879364	0.31887		Adults	-0.176623	0.0839078		CD02	tdTomato	-0.469679	0.0989373		tdTomato	-0.0978662	0.0867688
RJ01	Juveniles	-0.0856953	0.320548		Adults	-0.174321	0.0846685		CD02	tdTomato	-0.466822	0.0995554		tdTomato	-0.0954569	0.0876958
RJ01	Juveniles	-0.0834542	0.32223		Adults	-0.172019	0.0854375		CD02	tdTomato	-0.463964	0.100176		tdTomato	-0.0930477	0.0886307
RJ01	Juveniles	-0.0812132	0.323917		Adults	-0.169716	0.0862145		CD02	tdTomato	-0.461107	0.100798		tdTomato	-0.0906384	0.0895733
RJ01	Juveniles	-0.0789721	0.325608		Adults	-0.167414	0.0869997		CD02	tdTomato	-0.458249	0.101422		tdTomato	-0.0882292	0.0905238
RJ01	Juveniles	-0.076731	0.327303		Adults	-0.165112	0.0877929		CD02	tdTomato	-0.455392	0.102048		tdTomato	-0.0858199	0.0914822
RJ01	Juveniles	-0.07449	0.329003		Adults	-0.16281	0.0885942		CD02	tdTomato	-0.452534	0.102677		tdTomato	-0.0834107	0.0924485
RJ01	Juveniles	-0.0722489	0.330707		Adults	-0.160507	0.0894035		CD02	tdTomato	-0.449677	0.103307		tdTomato	-0.0810014	0.0934228
RJ01	Juveniles	-0.0700078	0.332416		Adults	-0.158205	0.0902208		CD02	tdTomato	-0.446819	0.10394		tdTomato	-0.0785921	0.094405
RJ01	Juveniles	-0.0677668	0.334129		Adults	-0.155903	0.0910461		CD02	tdTomato	-0.443962	0.104574		tdTomato	-0.0761829	0.0953954
RJ01	Juveniles	-0.0655257	0.335846		Adults	-0.1536	0.0918792		CD02	tdTomato	-0.441104	0.10521		tdTomato	-0.0737736	0.0963938
RJ01	Juveniles	-0.0632846	0.337568		Adults	-0.151298	0.0927202		CD02	tdTomato	-0.438247	0.105849		tdTomato	-0.0713644	0.0974003
RJ01	Juveniles	-0.0610436	0.339293		Adults	-0.148996	0.093569		CD02	tdTomato	-0.435389	0.106489		tdTomato	-0.0689551	0.0984151
RJ01	Juveniles	-0.0588025	0.341023		Adults	-0.146693	0.0944254		CD02	tdTomato	-0.432532	0.107131		tdTomato	-0.0665458	0.099438
RJ01	Juveniles	-0.0565614	0.342757		Adults	-0.144391	0.0952895		CD02	tdTomato	-0.429674	0.107775		tdTomato	-0.0641366	0.100469
RJ01	Juveniles	-0.0543204	0.344495		Adults	-0.142089	0.0961611		CD02	tdTomato	-0.426816	0.10842		tdTomato	-0.0617273	0.101509
RJ01	Juveniles	-0.0520793	0.346237		Adults	-0.139786	0.0970402		CD02	tdTomato	-0.423959	0.109068		tdTomato	-0.0593181	0.102557
RJ01	Juveniles	-0.0498382	0.347982		Adults	-0.137484	0.0979267		CD02	tdTomato	-0.421101	0.109717		tdTomato	-0.0569088	0.103613
RJ01	Juveniles	-0.0475972	0.349732		Adults	-0.135182	0.0988204		CD02	tdTomato	-0.418244	0.110368		tdTomato	-0.0544995	0.104678
RJ01	Juveniles	-0.0453561	0.351485		Adults	-0.132879	0.0997214		CD02	tdTomato	-0.415386	0.111021		tdTomato	-0.0520903	0.105751
RJ01	Juveniles	-0.043115	0.353243		Adults	-0.130577	0.100629		CD02	tdTomato	-0.412529	0.111675		tdTomato	-0.049681	0.106833
RJ01	Juveniles	-0.040874	0.355004		Adults	-0.128275	0.101544		CD02	tdTomato	-0.409671	0.112331		tdTomato	-0.0472718	0.107924
RJ01	Juveniles	-0.0386329	0.356768		Adults	-0.125972	0.102466		CD02	tdTomato	-0.406814	0.112989		tdTomato	-0.0448625	0.109023
RJ01	Juveniles	-0.0363918	0.358536		Adults	-0.12367	0.103395		CD02	tdTomato	-0.403956	0.113649		tdTomato	-0.0424533	0.110131
RJ01	Juveniles	-0.0341508	0.360307		Adults	-0.121368	0.10433		CD02	tdTomato	-0.401099	0.11431		tdTomato	-0.040044	0.111247
RJ01	Juveniles	-0.0319097	0.362082		Adults	-0.119066	0.105272		CD02	tdTomato	-0.398241	0.114972		tdTomato	-0.0376347	0.112372
RJ01	Juveniles	-0.0296686	0.36386		Adults	-0.116763	0.10622		CD02	tdTomato	-0.395384	0.115636		tdTomato	-0.0352255	0.113507
RJ01	Juveniles	-0.0274276	0.365642		Adults	-0.114461	0.107174		CD02	tdTomato	-0.392526	0.116302		tdTomato	-0.0328162	0.11465
RJ01	Juveniles	-0.0251865	0.367426		Adults	-0.112159	0.108134		CD02	tdTomato	-0.389669	0.116969		tdTomato	-0.030407	0.115802
RJ01	Juveniles	-0.0229454	0.369214		Adults	-0.109856	0.1091		CD02	tdTomato	-0.386811	0.117637		tdTomato	-0.0279977	0.116963
RJ01	Juveniles	-0.0207044	0.371005		Adults	-0.107554	0.110072		CD02	tdTomato	-0.383953	0.118307		tdTomato	-0.0255884	0.118133
RJ01	Juveniles	-0.0184633	0.372798		Adults	-0.105252	0.11105		CD02	tdTomato	-0.381096	0.118978		tdTomato	-0.0231792	0.119312
RJ01	Juveniles	-0.0162222	0.374594		Adults	-0.102949	0.112033		CD02	tdTomato	-0.378238	0.119651		tdTomato	-0.0207699	0.1205
RJ01	Juveniles	-0.0139812	0.376393		Adults	-0.100647	0.113022		CD02	tdTomato	-0.375381	0.120324		tdTomato	-0.0183607	0.121697
RJ01	Juveniles	-0.0117401	0.378194		Adults	-0.0983447	0.114016		CD02	tdTomato	-0.372523	0.121		tdTomato	-0.0159514	0.122904
RJ01	Juveniles	-0.00949904	0.379998		Adults	-0.0960424	0.115014		CD02	tdTomato	-0.369666	0.121676		tdTomato	-0.0135421	0.124119
RJ01	Juveniles	-0.00725798	0.381805		Adults	-0.0937401	0.116018		CD02	tdTomato	-0.366808	0.122353		tdTomato	-0.0111329	0.125344
RJ01	Juveniles	-0.00501691	0.383613		Adults	-0.0914378	0.117026		CD02	tdTomato	-0.363951	0.123032		tdTomato	-0.00872363	0.126578
RJ01	Juveniles	-0.00277584	0.385424		Adults	-0.0891355	0.118039		CD02	tdTomato	-0.361093	0.123712		tdTomato	-0.00631437	0.127822
RJ01	Juveniles	-0.000534778	0.387237		Adults	-0.0868332	0.119056		CD02	tdTomato	-0.358236	0.124393		tdTomato	-0.00390511	0.129074
RJ01	Juveniles	0.00170629	0.389052		Adults	-0.0845309	0.120078		CD02	tdTomato	-0.355378	0.125075		tdTomato	-0.00149585	0.130336
RJ01	Juveniles	0.00394735	0.390868		Adults	-0.0822285	0.121103		CD02	tdTomato	-0.352521	0.125757		tdTomato	0.00091341	0.131608
RJ01	Juveniles	0.00618842	0.392686		Adults	-0.0799262	0.122133		CD02	tdTomato	-0.349663	0.126441		tdTomato	0.00332267	0.132889
RJ01	Juveniles	0.00842949	0.394506		Adults	-0.0776239	0.123166		CD02	tdTomato	-0.346806	0.127126		tdTomato	0.00573193	0.134179
RJ01	Juveniles	0.0106706	0.396327		Adults	-0.0753216	0.124202		CD02	tdTomato	-0.343948	0.127812		tdTomato	0.00814119	0.135479
RJ01	Juveniles	0.0129116	0.39815		Adults	-0.0730193	0.125243		CD02	tdTomato	-0.34109	0.128498		tdTomato	0.0105504	0.136788
RJ01	Juveniles	0.0151527	0.399974		Adults	-0.070717	0.126286		CD02	tdTomato	-0.338233	0.129186		tdTomato	0.0129597	0.138106
RJ01	Juveniles	0.0173938	0.401798		Adults	-0.0684147	0.127332		CD02	tdTomato	-0.335375	0.129874		tdTomato	0.015369	0.139435
RJ01	Juveniles	0.0196348	0.403624		Adults	-0.0661124	0.128382		CD02	tdTomato	-0.332518	0.130563		tdTomato	0.0177782	0.140772
RJ01	Juveniles	0.0218759	0.405451		Adults	-0.06381	0.129434		CD02	tdTomato	-0.32966	0.131252		tdTomato	0.0201875	0.142119
RJ01	Juveniles	0.0241169	0.407278		Adults	-0.0615077	0.130488		CD02	tdTomato	-0.326803	0.131942		tdTomato	0.0225967	0.143475
RJ01	Juveniles	0.026358	0.409105		Adults	-0.0592054	0.131545		CD02	tdTomato	-0.323945	0.132633		tdTomato	0.025006	0.144841
RJ01	Juveniles	0.0285991	0.410933		Adults	-0.0569031	0.132605		CD02	tdTomato	-0.321088	0.133325		tdTomato	0.0274153	0.146217
RJ01	Juveniles	0.0308401	0.412761		Adults	-0.0546008	0.133666		CD02	tdTomato	-0.31823	0.134017		tdTomato	0.0298245	0.147602
RJ01	Juveniles	0.0330812	0.414589		Adults	-0.0522985	0.13473		CD02	tdTomato	-0.315373	0.134709		tdTomato	0.0322338	0.148996
RJ01	Juveniles	0.0353223	0.416417		Adults	-0.0499962	0.135795		CD02	tdTomato	-0.312515	0.135402		tdTomato	0.034643	0.150399
RJ01	Juveniles	0.0375633	0.418245		Adults	-0.0476938	0.136863		CD02	tdTomato	-0.309658	0.136095		tdTomato	0.0370523	0.151812
RJ01	Juveniles	0.0398044	0.420072		Adults	-0.0453915	0.137931		CD02	tdTomato	-0.3068	0.136789		tdTomato	0.0394616	0.153235
RJ01	Juveniles	0.0420455	0.421899		Adults	-0.0430892	0.139002		CD02	tdTomato	-0.303943	0.137483		tdTomato	0.0418708	0.154666
RJ01	Juveniles	0.0442865	0.423724		Adults	-0.0407869	0.140073		CD02	tdTomato	-0.301085	0.138177		tdTomato	0.0442801	0.156107
RJ01	Juveniles	0.0465276	0.425549		Adults	-0.0384846	0.141146		CD02	tdTomato	-0.298228	0.138871		tdTomato	0.0466893	0.157557
RJ01	Juveniles	0.0487687	0.427373		Adults	-0.0361823	0.14222		CD02	tdTomato	-0.29537	0.139566		tdTomato	0.0490986	0.159017
RJ01	Juveniles	0.0510097	0.429196		Adults	-0.03388	0.143295		CD02	tdTomato	-0.292512	0.14026		tdTomato	0.0515078	0.160485
RJ01	Juveniles	0.0532508	0.431017		Adults	-0.0315777	0.144371		CD02	tdTomato	-0.289655	0.140955		tdTomato	0.0539171	0.161963
RJ01	Juveniles	0.0554919	0.432836		Adults	-0.0292753	0.145447		CD02	tdTomato	-0.286797	0.14165		tdTomato	0.0563264	0.163449
RJ01	Juveniles	0.0577329	0.434654		Adults	-0.026973	0.146525		CD02	tdTomato	-0.28394	0.142345		tdTomato	0.0587356	0.164945
RJ01	Juveniles	0.059974	0.436469		Adults	-0.0246707	0.147603		CD02	tdTomato	-0.281082	0.14304		tdTomato	0.0611449	0.166449
RJ01	Juveniles	0.0622151	0.438282		Adults	-0.0223684	0.148681		CD02	tdTomato	-0.278225	0.143734		tdTomato	0.0635541	0.167962
RJ01	Juveniles	0.0644561	0.440093		Adults	-0.0200661	0.14976		CD02	tdTomato	-0.275367	0.144429		tdTomato	0.0659634	0.169484
RJ01	Juveniles	0.0666972	0.441902		Adults	-0.0177638	0.15084		CD02	tdTomato	-0.27251	0.145123		tdTomato	0.0683727	0.171015
RJ01	Juveniles	0.0689383	0.443708		Adults	-0.0154615	0.151919		CD02	tdTomato	-0.269652	0.145817		tdTomato	0.0707819	0.172554
RJ01	Juveniles	0.0711793	0.44551		Adults	-0.0131591	0.152999		CD02	tdTomato	-0.266795	0.146511		tdTomato	0.0731912	0.174102
RJ01	Juveniles	0.0734204	0.44731		Adults	-0.0108568	0.15408		CD02	tdTomato	-0.263937	0.147205		tdTomato	0.0756004	0.175658
RJ01	Juveniles	0.0756615	0.449106		Adults	-0.00855452	0.15516		CD02	tdTomato	-0.26108	0.147898		tdTomato	0.0780097	0.177223
RJ01	Juveniles	0.0779025	0.450899		Adults	-0.00625221	0.156241		CD02	tdTomato	-0.258222	0.148591		tdTomato	0.080419	0.178795
RJ01	Juveniles	0.0801436	0.452688		Adults	-0.0039499	0.157322		CD02	tdTomato	-0.255365	0.149283		tdTomato	0.0828282	0.180376
RJ01	Juveniles	0.0823847	0.454473		Adults	-0.00164758	0.158403		CD02	tdTomato	-0.252507	0.149975		tdTomato	0.0852375	0.181965
RJ01	Juveniles	0.0846257	0.456254		Adults	0.00065473	0.159484		CD02	tdTomato	-0.249649	0.150666		tdTomato	0.0876467	0.183562
RJ01	Juveniles	0.0868668	0.45803		Adults	0.00295704	0.160565		CD02	tdTomato	-0.246792	0.151357		tdTomato	0.090056	0.185166
RJ01	Juveniles	0.0891079	0.459802		Adults	0.00525936	0.161647		CD02	tdTomato	-0.243934	0.152047		tdTomato	0.0924653	0.186778
RJ01	Juveniles	0.0913489	0.46157		Adults	0.00756167	0.162728		CD02	tdTomato	-0.241077	0.152736		tdTomato	0.0948745	0.188397
RJ01	Juveniles	0.09359	0.463332		Adults	0.00986398	0.16381		CD02	tdTomato	-0.238219	0.153425		tdTomato	0.0972838	0.190024
RJ01	Juveniles	0.0958311	0.465089		Adults	0.0121663	0.164892		CD02	tdTomato	-0.235362	0.154113		tdTomato	0.099693	0.191658
RJ01	Juveniles	0.0980721	0.46684		Adults	0.0144686	0.165974		CD02	tdTomato	-0.232504	0.1548		tdTomato	0.102102	0.193299
RJ01	Juveniles	0.100313	0.468586		Adults	0.0167709	0.167057		CD02	tdTomato	-0.229647	0.155486		tdTomato	0.104512	0.194947
RJ01	Juveniles	0.102554	0.470327		Adults	0.0190732	0.16814		CD02	tdTomato	-0.226789	0.156172		tdTomato	0.106921	0.196602
RJ01	Juveniles	0.104795	0.472061		Adults	0.0213755	0.169223		CD02	tdTomato	-0.223932	0.156856		tdTomato	0.10933	0.198263
RJ01	Juveniles	0.107036	0.473789		Adults	0.0236779	0.170307		CD02	tdTomato	-0.221074	0.157539		tdTomato	0.111739	0.19993
RJ01	Juveniles	0.109277	0.47551		Adults	0.0259802	0.171392		CD02	tdTomato	-0.218217	0.158222		tdTomato	0.114149	0.201604
RJ01	Juveniles	0.111519	0.477224		Adults	0.0282825	0.172477		CD02	tdTomato	-0.215359	0.158903		tdTomato	0.116558	0.203284
RJ01	Juveniles	0.11376	0.478932		Adults	0.0305848	0.173563		CD02	tdTomato	-0.212502	0.159583		tdTomato	0.118967	0.20497
RJ01	Juveniles	0.116001	0.480633		Adults	0.0328871	0.174649		CD02	tdTomato	-0.209644	0.160262		tdTomato	0.121376	0.206662
RJ01	Juveniles	0.118242	0.482326		Adults	0.0351894	0.175737		CD02	tdTomato	-0.206787	0.16094		tdTomato	0.123786	0.208359
RJ01	Juveniles	0.120483	0.484011		Adults	0.0374917	0.176826		CD02	tdTomato	-0.203929	0.161616		tdTomato	0.126195	0.210061
RJ01	Juveniles	0.122724	0.485689		Adults	0.0397941	0.177916		CD02	tdTomato	-0.201071	0.162292		tdTomato	0.128604	0.211769
RJ01	Juveniles	0.124965	0.487358		Adults	0.0420964	0.179007		CD02	tdTomato	-0.198214	0.162966		tdTomato	0.131013	0.213482
RJ01	Juveniles	0.127206	0.489019		Adults	0.0443987	0.1801		CD02	tdTomato	-0.195356	0.163638		tdTomato	0.133423	0.215199
RJ01	Juveniles	0.129447	0.490672		Adults	0.046701	0.181195		CD02	tdTomato	-0.192499	0.164309		tdTomato	0.135832	0.216921
RJ01	Juveniles	0.131688	0.492316		Adults	0.0490033	0.182291		CD02	tdTomato	-0.189641	0.164979		tdTomato	0.138241	0.218647
RJ01	Juveniles	0.133929	0.493951		Adults	0.0513056	0.183389		CD02	tdTomato	-0.186784	0.165647		tdTomato	0.14065	0.220378
RJ01	Juveniles	0.13617	0.495577		Adults	0.0536079	0.18449		CD02	tdTomato	-0.183926	0.166314		tdTomato	0.14306	0.222112
RJ01	Juveniles	0.138411	0.497193		Adults	0.0559102	0.185592		CD02	tdTomato	-0.181069	0.166979		tdTomato	0.145469	0.22385
RJ01	Juveniles	0.140652	0.4988		Adults	0.0582126	0.186697		CD02	tdTomato	-0.178211	0.167642		tdTomato	0.147878	0.225591
RJ01	Juveniles	0.142893	0.500396		Adults	0.0605149	0.187805		CD02	tdTomato	-0.175354	0.168304		tdTomato	0.150287	0.227336
RJ01	Juveniles	0.145135	0.501983		Adults	0.0628172	0.188916		CD02	tdTomato	-0.172496	0.168964		tdTomato	0.152697	0.229084
RJ01	Juveniles	0.147376	0.503559		Adults	0.0651195	0.190029		CD02	tdTomato	-0.169639	0.169623		tdTomato	0.155106	0.230835
RJ01	Juveniles	0.149617	0.505124		Adults	0.0674218	0.191146		CD02	tdTomato	-0.166781	0.170279		tdTomato	0.157515	0.232588
RJ01	Juveniles	0.151858	0.506679		Adults	0.0697241	0.192266		CD02	tdTomato	-0.163924	0.170934		tdTomato	0.159925	0.234344
RJ01	Juveniles	0.154099	0.508223		Adults	0.0720264	0.19339		CD02	tdTomato	-0.161066	0.171587		tdTomato	0.162334	0.236102
RJ01	Juveniles	0.15634	0.509755		Adults	0.0743288	0.194518		CD02	tdTomato	-0.158208	0.172238		tdTomato	0.164743	0.237861
RJ01	Juveniles	0.158581	0.511276		Adults	0.0766311	0.195649		CD02	tdTomato	-0.155351	0.172888		tdTomato	0.167152	0.239623
RJ01	Juveniles	0.160822	0.512785		Adults	0.0789334	0.196785		CD02	tdTomato	-0.152493	0.173535		tdTomato	0.169562	0.241386
RJ01	Juveniles	0.163063	0.514282		Adults	0.0812357	0.197926		CD02	tdTomato	-0.149636	0.17418		tdTomato	0.171971	0.24315
RJ01	Juveniles	0.165304	0.515767		Adults	0.083538	0.199071		CD02	tdTomato	-0.146778	0.174824		tdTomato	0.17438	0.244914
RJ01	Juveniles	0.167545	0.517239		Adults	0.0858403	0.200221		CD02	tdTomato	-0.143921	0.175465		tdTomato	0.176789	0.24668
RJ01	Juveniles	0.169786	0.518699		Adults	0.0881426	0.201376		CD02	tdTomato	-0.141063	0.176104		tdTomato	0.179199	0.248446
RJ01	Juveniles	0.172027	0.520146		Adults	0.0904449	0.202537		CD02	tdTomato	-0.138206	0.176742		tdTomato	0.181608	0.250213
RJ01	Juveniles	0.174268	0.521579		Adults	0.0927473	0.203703		CD02	tdTomato	-0.135348	0.177377		tdTomato	0.184017	0.251979
RJ01	Juveniles	0.176509	0.523		Adults	0.0950496	0.204875		CD02	tdTomato	-0.132491	0.17801		tdTomato	0.186426	0.253745
RJ01	Juveniles	0.178751	0.524406		Adults	0.0973519	0.206053		CD02	tdTomato	-0.129633	0.178641		tdTomato	0.188836	0.255511
RJ01	Juveniles	0.180992	0.525799		Adults	0.0996542	0.207237		CD02	tdTomato	-0.126776	0.179269		tdTomato	0.191245	0.257276
RJ01	Juveniles	0.183233	0.527178		Adults	0.101957	0.208428		CD02	tdTomato	-0.123918	0.179896		tdTomato	0.193654	0.25904
RJ01	Juveniles	0.185474	0.528543		Adults	0.104259	0.209625		CD02	tdTomato	-0.121061	0.18052		tdTomato	0.196063	0.260803
RJ01	Juveniles	0.187715	0.529894		Adults	0.106561	0.21083		CD02	tdTomato	-0.118203	0.181142		tdTomato	0.198473	0.262564
RJ01	Juveniles	0.189956	0.531229		Adults	0.108863	0.212041		CD02	tdTomato	-0.115345	0.181761		tdTomato	0.200882	0.264324
RJ01	Juveniles	0.192197	0.53255		Adults	0.111166	0.21326		CD02	tdTomato	-0.112488	0.182379		tdTomato	0.203291	0.266081
RJ01	Juveniles	0.194438	0.533856		Adults	0.113468	0.214487		CD02	tdTomato	-0.10963	0.182994		tdTomato	0.2057	0.267837
RJ01	Juveniles	0.196679	0.535146		Adults	0.11577	0.215722		CD02	tdTomato	-0.106773	0.183606		tdTomato	0.20811	0.26959
RJ01	Juveniles	0.19892	0.536421		Adults	0.118073	0.216964		CD02	tdTomato	-0.103915	0.184217		tdTomato	0.210519	0.271341
RJ01	Juveniles	0.201161	0.53768		Adults	0.120375	0.218215		CD02	tdTomato	-0.101058	0.184824		tdTomato	0.212928	0.273088
RJ01	Juveniles	0.203402	0.538923		Adults	0.122677	0.219474		CD02	tdTomato	-0.0982003	0.18543		tdTomato	0.215337	0.274833
RJ01	Juveniles	0.205643	0.54015		Adults	0.12498	0.220742		CD02	tdTomato	-0.0953428	0.186033		tdTomato	0.217747	0.276574
RJ01	Juveniles	0.207884	0.541361		Adults	0.127282	0.222019		CD02	tdTomato	-0.0924852	0.186633		tdTomato	0.220156	0.278312
RJ01	Juveniles	0.210125	0.542555		Adults	0.129584	0.223305		CD02	tdTomato	-0.0896277	0.187232		tdTomato	0.222565	0.280046
RJ01	Juveniles	0.212367	0.543733		Adults	0.131887	0.2246		CD02	tdTomato	-0.0867702	0.187827		tdTomato	0.224974	0.281776
RJ01	Juveniles	0.214608	0.544893		Adults	0.134189	0.225904		CD02	tdTomato	-0.0839126	0.18842		tdTomato	0.227384	0.283502
RJ01	Juveniles	0.216849	0.546037		Adults	0.136491	0.227218		CD02	tdTomato	-0.0810551	0.189011		tdTomato	0.229793	0.285224
RJ01	Juveniles	0.21909	0.547163		Adults	0.138794	0.228542		CD02	tdTomato	-0.0781976	0.189599		tdTomato	0.232202	0.286941
RJ01	Juveniles	0.221331	0.548272		Adults	0.141096	0.229876		CD02	tdTomato	-0.0753401	0.190185		tdTomato	0.234612	0.288653
RJ01	Juveniles	0.223572	0.549363		Adults	0.143398	0.231219		CD02	tdTomato	-0.0724825	0.190768		tdTomato	0.237021	0.29036
RJ01	Juveniles	0.225813	0.550436		Adults	0.1457	0.232573		CD02	tdTomato	-0.069625	0.191349		tdTomato	0.23943	0.292062
RJ01	Juveniles	0.228054	0.551491		Adults	0.148003	0.233938		CD02	tdTomato	-0.0667675	0.191927		tdTomato	0.241839	0.293759
RJ01	Juveniles	0.230295	0.552528		Adults	0.150305	0.235312		CD02	tdTomato	-0.0639099	0.192502		tdTomato	0.244249	0.29545
RJ01	Juveniles	0.232536	0.553547		Adults	0.152607	0.236698		CD02	tdTomato	-0.0610524	0.193075		tdTomato	0.246658	0.297135
RJ01	Juveniles	0.234777	0.554547		Adults	0.15491	0.238094		CD02	tdTomato	-0.0581949	0.193646		tdTomato	0.249067	0.298814
RJ01	Juveniles	0.237018	0.555528		Adults	0.157212	0.2395		CD02	tdTomato	-0.0553373	0.194214		tdTomato	0.251476	0.300487
RJ01	Juveniles	0.239259	0.55649		Adults	0.159514	0.240918		CD02	tdTomato	-0.0524798	0.194779		tdTomato	0.253886	0.302154
RJ01	Juveniles	0.2415	0.557434		Adults	0.161817	0.242346		CD02	tdTomato	-0.0496223	0.195342		tdTomato	0.256295	0.303815
RJ01	Juveniles	0.243741	0.558358		Adults	0.164119	0.243786		CD02	tdTomato	-0.0467647	0.195902		tdTomato	0.258704	0.305469
RJ01	Juveniles	0.245983	0.559263		Adults	0.166421	0.245236		CD02	tdTomato	-0.0439072	0.19646		tdTomato	0.261113	0.307116
RJ01	Juveniles	0.248224	0.560148		Adults	0.168724	0.246698		CD02	tdTomato	-0.0410497	0.197015		tdTomato	0.263523	0.308756
RJ01	Juveniles	0.250465	0.561014		Adults	0.171026	0.248171		CD02	tdTomato	-0.0381921	0.197568		tdTomato	0.265932	0.310389
RJ01	Juveniles	0.252706	0.56186		Adults	0.173328	0.249655		CD02	tdTomato	-0.0353346	0.198118		tdTomato	0.268341	0.312016
RJ01	Juveniles	0.254947	0.562685		Adults	0.175631	0.25115		CD02	tdTomato	-0.0324771	0.198666		tdTomato	0.27075	0.313634
RJ01	Juveniles	0.257188	0.563491		Adults	0.177933	0.252656		CD02	tdTomato	-0.0296195	0.199211		tdTomato	0.27316	0.315246
RJ01	Juveniles	0.259429	0.564277		Adults	0.180235	0.254174		CD02	tdTomato	-0.026762	0.199753		tdTomato	0.275569	0.31685
RJ01	Juveniles	0.26167	0.565043		Adults	0.182537	0.255702		CD02	tdTomato	-0.0239045	0.200293		tdTomato	0.277978	0.318446
RJ01	Juveniles	0.263911	0.565788		Adults	0.18484	0.257242		CD02	tdTomato	-0.0210469	0.200831		tdTomato	0.280387	0.320034
RJ01	Juveniles	0.266152	0.566512		Adults	0.187142	0.258792		CD02	tdTomato	-0.0181894	0.201366		tdTomato	0.282797	0.321615
RJ01	Juveniles	0.268393	0.567216		Adults	0.189444	0.260354		CD02	tdTomato	-0.0153319	0.201899		tdTomato	0.285206	0.323187
RJ01	Juveniles	0.270634	0.567899		Adults	0.191747	0.261926		CD02	tdTomato	-0.0124744	0.202429		tdTomato	0.287615	0.324752
RJ01	Juveniles	0.272875	0.568561		Adults	0.194049	0.263509		CD02	tdTomato	-0.00961682	0.202957		tdTomato	0.290024	0.326308
RJ01	Juveniles	0.275116	0.569202		Adults	0.196351	0.265103		CD02	tdTomato	-0.00675929	0.203482		tdTomato	0.292434	0.327857
RJ01	Juveniles	0.277357	0.569822		Adults	0.198654	0.266707		CD02	tdTomato	-0.00390176	0.204005		tdTomato	0.294843	0.329397
RJ01	Juveniles	0.279598	0.57042		Adults	0.200956	0.268321		CD02	tdTomato	-0.00104423	0.204526		tdTomato	0.297252	0.330929
RJ01	Juveniles	0.28184	0.570998		Adults	0.203258	0.269946		CD02	tdTomato	0.0018133	0.205044		tdTomato	0.299662	0.332452
RJ01	Juveniles	0.284081	0.571554		Adults	0.205561	0.271581		CD02	tdTomato	0.00467084	0.20556		tdTomato	0.302071	0.333967
RJ01	Juveniles	0.286322	0.572089		Adults	0.207863	0.273226		CD02	tdTomato	0.00752837	0.206073		tdTomato	0.30448	0.335474
RJ01	Juveniles	0.288563	0.572602		Adults	0.210165	0.27488		CD02	tdTomato	0.0103859	0.206585		tdTomato	0.306889	0.336972
RJ01	Juveniles	0.290804	0.573093		Adults	0.212468	0.276544		CD02	tdTomato	0.0132434	0.207094		tdTomato	0.309299	0.338462
RJ01	Juveniles	0.293045	0.573563		Adults	0.21477	0.278217		CD02	tdTomato	0.016101	0.207601		tdTomato	0.311708	0.339943
RJ01	Juveniles	0.295286	0.574011		Adults	0.217072	0.279899		CD02	tdTomato	0.0189585	0.208105		tdTomato	0.314117	0.341416
RJ01	Juveniles	0.297527	0.574438		Adults	0.219374	0.28159		CD02	tdTomato	0.021816	0.208608		tdTomato	0.316526	0.342881
RJ01	Juveniles	0.299768	0.574842		Adults	0.221677	0.283289		CD02	tdTomato	0.0246736	0.209108		tdTomato	0.318936	0.344337
RJ01	Juveniles	0.302009	0.575225		Adults	0.223979	0.284997		CD02	tdTomato	0.0275311	0.209606		tdTomato	0.321345	0.345784
RJ01	Juveniles	0.30425	0.575586		Adults	0.226281	0.286712		CD02	tdTomato	0.0303886	0.210103		tdTomato	0.323754	0.347223
RJ01	Juveniles	0.306491	0.575924		Adults	0.228584	0.288435		CD02	tdTomato	0.0332462	0.210597		tdTomato	0.326163	0.348654
RJ01	Juveniles	0.308732	0.576241		Adults	0.230886	0.290166		CD02	tdTomato	0.0361037	0.211089		tdTomato	0.328573	0.350076
RJ01	Juveniles	0.310973	0.576536		Adults	0.233188	0.291903		CD02	tdTomato	0.0389612	0.211579		tdTomato	0.330982	0.35149
RJ01	Juveniles	0.313214	0.576808		Adults	0.235491	0.293647		CD02	tdTomato	0.0418187	0.212067		tdTomato	0.333391	0.352896
RJ01	Juveniles	0.315456	0.577059		Adults	0.237793	0.295397		CD02	tdTomato	0.0446763	0.212553		tdTomato	0.3358	0.354294
RJ01	Juveniles	0.317697	0.577287		Adults	0.240095	0.297153		CD02	tdTomato	0.0475338	0.213038		tdTomato	0.33821	0.355683
RJ01	Juveniles	0.319938	0.577494		Adults	0.242398	0.298914		CD02	tdTomato	0.0503913	0.21352		tdTomato	0.340619	0.357065
RJ01	Juveniles	0.322179	0.577678		Adults	0.2447	0.30068		CD02	tdTomato	0.0532489	0.214001		tdTomato	0.343028	0.358438
RJ01	Juveniles	0.32442	0.57784		Adults	0.247002	0.302451		CD02	tdTomato	0.0561064	0.21448		tdTomato	0.345437	0.359804
RJ01	Juveniles	0.326661	0.57798		Adults	0.249305	0.304227		CD02	tdTomato	0.0589639	0.214957		tdTomato	0.347847	0.361162
RJ01	Juveniles	0.328902	0.578098		Adults	0.251607	0.306006		CD02	tdTomato	0.0618215	0.215433		tdTomato	0.350256	0.362512
RJ01	Juveniles	0.331143	0.578193		Adults	0.253909	0.307788		CD02	tdTomato	0.064679	0.215907		tdTomato	0.352665	0.363855
RJ01	Juveniles	0.333384	0.578267		Adults	0.256211	0.309574		CD02	tdTomato	0.0675365	0.216379		tdTomato	0.355074	0.36519
RJ01	Juveniles	0.335625	0.578319		Adults	0.258514	0.311361		CD02	tdTomato	0.0703941	0.21685		tdTomato	0.357484	0.366518
RJ01	Juveniles	0.337866	0.578348		Adults	0.260816	0.313151		CD02	tdTomato	0.0732516	0.21732		tdTomato	0.359893	0.367839
RJ01	Juveniles	0.340107	0.578356		Adults	0.263118	0.314942		CD02	tdTomato	0.0761091	0.217788		tdTomato	0.362302	0.369153
RJ01	Juveniles	0.342348	0.578342		Adults	0.265421	0.316734		CD02	tdTomato	0.0789667	0.218254		tdTomato	0.364712	0.37046
RJ01	Juveniles	0.344589	0.578305		Adults	0.267723	0.318527		CD02	tdTomato	0.0818242	0.21872		tdTomato	0.367121	0.37176
RJ01	Juveniles	0.34683	0.578247		Adults	0.270025	0.320319		CD02	tdTomato	0.0846817	0.219184		tdTomato	0.36953	0.373054
RJ01	Juveniles	0.349072	0.578167		Adults	0.272328	0.322111		CD02	tdTomato	0.0875393	0.219646		tdTomato	0.371939	0.374341
RJ01	Juveniles	0.351313	0.578066		Adults	0.27463	0.323902		CD02	tdTomato	0.0903968	0.220108		tdTomato	0.374349	0.375622
RJ01	Juveniles	0.353554	0.577943		Adults	0.276932	0.325691		CD02	tdTomato	0.0932543	0.220569		tdTomato	0.376758	0.376897
RJ01	Juveniles	0.355795	0.577798		Adults	0.279235	0.327478		CD02	tdTomato	0.0961118	0.221028		tdTomato	0.379167	0.378167
RJ01	Juveniles	0.358036	0.577631		Adults	0.281537	0.329262		CD02	tdTomato	0.0989694	0.221486		tdTomato	0.381576	0.37943
RJ01	Juveniles	0.360277	0.577443		Adults	0.283839	0.331043		CD02	tdTomato	0.101827	0.221944		tdTomato	0.383986	0.380688
RJ01	Juveniles	0.362518	0.577234		Adults	0.286142	0.332819		CD02	tdTomato	0.104684	0.2224		tdTomato	0.386395	0.381941
RJ01	Juveniles	0.364759	0.577004		Adults	0.288444	0.334592		CD02	tdTomato	0.107542	0.222856		tdTomato	0.388804	0.383189
RJ01	Juveniles	0.367	0.576752		Adults	0.290746	0.336359		CD02	tdTomato	0.1104	0.223311		tdTomato	0.391213	0.384432
RJ01	Juveniles	0.369241	0.576479		Adults	0.293049	0.338121		CD02	tdTomato	0.113257	0.223765		tdTomato	0.393623	0.38567
RJ01	Juveniles	0.371482	0.576185		Adults	0.295351	0.339877		CD02	tdTomato	0.116115	0.224219		tdTomato	0.396032	0.386904
RJ01	Juveniles	0.373723	0.575871		Adults	0.297653	0.341626		CD02	tdTomato	0.118972	0.224672		tdTomato	0.398441	0.388134
RJ01	Juveniles	0.375964	0.575535		Adults	0.299955	0.343368		CD02	tdTomato	0.12183	0.225124		tdTomato	0.40085	0.389359
RJ01	Juveniles	0.378205	0.575179		Adults	0.302258	0.345101		CD02	tdTomato	0.124687	0.225576		tdTomato	0.40326	0.390581
RJ01	Juveniles	0.380446	0.574803		Adults	0.30456	0.346827		CD02	tdTomato	0.127545	0.226027		tdTomato	0.405669	0.3918
RJ01	Juveniles	0.382688	0.574406		Adults	0.306862	0.348543		CD02	tdTomato	0.130402	0.226478		tdTomato	0.408078	0.393015
RJ01	Juveniles	0.384929	0.573989		Adults	0.309165	0.35025		CD02	tdTomato	0.13326	0.226929		tdTomato	0.410487	0.394227
RJ01	Juveniles	0.38717	0.573551		Adults	0.311467	0.351946		CD02	tdTomato	0.136117	0.22738		tdTomato	0.412897	0.395437
RJ01	Juveniles	0.389411	0.573094		Adults	0.313769	0.353632		CD02	tdTomato	0.138975	0.22783		tdTomato	0.415306	0.396644
RJ01	Juveniles	0.391652	0.572617		Adults	0.316072	0.355306		CD02	tdTomato	0.141832	0.22828		tdTomato	0.417715	0.397848
RJ01	Juveniles	0.393893	0.57212		Adults	0.318374	0.356969		CD02	tdTomato	0.14469	0.22873		tdTomato	0.420124	0.399051
RJ01	Juveniles	0.396134	0.571604		Adults	0.320676	0.358619		CD02	tdTomato	0.147547	0.229181		tdTomato	0.422534	0.400252
RJ01	Juveniles	0.398375	0.571068		Adults	0.322979	0.360256		CD02	tdTomato	0.150405	0.229631		tdTomato	0.424943	0.401451
RJ01	Juveniles	0.400616	0.570514		Adults	0.325281	0.36188		CD02	tdTomato	0.153262	0.230081		tdTomato	0.427352	0.402649
RJ01	Juveniles	0.402857	0.56994		Adults	0.327583	0.363489		CD02	tdTomato	0.15612	0.230532		tdTomato	0.429762	0.403846
RJ01	Juveniles	0.405098	0.569347		Adults	0.329886	0.365084		CD02	tdTomato	0.158978	0.230983		tdTomato	0.432171	0.405043
RJ01	Juveniles	0.407339	0.568736		Adults	0.332188	0.366664		CD02	tdTomato	0.161835	0.231434		tdTomato	0.43458	0.406239
RJ01	Juveniles	0.40958	0.568106		Adults	0.33449	0.368228		CD02	tdTomato	0.164693	0.231886		tdTomato	0.436989	0.407435
RJ01	Juveniles	0.411821	0.567457		Adults	0.336792	0.369776		CD02	tdTomato	0.16755	0.232338		tdTomato	0.439399	0.408631
RJ01	Juveniles	0.414062	0.566791		Adults	0.339095	0.371308		CD02	tdTomato	0.170408	0.232791		tdTomato	0.441808	0.409827
RJ01	Juveniles	0.416304	0.566107		Adults	0.341397	0.372822		CD02	tdTomato	0.173265	0.233244		tdTomato	0.444217	0.411024
RJ01	Juveniles	0.418545	0.565405		Adults	0.343699	0.374319		CD02	tdTomato	0.176123	0.233698		tdTomato	0.446626	0.412221
RJ01	Juveniles	0.420786	0.564686		Adults	0.346002	0.375797		CD02	tdTomato	0.17898	0.234153		tdTomato	0.449036	0.41342
RJ01	Juveniles	0.423027	0.563949		Adults	0.348304	0.377258		CD02	tdTomato	0.181838	0.234609		tdTomato	0.451445	0.41462
RJ01	Juveniles	0.425268	0.563195		Adults	0.350606	0.378699		CD02	tdTomato	0.184695	0.235065		tdTomato	0.453854	0.415822
RJ01	Juveniles	0.427509	0.562424		Adults	0.352909	0.380121		CD02	tdTomato	0.187553	0.235523		tdTomato	0.456263	0.417026
RJ01	Juveniles	0.42975	0.561637		Adults	0.355211	0.381523		CD02	tdTomato	0.19041	0.235981		tdTomato	0.458673	0.418232
RJ01	Juveniles	0.431991	0.560833		Adults	0.357513	0.382905		CD02	tdTomato	0.193268	0.236441		tdTomato	0.461082	0.419441
RJ01	Juveniles	0.434232	0.560013		Adults	0.359816	0.384267		CD02	tdTomato	0.196125	0.236901		tdTomato	0.463491	0.420652
RJ01	Juveniles	0.436473	0.559177		Adults	0.362118	0.385608		CD02	tdTomato	0.198983	0.237363		tdTomato	0.4659	0.421866
RJ01	Juveniles	0.438714	0.558325		Adults	0.36442	0.386928		CD02	tdTomato	0.201841	0.237827		tdTomato	0.46831	0.423083
RJ01	Juveniles	0.440955	0.557458		Adults	0.366723	0.388226		CD02	tdTomato	0.204698	0.238291		tdTomato	0.470719	0.424304
RJ01	Juveniles	0.443196	0.556575		Adults	0.369025	0.389503		CD02	tdTomato	0.207556	0.238757		tdTomato	0.473128	0.425528
RJ01	Juveniles	0.445437	0.555678		Adults	0.371327	0.390757		CD02	tdTomato	0.210413	0.239225		tdTomato	0.475537	0.426757
RJ01	Juveniles	0.447678	0.554765		Adults	0.373629	0.39199		CD02	tdTomato	0.213271	0.239694		tdTomato	0.477947	0.427989
RJ01	Juveniles	0.44992	0.553838		Adults	0.375932	0.393199		CD02	tdTomato	0.216128	0.240165		tdTomato	0.480356	0.429226
RJ01	Juveniles	0.452161	0.552897		Adults	0.378234	0.394387		CD02	tdTomato	0.218986	0.240637		tdTomato	0.482765	0.430468
RJ01	Juveniles	0.454402	0.551942		Adults	0.380536	0.395551		CD02	tdTomato	0.221843	0.241112		tdTomato	0.485174	0.431715
RJ01	Juveniles	0.456643	0.550973		Adults	0.382839	0.396692		CD02	tdTomato	0.224701	0.241588		tdTomato	0.487584	0.432966
RJ01	Juveniles	0.458884	0.54999		Adults	0.385141	0.39781		CD02	tdTomato	0.227558	0.242066		tdTomato	0.489993	0.434223
RJ01	Juveniles	0.461125	0.548995		Adults	0.387443	0.398904		CD02	tdTomato	0.230416	0.242546		tdTomato	0.492402	0.435485
RJ01	Juveniles	0.463366	0.547986		Adults	0.389746	0.399975		CD02	tdTomato	0.233273	0.243028		tdTomato	0.494811	0.436754
RJ01	Juveniles	0.465607	0.546964		Adults	0.392048	0.401023		CD02	tdTomato	0.236131	0.243512		tdTomato	0.497221	0.438028
RJ01	Juveniles	0.467848	0.545931		Adults	0.39435	0.402047		CD02	tdTomato	0.238988	0.243998		tdTomato	0.49963	0.439308
RJ01	Juveniles	0.470089	0.544884		Adults	0.396653	0.403047		CD02	tdTomato	0.241846	0.244487		tdTomato	0.502039	0.440594
RJ01	Juveniles	0.47233	0.543827		Adults	0.398955	0.404024		CD02	tdTomato	0.244703	0.244977		tdTomato	0.504449	0.441887
RJ01	Juveniles	0.474571	0.542757		Adults	0.401257	0.404977		CD02	tdTomato	0.247561	0.24547		tdTomato	0.506858	0.443187
RJ01	Juveniles	0.476812	0.541676		Adults	0.40356	0.405906		CD02	tdTomato	0.250419	0.245966		tdTomato	0.509267	0.444494
RJ01	Juveniles	0.479053	0.540584		Adults	0.405862	0.406812		CD02	tdTomato	0.253276	0.246464		tdTomato	0.511676	0.445807
RJ01	Juveniles	0.481294	0.539482		Adults	0.408164	0.407695		CD02	tdTomato	0.256134	0.246965		tdTomato	0.514086	0.447128
RJ01	Juveniles	0.483536	0.538369		Adults	0.410466	0.408554		CD02	tdTomato	0.258991	0.247468		tdTomato	0.516495	0.448456
RJ01	Juveniles	0.485777	0.537245		Adults	0.412769	0.40939		CD02	tdTomato	0.261849	0.247974		tdTomato	0.518904	0.449791
RJ01	Juveniles	0.488018	0.536112		Adults	0.415071	0.410203		CD02	tdTomato	0.264706	0.248482		tdTomato	0.521313	0.451134
RJ01	Juveniles	0.490259	0.53497		Adults	0.417373	0.410993		CD02	tdTomato	0.267564	0.248993		tdTomato	0.523723	0.452485
RJ01	Juveniles	0.4925	0.533818		Adults	0.419676	0.411761		CD02	tdTomato	0.270421	0.249508		tdTomato	0.526132	0.453843
RJ01	Juveniles	0.494741	0.532657		Adults	0.421978	0.412507		CD02	tdTomato	0.273279	0.250025		tdTomato	0.528541	0.45521
RJ01	Juveniles	0.496982	0.531487		Adults	0.42428	0.41323		CD02	tdTomato	0.276136	0.250545		tdTomato	0.53095	0.456584
RJ01	Juveniles	0.499223	0.530309		Adults	0.426583	0.413931		CD02	tdTomato	0.278994	0.251068		tdTomato	0.53336	0.457967
RJ01	Juveniles	0.501464	0.529123		Adults	0.428885	0.414611		CD02	tdTomato	0.281851	0.251594		tdTomato	0.535769	0.459358
RJ01	Juveniles	0.503705	0.527929		Adults	0.431187	0.41527		CD02	tdTomato	0.284709	0.252123		tdTomato	0.538178	0.460757
RJ01	Juveniles	0.505946	0.526727		Adults	0.43349	0.415908		CD02	tdTomato	0.287566	0.252655		tdTomato	0.540587	0.462165
RJ01	Juveniles	0.508187	0.525519		Adults	0.435792	0.416526		CD02	tdTomato	0.290424	0.253191		tdTomato	0.542997	0.463581
RJ01	Juveniles	0.510428	0.524303		Adults	0.438094	0.417124		CD02	tdTomato	0.293282	0.25373		tdTomato	0.545406	0.465005
RJ01	Juveniles	0.512669	0.523081		Adults	0.440397	0.417702		CD02	tdTomato	0.296139	0.254272		tdTomato	0.547815	0.466438
RJ01	Juveniles	0.51491	0.521853		Adults	0.442699	0.418261		CD02	tdTomato	0.298997	0.254817		tdTomato	0.550224	0.467879
RJ01	Juveniles	0.517152	0.520618		Adults	0.445001	0.418802		CD02	tdTomato	0.301854	0.255366		tdTomato	0.552634	0.46933
RJ01	Juveniles	0.519393	0.519379		Adults	0.447303	0.419324		CD02	tdTomato	0.304712	0.255919		tdTomato	0.555043	0.470788
RJ01	Juveniles	0.521634	0.518133		Adults	0.449606	0.419829		CD02	tdTomato	0.307569	0.256475		tdTomato	0.557452	0.472255
RJ01	Juveniles	0.523875	0.516883		Adults	0.451908	0.420317		CD02	tdTomato	0.310427	0.257034		tdTomato	0.559861	0.473731
RJ01	Juveniles	0.526116	0.515628		Adults	0.45421	0.420788		CD02	tdTomato	0.313284	0.257597		tdTomato	0.562271	0.475215
RJ01	Juveniles	0.528357	0.514369		Adults	0.456513	0.421243		CD02	tdTomato	0.316142	0.258164		tdTomato	0.56468	0.476708
RJ01	Juveniles	0.530598	0.513105		Adults	0.458815	0.421683		CD02	tdTomato	0.318999	0.258734		tdTomato	0.567089	0.47821
RJ01	Juveniles	0.532839	0.511838		Adults	0.461117	0.422109		CD02	tdTomato	0.321857	0.259308		tdTomato	0.569499	0.47972
RJ01	Juveniles	0.53508	0.510567		Adults	0.46342	0.42252		CD02	tdTomato	0.324714	0.259886		tdTomato	0.571908	0.481238
RJ01	Juveniles	0.537321	0.509293		Adults	0.465722	0.422918		CD02	tdTomato	0.327572	0.260468		tdTomato	0.574317	0.482764
RJ01	Juveniles	0.539562	0.508016		Adults	0.468024	0.423304		CD02	tdTomato	0.330429	0.261053		tdTomato	0.576726	0.484299
RJ01	Juveniles	0.541803	0.506737		Adults	0.470327	0.423677		CD02	tdTomato	0.333287	0.261643		tdTomato	0.579136	0.485842
RJ01	Juveniles	0.544044	0.505455		Adults	0.472629	0.424039		CD02	tdTomato	0.336145	0.262236		tdTomato	0.581545	0.487393
RJ01	Juveniles	0.546285	0.504172		Adults	0.474931	0.424391		CD02	tdTomato	0.339002	0.262833		tdTomato	0.583954	0.488952
RJ01	Juveniles	0.548526	0.502886		Adults	0.477234	0.424733		CD02	tdTomato	0.34186	0.263435		tdTomato	0.586363	0.490519
RJ01	Juveniles	0.550768	0.5016		Adults	0.479536	0.425065		CD02	tdTomato	0.344717	0.26404		tdTomato	0.588773	0.492094
RJ01	Juveniles	0.553009	0.500312		Adults	0.481838	0.42539		CD02	tdTomato	0.347575	0.264649		tdTomato	0.591182	0.493676
RJ01	Juveniles	0.55525	0.499024		Adults	0.484141	0.425707		CD02	tdTomato	0.350432	0.265262		tdTomato	0.593591	0.495266
RJ01	Juveniles	0.557491	0.497736		Adults	0.486443	0.426017		CD02	tdTomato	0.35329	0.26588		tdTomato	0.596	0.496863
RJ01	Juveniles	0.559732	0.496447		Adults	0.488745	0.426321		CD02	tdTomato	0.356147	0.266501		tdTomato	0.59841	0.498467
RJ01	Juveniles	0.561973	0.495158		Adults	0.491047	0.42662		CD02	tdTomato	0.359005	0.267127		tdTomato	0.600819	0.500078
RJ01	Juveniles	0.564214	0.49387		Adults	0.49335	0.426915		CD02	tdTomato	0.361862	0.267757		tdTomato	0.603228	0.501696
RJ01	Juveniles	0.566455	0.492583		Adults	0.495652	0.427207		CD02	tdTomato	0.36472	0.268391		tdTomato	0.605637	0.50332
RJ01	Juveniles	0.568696	0.491297		Adults	0.497954	0.427495		CD02	tdTomato	0.367577	0.269029		tdTomato	0.608047	0.504951
RJ01	Juveniles	0.570937	0.490013		Adults	0.500257	0.427782		CD02	tdTomato	0.370435	0.269671		tdTomato	0.610456	0.506588
RJ01	Juveniles	0.573178	0.48873		Adults	0.502559	0.428068		CD02	tdTomato	0.373292	0.270318		tdTomato	0.612865	0.508231
RJ01	Juveniles	0.575419	0.487449		Adults	0.504861	0.428354		CD02	tdTomato	0.37615	0.270969		tdTomato	0.615274	0.50988
RJ01	Juveniles	0.57766	0.48617		Adults	0.507164	0.42864		CD02	tdTomato	0.379007	0.271624		tdTomato	0.617684	0.511534
RJ01	Juveniles	0.579901	0.484894		Adults	0.509466	0.428928		CD02	tdTomato	0.381865	0.272283		tdTomato	0.620093	0.513194
RJ01	Juveniles	0.582142	0.483621		Adults	0.511768	0.429219		CD02	tdTomato	0.384723	0.272947		tdTomato	0.622502	0.514858
RJ01	Juveniles	0.584383	0.482351		Adults	0.514071	0.429513		CD02	tdTomato	0.38758	0.273615		tdTomato	0.624911	0.516527
RJ01	Juveniles	0.586625	0.481085		Adults	0.516373	0.429811		CD02	tdTomato	0.390438	0.274287		tdTomato	0.627321	0.518201
RJ01	Juveniles	0.588866	0.479822		Adults	0.518675	0.430114		CD02	tdTomato	0.393295	0.274964		tdTomato	0.62973	0.519879
RJ01	Juveniles	0.591107	0.478563		Adults	0.520978	0.430422		CD02	tdTomato	0.396153	0.275644		tdTomato	0.632139	0.52156
RJ01	Juveniles	0.593348	0.477309		Adults	0.52328	0.430738		CD02	tdTomato	0.39901	0.276329		tdTomato	0.634549	0.523246
RJ01	Juveniles	0.595589	0.476059		Adults	0.525582	0.431061		CD02	tdTomato	0.401868	0.277019		tdTomato	0.636958	0.524934
RJ01	Juveniles	0.59783	0.474814		Adults	0.527884	0.431392		CD02	tdTomato	0.404725	0.277713		tdTomato	0.639367	0.526626
RJ01	Juveniles	0.600071	0.473574		Adults	0.530187	0.431732		CD02	tdTomato	0.407583	0.278411		tdTomato	0.641776	0.52832
RJ01	Juveniles	0.602312	0.472339		Adults	0.532489	0.432083		CD02	tdTomato	0.41044	0.279113		tdTomato	0.644186	0.530016
RJ01	Juveniles	0.604553	0.471111		Adults	0.534791	0.432444		CD02	tdTomato	0.413298	0.27982		tdTomato	0.646595	0.531714
RJ01	Juveniles	0.606794	0.469888		Adults	0.537094	0.432817		CD02	tdTomato	0.416155	0.280531		tdTomato	0.649004	0.533414
RJ01	Juveniles	0.609035	0.468671		Adults	0.539396	0.433202		CD02	tdTomato	0.419013	0.281246		tdTomato	0.651413	0.535115
RJ01	Juveniles	0.611276	0.467461		Adults	0.541698	0.4336		CD02	tdTomato	0.42187	0.281965		tdTomato	0.653823	0.536818
RJ01	Juveniles	0.613517	0.466257		Adults	0.544001	0.434013		CD02	tdTomato	0.424728	0.282689		tdTomato	0.656232	0.53852
RJ01	Juveniles	0.615758	0.465061		Adults	0.546303	0.43444		CD02	tdTomato	0.427586	0.283417		tdTomato	0.658641	0.540223
RJ01	Juveniles	0.617999	0.463871		Adults	0.548605	0.434882		CD02	tdTomato	0.430443	0.284149		tdTomato	0.66105	0.541926
RJ01	Juveniles	0.620241	0.46269		Adults	0.550908	0.435341		CD02	tdTomato	0.433301	0.284886		tdTomato	0.66346	0.543628
RJ01	Juveniles	0.622482	0.461516		Adults	0.55321	0.435816		CD02	tdTomato	0.436158	0.285626		tdTomato	0.665869	0.545329
RJ01	Juveniles	0.624723	0.460349		Adults	0.555512	0.436309		CD02	tdTomato	0.439016	0.286371		tdTomato	0.668278	0.547028
RJ01	Juveniles	0.626964	0.459191		Adults	0.557815	0.436821		CD02	tdTomato	0.441873	0.28712		tdTomato	0.670687	0.548726
RJ01	Juveniles	0.629205	0.458042		Adults	0.560117	0.437351		CD02	tdTomato	0.444731	0.287873		tdTomato	0.673097	0.550422
RJ01	Juveniles	0.631446	0.456901		Adults	0.562419	0.437901		CD02	tdTomato	0.447588	0.28863		tdTomato	0.675506	0.552115
RJ01	Juveniles	0.633687	0.455769		Adults	0.564721	0.438471		CD02	tdTomato	0.450446	0.289392		tdTomato	0.677915	0.553805
RJ01	Juveniles	0.635928	0.454646		Adults	0.567024	0.439062		CD02	tdTomato	0.453303	0.290157		tdTomato	0.680324	0.555491
RJ01	Juveniles	0.638169	0.453533		Adults	0.569326	0.439674		CD02	tdTomato	0.456161	0.290926		tdTomato	0.682734	0.557174
RJ01	Juveniles	0.64041	0.452429		Adults	0.571628	0.440309		CD02	tdTomato	0.459018	0.291699		tdTomato	0.685143	0.558853
RJ01	Juveniles	0.642651	0.451335		Adults	0.573931	0.440965		CD02	tdTomato	0.461876	0.292477		tdTomato	0.687552	0.560526
RJ01	Juveniles	0.644892	0.450251		Adults	0.576233	0.441645		CD02	tdTomato	0.464733	0.293258		tdTomato	0.689961	0.562195
RJ01	Juveniles	0.647133	0.449177		Adults	0.578535	0.442349		CD02	tdTomato	0.467591	0.294043		tdTomato	0.692371	0.563858
RJ01	Juveniles	0.649374	0.448114		Adults	0.580838	0.443076		CD02	tdTomato	0.470448	0.294832		tdTomato	0.69478	0.565515
RJ01	Juveniles	0.651615	0.447061		Adults	0.58314	0.443828		CD02	tdTomato	0.473306	0.295624		tdTomato	0.697189	0.567165
RJ01	Juveniles	0.653857	0.446019		Adults	0.585442	0.444605		CD02	tdTomato	0.476164	0.296421		tdTomato	0.699599	0.568809
RJ01	Juveniles	0.656098	0.444988		Adults	0.587745	0.445407		CD02	tdTomato	0.479021	0.297221		tdTomato	0.702008	0.570445
RJ01	Juveniles	0.658339	0.443969		Adults	0.590047	0.446235		CD02	tdTomato	0.481879	0.298025		tdTomato	0.704417	0.572074
RJ01	Juveniles	0.66058	0.44296		Adults	0.592349	0.447089		CD02	tdTomato	0.484736	0.298832		tdTomato	0.706826	0.573694
RJ01	Juveniles	0.662821	0.441964		Adults	0.594652	0.447969		CD02	tdTomato	0.487594	0.299643		tdTomato	0.709236	0.575305
RJ01	Juveniles	0.665062	0.440979		Adults	0.596954	0.448876		CD02	tdTomato	0.490451	0.300458		tdTomato	0.711645	0.576908
RJ01	Juveniles	0.667303	0.440006		Adults	0.599256	0.449811		CD02	tdTomato	0.493309	0.301276		tdTomato	0.714054	0.5785
RJ01	Juveniles	0.669544	0.439045		Adults	0.601558	0.450772		CD02	tdTomato	0.496166	0.302097		tdTomato	0.716463	0.580083
RJ01	Juveniles	0.671785	0.438096		Adults	0.603861	0.451761		CD02	tdTomato	0.499024	0.302922		tdTomato	0.718873	0.581655
RJ01	Juveniles	0.674026	0.43716		Adults	0.606163	0.452777		CD02	tdTomato	0.501881	0.303751		tdTomato	0.721282	0.583216
RJ01	Juveniles	0.676267	0.436236		Adults	0.608465	0.453822		CD02	tdTomato	0.504739	0.304582		tdTomato	0.723691	0.584765
RJ01	Juveniles	0.678508	0.435325		Adults	0.610768	0.454894		CD02	tdTomato	0.507596	0.305417		tdTomato	0.7261	0.586303
RJ01	Juveniles	0.680749	0.434428		Adults	0.61307	0.455995		CD02	tdTomato	0.510454	0.306254		tdTomato	0.72851	0.587828
RJ01	Juveniles	0.68299	0.433543		Adults	0.615372	0.457123		CD02	tdTomato	0.513311	0.307095		tdTomato	0.730919	0.589341
RJ01	Juveniles	0.685231	0.432671		Adults	0.617675	0.458281		CD02	tdTomato	0.516169	0.307939		tdTomato	0.733328	0.59084
RJ01	Juveniles	0.687473	0.431813		Adults	0.619977	0.459466		CD02	tdTomato	0.519027	0.308786		tdTomato	0.735737	0.592326
RJ01	Juveniles	0.689714	0.430968		Adults	0.622279	0.46068		CD02	tdTomato	0.521884	0.309636		tdTomato	0.738147	0.593797
RJ01	Juveniles	0.691955	0.430137		Adults	0.624582	0.461922		CD02	tdTomato	0.524742	0.310488		tdTomato	0.740556	0.595254
RJ01	Juveniles	0.694196	0.429319		Adults	0.626884	0.463193		CD02	tdTomato	0.527599	0.311344		tdTomato	0.742965	0.596696
RJ01	Juveniles	0.696437	0.428516		Adults	0.629186	0.464492		CD02	tdTomato	0.530457	0.312202		tdTomato	0.745374	0.598122
RJ01	Juveniles	0.698678	0.427726		Adults	0.631489	0.465819		CD02	tdTomato	0.533314	0.313063		tdTomato	0.747784	0.599532
RJ01	Juveniles	0.700919	0.42695		Adults	0.633791	0.467174		CD02	tdTomato	0.536172	0.313926		tdTomato	0.750193	0.600926
RJ01	Juveniles	0.70316	0.426189		Adults	0.636093	0.468557		CD02	tdTomato	0.539029	0.314792		tdTomato	0.752602	0.602303
RJ01	Juveniles	0.705401	0.425442		Adults	0.638395	0.469968		CD02	tdTomato	0.541887	0.31566		tdTomato	0.755011	0.603663
RJ01	Juveniles	0.707642	0.424709		Adults	0.640698	0.471406		CD02	tdTomato	0.544744	0.31653		tdTomato	0.757421	0.605006
RJ01	Juveniles	0.709883	0.423991		Adults	0.643	0.472872		CD02	tdTomato	0.547602	0.317403		tdTomato	0.75983	0.60633
RJ01	Juveniles	0.712124	0.423287		Adults	0.645302	0.474365		CD02	tdTomato	0.550459	0.318278		tdTomato	0.762239	0.607636
RJ01	Juveniles	0.714365	0.422599		Adults	0.647605	0.475884		CD02	tdTomato	0.553317	0.319155		tdTomato	0.764649	0.608923
RJ01	Juveniles	0.716606	0.421924		Adults	0.649907	0.477431		CD02	tdTomato	0.556174	0.320034		tdTomato	0.767058	0.61019
RJ01	Juveniles	0.718847	0.421265		Adults	0.652209	0.479003		CD02	tdTomato	0.559032	0.320914		tdTomato	0.769467	0.611438
RJ01	Juveniles	0.721089	0.420621		Adults	0.654512	0.480602		CD02	tdTomato	0.56189	0.321797		tdTomato	0.771876	0.612666
RJ01	Juveniles	0.72333	0.419991		Adults	0.656814	0.482226		CD02	tdTomato	0.564747	0.322682		tdTomato	0.774286	0.613874
RJ01	Juveniles	0.725571	0.419377		Adults	0.659116	0.483875		CD02	tdTomato	0.567605	0.323568		tdTomato	0.776695	0.61506
RJ01	Juveniles	0.727812	0.418778		Adults	0.661419	0.485549		CD02	tdTomato	0.570462	0.324456		tdTomato	0.779104	0.616226
RJ01	Juveniles	0.730053	0.418194		Adults	0.663721	0.487247		CD02	tdTomato	0.57332	0.325345		tdTomato	0.781513	0.617369
RJ01	Juveniles	0.732294	0.417625		Adults	0.666023	0.488969		CD02	tdTomato	0.576177	0.326236		tdTomato	0.783923	0.618491
RJ01	Juveniles	0.734535	0.417071		Adults	0.668326	0.490715		CD02	tdTomato	0.579035	0.327128		tdTomato	0.786332	0.619591
RJ01	Juveniles	0.736776	0.416533		Adults	0.670628	0.492484		CD02	tdTomato	0.581892	0.328021		tdTomato	0.788741	0.620668
RJ01	Juveniles	0.739017	0.41601		Adults	0.67293	0.494275		CD02	tdTomato	0.58475	0.328916		tdTomato	0.79115	0.621722
RJ01	Juveniles	0.741258	0.415503		Adults	0.675233	0.496087		CD02	tdTomato	0.587607	0.329811		tdTomato	0.79356	0.622753
RJ01	Juveniles	0.743499	0.41501		Adults	0.677535	0.497922		CD02	tdTomato	0.590465	0.330708		tdTomato	0.795969	0.62376
RJ01	Juveniles	0.74574	0.414534		Adults	0.679837	0.499777		CD02	tdTomato	0.593322	0.331605		tdTomato	0.798378	0.624743
RJ01	Juveniles	0.747981	0.414073		Adults	0.682139	0.501652		CD02	tdTomato	0.59618	0.332503		tdTomato	0.800787	0.625701
RJ01	Juveniles	0.750222	0.413627		Adults	0.684442	0.503547		CD02	tdTomato	0.599037	0.333402		tdTomato	0.803197	0.626636
RJ01	Juveniles	0.752463	0.413197		Adults	0.686744	0.505461		CD02	tdTomato	0.601895	0.334301		tdTomato	0.805606	0.627545
RJ01	Juveniles	0.754705	0.412782		Adults	0.689046	0.507393		CD02	tdTomato	0.604752	0.335201		tdTomato	0.808015	0.628429
RJ01	Juveniles	0.756946	0.412383		Adults	0.691349	0.509343		CD02	tdTomato	0.60761	0.336102		tdTomato	0.810424	0.629288
RJ01	Juveniles	0.759187	0.411999		Adults	0.693651	0.511311		CD02	tdTomato	0.610468	0.337002		tdTomato	0.812834	0.630122
RJ01	Juveniles	0.761428	0.411631		Adults	0.695953	0.513294		CD02	tdTomato	0.613325	0.337903		tdTomato	0.815243	0.630929
RJ01	Juveniles	0.763669	0.411279		Adults	0.698256	0.515294		CD02	tdTomato	0.616183	0.338804		tdTomato	0.817652	0.63171
RJ01	Juveniles	0.76591	0.410942		Adults	0.700558	0.517308		CD02	tdTomato	0.61904	0.339705		tdTomato	0.820061	0.632465
RJ01	Juveniles	0.768151	0.41062		Adults	0.70286	0.519337		CD02	tdTomato	0.621898	0.340606		tdTomato	0.822471	0.633193
RJ01	Juveniles	0.770392	0.410314		Adults	0.705163	0.521379		CD02	tdTomato	0.624755	0.341506		tdTomato	0.82488	0.633894
RJ01	Juveniles	0.772633	0.410023		Adults	0.707465	0.523434		CD02	tdTomato	0.627613	0.342407		tdTomato	0.827289	0.634568
RJ01	Juveniles	0.774874	0.409748		Adults	0.709767	0.525502		CD02	tdTomato	0.63047	0.343307		tdTomato	0.829698	0.635215
RJ01	Juveniles	0.777115	0.409488		Adults	0.71207	0.527581		CD02	tdTomato	0.633328	0.344206		tdTomato	0.832108	0.635835
RJ01	Juveniles	0.779356	0.409243		Adults	0.714372	0.52967		CD02	tdTomato	0.636185	0.345105		tdTomato	0.834517	0.636427
RJ01	Juveniles	0.781597	0.409014		Adults	0.716674	0.531769		CD02	tdTomato	0.639043	0.346003		tdTomato	0.836926	0.636991
RJ01	Juveniles	0.783838	0.4088		Adults	0.718976	0.533878		CD02	tdTomato	0.6419	0.3469		tdTomato	0.839336	0.637528
RJ01	Juveniles	0.786079	0.408601		Adults	0.721279	0.535995		CD02	tdTomato	0.644758	0.347797		tdTomato	0.841745	0.638036
RJ01	Juveniles	0.788321	0.408417		Adults	0.723581	0.538119		CD02	tdTomato	0.647615	0.348692		tdTomato	0.844154	0.638516
RJ01	Juveniles	0.790562	0.408249		Adults	0.725883	0.54025		CD02	tdTomato	0.650473	0.349586		tdTomato	0.846563	0.638968
RJ01	Juveniles	0.792803	0.408095		Adults	0.728186	0.542388		CD02	tdTomato	0.653331	0.350479		tdTomato	0.848973	0.639392
RJ01	Juveniles	0.795044	0.407957		Adults	0.730488	0.54453		CD02	tdTomato	0.656188	0.351371		tdTomato	0.851382	0.639787
RJ01	Juveniles	0.797285	0.407833		Adults	0.73279	0.546677		CD02	tdTomato	0.659046	0.352261		tdTomato	0.853791	0.640153
RJ01	Juveniles	0.799526	0.407725		Adults	0.735093	0.548827		CD02	tdTomato	0.661903	0.35315		tdTomato	0.8562	0.640491
RJ01	Juveniles	0.801767	0.407631		Adults	0.737395	0.55098		CD02	tdTomato	0.664761	0.354037		tdTomato	0.85861	0.6408
RJ01	Juveniles	0.804008	0.407551		Adults	0.739697	0.553135		CD02	tdTomato	0.667618	0.354922		tdTomato	0.861019	0.64108
RJ01	Juveniles	0.806249	0.407487		Adults	0.742	0.555292		CD02	tdTomato	0.670476	0.355806		tdTomato	0.863428	0.641332
RJ01	Juveniles	0.80849	0.407437		Adults	0.744302	0.557448		CD02	tdTomato	0.673333	0.356687		tdTomato	0.865837	0.641555
RJ01	Juveniles	0.810731	0.407401		Adults	0.746604	0.559605		CD02	tdTomato	0.676191	0.357566		tdTomato	0.868247	0.641748
RJ01	Juveniles	0.812972	0.40738		Adults	0.748907	0.56176		CD02	tdTomato	0.679048	0.358444		tdTomato	0.870656	0.641914
RJ01	Juveniles	0.815213	0.407372		Adults	0.751209	0.563913		CD02	tdTomato	0.681906	0.359319		tdTomato	0.873065	0.64205
RJ01	Juveniles	0.817454	0.40738		Adults	0.753511	0.566063		CD02	tdTomato	0.684763	0.360191		tdTomato	0.875474	0.642157
RJ01	Juveniles	0.819695	0.407401		Adults	0.755813	0.568209		CD02	tdTomato	0.687621	0.361061		tdTomato	0.877884	0.642236
RJ01	Juveniles	0.821937	0.407436		Adults	0.758116	0.570351		CD02	tdTomato	0.690478	0.361929		tdTomato	0.880293	0.642286
RJ01	Juveniles	0.824178	0.407485		Adults	0.760418	0.572488		CD02	tdTomato	0.693336	0.362794		tdTomato	0.882702	0.642307
RJ01	Juveniles	0.826419	0.407547		Adults	0.76272	0.574619		CD02	tdTomato	0.696193	0.363656		tdTomato	0.885111	0.6423
RJ01	Juveniles	0.82866	0.407623		Adults	0.765023	0.576743		CD02	tdTomato	0.699051	0.364515		tdTomato	0.887521	0.642264
RJ01	Juveniles	0.830901	0.407713		Adults	0.767325	0.578859		CD02	tdTomato	0.701909	0.365371		tdTomato	0.88993	0.6422
RJ01	Juveniles	0.833142	0.407816		Adults	0.769627	0.580967		CD02	tdTomato	0.704766	0.366224		tdTomato	0.892339	0.642108
RJ01	Juveniles	0.835383	0.407932		Adults	0.77193	0.583066		CD02	tdTomato	0.707624	0.367074		tdTomato	0.894748	0.641987
RJ01	Juveniles	0.837624	0.408062		Adults	0.774232	0.585155		CD02	tdTomato	0.710481	0.36792		tdTomato	0.897158	0.641838
RJ01	Juveniles	0.839865	0.408204		Adults	0.776534	0.587233		CD02	tdTomato	0.713339	0.368763		tdTomato	0.899567	0.641662
RJ01	Juveniles	0.842106	0.40836		Adults	0.778837	0.5893		CD02	tdTomato	0.716196	0.369603		tdTomato	0.901976	0.641457
RJ01	Juveniles	0.844347	0.408528		Adults	0.781139	0.591355		CD02	tdTomato	0.719054	0.370439		tdTomato	0.904386	0.641225
RJ01	Juveniles	0.846588	0.408708		Adults	0.783441	0.593397		CD02	tdTomato	0.721911	0.371271		tdTomato	0.906795	0.640966
RJ01	Juveniles	0.848829	0.408901		Adults	0.785744	0.595426		CD02	tdTomato	0.724769	0.372099		tdTomato	0.909204	0.640679
RJ01	Juveniles	0.85107	0.409106		Adults	0.788046	0.59744		CD02	tdTomato	0.727626	0.372924		tdTomato	0.911613	0.640365
RJ01	Juveniles	0.853311	0.409324		Adults	0.790348	0.599439		CD02	tdTomato	0.730484	0.373744		tdTomato	0.914023	0.640024
RJ01	Juveniles	0.855553	0.409553		Adults	0.79265	0.601422		CD02	tdTomato	0.733341	0.374561		tdTomato	0.916432	0.639657
RJ01	Juveniles	0.857794	0.409794		Adults	0.794953	0.603389		CD02	tdTomato	0.736199	0.375373		tdTomato	0.918841	0.639263
RJ01	Juveniles	0.860035	0.410047		Adults	0.797255	0.605339		CD02	tdTomato	0.739056	0.376181		tdTomato	0.92125	0.638843
RJ01	Juveniles	0.862276	0.410312		Adults	0.799557	0.607271		CD02	tdTomato	0.741914	0.376984		tdTomato	0.92366	0.638398
RJ01	Juveniles	0.864517	0.410588		Adults	0.80186	0.609185		CD02	tdTomato	0.744772	0.377783		tdTomato	0.926069	0.637926
RJ01	Juveniles	0.866758	0.410875		Adults	0.804162	0.61108		CD02	tdTomato	0.747629	0.378577		tdTomato	0.928478	0.637429
RJ01	Juveniles	0.868999	0.411173		Adults	0.806464	0.612955		CD02	tdTomato	0.750487	0.379367		tdTomato	0.930887	0.636907
RJ01	Juveniles	0.87124	0.411482		Adults	0.808767	0.61481		CD02	tdTomato	0.753344	0.380152		tdTomato	0.933297	0.63636
RJ01	Juveniles	0.873481	0.411801		Adults	0.811069	0.616644		CD02	tdTomato	0.756202	0.380932		tdTomato	0.935706	0.635789
RJ01	Juveniles	0.875722	0.412132		Adults	0.813371	0.618456		CD02	tdTomato	0.759059	0.381707		tdTomato	0.938115	0.635194
RJ01	Juveniles	0.877963	0.412472		Adults	0.815674	0.620247		CD02	tdTomato	0.761917	0.382477		tdTomato	0.940524	0.634574
RJ01	Juveniles	0.880204	0.412823		Adults	0.817976	0.622015		CD02	tdTomato	0.764774	0.383241		tdTomato	0.942934	0.633931
RJ01	Juveniles	0.882445	0.413184		Adults	0.820278	0.62376		CD02	tdTomato	0.767632	0.384001		tdTomato	0.945343	0.633265
RJ01	Juveniles	0.884686	0.413554		Adults	0.822581	0.625481		CD02	tdTomato	0.770489	0.384755		tdTomato	0.947752	0.632576
RJ01	Juveniles	0.886927	0.413934		Adults	0.824883	0.627178		CD02	tdTomato	0.773347	0.385504		tdTomato	0.950161	0.631864
RJ01	Juveniles	0.889168	0.414324		Adults	0.827185	0.62885		CD02	tdTomato	0.776204	0.386247		tdTomato	0.952571	0.631131
RJ01	Juveniles	0.89141	0.414723		Adults	0.829487	0.630497		CD02	tdTomato	0.779062	0.386985		tdTomato	0.95498	0.630375
RJ01	Juveniles	0.893651	0.415131		Adults	0.83179	0.632118		CD02	tdTomato	0.781919	0.387717		tdTomato	0.957389	0.629598
RJ01	Juveniles	0.895892	0.415548		Adults	0.834092	0.633713		CD02	tdTomato	0.784777	0.388444		tdTomato	0.959798	0.628801
RJ01	Juveniles	0.898133	0.415974		Adults	0.836394	0.635281		CD02	tdTomato	0.787635	0.389164		tdTomato	0.962208	0.627982
RJ01	Juveniles	0.900374	0.416408		Adults	0.838697	0.636823		CD02	tdTomato	0.790492	0.389879		tdTomato	0.964617	0.627143
RJ01	Juveniles	0.902615	0.416851		Adults	0.840999	0.638337		CD02	tdTomato	0.79335	0.390588		tdTomato	0.967026	0.626285
RJ01	Juveniles	0.904856	0.417302		Adults	0.843301	0.639823		CD02	tdTomato	0.796207	0.39129		tdTomato	0.969436	0.625407
RJ01	Juveniles	0.907097	0.41776		Adults	0.845604	0.641281		CD02	tdTomato	0.799065	0.391987		tdTomato	0.971845	0.62451
RJ01	Juveniles	0.909338	0.418227		Adults	0.847906	0.64271		CD02	tdTomato	0.801922	0.392677		tdTomato	0.974254	0.623595
RJ01	Juveniles	0.911579	0.418701		Adults	0.850208	0.644111		CD02	tdTomato	0.80478	0.393361		tdTomato	0.976663	0.622662
RJ01	Juveniles	0.91382	0.419182		Adults	0.852511	0.645482		CD02	tdTomato	0.807637	0.394038		tdTomato	0.979073	0.621711
RJ01	Juveniles	0.916061	0.419671		Adults	0.854813	0.646823		CD02	tdTomato	0.810495	0.39471		tdTomato	0.981482	0.620743
RJ01	Juveniles	0.918302	0.420166		Adults	0.857115	0.648135		CD02	tdTomato	0.813352	0.395374		tdTomato	0.983891	0.619758
RJ01	Juveniles	0.920543	0.420669		Adults	0.859418	0.649416		CD02	tdTomato	0.81621	0.396032		tdTomato	0.9863	0.618757
RJ01	Juveniles	0.922784	0.421177		Adults	0.86172	0.650667		CD02	tdTomato	0.819067	0.396684		tdTomato	0.98871	0.61774
RJ01	Juveniles	0.925026	0.421693		Adults	0.864022	0.651888		CD02	tdTomato	0.821925	0.397329		tdTomato	0.991119	0.616708
RJ01	Juveniles	0.927267	0.422214		Adults	0.866325	0.653077		CD02	tdTomato	0.824782	0.397967		tdTomato	0.993528	0.615661
RJ01	Juveniles	0.929508	0.422741		Adults	0.868627	0.654235		CD02	tdTomato	0.82764	0.398598		tdTomato	0.995937	0.614599
RJ01	Juveniles	0.931749	0.423274		Adults	0.870929	0.655362		CD02	tdTomato	0.830497	0.399222		tdTomato	0.998347	0.613524
RJ01	Juveniles	0.93399	0.423813		Adults	0.873231	0.656458		CD02	tdTomato	0.833355	0.399839		tdTomato	1.00076	0.612435
RJ01	Juveniles	0.936231	0.424357		Adults	0.875534	0.657521		CD02	tdTomato	0.836213	0.40045		tdTomato	1.00317	0.611334
RJ01	Juveniles	0.938472	0.424906		Adults	0.877836	0.658553		CD02	tdTomato	0.83907	0.401053		tdTomato	1.00557	0.61022
RJ01	Juveniles	0.940713	0.42546		Adults	0.880138	0.659553		CD02	tdTomato	0.841928	0.401649		tdTomato	1.00798	0.609094
RJ01	Juveniles	0.942954	0.426018		Adults	0.882441	0.660521		CD02	tdTomato	0.844785	0.402238		tdTomato	1.01039	0.607957
RJ01	Juveniles	0.945195	0.426581		Adults	0.884743	0.661457		CD02	tdTomato	0.847643	0.40282		tdTomato	1.0128	0.606809
RJ01	Juveniles	0.947436	0.427149		Adults	0.887045	0.662361		CD02	tdTomato	0.8505	0.403394		tdTomato	1.01521	0.605651
RJ01	Juveniles	0.949677	0.42772		Adults	0.889348	0.663233		CD02	tdTomato	0.853358	0.403961		tdTomato	1.01762	0.604483
RJ01	Juveniles	0.951918	0.428296		Adults	0.89165	0.664072		CD02	tdTomato	0.856215	0.404521		tdTomato	1.02003	0.603306
RJ01	Juveniles	0.954159	0.428875		Adults	0.893952	0.664879		CD02	tdTomato	0.859073	0.405073		tdTomato	1.02244	0.602119
RJ01	Juveniles	0.9564	0.429457		Adults	0.896255	0.665654		CD02	tdTomato	0.86193	0.405618		tdTomato	1.02485	0.600925
RJ01	Juveniles	0.958642	0.430043		Adults	0.898557	0.666397		CD02	tdTomato	0.864788	0.406156		tdTomato	1.02726	0.599723
RJ01	Juveniles	0.960883	0.430631		Adults	0.900859	0.667108		CD02	tdTomato	0.867645	0.406685		tdTomato	1.02967	0.598513
RJ01	Juveniles	0.963124	0.431223		Adults	0.903162	0.667786		CD02	tdTomato	0.870503	0.407208		tdTomato	1.03208	0.597297
RJ01	Juveniles	0.965365	0.431817		Adults	0.905464	0.668433		CD02	tdTomato	0.87336	0.407722		tdTomato	1.03449	0.596074
RJ01	Juveniles	0.967606	0.432414		Adults	0.907766	0.669047		CD02	tdTomato	0.876218	0.408229		tdTomato	1.03689	0.594846
RJ01	Juveniles	0.969847	0.433012		Adults	0.910068	0.66963		CD02	tdTomato	0.879076	0.408728		tdTomato	1.0393	0.593613
RJ01	Juveniles	0.972088	0.433613		Adults	0.912371	0.670181		CD02	tdTomato	0.881933	0.40922		tdTomato	1.04171	0.592375
RJ01	Juveniles	0.974329	0.434216		Adults	0.914673	0.670701		CD02	tdTomato	0.884791	0.409703		tdTomato	1.04412	0.591132
RJ01	Juveniles	0.97657	0.43482		Adults	0.916975	0.67119		CD02	tdTomato	0.887648	0.410179		tdTomato	1.04653	0.589887
RJ01	Juveniles	0.978811	0.435425		Adults	0.919278	0.671647		CD02	tdTomato	0.890506	0.410647		tdTomato	1.04894	0.588638
RJ01	Juveniles	0.981052	0.436032		Adults	0.92158	0.672073		CD02	tdTomato	0.893363	0.411108		tdTomato	1.05135	0.587386
RJ01	Juveniles	0.983293	0.436639		Adults	0.923882	0.672469		CD02	tdTomato	0.896221	0.41156		tdTomato	1.05376	0.586133
RJ01	Juveniles	0.985534	0.437247		Adults	0.926185	0.672835		CD02	tdTomato	0.899078	0.412004		tdTomato	1.05617	0.584877
RJ01	Juveniles	0.987775	0.437856		Adults	0.928487	0.67317		CD02	tdTomato	0.901936	0.412441		tdTomato	1.05858	0.583621
RJ01	Juveniles	0.990016	0.438465		Adults	0.930789	0.673475		CD02	tdTomato	0.904793	0.412869		tdTomato	1.06099	0.582364
RJ01	Juveniles	0.992258	0.439074		Adults	0.933092	0.673751		CD02	tdTomato	0.907651	0.41329		tdTomato	1.0634	0.581107
RJ01	Juveniles	0.994499	0.439684		Adults	0.935394	0.673997		CD02	tdTomato	0.910508	0.413703		tdTomato	1.06581	0.579851
RJ01	Juveniles	0.99674	0.440292		Adults	0.937696	0.674215		CD02	tdTomato	0.913366	0.414107		tdTomato	1.06822	0.578595
RJ01	Juveniles	0.998981	0.440901		Adults	0.939999	0.674404		CD02	tdTomato	0.916223	0.414504		tdTomato	1.07062	0.577341
RJ01	Juveniles	1.00122	0.441508		Adults	0.942301	0.674564		CD02	tdTomato	0.919081	0.414892		tdTomato	1.07303	0.576089
RJ01	Juveniles	1.00346	0.442115		Adults	0.944603	0.674697		CD02	tdTomato	0.921938	0.415273		tdTomato	1.07544	0.57484
RJ01	Juveniles	1.0057	0.442721		Adults	0.946905	0.674802		CD02	tdTomato	0.924796	0.415645		tdTomato	1.07785	0.573593
RJ01	Juveniles	1.00795	0.443325		Adults	0.949208	0.67488		CD02	tdTomato	0.927654	0.41601		tdTomato	1.08026	0.572349
RJ01	Juveniles	1.01019	0.443928		Adults	0.95151	0.674932		CD02	tdTomato	0.930511	0.416366		tdTomato	1.08267	0.57111
RJ01	Juveniles	1.01243	0.444529		Adults	0.953812	0.674957		CD02	tdTomato	0.933369	0.416714		tdTomato	1.08508	0.569874
RJ01	Juveniles	1.01467	0.445128		Adults	0.956115	0.674956		CD02	tdTomato	0.936226	0.417055		tdTomato	1.08749	0.568644
RJ01	Juveniles	1.01691	0.445726		Adults	0.958417	0.67493		CD02	tdTomato	0.939084	0.417387		tdTomato	1.0899	0.567418
RJ01	Juveniles	1.01915	0.44632		Adults	0.960719	0.674879		CD02	tdTomato	0.941941	0.417711		tdTomato	1.09231	0.566199
RJ01	Juveniles	1.02139	0.446913		Adults	0.963022	0.674804		CD02	tdTomato	0.944799	0.418027		tdTomato	1.09472	0.564985
RJ01	Juveniles	1.02363	0.447503		Adults	0.965324	0.674704		CD02	tdTomato	0.947656	0.418335		tdTomato	1.09713	0.563778
RJ01	Juveniles	1.02587	0.44809		Adults	0.967626	0.674581		CD02	tdTomato	0.950514	0.418635		tdTomato	1.09954	0.562578
RJ01	Juveniles	1.02811	0.448674		Adults	0.969929	0.674436		CD02	tdTomato	0.953371	0.418927		tdTomato	1.10194	0.561385
RJ01	Juveniles	1.03036	0.449254		Adults	0.972231	0.674267		CD02	tdTomato	0.956229	0.419211		tdTomato	1.10435	0.5602
RJ01	Juveniles	1.0326	0.449831		Adults	0.974533	0.674077		CD02	tdTomato	0.959086	0.419487		tdTomato	1.10676	0.559024
RJ01	Juveniles	1.03484	0.450405		Adults	0.976836	0.673865		CD02	tdTomato	0.961944	0.419755		tdTomato	1.10917	0.557856
RJ01	Juveniles	1.03708	0.450975		Adults	0.979138	0.673633		CD02	tdTomato	0.964801	0.420015		tdTomato	1.11158	0.556697
RJ01	Juveniles	1.03932	0.451541		Adults	0.98144	0.67338		CD02	tdTomato	0.967659	0.420267		tdTomato	1.11399	0.555548
RJ01	Juveniles	1.04156	0.452103		Adults	0.983742	0.673107		CD02	tdTomato	0.970517	0.420511		tdTomato	1.1164	0.554408
RJ01	Juveniles	1.0438	0.45266		Adults	0.986045	0.672816		CD02	tdTomato	0.973374	0.420747		tdTomato	1.11881	0.553279
RJ01	Juveniles	1.04604	0.453213		Adults	0.988347	0.672505		CD02	tdTomato	0.976232	0.420975		tdTomato	1.12122	0.55216
RJ01	Juveniles	1.04828	0.453761		Adults	0.990649	0.672176		CD02	tdTomato	0.979089	0.421195		tdTomato	1.12363	0.551052
RJ01	Juveniles	1.05053	0.454305		Adults	0.992952	0.67183		CD02	tdTomato	0.981947	0.421407		tdTomato	1.12604	0.549955
RJ01	Juveniles	1.05277	0.454843		Adults	0.995254	0.671467		CD02	tdTomato	0.984804	0.421612		tdTomato	1.12845	0.54887
RJ01	Juveniles	1.05501	0.455376		Adults	0.997556	0.671087		CD02	tdTomato	0.987662	0.421809		tdTomato	1.13086	0.547797
RJ01	Juveniles	1.05725	0.455904		Adults	0.999859	0.670692		CD02	tdTomato	0.990519	0.421998		tdTomato	1.13327	0.546737
RJ01	Juveniles	1.05949	0.456426		Adults	1.00216	0.670281		CD02	tdTomato	0.993377	0.422179		tdTomato	1.13567	0.545689
RJ01	Juveniles	1.06173	0.456943		Adults	1.00446	0.669856		CD02	tdTomato	0.996234	0.422352		tdTomato	1.13808	0.544653
RJ01	Juveniles	1.06397	0.457454		Adults	1.00677	0.669416		CD02	tdTomato	0.999092	0.422518		tdTomato	1.14049	0.543631
RJ01	Juveniles	1.06621	0.457959		Adults	1.00907	0.668963		CD02	tdTomato	1.00195	0.422676		tdTomato	1.1429	0.542623
RJ01	Juveniles	1.06845	0.458457		Adults	1.01137	0.668497		CD02	tdTomato	1.00481	0.422827		tdTomato	1.14531	0.541628
RJ01	Juveniles	1.07069	0.458949		Adults	1.01367	0.668018		CD02	tdTomato	1.00766	0.42297		tdTomato	1.14772	0.540648
RJ01	Juveniles	1.07294	0.459435		Adults	1.01597	0.667528		CD02	tdTomato	1.01052	0.423105		tdTomato	1.15013	0.539681
RJ01	Juveniles	1.07518	0.459914		Adults	1.01828	0.667026		CD02	tdTomato	1.01338	0.423233		tdTomato	1.15254	0.53873
RJ01	Juveniles	1.07742	0.460386		Adults	1.02058	0.666513		CD02	tdTomato	1.01624	0.423354		tdTomato	1.15495	0.537793
RJ01	Juveniles	1.07966	0.460852		Adults	1.02288	0.665991		CD02	tdTomato	1.01909	0.423467		tdTomato	1.15736	0.536871
RJ01	Juveniles	1.0819	0.46131		Adults	1.02518	0.665458		CD02	tdTomato	1.02195	0.423573		tdTomato	1.15977	0.535964
RJ01	Juveniles	1.08414	0.461761		Adults	1.02749	0.664916		CD02	tdTomato	1.02481	0.423671		tdTomato	1.16218	0.535073
RJ01	Juveniles	1.08638	0.462204		Adults	1.02979	0.664366		CD02	tdTomato	1.02767	0.423762		tdTomato	1.16459	0.534197
RJ01	Juveniles	1.08862	0.462641		Adults	1.03209	0.663808		CD02	tdTomato	1.03052	0.423846		tdTomato	1.16699	0.533338
RJ01	Juveniles	1.09086	0.463069		Adults	1.03439	0.663242		CD02	tdTomato	1.03338	0.423923		tdTomato	1.1694	0.532494
RJ01	Juveniles	1.09311	0.463489		Adults	1.0367	0.662668		CD02	tdTomato	1.03624	0.423992		tdTomato	1.17181	0.531667
RJ01	Juveniles	1.09535	0.463902		Adults	1.039	0.662089		CD02	tdTomato	1.0391	0.424055		tdTomato	1.17422	0.530856
RJ01	Juveniles	1.09759	0.464307		Adults	1.0413	0.661503		CD02	tdTomato	1.04195	0.42411		tdTomato	1.17663	0.530062
RJ01	Juveniles	1.09983	0.464703		Adults	1.0436	0.660911		CD02	tdTomato	1.04481	0.424159		tdTomato	1.17904	0.529284
RJ01	Juveniles	1.10207	0.465091		Adults	1.0459	0.660314		CD02	tdTomato	1.04767	0.4242		tdTomato	1.18145	0.528523
RJ01	Juveniles	1.10431	0.46547		Adults	1.04821	0.659712		CD02	tdTomato	1.05053	0.424235		tdTomato	1.18386	0.527779
RJ01	Juveniles	1.10655	0.465841		Adults	1.05051	0.659106		CD02	tdTomato	1.05338	0.424263		tdTomato	1.18627	0.527052
RJ01	Juveniles	1.10879	0.466203		Adults	1.05281	0.658496		CD02	tdTomato	1.05624	0.424284		tdTomato	1.18868	0.526342
RJ01	Juveniles	1.11103	0.466556		Adults	1.05511	0.657883		CD02	tdTomato	1.0591	0.424299		tdTomato	1.19109	0.525649
RJ01	Juveniles	1.11328	0.466901		Adults	1.05742	0.657266		CD02	tdTomato	1.06196	0.424307		tdTomato	1.1935	0.524973
RJ01	Juveniles	1.11552	0.467236		Adults	1.05972	0.656647		CD02	tdTomato	1.06482	0.424308		tdTomato	1.19591	0.524315
RJ01	Juveniles	1.11776	0.467562		Adults	1.06202	0.656025		CD02	tdTomato	1.06767	0.424303		tdTomato	1.19832	0.523674
RJ01	Juveniles	1.12	0.467879		Adults	1.06432	0.655401		CD02	tdTomato	1.07053	0.424291		tdTomato	1.20072	0.523051
RJ01	Juveniles	1.12224	0.468186		Adults	1.06663	0.654776		CD02	tdTomato	1.07339	0.424274		tdTomato	1.20313	0.522445
RJ01	Juveniles	1.12448	0.468483		Adults	1.06893	0.654149		CD02	tdTomato	1.07625	0.424249		tdTomato	1.20554	0.521856
RJ01	Juveniles	1.12672	0.468771		Adults	1.07123	0.653521		CD02	tdTomato	1.0791	0.424219		tdTomato	1.20795	0.521285
RJ01	Juveniles	1.12896	0.46905		Adults	1.07353	0.652892		CD02	tdTomato	1.08196	0.424183		tdTomato	1.21036	0.520732
RJ01	Juveniles	1.1312	0.469318		Adults	1.07584	0.652263		CD02	tdTomato	1.08482	0.42414		tdTomato	1.21277	0.520196
RJ01	Juveniles	1.13344	0.469577		Adults	1.07814	0.651633		CD02	tdTomato	1.08768	0.424091		tdTomato	1.21518	0.519677
RJ01	Juveniles	1.13569	0.469825		Adults	1.08044	0.651004		CD02	tdTomato	1.09053	0.424037		tdTomato	1.21759	0.519175
RJ01	Juveniles	1.13793	0.470063		Adults	1.08274	0.650374		CD02	tdTomato	1.09339	0.423976		tdTomato	1.22	0.518691
RJ01	Juveniles	1.14017	0.470292		Adults	1.08504	0.649745		CD02	tdTomato	1.09625	0.42391		tdTomato	1.22241	0.518224
RJ01	Juveniles	1.14241	0.470509		Adults	1.08735	0.649117		CD02	tdTomato	1.09911	0.423838		tdTomato	1.22482	0.517775
RJ01	Juveniles	1.14465	0.470717		Adults	1.08965	0.648489		CD02	tdTomato	1.10196	0.423761		tdTomato	1.22723	0.517342
RJ01	Juveniles	1.14689	0.470913		Adults	1.09195	0.647863		CD02	tdTomato	1.10482	0.423678		tdTomato	1.22964	0.516927
RJ01	Juveniles	1.14913	0.4711		Adults	1.09425	0.647237		CD02	tdTomato	1.10768	0.423589		tdTomato	1.23204	0.516528
RJ01	Juveniles	1.15137	0.471275		Adults	1.09656	0.646613		CD02	tdTomato	1.11054	0.423495		tdTomato	1.23445	0.516146
RJ01	Juveniles	1.15361	0.47144		Adults	1.09886	0.64599		CD02	tdTomato	1.11339	0.423395		tdTomato	1.23686	0.515781
RJ01	Juveniles	1.15586	0.471594		Adults	1.10116	0.645368		CD02	tdTomato	1.11625	0.423291		tdTomato	1.23927	0.515432
RJ01	Juveniles	1.1581	0.471737		Adults	1.10346	0.644748		CD02	tdTomato	1.11911	0.423181		tdTomato	1.24168	0.5151
RJ01	Juveniles	1.16034	0.471869		Adults	1.10577	0.644129		CD02	tdTomato	1.12197	0.423066		tdTomato	1.24409	0.514784
RJ01	Juveniles	1.16258	0.47199		Adults	1.10807	0.643512		CD02	tdTomato	1.12482	0.422946		tdTomato	1.2465	0.514484
RJ01	Juveniles	1.16482	0.4721		Adults	1.11037	0.642897		CD02	tdTomato	1.12768	0.422821		tdTomato	1.24891	0.514199
RJ01	Juveniles	1.16706	0.472198		Adults	1.11267	0.642283		CD02	tdTomato	1.13054	0.422691		tdTomato	1.25132	0.513931
RJ01	Juveniles	1.1693	0.472286		Adults	1.11497	0.641671		CD02	tdTomato	1.1334	0.422557		tdTomato	1.25373	0.513678
RJ01	Juveniles	1.17154	0.472362		Adults	1.11728	0.641061		CD02	tdTomato	1.13625	0.422418		tdTomato	1.25614	0.51344
RJ01	Juveniles	1.17378	0.472426		Adults	1.11958	0.640453		CD02	tdTomato	1.13911	0.422274		tdTomato	1.25855	0.513218
RJ01	Juveniles	1.17602	0.47248		Adults	1.12188	0.639846		CD02	tdTomato	1.14197	0.422125		tdTomato	1.26096	0.51301
RJ01	Juveniles	1.17827	0.472522		Adults	1.12418	0.63924		CD02	tdTomato	1.14483	0.421972		tdTomato	1.26337	0.512817
RJ01	Juveniles	1.18051	0.472552		Adults	1.12649	0.638636		CD02	tdTomato	1.14768	0.421815		tdTomato	1.26577	0.512638
RJ01	Juveniles	1.18275	0.47257		Adults	1.12879	0.638034		CD02	tdTomato	1.15054	0.421654		tdTomato	1.26818	0.512473
RJ01	Juveniles	1.18499	0.472577		Adults	1.13109	0.637433		CD02	tdTomato	1.1534	0.421488		tdTomato	1.27059	0.512322
RJ01	Juveniles	1.18723	0.472573		Adults	1.13339	0.636833		CD02	tdTomato	1.15626	0.421318		tdTomato	1.273	0.512185
RJ01	Juveniles	1.18947	0.472556		Adults	1.1357	0.636234		CD02	tdTomato	1.15911	0.421144		tdTomato	1.27541	0.512061
RJ01	Juveniles	1.19171	0.472528		Adults	1.138	0.635637		CD02	tdTomato	1.16197	0.420966		tdTomato	1.27782	0.51195
RJ01	Juveniles	1.19395	0.472488		Adults	1.1403	0.63504		CD02	tdTomato	1.16483	0.420785		tdTomato	1.28023	0.511852
RJ01	Juveniles	1.19619	0.472436		Adults	1.1426	0.634444		CD02	tdTomato	1.16769	0.420599		tdTomato	1.28264	0.511766
RJ01	Juveniles	1.19844	0.472372		Adults	1.1449	0.633849		CD02	tdTomato	1.17054	0.42041		tdTomato	1.28505	0.511692
RJ01	Juveniles	1.20068	0.472297		Adults	1.14721	0.633254		CD02	tdTomato	1.1734	0.420217		tdTomato	1.28746	0.51163
RJ01	Juveniles	1.20292	0.472209		Adults	1.14951	0.63266		CD02	tdTomato	1.17626	0.420021		tdTomato	1.28987	0.511579
RJ01	Juveniles	1.20516	0.472109		Adults	1.15181	0.632066		CD02	tdTomato	1.17912	0.419821		tdTomato	1.29228	0.51154
RJ01	Juveniles	1.2074	0.471998		Adults	1.15411	0.631472		CD02	tdTomato	1.18197	0.419618		tdTomato	1.29469	0.511511
RJ01	Juveniles	1.20964	0.471874		Adults	1.15642	0.630877		CD02	tdTomato	1.18483	0.419412		tdTomato	1.29709	0.511493
RJ01	Juveniles	1.21188	0.471738		Adults	1.15872	0.630283		CD02	tdTomato	1.18769	0.419202		tdTomato	1.2995	0.511485
RJ01	Juveniles	1.21412	0.47159		Adults	1.16102	0.629688		CD02	tdTomato	1.19055	0.418989		tdTomato	1.30191	0.511487
RJ01	Juveniles	1.21636	0.47143		Adults	1.16332	0.629092		CD02	tdTomato	1.1934	0.418774		tdTomato	1.30432	0.511497
RJ01	Juveniles	1.21861	0.471258		Adults	1.16563	0.628496		CD02	tdTomato	1.19626	0.418555		tdTomato	1.30673	0.511517
RJ01	Juveniles	1.22085	0.471074		Adults	1.16793	0.627898		CD02	tdTomato	1.19912	0.418334		tdTomato	1.30914	0.511546
RJ01	Juveniles	1.22309	0.470878		Adults	1.17023	0.627299		CD02	tdTomato	1.20198	0.418109		tdTomato	1.31155	0.511583
RJ01	Juveniles	1.22533	0.470669		Adults	1.17253	0.626699		CD02	tdTomato	1.20483	0.417883		tdTomato	1.31396	0.511627
RJ01	Juveniles	1.22757	0.470448		Adults	1.17483	0.626097		CD02	tdTomato	1.20769	0.417653		tdTomato	1.31637	0.511679
RJ01	Juveniles	1.22981	0.470215		Adults	1.17714	0.625494		CD02	tdTomato	1.21055	0.417421		tdTomato	1.31878	0.511738
RJ01	Juveniles	1.23205	0.46997		Adults	1.17944	0.624888		CD02	tdTomato	1.21341	0.417187		tdTomato	1.32119	0.511804
RJ01	Juveniles	1.23429	0.469713		Adults	1.18174	0.62428		CD02	tdTomato	1.21626	0.41695		tdTomato	1.3236	0.511876
RJ01	Juveniles	1.23653	0.469443		Adults	1.18404	0.62367		CD02	tdTomato	1.21912	0.416711		tdTomato	1.32601	0.511954
RJ01	Juveniles	1.23877	0.469162		Adults	1.18635	0.623057		CD02	tdTomato	1.22198	0.41647		tdTomato	1.32842	0.512038
RJ01	Juveniles	1.24102	0.468868		Adults	1.18865	0.622441		CD02	tdTomato	1.22484	0.416227		tdTomato	1.33082	0.512126
RJ01	Juveniles	1.24326	0.468562		Adults	1.19095	0.621822		CD02	tdTomato	1.22769	0.415981		tdTomato	1.33323	0.512219
RJ01	Juveniles	1.2455	0.468244		Adults	1.19325	0.621201		CD02	tdTomato	1.23055	0.415734		tdTomato	1.33564	0.512316
RJ01	Juveniles	1.24774	0.467913		Adults	1.19556	0.620576		CD02	tdTomato	1.23341	0.415485		tdTomato	1.33805	0.512417
RJ01	Juveniles	1.24998	0.467571		Adults	1.19786	0.619947		CD02	tdTomato	1.23627	0.415234		tdTomato	1.34046	0.512521
RJ01	Juveniles	1.25222	0.467216		Adults	1.20016	0.619315		CD02	tdTomato	1.23912	0.414982		tdTomato	1.34287	0.512628
RJ01	Juveniles	1.25446	0.466849		Adults	1.20246	0.618679		CD02	tdTomato	1.24198	0.414728		tdTomato	1.34528	0.512738
RJ01	Juveniles	1.2567	0.46647		Adults	1.20476	0.618039		CD02	tdTomato	1.24484	0.414472		tdTomato	1.34769	0.51285
RJ01	Juveniles	1.25894	0.466079		Adults	1.20707	0.617394		CD02	tdTomato	1.2477	0.414215		tdTomato	1.3501	0.512963
RJ01	Juveniles	1.26119	0.465676		Adults	1.20937	0.616746		CD02	tdTomato	1.25055	0.413957		tdTomato	1.35251	0.513078
RJ01	Juveniles	1.26343	0.465261		Adults	1.21167	0.616093		CD02	tdTomato	1.25341	0.413697		tdTomato	1.35492	0.513194
RJ01	Juveniles	1.26567	0.464834		Adults	1.21397	0.615436		CD02	tdTomato	1.25627	0.413436		tdTomato	1.35733	0.513309
RJ01	Juveniles	1.26791	0.464395		Adults	1.21628	0.614773		CD02	tdTomato	1.25913	0.413174		tdTomato	1.35974	0.513425
RJ01	Juveniles	1.27015	0.463944		Adults	1.21858	0.614106		CD02	tdTomato	1.26198	0.412911		tdTomato	1.36214	0.51354
RJ01	Juveniles	1.27239	0.463481		Adults	1.22088	0.613435		CD02	tdTomato	1.26484	0.412647		tdTomato	1.36455	0.513655
RJ01	Juveniles	1.27463	0.463006		Adults	1.22318	0.612758		CD02	tdTomato	1.2677	0.412382		tdTomato	1.36696	0.513768
RJ01	Juveniles	1.27687	0.462519		Adults	1.22549	0.612076		CD02	tdTomato	1.27056	0.412117		tdTomato	1.36937	0.513879
RJ01	Juveniles	1.27911	0.46202		Adults	1.22779	0.611389		CD02	tdTomato	1.27341	0.41185		tdTomato	1.37178	0.513988
RJ01	Juveniles	1.28136	0.46151		Adults	1.23009	0.610696		CD02	tdTomato	1.27627	0.411583		tdTomato	1.37419	0.514094
RJ01	Juveniles	1.2836	0.460987		Adults	1.23239	0.609998		CD02	tdTomato	1.27913	0.411315		tdTomato	1.3766	0.514198
RJ01	Juveniles	1.28584	0.460453		Adults	1.23469	0.609295		CD02	tdTomato	1.28199	0.411047		tdTomato	1.37901	0.514298
RJ01	Juveniles	1.28808	0.459908		Adults	1.237	0.608586		CD02	tdTomato	1.28485	0.410778		tdTomato	1.38142	0.514394
RJ01	Juveniles	1.29032	0.45935		Adults	1.2393	0.607872		CD02	tdTomato	1.2877	0.410509		tdTomato	1.38383	0.514486
RJ01	Juveniles	1.29256	0.458781		Adults	1.2416	0.607152		CD02	tdTomato	1.29056	0.41024		tdTomato	1.38624	0.514573
RJ01	Juveniles	1.2948	0.458201		Adults	1.2439	0.606426		CD02	tdTomato	1.29342	0.40997		tdTomato	1.38865	0.514655
RJ01	Juveniles	1.29704	0.457609		Adults	1.24621	0.605695		CD02	tdTomato	1.29628	0.4097		tdTomato	1.39106	0.514731
RJ01	Juveniles	1.29928	0.457005		Adults	1.24851	0.604958		CD02	tdTomato	1.29913	0.40943		tdTomato	1.39347	0.514802
RJ01	Juveniles	1.30152	0.45639		Adults	1.25081	0.604216		CD02	tdTomato	1.30199	0.40916		tdTomato	1.39587	0.514866
RJ01	Juveniles	1.30377	0.455764		Adults	1.25311	0.603468		CD02	tdTomato	1.30485	0.40889		tdTomato	1.39828	0.514924
RJ01	Juveniles	1.30601	0.455126		Adults	1.25542	0.602714		CD02	tdTomato	1.30771	0.40862		tdTomato	1.40069	0.514975
RJ01	Juveniles	1.30825	0.454477		Adults	1.25772	0.601954		CD02	tdTomato	1.31056	0.40835		tdTomato	1.4031	0.515018
RJ01	Juveniles	1.31049	0.453817		Adults	1.26002	0.601189		CD02	tdTomato	1.31342	0.40808		tdTomato	1.40551	0.515053
RJ01	Juveniles	1.31273	0.453146		Adults	1.26232	0.600418		CD02	tdTomato	1.31628	0.407811		tdTomato	1.40792	0.515081
RJ01	Juveniles	1.31497	0.452464		Adults	1.26462	0.599642		CD02	tdTomato	1.31914	0.407542		tdTomato	1.41033	0.515099
RJ01	Juveniles	1.31721	0.45177		Adults	1.26693	0.59886		CD02	tdTomato	1.32199	0.407273		tdTomato	1.41274	0.515109
RJ01	Juveniles	1.31945	0.451066		Adults	1.26923	0.598073		CD02	tdTomato	1.32485	0.407005		tdTomato	1.41515	0.51511
RJ01	Juveniles	1.32169	0.450351		Adults	1.27153	0.59728		CD02	tdTomato	1.32771	0.406737		tdTomato	1.41756	0.515101
RJ01	Juveniles	1.32394	0.449625		Adults	1.27383	0.596482		CD02	tdTomato	1.33057	0.40647		tdTomato	1.41997	0.515081
RJ01	Juveniles	1.32618	0.448888		Adults	1.27614	0.595678		CD02	tdTomato	1.33342	0.406204		tdTomato	1.42238	0.515052
RJ01	Juveniles	1.32842	0.44814		Adults	1.27844	0.594869		CD02	tdTomato	1.33628	0.405938		tdTomato	1.42479	0.515012
RJ01	Juveniles	1.33066	0.447382		Adults	1.28074	0.594055		CD02	tdTomato	1.33914	0.405672		tdTomato	1.42719	0.514961
RJ01	Juveniles	1.3329	0.446614		Adults	1.28304	0.593236		CD02	tdTomato	1.342	0.405408		tdTomato	1.4296	0.514899
RJ01	Juveniles	1.33514	0.445835		Adults	1.28535	0.592412		CD02	tdTomato	1.34485	0.405144		tdTomato	1.43201	0.514825
RJ01	Juveniles	1.33738	0.445045		Adults	1.28765	0.591583		CD02	tdTomato	1.34771	0.404882		tdTomato	1.43442	0.51474
RJ01	Juveniles	1.33962	0.444245		Adults	1.28995	0.590749		CD02	tdTomato	1.35057	0.40462		tdTomato	1.43683	0.514642
RJ01	Juveniles	1.34186	0.443435		Adults	1.29225	0.58991		CD02	tdTomato	1.35343	0.404359		tdTomato	1.43924	0.514531
RJ01	Juveniles	1.3441	0.442615		Adults	1.29455	0.589067		CD02	tdTomato	1.35628	0.404099		tdTomato	1.44165	0.514408
RJ01	Juveniles	1.34635	0.441784		Adults	1.29686	0.588219		CD02	tdTomato	1.35914	0.403841		tdTomato	1.44406	0.514272
RJ01	Juveniles	1.34859	0.440944		Adults	1.29916	0.587366		CD02	tdTomato	1.362	0.403583		tdTomato	1.44647	0.514123
RJ01	Juveniles	1.35083	0.440093		Adults	1.30146	0.58651		CD02	tdTomato	1.36486	0.403327		tdTomato	1.44888	0.51396
RJ01	Juveniles	1.35307	0.439233		Adults	1.30376	0.585649		CD02	tdTomato	1.36771	0.403071		tdTomato	1.45129	0.513783
RJ01	Juveniles	1.35531	0.438363		Adults	1.30607	0.584784		CD02	tdTomato	1.37057	0.402817		tdTomato	1.4537	0.513592
RJ01	Juveniles	1.35755	0.437483		Adults	1.30837	0.583914		CD02	tdTomato	1.37343	0.402565		tdTomato	1.45611	0.513387
RJ01	Juveniles	1.35979	0.436594		Adults	1.31067	0.583041		CD02	tdTomato	1.37629	0.402313		tdTomato	1.45852	0.513168
RJ01	Juveniles	1.36203	0.435695		Adults	1.31297	0.582165		CD02	tdTomato	1.37914	0.402063		tdTomato	1.46092	0.512933
RJ01	Juveniles	1.36427	0.434787		Adults	1.31528	0.581284		CD02	tdTomato	1.382	0.401814		tdTomato	1.46333	0.512684
RJ01	Juveniles	1.36652	0.433869		Adults	1.31758	0.5804		CD02	tdTomato	1.38486	0.401567		tdTomato	1.46574	0.512419
RJ01	Juveniles	1.36876	0.432942		Adults	1.31988	0.579512		CD02	tdTomato	1.38772	0.401321		tdTomato	1.46815	0.512139
RJ01	Juveniles	1.371	0.432006		Adults	1.32218	0.578621		CD02	tdTomato	1.39057	0.401077		tdTomato	1.47056	0.511844
RJ01	Juveniles	1.37324	0.431061		Adults	1.32448	0.577727		CD02	tdTomato	1.39343	0.400834		tdTomato	1.47297	0.511533
RJ01	Juveniles	1.37548	0.430107		Adults	1.32679	0.576829		CD02	tdTomato	1.39629	0.400593		tdTomato	1.47538	0.511205
RJ01	Juveniles	1.37772	0.429144		Adults	1.32909	0.575929		CD02	tdTomato	1.39915	0.400354		tdTomato	1.47779	0.510862
RJ01	Juveniles	1.37996	0.428172		Adults	1.33139	0.575026		CD02	tdTomato	1.402	0.400116		tdTomato	1.4802	0.510503
RJ01	Juveniles	1.3822	0.427192		Adults	1.33369	0.574119		CD02	tdTomato	1.40486	0.399879		tdTomato	1.48261	0.510127
RJ01	Juveniles	1.38444	0.426203		Adults	1.336	0.57321		CD02	tdTomato	1.40772	0.399645		tdTomato	1.48502	0.509734
RJ01	Juveniles	1.38669	0.425205		Adults	1.3383	0.572298		CD02	tdTomato	1.41058	0.399412		tdTomato	1.48743	0.509325
RJ01	Juveniles	1.38893	0.424199		Adults	1.3406	0.571384		CD02	tdTomato	1.41343	0.39918		tdTomato	1.48984	0.508899
RJ01	Juveniles	1.39117	0.423185		Adults	1.3429	0.570467		CD02	tdTomato	1.41629	0.398951		tdTomato	1.49224	0.508456
RJ01	Juveniles	1.39341	0.422162		Adults	1.34521	0.569548		CD02	tdTomato	1.41915	0.398723		tdTomato	1.49465	0.507996
RJ01	Juveniles	1.39565	0.421132		Adults	1.34751	0.568627		CD02	tdTomato	1.42201	0.398497		tdTomato	1.49706	0.507519
RJ01	Juveniles	1.39789	0.420093		Adults	1.34981	0.567703		CD02	tdTomato	1.42486	0.398273		tdTomato	1.49947	0.507025
RJ01	Juveniles	1.40013	0.419047		Adults	1.35211	0.566777		CD02	tdTomato	1.42772	0.398051		tdTomato	1.50188	0.506513
RJ01	Juveniles	1.40237	0.417993		Adults	1.35441	0.565849		CD02	tdTomato	1.43058	0.39783		tdTomato	1.50429	0.505984
RJ01	Juveniles	1.40461	0.416931		Adults	1.35672	0.564919		CD02	tdTomato	1.43344	0.397612		tdTomato	1.5067	0.505437
RJ01	Juveniles	1.40685	0.415861		Adults	1.35902	0.563987		CD02	tdTomato	1.43629	0.397395		tdTomato	1.50911	0.504873
RJ01	Juveniles	1.4091	0.414784		Adults	1.36132	0.563053		CD02	tdTomato	1.43915	0.39718		tdTomato	1.51152	0.504291
RJ01	Juveniles	1.41134	0.4137		Adults	1.36362	0.562118		CD02	tdTomato	1.44201	0.396967		tdTomato	1.51393	0.503692
RJ01	Juveniles	1.41358	0.412609		Adults	1.36593	0.56118		CD02	tdTomato	1.44487	0.396756		tdTomato	1.51634	0.503075
RJ01	Juveniles	1.41582	0.41151		Adults	1.36823	0.560241		CD02	tdTomato	1.44772	0.396547		tdTomato	1.51875	0.50244
RJ01	Juveniles	1.41806	0.410404		Adults	1.37053	0.5593		CD02	tdTomato	1.45058	0.39634		tdTomato	1.52116	0.501787
RJ01	Juveniles	1.4203	0.409291		Adults	1.37283	0.558357		CD02	tdTomato	1.45344	0.396134		tdTomato	1.52357	0.501117
RJ01	Juveniles	1.42254	0.408172		Adults	1.37514	0.557413		CD02	tdTomato	1.4563	0.395931		tdTomato	1.52597	0.500429
RJ01	Juveniles	1.42478	0.407046		Adults	1.37744	0.556467		CD02	tdTomato	1.45915	0.39573		tdTomato	1.52838	0.499723
RJ01	Juveniles	1.42702	0.405913		Adults	1.37974	0.555519		CD02	tdTomato	1.46201	0.39553		tdTomato	1.53079	0.498999
RJ01	Juveniles	1.42927	0.404774		Adults	1.38204	0.55457		CD02	tdTomato	1.46487	0.395333		tdTomato	1.5332	0.498257
RJ01	Juveniles	1.43151	0.403628		Adults	1.38434	0.553619		CD02	tdTomato	1.46773	0.395137		tdTomato	1.53561	0.497498
RJ01	Juveniles	1.43375	0.402476		Adults	1.38665	0.552667		CD02	tdTomato	1.47058	0.394943		tdTomato	1.53802	0.496721
RJ01	Juveniles	1.43599	0.401318		Adults	1.38895	0.551713		CD02	tdTomato	1.47344	0.394752		tdTomato	1.54043	0.495926
RJ01	Juveniles	1.43823	0.400154		Adults	1.39125	0.550757		CD02	tdTomato	1.4763	0.394562		tdTomato	1.54284	0.495114
RJ01	Juveniles	1.44047	0.398984		Adults	1.39355	0.5498		CD02	tdTomato	1.47916	0.394374		tdTomato	1.54525	0.494284
RJ01	Juveniles	1.44271	0.397809		Adults	1.39586	0.548841		CD02	tdTomato	1.48201	0.394188		tdTomato	1.54766	0.493437
RJ01	Juveniles	1.44495	0.396627		Adults	1.39816	0.54788		CD02	tdTomato	1.48487	0.394004		tdTomato	1.55007	0.492572
RJ01	Juveniles	1.44719	0.39544		Adults	1.40046	0.546918		CD02	tdTomato	1.48773	0.393822		tdTomato	1.55248	0.491689
RJ01	Juveniles	1.44944	0.394248		Adults	1.40276	0.545954		CD02	tdTomato	1.49059	0.393642		tdTomato	1.55489	0.49079
RJ01	Juveniles	1.45168	0.39305		Adults	1.40507	0.544989		CD02	tdTomato	1.49344	0.393464		tdTomato	1.55729	0.489873
RJ01	Juveniles	1.45392	0.391847		Adults	1.40737	0.544022		CD02	tdTomato	1.4963	0.393288		tdTomato	1.5597	0.488938
RJ01	Juveniles	1.45616	0.390639		Adults	1.40967	0.543052		CD02	tdTomato	1.49916	0.393114		tdTomato	1.56211	0.487987
RJ01	Juveniles	1.4584	0.389426		Adults	1.41197	0.542081		CD02	tdTomato	1.50202	0.392941		tdTomato	1.56452	0.487019
RJ01	Juveniles	1.46064	0.388208		Adults	1.41428	0.541109		CD02	tdTomato	1.50487	0.39277		tdTomato	1.56693	0.486034
RJ01	Juveniles	1.46288	0.386986		Adults	1.41658	0.540134		CD02	tdTomato	1.50773	0.392602		tdTomato	1.56934	0.485032
RJ01	Juveniles	1.46512	0.385759		Adults	1.41888	0.539157		CD02	tdTomato	1.51059	0.392435		tdTomato	1.57175	0.484013
RJ01	Juveniles	1.46736	0.384527		Adults	1.42118	0.538178		CD02	tdTomato	1.51345	0.392269		tdTomato	1.57416	0.482978
RJ01	Juveniles	1.4696	0.383291		Adults	1.42348	0.537197		CD02	tdTomato	1.51631	0.392106		tdTomato	1.57657	0.481926
RJ01	Juveniles	1.47185	0.382051		Adults	1.42579	0.536214		CD02	tdTomato	1.51916	0.391944		tdTomato	1.57898	0.480858
RJ01	Juveniles	1.47409	0.380806		Adults	1.42809	0.535228		CD02	tdTomato	1.52202	0.391785		tdTomato	1.58139	0.479774
RJ01	Juveniles	1.47633	0.379558		Adults	1.43039	0.53424		CD02	tdTomato	1.52488	0.391627		tdTomato	1.5838	0.478674
RJ01	Juveniles	1.47857	0.378305		Adults	1.43269	0.53325		CD02	tdTomato	1.52774	0.39147		tdTomato	1.58621	0.477559
RJ01	Juveniles	1.48081	0.377049		Adults	1.435	0.532257		CD02	tdTomato	1.53059	0.391316		tdTomato	1.58862	0.476427
RJ01	Juveniles	1.48305	0.375789		Adults	1.4373	0.531262		CD02	tdTomato	1.53345	0.391163		tdTomato	1.59102	0.47528
RJ01	Juveniles	1.48529	0.374526		Adults	1.4396	0.530264		CD02	tdTomato	1.53631	0.391011		tdTomato	1.59343	0.474118
RJ01	Juveniles	1.48753	0.373259		Adults	1.4419	0.529263		CD02	tdTomato	1.53917	0.390861		tdTomato	1.59584	0.47294
RJ01	Juveniles	1.48977	0.371989		Adults	1.44421	0.52826		CD02	tdTomato	1.54202	0.390713		tdTomato	1.59825	0.471748
RJ01	Juveniles	1.49202	0.370716		Adults	1.44651	0.527253		CD02	tdTomato	1.54488	0.390567		tdTomato	1.60066	0.47054
RJ01	Juveniles	1.49426	0.36944		Adults	1.44881	0.526244		CD02	tdTomato	1.54774	0.390422		tdTomato	1.60307	0.469318
RJ01	Juveniles	1.4965	0.368161		Adults	1.45111	0.525231		CD02	tdTomato	1.5506	0.390278		tdTomato	1.60548	0.468082
RJ01	Juveniles	1.49874	0.366879		Adults	1.45341	0.524215		CD02	tdTomato	1.55345	0.390136		tdTomato	1.60789	0.466831
RJ01	Juveniles	1.50098	0.365594		Adults	1.45572	0.523196		CD02	tdTomato	1.55631	0.389996		tdTomato	1.6103	0.465566
RJ01	Juveniles	1.50322	0.364307		Adults	1.45802	0.522174		CD02	tdTomato	1.55917	0.389857		tdTomato	1.61271	0.464287
RJ01	Juveniles	1.50546	0.363017		Adults	1.46032	0.521148		CD02	tdTomato	1.56203	0.389719		tdTomato	1.61512	0.462995
RJ01	Juveniles	1.5077	0.361726		Adults	1.46262	0.520118		CD02	tdTomato	1.56488	0.389582		tdTomato	1.61753	0.461689
RJ01	Juveniles	1.50994	0.360431		Adults	1.46493	0.519085		CD02	tdTomato	1.56774	0.389447		tdTomato	1.61994	0.46037
RJ01	Juveniles	1.51218	0.359135		Adults	1.46723	0.518047		CD02	tdTomato	1.5706	0.389313		tdTomato	1.62234	0.459038
RJ01	Juveniles	1.51443	0.357837		Adults	1.46953	0.517006		CD02	tdTomato	1.57346	0.389181		tdTomato	1.62475	0.457693
RJ01	Juveniles	1.51667	0.356537		Adults	1.47183	0.515961		CD02	tdTomato	1.57631	0.38905		tdTomato	1.62716	0.456336
RJ01	Juveniles	1.51891	0.355235		Adults	1.47414	0.514912		CD02	tdTomato	1.57917	0.388919		tdTomato	1.62957	0.454966
RJ01	Juveniles	1.52115	0.353932		Adults	1.47644	0.513858		CD02	tdTomato	1.58203	0.38879		tdTomato	1.63198	0.453584
RJ01	Juveniles	1.52339	0.352627		Adults	1.47874	0.5128		CD02	tdTomato	1.58489	0.388662		tdTomato	1.63439	0.45219
RJ01	Juveniles	1.52563	0.351321		Adults	1.48104	0.511737		CD02	tdTomato	1.58774	0.388535		tdTomato	1.6368	0.450784
RJ01	Juveniles	1.52787	0.350014		Adults	1.48334	0.51067		CD02	tdTomato	1.5906	0.38841		tdTomato	1.63921	0.449367
RJ01	Juveniles	1.53011	0.348705		Adults	1.48565	0.509599		CD02	tdTomato	1.59346	0.388285		tdTomato	1.64162	0.447939
RJ01	Juveniles	1.53235	0.347396		Adults	1.48795	0.508522		CD02	tdTomato	1.59632	0.388161		tdTomato	1.64403	0.4465
RJ01	Juveniles	1.5346	0.346085		Adults	1.49025	0.50744		CD02	tdTomato	1.59917	0.388038		tdTomato	1.64644	0.445051
RJ01	Juveniles	1.53684	0.344774		Adults	1.49255	0.506354		CD02	tdTomato	1.60203	0.387915		tdTomato	1.64885	0.44359
RJ01	Juveniles	1.53908	0.343462		Adults	1.49486	0.505262		CD02	tdTomato	1.60489	0.387794		tdTomato	1.65126	0.44212
RJ01	Juveniles	1.54132	0.34215		Adults	1.49716	0.504165		CD02	tdTomato	1.60775	0.387673		tdTomato	1.65367	0.44064
RJ01	Juveniles	1.54356	0.340837		Adults	1.49946	0.503063		CD02	tdTomato	1.6106	0.387553		tdTomato	1.65607	0.43915
RJ01	Juveniles	1.5458	0.339524		Adults	1.50176	0.501955		CD02	tdTomato	1.61346	0.387434		tdTomato	1.65848	0.43765
RJ01	Juveniles	1.54804	0.338211		Adults	1.50407	0.500841		CD02	tdTomato	1.61632	0.387315		tdTomato	1.66089	0.436142
RJ01	Juveniles	1.55028	0.336898		Adults	1.50637	0.499722		CD02	tdTomato	1.61918	0.387197		tdTomato	1.6633	0.434624
RJ01	Juveniles	1.55252	0.335585		Adults	1.50867	0.498596		CD02	tdTomato	1.62203	0.38708		tdTomato	1.66571	0.433098
RJ01	Juveniles	1.55477	0.334272		Adults	1.51097	0.497465		CD02	tdTomato	1.62489	0.386963		tdTomato	1.66812	0.431563
RJ01	Juveniles	1.55701	0.332959		Adults	1.51327	0.496328		CD02	tdTomato	1.62775	0.386846		tdTomato	1.67053	0.43002
RJ01	Juveniles	1.55925	0.331646		Adults	1.51558	0.495184		CD02	tdTomato	1.63061	0.38673		tdTomato	1.67294	0.42847
RJ01	Juveniles	1.56149	0.330335		Adults	1.51788	0.494035		CD02	tdTomato	1.63346	0.386614		tdTomato	1.67535	0.426911
RJ01	Juveniles	1.56373	0.329023		Adults	1.52018	0.492878		CD02	tdTomato	1.63632	0.386498		tdTomato	1.67776	0.425346
RJ01	Juveniles	1.56597	0.327713		Adults	1.52248	0.491715		CD02	tdTomato	1.63918	0.386382		tdTomato	1.68017	0.423773
RJ01	Juveniles	1.56821	0.326403		Adults	1.52479	0.490546		CD02	tdTomato	1.64204	0.386267		tdTomato	1.68258	0.422193
RJ01	Juveniles	1.57045	0.325094		Adults	1.52709	0.489369		CD02	tdTomato	1.64489	0.386152		tdTomato	1.68499	0.420607
RJ01	Juveniles	1.57269	0.323787		Adults	1.52939	0.488186		CD02	tdTomato	1.64775	0.386037		tdTomato	1.68739	0.419015
RJ01	Juveniles	1.57493	0.32248		Adults	1.53169	0.486996		CD02	tdTomato	1.65061	0.385922		tdTomato	1.6898	0.417416
RJ01	Juveniles	1.57718	0.321175		Adults	1.534	0.485798		CD02	tdTomato	1.65347	0.385807		tdTomato	1.69221	0.415812
RJ01	Juveniles	1.57942	0.319871		Adults	1.5363	0.484593		CD02	tdTomato	1.65632	0.385692		tdTomato	1.69462	0.414202
RJ01	Juveniles	1.58166	0.318568		Adults	1.5386	0.483381		CD02	tdTomato	1.65918	0.385576		tdTomato	1.69703	0.412587
RJ01	Juveniles	1.5839	0.317268		Adults	1.5409	0.482161		CD02	tdTomato	1.66204	0.385461		tdTomato	1.69944	0.410967
RJ01	Juveniles	1.58614	0.315968		Adults	1.5432	0.480933		CD02	tdTomato	1.6649	0.385345		tdTomato	1.70185	0.409342
RJ01	Juveniles	1.58838	0.314671		Adults	1.54551	0.479698		CD02	tdTomato	1.66775	0.385229		tdTomato	1.70426	0.407713
RJ01	Juveniles	1.59062	0.313376		Adults	1.54781	0.478455		CD02	tdTomato	1.67061	0.385113		tdTomato	1.70667	0.406079
RJ01	Juveniles	1.59286	0.312082		Adults	1.55011	0.477203		CD02	tdTomato	1.67347	0.384996		tdTomato	1.70908	0.404442
RJ01	Juveniles	1.5951	0.310791		Adults	1.55241	0.475944		CD02	tdTomato	1.67633	0.384878		tdTomato	1.71149	0.4028
RJ01	Juveniles	1.59735	0.309502		Adults	1.55472	0.474676		CD02	tdTomato	1.67918	0.384761		tdTomato	1.7139	0.401155
RJ01	Juveniles	1.59959	0.308215		Adults	1.55702	0.4734		CD02	tdTomato	1.68204	0.384642		tdTomato	1.71631	0.399507
RJ01	Juveniles	1.60183	0.30693		Adults	1.55932	0.472116		CD02	tdTomato	1.6849	0.384523		tdTomato	1.71872	0.397856
RJ01	Juveniles	1.60407	0.305648		Adults	1.56162	0.470822		CD02	tdTomato	1.68776	0.384403		tdTomato	1.72112	0.396202
RJ01	Juveniles	1.60631	0.304369		Adults	1.56393	0.46952		CD02	tdTomato	1.69061	0.384283		tdTomato	1.72353	0.394546
RJ01	Juveniles	1.60855	0.303092		Adults	1.56623	0.46821		CD02	tdTomato	1.69347	0.384161		tdTomato	1.72594	0.392888
RJ01	Juveniles	1.61079	0.301818		Adults	1.56853	0.46689		CD02	tdTomato	1.69633	0.384039		tdTomato	1.72835	0.391227
RJ01	Juveniles	1.61303	0.300547		Adults	1.57083	0.465561		CD02	tdTomato	1.69919	0.383916		tdTomato	1.73076	0.389565
RJ01	Juveniles	1.61527	0.299279		Adults	1.57313	0.464223		CD02	tdTomato	1.70204	0.383792		tdTomato	1.73317	0.387901
RJ01	Juveniles	1.61752	0.298014		Adults	1.57544	0.462876		CD02	tdTomato	1.7049	0.383667		tdTomato	1.73558	0.386235
RJ01	Juveniles	1.61976	0.296752		Adults	1.57774	0.461519		CD02	tdTomato	1.70776	0.383541		tdTomato	1.73799	0.384569
RJ01	Juveniles	1.622	0.295494		Adults	1.58004	0.460152		CD02	tdTomato	1.71062	0.383413		tdTomato	1.7404	0.382902
RJ01	Juveniles	1.62424	0.294239		Adults	1.58234	0.458776		CD02	tdTomato	1.71347	0.383285		tdTomato	1.74281	0.381234
RJ01	Juveniles	1.62648	0.292987		Adults	1.58465	0.45739		CD02	tdTomato	1.71633	0.383155		tdTomato	1.74522	0.379565
RJ01	Juveniles	1.62872	0.291738		Adults	1.58695	0.455995		CD02	tdTomato	1.71919	0.383023		tdTomato	1.74763	0.377897
RJ01	Juveniles	1.63096	0.290494		Adults	1.58925	0.454589		CD02	tdTomato	1.72205	0.382891		tdTomato	1.75004	0.376228
RJ01	Juveniles	1.6332	0.289252		Adults	1.59155	0.453173		CD02	tdTomato	1.7249	0.382757		tdTomato	1.75244	0.374559
RJ01	Juveniles	1.63544	0.288015		Adults	1.59386	0.451747		CD02	tdTomato	1.72776	0.382621		tdTomato	1.75485	0.372891
RJ01	Juveniles	1.63768	0.286781		Adults	1.59616	0.450311		CD02	tdTomato	1.73062	0.382484		tdTomato	1.75726	0.371224
RJ01	Juveniles	1.63993	0.285552		Adults	1.59846	0.448865		CD02	tdTomato	1.73348	0.382345		tdTomato	1.75967	0.369557
RJ01	Juveniles	1.64217	0.284326		Adults	1.60076	0.447408		CD02	tdTomato	1.73634	0.382204		tdTomato	1.76208	0.367891
RJ01	Juveniles	1.64441	0.283105		Adults	1.60306	0.44594		CD02	tdTomato	1.73919	0.382062		tdTomato	1.76449	0.366226
RJ01	Juveniles	1.64665	0.281887		Adults	1.60537	0.444462		CD02	tdTomato	1.74205	0.381918		tdTomato	1.7669	0.364562
RJ01	Juveniles	1.64889	0.280674		Adults	1.60767	0.442973		CD02	tdTomato	1.74491	0.381772		tdTomato	1.76931	0.3629
RJ01	Juveniles	1.65113	0.279465		Adults	1.60997	0.441473		CD02	tdTomato	1.74777	0.381624		tdTomato	1.77172	0.36124
RJ01	Juveniles	1.65337	0.27826		Adults	1.61227	0.439963		CD02	tdTomato	1.75062	0.381474		tdTomato	1.77413	0.359582
RJ01	Juveniles	1.65561	0.27706		Adults	1.61458	0.438441		CD02	tdTomato	1.75348	0.381323		tdTomato	1.77654	0.357925
RJ01	Juveniles	1.65785	0.275864		Adults	1.61688	0.436909		CD02	tdTomato	1.75634	0.381169		tdTomato	1.77895	0.356271
RJ01	Juveniles	1.6601	0.274673		Adults	1.61918	0.435365		CD02	tdTomato	1.7592	0.381012		tdTomato	1.78136	0.354619
RJ01	Juveniles	1.66234	0.273487		Adults	1.62148	0.433811		CD02	tdTomato	1.76205	0.380854		tdTomato	1.78377	0.352969
RJ01	Juveniles	1.66458	0.272305		Adults	1.62379	0.432245		CD02	tdTomato	1.76491	0.380693		tdTomato	1.78617	0.351322
RJ01	Juveniles	1.66682	0.271128		Adults	1.62609	0.430668		CD02	tdTomato	1.76777	0.38053		tdTomato	1.78858	0.349678
RJ01	Juveniles	1.66906	0.269956		Adults	1.62839	0.42908		CD02	tdTomato	1.77063	0.380365		tdTomato	1.79099	0.348036
RJ01	Juveniles	1.6713	0.268789		Adults	1.63069	0.42748		CD02	tdTomato	1.77348	0.380197		tdTomato	1.7934	0.346398
RJ01	Juveniles	1.67354	0.267626		Adults	1.63299	0.425869		CD02	tdTomato	1.77634	0.380027		tdTomato	1.79581	0.344763
RJ01	Juveniles	1.67578	0.266469		Adults	1.6353	0.424247		CD02	tdTomato	1.7792	0.379854		tdTomato	1.79822	0.34313
RJ01	Juveniles	1.67802	0.265317		Adults	1.6376	0.422613		CD02	tdTomato	1.78206	0.379678		tdTomato	1.80063	0.341502
RJ01	Juveniles	1.68026	0.26417		Adults	1.6399	0.420968		CD02	tdTomato	1.78491	0.3795		tdTomato	1.80304	0.339877
RJ01	Juveniles	1.68251	0.263028		Adults	1.6422	0.419312		CD02	tdTomato	1.78777	0.379319		tdTomato	1.80545	0.338255
RJ01	Juveniles	1.68475	0.261891		Adults	1.64451	0.417644		CD02	tdTomato	1.79063	0.379135		tdTomato	1.80786	0.336637
RJ01	Juveniles	1.68699	0.26076		Adults	1.64681	0.415965		CD02	tdTomato	1.79349	0.378948		tdTomato	1.81027	0.335023
RJ01	Juveniles	1.68923	0.259633		Adults	1.64911	0.414275		CD02	tdTomato	1.79634	0.378758		tdTomato	1.81268	0.333413
RJ01	Juveniles	1.69147	0.258513		Adults	1.65141	0.412574		CD02	tdTomato	1.7992	0.378566		tdTomato	1.81509	0.331806
RJ01	Juveniles	1.69371	0.257397		Adults	1.65372	0.410861		CD02	tdTomato	1.80206	0.37837		tdTomato	1.81749	0.330204
RJ01	Juveniles	1.69595	0.256288		Adults	1.65602	0.409137		CD02	tdTomato	1.80492	0.378171		tdTomato	1.8199	0.328606
RJ01	Juveniles	1.69819	0.255183		Adults	1.65832	0.407401		CD02	tdTomato	1.80777	0.37797		tdTomato	1.82231	0.327012
RJ01	Juveniles	1.70043	0.254085		Adults	1.66062	0.405655		CD02	tdTomato	1.81063	0.377765		tdTomato	1.82472	0.325423
RJ01	Juveniles	1.70268	0.252991		Adults	1.66292	0.403898		CD02	tdTomato	1.81349	0.377556		tdTomato	1.82713	0.323837
RJ01	Juveniles	1.70492	0.251904		Adults	1.66523	0.40213		CD02	tdTomato	1.81635	0.377345		tdTomato	1.82954	0.322257
RJ01	Juveniles	1.70716	0.250822		Adults	1.66753	0.40035		CD02	tdTomato	1.8192	0.37713		tdTomato	1.83195	0.32068
RJ01	Juveniles	1.7094	0.249746		Adults	1.66983	0.398561		CD02	tdTomato	1.82206	0.376911		tdTomato	1.83436	0.319108
RJ01	Juveniles	1.71164	0.248676		Adults	1.67213	0.39676		CD02	tdTomato	1.82492	0.376689		tdTomato	1.83677	0.317541
RJ01	Juveniles	1.71388	0.247611		Adults	1.67444	0.394949		CD02	tdTomato	1.82778	0.376464		tdTomato	1.83918	0.315979
RJ01	Juveniles	1.71612	0.246552		Adults	1.67674	0.393128		CD02	tdTomato	1.83063	0.376235		tdTomato	1.84159	0.314421
RJ01	Juveniles	1.71836	0.245499		Adults	1.67904	0.391296		CD02	tdTomato	1.83349	0.376002		tdTomato	1.844	0.312868
RJ01	Juveniles	1.7206	0.244452		Adults	1.68134	0.389454		CD02	tdTomato	1.83635	0.375766		tdTomato	1.84641	0.31132
RJ01	Juveniles	1.72285	0.243411		Adults	1.68365	0.387602		CD02	tdTomato	1.83921	0.375526		tdTomato	1.84882	0.309776
RJ01	Juveniles	1.72509	0.242376		Adults	1.68595	0.385741		CD02	tdTomato	1.84206	0.375282		tdTomato	1.85122	0.308237
RJ01	Juveniles	1.72733	0.241347		Adults	1.68825	0.38387		CD02	tdTomato	1.84492	0.375034		tdTomato	1.85363	0.306704
RJ01	Juveniles	1.72957	0.240324		Adults	1.69055	0.381989		CD02	tdTomato	1.84778	0.374782		tdTomato	1.85604	0.305175
RJ01	Juveniles	1.73181	0.239307		Adults	1.69285	0.380099		CD02	tdTomato	1.85064	0.374527		tdTomato	1.85845	0.303651
RJ01	Juveniles	1.73405	0.238295		Adults	1.69516	0.3782		CD02	tdTomato	1.85349	0.374267		tdTomato	1.86086	0.302132
RJ01	Juveniles	1.73629	0.23729		Adults	1.69746	0.376292		CD02	tdTomato	1.85635	0.374004		tdTomato	1.86327	0.300617
RJ01	Juveniles	1.73853	0.236291		Adults	1.69976	0.374376		CD02	tdTomato	1.85921	0.373736		tdTomato	1.86568	0.299108
RJ01	Juveniles	1.74077	0.235298		Adults	1.70206	0.372451		CD02	tdTomato	1.86207	0.373464		tdTomato	1.86809	0.297604
RJ01	Juveniles	1.74301	0.234311		Adults	1.70437	0.370518		CD02	tdTomato	1.86492	0.373188		tdTomato	1.8705	0.296105
RJ01	Juveniles	1.74526	0.233331		Adults	1.70667	0.368577		CD02	tdTomato	1.86778	0.372908		tdTomato	1.87291	0.294611
RJ01	Juveniles	1.7475	0.232356		Adults	1.70897	0.366629		CD02	tdTomato	1.87064	0.372623		tdTomato	1.87532	0.293121
RJ01	Juveniles	1.74974	0.231387		Adults	1.71127	0.364673		CD02	tdTomato	1.8735	0.372334		tdTomato	1.87773	0.291637
RJ01	Juveniles	1.75198	0.230425		Adults	1.71358	0.36271		CD02	tdTomato	1.87635	0.37204		tdTomato	1.88014	0.290158
RJ01	Juveniles	1.75422	0.229469		Adults	1.71588	0.36074		CD02	tdTomato	1.87921	0.371743		tdTomato	1.88254	0.288684
RJ01	Juveniles	1.75646	0.228519		Adults	1.71818	0.358764		CD02	tdTomato	1.88207	0.37144		tdTomato	1.88495	0.287215
RJ01	Juveniles	1.7587	0.227575		Adults	1.72048	0.356782		CD02	tdTomato	1.88493	0.371133		tdTomato	1.88736	0.28575
RJ01	Juveniles	1.76094	0.226637		Adults	1.72279	0.354794		CD02	tdTomato	1.88778	0.370822		tdTomato	1.88977	0.284291
RJ01	Juveniles	1.76318	0.225705		Adults	1.72509	0.3528		CD02	tdTomato	1.89064	0.370506		tdTomato	1.89218	0.282837
RJ01	Juveniles	1.76543	0.22478		Adults	1.72739	0.350801		CD02	tdTomato	1.8935	0.370185		tdTomato	1.89459	0.281388
RJ01	Juveniles	1.76767	0.22386		Adults	1.72969	0.348797		CD02	tdTomato	1.89636	0.36986		tdTomato	1.897	0.279943
RJ01	Juveniles	1.76991	0.222947		Adults	1.73199	0.346789		CD02	tdTomato	1.89921	0.369529		tdTomato	1.89941	0.278504
RJ01	Juveniles	1.77215	0.22204		Adults	1.7343	0.344777		CD02	tdTomato	1.90207	0.369194		tdTomato	1.90182	0.27707
RJ01	Juveniles	1.77439	0.221139		Adults	1.7366	0.34276		CD02	tdTomato	1.90493	0.368855		tdTomato	1.90423	0.27564
RJ01	Juveniles	1.77663	0.220245		Adults	1.7389	0.340741		CD02	tdTomato	1.90779	0.36851		tdTomato	1.90664	0.274216
RJ01	Juveniles	1.77887	0.219356		Adults	1.7412	0.338718		CD02	tdTomato	1.91064	0.36816		tdTomato	1.90905	0.272796
RJ01	Juveniles	1.78111	0.218474		Adults	1.74351	0.336692		CD02	tdTomato	1.9135	0.367806		tdTomato	1.91146	0.271382
RJ01	Juveniles	1.78335	0.217597		Adults	1.74581	0.334664		CD02	tdTomato	1.91636	0.367446		tdTomato	1.91387	0.269972
RJ01	Juveniles	1.78559	0.216727		Adults	1.74811	0.332635		CD02	tdTomato	1.91922	0.367081		tdTomato	1.91627	0.268567
RJ01	Juveniles	1.78784	0.215863		Adults	1.75041	0.330603		CD02	tdTomato	1.92207	0.366711		tdTomato	1.91868	0.267167
RJ01	Juveniles	1.79008	0.215005		Adults	1.75272	0.328571		CD02	tdTomato	1.92493	0.366336		tdTomato	1.92109	0.265772
RJ01	Juveniles	1.79232	0.214153		Adults	1.75502	0.326538		CD02	tdTomato	1.92779	0.365956		tdTomato	1.9235	0.264382
RJ01	Juveniles	1.79456	0.213307		Adults	1.75732	0.324504		CD02	tdTomato	1.93065	0.365571		tdTomato	1.92591	0.262996
RJ01	Juveniles	1.7968	0.212467		Adults	1.75962	0.322471		CD02	tdTomato	1.9335	0.36518		tdTomato	1.92832	0.261616
RJ01	Juveniles	1.79904	0.211633		Adults	1.76192	0.320438		CD02	tdTomato	1.93636	0.364784		tdTomato	1.93073	0.26024
RJ01	Juveniles	1.80128	0.210805		Adults	1.76423	0.318406		CD02	tdTomato	1.93922	0.364383		tdTomato	1.93314	0.258869
RJ01	Juveniles	1.80352	0.209983		Adults	1.76653	0.316375		CD02	tdTomato	1.94208	0.363977		tdTomato	1.93555	0.257503
RJ01	Juveniles	1.80576	0.209166		Adults	1.76883	0.314346		CD02	tdTomato	1.94493	0.363565		tdTomato	1.93796	0.256142
RJ01	Juveniles	1.80801	0.208356		Adults	1.77113	0.312319		CD02	tdTomato	1.94779	0.363148		tdTomato	1.94037	0.254785
RJ01	Juveniles	1.81025	0.207552		Adults	1.77344	0.310295		CD02	tdTomato	1.95065	0.362725		tdTomato	1.94278	0.253433
RJ01	Juveniles	1.81249	0.206753		Adults	1.77574	0.308273		CD02	tdTomato	1.95351	0.362296		tdTomato	1.94519	0.252086
RJ01	Juveniles	1.81473	0.20596		Adults	1.77804	0.306255		CD02	tdTomato	1.95636	0.361863		tdTomato	1.94759	0.250744
RJ01	Juveniles	1.81697	0.205173		Adults	1.78034	0.304241		CD02	tdTomato	1.95922	0.361423		tdTomato	1.95	0.249407
RJ01	Juveniles	1.81921	0.204392		Adults	1.78265	0.302232		CD02	tdTomato	1.96208	0.360978		tdTomato	1.95241	0.248074
RJ01	Juveniles	1.82145	0.203616		Adults	1.78495	0.300226		CD02	tdTomato	1.96494	0.360528		tdTomato	1.95482	0.246746
RJ01	Juveniles	1.82369	0.202847		Adults	1.78725	0.298226		CD02	tdTomato	1.9678	0.360071		tdTomato	1.95723	0.245423
RJ01	Juveniles	1.82593	0.202082		Adults	1.78955	0.296232		CD02	tdTomato	1.97065	0.359609		tdTomato	1.95964	0.244105
RJ01	Juveniles	1.82818	0.201324		Adults	1.79185	0.294243		CD02	tdTomato	1.97351	0.359142		tdTomato	1.96205	0.242791
RJ01	Juveniles	1.83042	0.200571		Adults	1.79416	0.292261		CD02	tdTomato	1.97637	0.358668		tdTomato	1.96446	0.241482
RJ01	Juveniles	1.83266	0.199823		Adults	1.79646	0.290285		CD02	tdTomato	1.97923	0.358189		tdTomato	1.96687	0.240178
RJ01	Juveniles	1.8349	0.199081		Adults	1.79876	0.288317		CD02	tdTomato	1.98208	0.357704		tdTomato	1.96928	0.238879
RJ01	Juveniles	1.83714	0.198345		Adults	1.80106	0.286356		CD02	tdTomato	1.98494	0.357214		tdTomato	1.97169	0.237585
RJ01	Juveniles	1.83938	0.197614		Adults	1.80337	0.284402		CD02	tdTomato	1.9878	0.356717		tdTomato	1.9741	0.236295
RJ01	Juveniles	1.84162	0.196888		Adults	1.80567	0.282457		CD02	tdTomato	1.99066	0.356214		tdTomato	1.97651	0.235011
RJ01	Juveniles	1.84386	0.196167		Adults	1.80797	0.280521		CD02	tdTomato	1.99351	0.355706		tdTomato	1.97892	0.233731
RJ01	Juveniles	1.8461	0.195452		Adults	1.81027	0.278594		CD02	tdTomato	1.99637	0.355192		tdTomato	1.98132	0.232456
RJ01	Juveniles	1.84834	0.194742		Adults	1.81258	0.276676		CD02	tdTomato	1.99923	0.354671		tdTomato	1.98373	0.231186
RJ01	Juveniles	1.85059	0.194037		Adults	1.81488	0.274768		CD02	tdTomato	2.00209	0.354145		tdTomato	1.98614	0.229921
RJ01	Juveniles	1.85283	0.193338		Adults	1.81718	0.27287		CD02	tdTomato	2.00494	0.353613		tdTomato	1.98855	0.22866
RJ01	Juveniles	1.85507	0.192643		Adults	1.81948	0.270982		CD02	tdTomato	2.0078	0.353075		tdTomato	1.99096	0.227405
RJ01	Juveniles	1.85731	0.191954		Adults	1.82178	0.269105		CD02	tdTomato	2.01066	0.35253		tdTomato	1.99337	0.226154
RJ01	Juveniles	1.85955	0.191269		Adults	1.82409	0.267239		CD02	tdTomato	2.01352	0.35198		tdTomato	1.99578	0.224909
RJ01	Juveniles	1.86179	0.190589		Adults	1.82639	0.265385		CD02	tdTomato	2.01637	0.351424		tdTomato	1.99819	0.223669
RJ01	Juveniles	1.86403	0.189915		Adults	1.82869	0.263542		CD02	tdTomato	2.01923	0.350861		tdTomato	2.0006	0.222433
RJ01	Juveniles	1.86627	0.189245		Adults	1.83099	0.261712		CD02	tdTomato	2.02209	0.350293		tdTomato	2.00301	0.221203
RJ01	Juveniles	1.86851	0.18858		Adults	1.8333	0.259893		CD02	tdTomato	2.02495	0.349718		tdTomato	2.00542	0.219978
RJ01	Juveniles	1.87076	0.187919		Adults	1.8356	0.258088		CD02	tdTomato	2.0278	0.349137		tdTomato	2.00783	0.218757
RJ01	Juveniles	1.873	0.187263		Adults	1.8379	0.256295		CD02	tdTomato	2.03066	0.34855		tdTomato	2.01024	0.217542
RJ01	Juveniles	1.87524	0.186612		Adults	1.8402	0.254515		CD02	tdTomato	2.03352	0.347957		tdTomato	2.01264	0.216332
RJ01	Juveniles	1.87748	0.185966		Adults	1.84251	0.252749		CD02	tdTomato	2.03638	0.347357		tdTomato	2.01505	0.215128
RJ01	Juveniles	1.87972	0.185324		Adults	1.84481	0.250996		CD02	tdTomato	2.03923	0.346752		tdTomato	2.01746	0.213928
RJ01	Juveniles	1.88196	0.184686		Adults	1.84711	0.249257		CD02	tdTomato	2.04209	0.34614		tdTomato	2.01987	0.212734
RJ01	Juveniles	1.8842	0.184053		Adults	1.84941	0.247532		CD02	tdTomato	2.04495	0.345522		tdTomato	2.02228	0.211545
RJ01	Juveniles	1.88644	0.183424		Adults	1.85171	0.245821		CD02	tdTomato	2.04781	0.344897		tdTomato	2.02469	0.210362
RJ01	Juveniles	1.88868	0.182799		Adults	1.85402	0.244125		CD02	tdTomato	2.05066	0.344267		tdTomato	2.0271	0.209183
RJ01	Juveniles	1.89093	0.182178		Adults	1.85632	0.242443		CD02	tdTomato	2.05352	0.34363		tdTomato	2.02951	0.208011
RJ01	Juveniles	1.89317	0.181562		Adults	1.85862	0.240776		CD02	tdTomato	2.05638	0.342987		tdTomato	2.03192	0.206843
RJ01	Juveniles	1.89541	0.18095		Adults	1.86092	0.239125		CD02	tdTomato	2.05924	0.342337		tdTomato	2.03433	0.205681
RJ01	Juveniles	1.89765	0.180341		Adults	1.86323	0.237488		CD02	tdTomato	2.06209	0.341682		tdTomato	2.03674	0.204525
RJ01	Juveniles	1.89989	0.179737		Adults	1.86553	0.235866		CD02	tdTomato	2.06495	0.34102		tdTomato	2.03915	0.203374
RJ01	Juveniles	1.90213	0.179136		Adults	1.86783	0.23426		CD02	tdTomato	2.06781	0.340351		tdTomato	2.04156	0.202228
RJ01	Juveniles	1.90437	0.17854		Adults	1.87013	0.23267		CD02	tdTomato	2.07067	0.339677		tdTomato	2.04397	0.201089
RJ01	Juveniles	1.90661	0.177947		Adults	1.87244	0.231095		CD02	tdTomato	2.07352	0.338996		tdTomato	2.04637	0.199955
RJ01	Juveniles	1.90885	0.177357		Adults	1.87474	0.229535		CD02	tdTomato	2.07638	0.338309		tdTomato	2.04878	0.198826
RJ01	Juveniles	1.91109	0.176772		Adults	1.87704	0.227992		CD02	tdTomato	2.07924	0.337615		tdTomato	2.05119	0.197703
RJ01	Juveniles	1.91334	0.176189		Adults	1.87934	0.226464		CD02	tdTomato	2.0821	0.336915		tdTomato	2.0536	0.196586
RJ01	Juveniles	1.91558	0.175611		Adults	1.88164	0.224952		CD02	tdTomato	2.08495	0.336209		tdTomato	2.05601	0.195475
RJ01	Juveniles	1.91782	0.175036		Adults	1.88395	0.223456		CD02	tdTomato	2.08781	0.335496		tdTomato	2.05842	0.194369
RJ01	Juveniles	1.92006	0.174464		Adults	1.88625	0.221976		CD02	tdTomato	2.09067	0.334777		tdTomato	2.06083	0.19327
RJ01	Juveniles	1.9223	0.173895		Adults	1.88855	0.220512		CD02	tdTomato	2.09353	0.334052		tdTomato	2.06324	0.192176
RJ01	Juveniles	1.92454	0.17333		Adults	1.89085	0.219064		CD02	tdTomato	2.09638	0.33332		tdTomato	2.06565	0.191088
RJ01	Juveniles	1.92678	0.172767		Adults	1.89316	0.217631		CD02	tdTomato	2.09924	0.332582		tdTomato	2.06806	0.190006
RJ01	Juveniles	1.92902	0.172208		Adults	1.89546	0.216215		CD02	tdTomato	2.1021	0.331838		tdTomato	2.07047	0.18893
RJ01	Juveniles	1.93126	0.171652		Adults	1.89776	0.214815		CD02	tdTomato	2.10496	0.331087		tdTomato	2.07288	0.187859
RJ01	Juveniles	1.93351	0.171099		Adults	1.90006	0.213431		CD02	tdTomato	2.10781	0.330331		tdTomato	2.07529	0.186795
RJ01	Juveniles	1.93575	0.170549		Adults	1.90237	0.212062		CD02	tdTomato	2.11067	0.329567		tdTomato	2.07769	0.185737
RJ01	Juveniles	1.93799	0.170001		Adults	1.90467	0.210709		CD02	tdTomato	2.11353	0.328798		tdTomato	2.0801	0.184685
RJ01	Juveniles	1.94023	0.169456		Adults	1.90697	0.209372		CD02	tdTomato	2.11639	0.328022		tdTomato	2.08251	0.183639
RJ01	Juveniles	1.94247	0.168914		Adults	1.90927	0.208051		CD02	tdTomato	2.11924	0.32724		tdTomato	2.08492	0.182598
RJ01	Juveniles	1.94471	0.168375		Adults	1.91157	0.206745		CD02	tdTomato	2.1221	0.326451		tdTomato	2.08733	0.181564
RJ01	Juveniles	1.94695	0.167838		Adults	1.91388	0.205455		CD02	tdTomato	2.12496	0.325656		tdTomato	2.08974	0.180536
RJ01	Juveniles	1.94919	0.167303		Adults	1.91618	0.20418		CD02	tdTomato	2.12782	0.324855		tdTomato	2.09215	0.179514
RJ01	Juveniles	1.95143	0.166771		Adults	1.91848	0.20292		CD02	tdTomato	2.13067	0.324048		tdTomato	2.09456	0.178498
RJ01	Juveniles	1.95367	0.166241		Adults	1.92078	0.201675		CD02	tdTomato	2.13353	0.323235		tdTomato	2.09697	0.177489
RJ01	Juveniles	1.95592	0.165714		Adults	1.92309	0.200445		CD02	tdTomato	2.13639	0.322415		tdTomato	2.09938	0.176485
RJ01	Juveniles	1.95816	0.165188		Adults	1.92539	0.19923		CD02	tdTomato	2.13925	0.321589		tdTomato	2.10179	0.175487
RJ01	Juveniles	1.9604	0.164665		Adults	1.92769	0.19803		CD02	tdTomato	2.1421	0.320756		tdTomato	2.1042	0.174496
RJ01	Juveniles	1.96264	0.164144		Adults	1.92999	0.196845		CD02	tdTomato	2.14496	0.319918		tdTomato	2.10661	0.17351
RJ01	Juveniles	1.96488	0.163625		Adults	1.9323	0.195673		CD02	tdTomato	2.14782	0.319073		tdTomato	2.10902	0.172531
RJ01	Juveniles	1.96712	0.163107		Adults	1.9346	0.194516		CD02	tdTomato	2.15068	0.318222		tdTomato	2.11142	0.171558
RJ01	Juveniles	1.96936	0.162592		Adults	1.9369	0.193373		CD02	tdTomato	2.15353	0.317366		tdTomato	2.11383	0.170591
RJ01	Juveniles	1.9716	0.162078		Adults	1.9392	0.192244		CD02	tdTomato	2.15639	0.316502		tdTomato	2.11624	0.169629
RJ01	Juveniles	1.97384	0.161566		Adults	1.9415	0.191128		CD02	tdTomato	2.15925	0.315633		tdTomato	2.11865	0.168674
RJ01	Juveniles	1.97609	0.161056		Adults	1.94381	0.190026		CD02	tdTomato	2.16211	0.314758		tdTomato	2.12106	0.167725
RJ01	Juveniles	1.97833	0.160547		Adults	1.94611	0.188937		CD02	tdTomato	2.16496	0.313876		tdTomato	2.12347	0.166782
RJ01	Juveniles	1.98057	0.16004		Adults	1.94841	0.187861		CD02	tdTomato	2.16782	0.312989		tdTomato	2.12588	0.165845
RJ01	Juveniles	1.98281	0.159534		Adults	1.95071	0.186798		CD02	tdTomato	2.17068	0.312095		tdTomato	2.12829	0.164913
RJ01	Juveniles	1.98505	0.15903		Adults	1.95302	0.185747		CD02	tdTomato	2.17354	0.311196		tdTomato	2.1307	0.163988
RJ01	Juveniles	1.98729	0.158527		Adults	1.95532	0.184709		CD02	tdTomato	2.17639	0.31029		tdTomato	2.13311	0.163068
RJ01	Juveniles	1.98953	0.158025		Adults	1.95762	0.183683		CD02	tdTomato	2.17925	0.309379		tdTomato	2.13552	0.162155
RJ01	Juveniles	1.99177	0.157524		Adults	1.95992	0.182669		CD02	tdTomato	2.18211	0.308461		tdTomato	2.13793	0.161247
RJ01	Juveniles	1.99401	0.157024		Adults	1.96223	0.181667		CD02	tdTomato	2.18497	0.307538		tdTomato	2.14034	0.160345
RJ01	Juveniles	1.99626	0.156526		Adults	1.96453	0.180676		CD02	tdTomato	2.18783	0.306608		tdTomato	2.14274	0.159448
RJ01	Juveniles	1.9985	0.156028		Adults	1.96683	0.179697		CD02	tdTomato	2.19068	0.305673		tdTomato	2.14515	0.158557
RJ01	Juveniles	2.00074	0.155531		Adults	1.96913	0.178728		CD02	tdTomato	2.19354	0.304732		tdTomato	2.14756	0.157672
RJ01	Juveniles	2.00298	0.155036		Adults	1.97143	0.17777		CD02	tdTomato	2.1964	0.303785		tdTomato	2.14997	0.156792
RJ01	Juveniles	2.00522	0.154541		Adults	1.97374	0.176823		CD02	tdTomato	2.19926	0.302832		tdTomato	2.15238	0.155918
RJ01	Juveniles	2.00746	0.154046		Adults	1.97604	0.175886		CD02	tdTomato	2.20211	0.301874		tdTomato	2.15479	0.155049
RJ01	Juveniles	2.0097	0.153553		Adults	1.97834	0.174959		CD02	tdTomato	2.20497	0.30091		tdTomato	2.1572	0.154186
RJ01	Juveniles	2.01194	0.15306		Adults	1.98064	0.174042		CD02	tdTomato	2.20783	0.29994		tdTomato	2.15961	0.153328
RJ01	Juveniles	2.01418	0.152567		Adults	1.98295	0.173134		CD02	tdTomato	2.21069	0.298965		tdTomato	2.16202	0.152475
RJ01	Juveniles	2.01642	0.152075		Adults	1.98525	0.172236		CD02	tdTomato	2.21354	0.297984		tdTomato	2.16443	0.151627
RJ01	Juveniles	2.01867	0.151584		Adults	1.98755	0.171346		CD02	tdTomato	2.2164	0.296997		tdTomato	2.16684	0.150784
RJ01	Juveniles	2.02091	0.151093		Adults	1.98985	0.170466		CD02	tdTomato	2.21926	0.296005		tdTomato	2.16925	0.149946
RJ01	Juveniles	2.02315	0.150602		Adults	1.99216	0.169594		CD02	tdTomato	2.22212	0.295007		tdTomato	2.17166	0.149113
RJ01	Juveniles	2.02539	0.150111		Adults	1.99446	0.16873		CD02	tdTomato	2.22497	0.294003		tdTomato	2.17407	0.148286
RJ01	Juveniles	2.02763	0.149621		Adults	1.99676	0.167875		CD02	tdTomato	2.22783	0.292995		tdTomato	2.17647	0.147462
RJ01	Juveniles	2.02987	0.14913		Adults	1.99906	0.167027		CD02	tdTomato	2.23069	0.291981		tdTomato	2.17888	0.146644
RJ01	Juveniles	2.03211	0.14864		Adults	2.00136	0.166187		CD02	tdTomato	2.23355	0.290961		tdTomato	2.18129	0.14583
RJ01	Juveniles	2.03435	0.14815		Adults	2.00367	0.165355		CD02	tdTomato	2.2364	0.289936		tdTomato	2.1837	0.14502
RJ01	Juveniles	2.03659	0.14766		Adults	2.00597	0.164529		CD02	tdTomato	2.23926	0.288906		tdTomato	2.18611	0.144215
RJ01	Juveniles	2.03884	0.14717		Adults	2.00827	0.163711		CD02	tdTomato	2.24212	0.287871		tdTomato	2.18852	0.143415
RJ01	Juveniles	2.04108	0.146679		Adults	2.01057	0.162899		CD02	tdTomato	2.24498	0.28683		tdTomato	2.19093	0.142618
RJ01	Juveniles	2.04332	0.146189		Adults	2.01288	0.162094		CD02	tdTomato	2.24783	0.285784		tdTomato	2.19334	0.141826
RJ01	Juveniles	2.04556	0.145698		Adults	2.01518	0.161295		CD02	tdTomato	2.25069	0.284733		tdTomato	2.19575	0.141038
RJ01	Juveniles	2.0478	0.145207		Adults	2.01748	0.160502		CD02	tdTomato	2.25355	0.283677		tdTomato	2.19816	0.140253
RJ01	Juveniles	2.05004	0.144716		Adults	2.01978	0.159715		CD02	tdTomato	2.25641	0.282616		tdTomato	2.20057	0.139473
RJ01	Juveniles	2.05228	0.144224		Adults	2.02209	0.158934		CD02	tdTomato	2.25926	0.28155		tdTomato	2.20298	0.138696
RJ01	Juveniles	2.05452	0.143732		Adults	2.02439	0.158158		CD02	tdTomato	2.26212	0.280479		tdTomato	2.20539	0.137922
RJ01	Juveniles	2.05676	0.143239		Adults	2.02669	0.157388		CD02	tdTomato	2.26498	0.279404		tdTomato	2.20779	0.137153
RJ01	Juveniles	2.05901	0.142746		Adults	2.02899	0.156622		CD02	tdTomato	2.26784	0.278323		tdTomato	2.2102	0.136386
RJ01	Juveniles	2.06125	0.142253		Adults	2.03129	0.155862		CD02	tdTomato	2.27069	0.277237		tdTomato	2.21261	0.135623
RJ01	Juveniles	2.06349	0.141758		Adults	2.0336	0.155106		CD02	tdTomato	2.27355	0.276147		tdTomato	2.21502	0.134863
RJ01	Juveniles	2.06573	0.141264		Adults	2.0359	0.154355		CD02	tdTomato	2.27641	0.275052		tdTomato	2.21743	0.134107
RJ01	Juveniles	2.06797	0.140768		Adults	2.0382	0.153608		CD02	tdTomato	2.27927	0.273953		tdTomato	2.21984	0.133353
RJ01	Juveniles	2.07021	0.140272		Adults	2.0405	0.152865		CD02	tdTomato	2.28212	0.272849		tdTomato	2.22225	0.132602
RJ01	Juveniles	2.07245	0.139775		Adults	2.04281	0.152126		CD02	tdTomato	2.28498	0.27174		tdTomato	2.22466	0.131853
RJ01	Juveniles	2.07469	0.139277		Adults	2.04511	0.151392		CD02	tdTomato	2.28784	0.270627		tdTomato	2.22707	0.131108
RJ01	Juveniles	2.07693	0.138778		Adults	2.04741	0.150661		CD02	tdTomato	2.2907	0.269509		tdTomato	2.22948	0.130365
RJ01	Juveniles	2.07917	0.138278		Adults	2.04971	0.149933		CD02	tdTomato	2.29355	0.268387		tdTomato	2.23189	0.129624
RJ01	Juveniles	2.08142	0.137778		Adults	2.05202	0.149209		CD02	tdTomato	2.29641	0.267261		tdTomato	2.2343	0.128886
RJ01	Juveniles	2.08366	0.137276		Adults	2.05432	0.148489		CD02	tdTomato	2.29927	0.26613		tdTomato	2.23671	0.12815
RJ01	Juveniles	2.0859	0.136774		Adults	2.05662	0.147771		CD02	tdTomato	2.30213	0.264996		tdTomato	2.23911	0.127416
RJ01	Juveniles	2.08814	0.136271		Adults	2.05892	0.147057		CD02	tdTomato	2.30498	0.263857		tdTomato	2.24152	0.126684
RJ01	Juveniles	2.09038	0.135766		Adults	2.06123	0.146345		CD02	tdTomato	2.30784	0.262714		tdTomato	2.24393	0.125953
RJ01	Juveniles	2.09262	0.135261		Adults	2.06353	0.145637		CD02	tdTomato	2.3107	0.261567		tdTomato	2.24634	0.125225
RJ01	Juveniles	2.09486	0.134754		Adults	2.06583	0.144931		CD02	tdTomato	2.31356	0.260416		tdTomato	2.24875	0.124498
RJ01	Juveniles	2.0971	0.134246		Adults	2.06813	0.144227		CD02	tdTomato	2.31641	0.259261		tdTomato	2.25116	0.123773
RJ01	Juveniles	2.09934	0.133737		Adults	2.07043	0.143527		CD02	tdTomato	2.31927	0.258102		tdTomato	2.25357	0.123049
RJ01	Juveniles	2.10159	0.133227		Adults	2.07274	0.142828		CD02	tdTomato	2.32213	0.256939		tdTomato	2.25598	0.122327
RJ01	Juveniles	2.10383	0.132716		Adults	2.07504	0.142133		CD02	tdTomato	2.32499	0.255773		tdTomato	2.25839	0.121606
RJ01	Juveniles	2.10607	0.132203		Adults	2.07734	0.141439		CD02	tdTomato	2.32784	0.254603		tdTomato	2.2608	0.120886
RJ01	Juveniles	2.10831	0.131689		Adults	2.07964	0.140747		CD02	tdTomato	2.3307	0.25343		tdTomato	2.26321	0.120167
RJ01	Juveniles	2.11055	0.131174		Adults	2.08195	0.140058		CD02	tdTomato	2.33356	0.252253		tdTomato	2.26562	0.119449
RJ01	Juveniles	2.11279	0.130658		Adults	2.08425	0.139371		CD02	tdTomato	2.33642	0.251072		tdTomato	2.26803	0.118732
RJ01	Juveniles	2.11503	0.13014		Adults	2.08655	0.138686		CD02	tdTomato	2.33927	0.249888		tdTomato	2.27044	0.118015
RJ01	Juveniles	2.11727	0.129621		Adults	2.08885	0.138002		CD02	tdTomato	2.34213	0.248701		tdTomato	2.27284	0.1173
RJ01	Juveniles	2.11951	0.1291		Adults	2.09116	0.137321		CD02	tdTomato	2.34499	0.24751		tdTomato	2.27525	0.116585
RJ01	Juveniles	2.12175	0.128578		Adults	2.09346	0.136642		CD02	tdTomato	2.34785	0.246316		tdTomato	2.27766	0.11587
RJ01	Juveniles	2.124	0.128055		Adults	2.09576	0.135964		CD02	tdTomato	2.3507	0.245119		tdTomato	2.28007	0.115156
RJ01	Juveniles	2.12624	0.12753		Adults	2.09806	0.135288		CD02	tdTomato	2.35356	0.243919		tdTomato	2.28248	0.114442
RJ01	Juveniles	2.12848	0.127004		Adults	2.10036	0.134614		CD02	tdTomato	2.35642	0.242716		tdTomato	2.28489	0.113728
RJ01	Juveniles	2.13072	0.126476		Adults	2.10267	0.133941		CD02	tdTomato	2.35928	0.24151		tdTomato	2.2873	0.113015
RJ01	Juveniles	2.13296	0.125947		Adults	2.10497	0.133271		CD02	tdTomato	2.36213	0.240302		tdTomato	2.28971	0.112302
RJ01	Juveniles	2.1352	0.125417		Adults	2.10727	0.132601		CD02	tdTomato	2.36499	0.23909		tdTomato	2.29212	0.111589
RJ01	Juveniles	2.13744	0.124885		Adults	2.10957	0.131934		CD02	tdTomato	2.36785	0.237876		tdTomato	2.29453	0.110875
RJ01	Juveniles	2.13968	0.124351		Adults	2.11188	0.131268		CD02	tdTomato	2.37071	0.236659		tdTomato	2.29694	0.110162
RJ01	Juveniles	2.14192	0.123816		Adults	2.11418	0.130604		CD02	tdTomato	2.37356	0.235439		tdTomato	2.29935	0.109449
RJ01	Juveniles	2.14417	0.12328		Adults	2.11648	0.129941		CD02	tdTomato	2.37642	0.234217		tdTomato	2.30176	0.108735
RJ01	Juveniles	2.14641	0.122742		Adults	2.11878	0.12928		CD02	tdTomato	2.37928	0.232993		tdTomato	2.30416	0.108021
RJ01	Juveniles	2.14865	0.122203		Adults	2.12109	0.12862		CD02	tdTomato	2.38214	0.231766		tdTomato	2.30657	0.107307
RJ01	Juveniles	2.15089	0.121662		Adults	2.12339	0.127962		CD02	tdTomato	2.38499	0.230537		tdTomato	2.30898	0.106592
RJ01	Juveniles	2.15313	0.121119		Adults	2.12569	0.127306		CD02	tdTomato	2.38785	0.229305		tdTomato	2.31139	0.105877
RJ01	Juveniles	2.15537	0.120575		Adults	2.12799	0.126651		CD02	tdTomato	2.39071	0.228072		tdTomato	2.3138	0.105162
RJ01	Juveniles	2.15761	0.12003		Adults	2.13029	0.125998		CD02	tdTomato	2.39357	0.226836		tdTomato	2.31621	0.104446
RJ01	Juveniles	2.15985	0.119482		Adults	2.1326	0.125346		CD02	tdTomato	2.39642	0.225599		tdTomato	2.31862	0.10373
RJ01	Juveniles	2.16209	0.118934		Adults	2.1349	0.124696		CD02	tdTomato	2.39928	0.224359		tdTomato	2.32103	0.103013
RJ01	Juveniles	2.16434	0.118384		Adults	2.1372	0.124047		CD02	tdTomato	2.40214	0.223118		tdTomato	2.32344	0.102295
RJ01	Juveniles	2.16658	0.117832		Adults	2.1395	0.1234		CD02	tdTomato	2.405	0.221875		tdTomato	2.32585	0.101577
RJ01	Juveniles	2.16882	0.117279		Adults	2.14181	0.122755		CD02	tdTomato	2.40785	0.22063		tdTomato	2.32826	0.100859
RJ01	Juveniles	2.17106	0.116725		Adults	2.14411	0.122111		CD02	tdTomato	2.41071	0.219384		tdTomato	2.33067	0.100139
RJ01	Juveniles	2.1733	0.116169		Adults	2.14641	0.121469		CD02	tdTomato	2.41357	0.218136		tdTomato	2.33308	0.0994195
RJ01	Juveniles	2.17554	0.115611		Adults	2.14871	0.120828		CD02	tdTomato	2.41643	0.216887		tdTomato	2.33549	0.098699
RJ01	Juveniles	2.17778	0.115052		Adults	2.15102	0.12019		CD02	tdTomato	2.41929	0.215636		tdTomato	2.33789	0.0979778
RJ01	Juveniles	2.18002	0.114491		Adults	2.15332	0.119552		CD02	tdTomato	2.42214	0.214384		tdTomato	2.3403	0.097256
RJ01	Juveniles	2.18226	0.113929		Adults	2.15562	0.118917		CD02	tdTomato	2.425	0.213131		tdTomato	2.34271	0.0965335
RJ01	Juveniles	2.1845	0.113366		Adults	2.15792	0.118283		CD02	tdTomato	2.42786	0.211877		tdTomato	2.34512	0.0958104
RJ01	Juveniles	2.18675	0.112801		Adults	2.16022	0.117651		CD02	tdTomato	2.43072	0.210622		tdTomato	2.34753	0.0950866
RJ01	Juveniles	2.18899	0.112235		Adults	2.16253	0.11702		CD02	tdTomato	2.43357	0.209365		tdTomato	2.34994	0.0943623
RJ01	Juveniles	2.19123	0.111667		Adults	2.16483	0.116391		CD02	tdTomato	2.43643	0.208108		tdTomato	2.35235	0.0936373
RJ01	Juveniles	2.19347	0.111098		Adults	2.16713	0.115764		CD02	tdTomato	2.43929	0.20685		tdTomato	2.35476	0.0929118
RJ01	Juveniles	2.19571	0.110528		Adults	2.16943	0.115138		CD02	tdTomato	2.44215	0.205591		tdTomato	2.35717	0.0921857
RJ01	Juveniles	2.19795	0.109956		Adults	2.17174	0.114515		CD02	tdTomato	2.445	0.204332		tdTomato	2.35958	0.091459
RJ01	Juveniles	2.20019	0.109383		Adults	2.17404	0.113893		CD02	tdTomato	2.44786	0.203072		tdTomato	2.36199	0.0907319
RJ01	Juveniles	2.20243	0.108809		Adults	2.17634	0.113272		CD02	tdTomato	2.45072	0.201811		tdTomato	2.3644	0.0900043
RJ01	Juveniles	2.20467	0.108233		Adults	2.17864	0.112654		CD02	tdTomato	2.45358	0.20055		tdTomato	2.36681	0.0892763
RJ01	Juveniles	2.20692	0.107656		Adults	2.18095	0.112037		CD02	tdTomato	2.45643	0.199289		tdTomato	2.36921	0.0885479
RJ01	Juveniles	2.20916	0.107078		Adults	2.18325	0.111422		CD02	tdTomato	2.45929	0.198027		tdTomato	2.37162	0.0878192
RJ01	Juveniles	2.2114	0.106498		Adults	2.18555	0.110808		CD02	tdTomato	2.46215	0.196766		tdTomato	2.37403	0.0870902
RJ01	Juveniles	2.21364	0.105917		Adults	2.18785	0.110197		CD02	tdTomato	2.46501	0.195504		tdTomato	2.37644	0.0863609
RJ01	Juveniles	2.21588	0.105336		Adults	2.19015	0.109587		CD02	tdTomato	2.46786	0.194242		tdTomato	2.37885	0.0856314
RJ01	Juveniles	2.21812	0.104752		Adults	2.19246	0.108978		CD02	tdTomato	2.47072	0.19298		tdTomato	2.38126	0.0849018
RJ01	Juveniles	2.22036	0.104168		Adults	2.19476	0.108372		CD02	tdTomato	2.47358	0.191719		tdTomato	2.38367	0.0841721
RJ01	Juveniles	2.2226	0.103583		Adults	2.19706	0.107767		CD02	tdTomato	2.47644	0.190457		tdTomato	2.38608	0.0834424
RJ01	Juveniles	2.22484	0.102997		Adults	2.19936	0.107164		CD02	tdTomato	2.47929	0.189196		tdTomato	2.38849	0.0827127
RJ01	Juveniles	2.22709	0.102409		Adults	2.20167	0.106562		CD02	tdTomato	2.48215	0.187935		tdTomato	2.3909	0.0819831
RJ01	Juveniles	2.22933	0.101821		Adults	2.20397	0.105963		CD02	tdTomato	2.48501	0.186675		tdTomato	2.39331	0.0812537
RJ01	Juveniles	2.23157	0.101231		Adults	2.20627	0.105364		CD02	tdTomato	2.48787	0.185415		tdTomato	2.39572	0.0805245
RJ01	Juveniles	2.23381	0.100641		Adults	2.20857	0.104768		CD02	tdTomato	2.49072	0.184156		tdTomato	2.39813	0.0797957
RJ01	Juveniles	2.23605	0.100049		Adults	2.21088	0.104173		CD02	tdTomato	2.49358	0.182898		tdTomato	2.40054	0.0790673
RJ01	Juveniles	2.23829	0.099457		Adults	2.21318	0.10358		CD02	tdTomato	2.49644	0.18164		tdTomato	2.40294	0.0783393
RJ01	Juveniles	2.24053	0.0988638		Adults	2.21548	0.102988		CD02	tdTomato	2.4993	0.180384		tdTomato	2.40535	0.0776119
RJ01	Juveniles	2.24277	0.0982698		Adults	2.21778	0.102398		CD02	tdTomato	2.50215	0.179128		tdTomato	2.40776	0.0768851
RJ01	Juveniles	2.24501	0.0976749		Adults	2.22008	0.101809		CD02	tdTomato	2.50501	0.177873		tdTomato	2.41017	0.076159
RJ01	Juveniles	2.24725	0.0970793		Adults	2.22239	0.101222		CD02	tdTomato	2.50787	0.17662		tdTomato	2.41258	0.0754337
RJ01	Juveniles	2.2495	0.0964829		Adults	2.22469	0.100636		CD02	tdTomato	2.51073	0.175367		tdTomato	2.41499	0.0747093
RJ01	Juveniles	2.25174	0.0958859		Adults	2.22699	0.100052		CD02	tdTomato	2.51358	0.174116		tdTomato	2.4174	0.0739859
RJ01	Juveniles	2.25398	0.0952881		Adults	2.22929	0.099469		CD02	tdTomato	2.51644	0.172866		tdTomato	2.41981	0.0732635
RJ01	Juveniles	2.25622	0.0946897		Adults	2.2316	0.0988876		CD02	tdTomato	2.5193	0.171618		tdTomato	2.42222	0.0725423
RJ01	Juveniles	2.25846	0.0940907		Adults	2.2339	0.0983075		CD02	tdTomato	2.52216	0.170371		tdTomato	2.42463	0.0718224
RJ01	Juveniles	2.2607	0.0934911		Adults	2.2362	0.0977288		CD02	tdTomato	2.52501	0.169126		tdTomato	2.42704	0.0711037
RJ01	Juveniles	2.26294	0.092891		Adults	2.2385	0.0971513		CD02	tdTomato	2.52787	0.167882		tdTomato	2.42945	0.0703865
RJ01	Juveniles	2.26518	0.0922904		Adults	2.24081	0.0965751		CD02	tdTomato	2.53073	0.16664		tdTomato	2.43186	0.0696708
RJ01	Juveniles	2.26742	0.0916894		Adults	2.24311	0.0960002		CD02	tdTomato	2.53359	0.1654		tdTomato	2.43426	0.0689567
RJ01	Juveniles	2.26967	0.0910879		Adults	2.24541	0.0954264		CD02	tdTomato	2.53644	0.164162		tdTomato	2.43667	0.0682443
RJ01	Juveniles	2.27191	0.0904861		Adults	2.24771	0.0948538		CD02	tdTomato	2.5393	0.162926		tdTomato	2.43908	0.0675338
RJ01	Juveniles	2.27415	0.0898839		Adults	2.25001	0.0942823		CD02	tdTomato	2.54216	0.161692		tdTomato	2.44149	0.0668251
RJ01	Juveniles	2.27639	0.0892814		Adults	2.25232	0.0937119		CD02	tdTomato	2.54502	0.16046		tdTomato	2.4439	0.0661184
RJ01	Juveniles	2.27863	0.0886787		Adults	2.25462	0.0931426		CD02	tdTomato	2.54787	0.15923		tdTomato	2.44631	0.0654139
RJ01	Juveniles	2.28087	0.0880757		Adults	2.25692	0.0925743		CD02	tdTomato	2.55073	0.158003		tdTomato	2.44872	0.0647115
RJ01	Juveniles	2.28311	0.0874726		Adults	2.25922	0.0920069		CD02	tdTomato	2.55359	0.156777		tdTomato	2.45113	0.0640114
RJ01	Juveniles	2.28535	0.0868693		Adults	2.26153	0.0914406		CD02	tdTomato	2.55645	0.155555		tdTomato	2.45354	0.0633136
RJ01	Juveniles	2.28759	0.086266		Adults	2.26383	0.0908751		CD02	tdTomato	2.5593	0.154334		tdTomato	2.45595	0.0626184
RJ01	Juveniles	2.28983	0.0856626		Adults	2.26613	0.0903105		CD02	tdTomato	2.56216	0.153117		tdTomato	2.45836	0.0619257
RJ01	Juveniles	2.29208	0.0850591		Adults	2.26843	0.0897468		CD02	tdTomato	2.56502	0.151902		tdTomato	2.46077	0.0612357
RJ01	Juveniles	2.29432	0.0844558		Adults	2.27074	0.0891839		CD02	tdTomato	2.56788	0.15069		tdTomato	2.46318	0.0605485
RJ01	Juveniles	2.29656	0.0838524		Adults	2.27304	0.0886219		CD02	tdTomato	2.57073	0.14948		tdTomato	2.46559	0.0598641
RJ01	Juveniles	2.2988	0.0832492		Adults	2.27534	0.0880605		CD02	tdTomato	2.57359	0.148273		tdTomato	2.46799	0.0591827
RJ01	Juveniles	2.30104	0.0826462		Adults	2.27764	0.0874999		CD02	tdTomato	2.57645	0.14707		tdTomato	2.4704	0.0585043
RJ01	Juveniles	2.30328	0.0820434		Adults	2.27994	0.0869401		CD02	tdTomato	2.57931	0.145869		tdTomato	2.47281	0.057829
RJ01	Juveniles	2.30552	0.0814408		Adults	2.28225	0.0863809		CD02	tdTomato	2.58216	0.144672		tdTomato	2.47522	0.057157
RJ01	Juveniles	2.30776	0.0808385		Adults	2.28455	0.0858223		CD02	tdTomato	2.58502	0.143477		tdTomato	2.47763	0.0564883
RJ01	Juveniles	2.31	0.0802365		Adults	2.28685	0.0852644		CD02	tdTomato	2.58788	0.142286		tdTomato	2.48004	0.055823
RJ01	Juveniles	2.31225	0.079635		Adults	2.28915	0.0847072		CD02	tdTomato	2.59074	0.141098		tdTomato	2.48245	0.0551611
RJ01	Juveniles	2.31449	0.0790338		Adults	2.29146	0.0841505		CD02	tdTomato	2.59359	0.139913		tdTomato	2.48486	0.0545029
RJ01	Juveniles	2.31673	0.0784331		Adults	2.29376	0.0835944		CD02	tdTomato	2.59645	0.138732		tdTomato	2.48727	0.0538483
RJ01	Juveniles	2.31897	0.0778329		Adults	2.29606	0.0830389		CD02	tdTomato	2.59931	0.137555		tdTomato	2.48968	0.0531975
RJ01	Juveniles	2.32121	0.0772333		Adults	2.29836	0.0824839		CD02	tdTomato	2.60217	0.136381		tdTomato	2.49209	0.0525505
RJ01	Juveniles	2.32345	0.0766343		Adults	2.30067	0.0819295		CD02	tdTomato	2.60502	0.13521		tdTomato	2.4945	0.0519074
RJ01	Juveniles	2.32569	0.0760359		Adults	2.30297	0.0813756		CD02	tdTomato	2.60788	0.134043		tdTomato	2.49691	0.0512683
RJ01	Juveniles	2.32793	0.0754382		Adults	2.30527	0.0808223		CD02	tdTomato	2.61074	0.13288		tdTomato	2.49931	0.0506332
RJ01	Juveniles	2.33017	0.0748412		Adults	2.30757	0.0802695		CD02	tdTomato	2.6136	0.131721		tdTomato	2.50172	0.0500023
RJ01	Juveniles	2.33242	0.074245		Adults	2.30987	0.0797172		CD02	tdTomato	2.61645	0.130566		tdTomato	2.50413	0.0493756
RJ01	Juveniles	2.33466	0.0736497		Adults	2.31218	0.0791654		CD02	tdTomato	2.61931	0.129414		tdTomato	2.50654	0.0487532
RJ01	Juveniles	2.3369	0.0730552		Adults	2.31448	0.0786142		CD02	tdTomato	2.62217	0.128267		tdTomato	2.50895	0.0481352
RJ01	Juveniles	2.33914	0.0724616		Adults	2.31678	0.0780635		CD02	tdTomato	2.62503	0.127124		tdTomato	2.51136	0.0475215
RJ01	Juveniles	2.34138	0.0718689		Adults	2.31908	0.0775133		CD02	tdTomato	2.62788	0.125984		tdTomato	2.51377	0.0469124
RJ01	Juveniles	2.34362	0.0712773		Adults	2.32139	0.0769637		CD02	tdTomato	2.63074	0.124849		tdTomato	2.51618	0.0463078
RJ01	Juveniles	2.34586	0.0706866		Adults	2.32369	0.0764147		CD02	tdTomato	2.6336	0.123719		tdTomato	2.51859	0.0457078
RJ01	Juveniles	2.3481	0.0700971		Adults	2.32599	0.0758663		CD02	tdTomato	2.63646	0.122592		tdTomato	2.521	0.0451125
RJ01	Juveniles	2.35034	0.0695087		Adults	2.32829	0.0753185		CD02	tdTomato	2.63931	0.12147		tdTomato	2.52341	0.0445219
RJ01	Juveniles	2.35258	0.0689215		Adults	2.3306	0.0747713		CD02	tdTomato	2.64217	0.120353		tdTomato	2.52582	0.0439362
RJ01	Juveniles	2.35483	0.0683354		Adults	2.3329	0.0742247		CD02	tdTomato	2.64503	0.119239		tdTomato	2.52823	0.0433552
RJ01	Juveniles	2.35707	0.0677507		Adults	2.3352	0.0736789		CD02	tdTomato	2.64789	0.118131		tdTomato	2.53064	0.0427792
RJ01	Juveniles	2.35931	0.0671672		Adults	2.3375	0.0731337		CD02	tdTomato	2.65075	0.117027		tdTomato	2.53304	0.0422081
RJ01	Juveniles	2.36155	0.0665851		Adults	2.3398	0.0725893		CD02	tdTomato	2.6536	0.115927		tdTomato	2.53545	0.041642
RJ01	Juveniles	2.36379	0.0660043		Adults	2.34211	0.0720457		CD02	tdTomato	2.65646	0.114832		tdTomato	2.53786	0.0410809
RJ01	Juveniles	2.36603	0.065425		Adults	2.34441	0.0715028		CD02	tdTomato	2.65932	0.113742		tdTomato	2.54027	0.0405249
RJ01	Juveniles	2.36827	0.0648472		Adults	2.34671	0.0709608		CD02	tdTomato	2.66218	0.112657		tdTomato	2.54268	0.0399741
RJ01	Juveniles	2.37051	0.0642708		Adults	2.34901	0.0704197		CD02	tdTomato	2.66503	0.111577		tdTomato	2.54509	0.0394284
RJ01	Juveniles	2.37275	0.0636961		Adults	2.35132	0.0698795		CD02	tdTomato	2.66789	0.110501		tdTomato	2.5475	0.0388879
RJ01	Juveniles	2.375	0.0631229		Adults	2.35362	0.0693403		CD02	tdTomato	2.67075	0.109431		tdTomato	2.54991	0.0383526
RJ01	Juveniles	2.37724	0.0625513		Adults	2.35592	0.0688021		CD02	tdTomato	2.67361	0.108365		tdTomato	2.55232	0.0378226
RJ01	Juveniles	2.37948	0.0619814		Adults	2.35822	0.068265		CD02	tdTomato	2.67646	0.107304		tdTomato	2.55473	0.0372979
RJ01	Juveniles	2.38172	0.0614132		Adults	2.36053	0.0677289		CD02	tdTomato	2.67932	0.106249		tdTomato	2.55714	0.0367785
RJ01	Juveniles	2.38396	0.0608468		Adults	2.36283	0.067194		CD02	tdTomato	2.68218	0.105199		tdTomato	2.55955	0.0362645
RJ01	Juveniles	2.3862	0.0602822		Adults	2.36513	0.0666604		CD02	tdTomato	2.68504	0.104154		tdTomato	2.56196	0.0357558
RJ01	Juveniles	2.38844	0.0597194		Adults	2.36743	0.066128		CD02	tdTomato	2.68789	0.103114		tdTomato	2.56436	0.0352525
RJ01	Juveniles	2.39068	0.0591584		Adults	2.36974	0.0655969		CD02	tdTomato	2.69075	0.102079		tdTomato	2.56677	0.0347547
RJ01	Juveniles	2.39292	0.0585994		Adults	2.37204	0.0650672		CD02	tdTomato	2.69361	0.101049		tdTomato	2.56918	0.0342622
RJ01	Juveniles	2.39516	0.0580424		Adults	2.37434	0.064539		CD02	tdTomato	2.69647	0.100025		tdTomato	2.57159	0.0337753
RJ01	Juveniles	2.39741	0.0574873		Adults	2.37664	0.0640122		CD02	tdTomato	2.69932	0.0990067		tdTomato	2.574	0.0332937
RJ01	Juveniles	2.39965	0.0569342		Adults	2.37894	0.063487		CD02	tdTomato	2.70218	0.0979935		tdTomato	2.57641	0.0328177
RJ01	Juveniles	2.40189	0.0563832		Adults	2.38125	0.0629633		CD02	tdTomato	2.70504	0.0969856		tdTomato	2.57882	0.0323471
RJ01	Juveniles	2.40413	0.0558343		Adults	2.38355	0.0624414		CD02	tdTomato	2.7079	0.0959833		tdTomato	2.58123	0.031882
RJ01	Juveniles	2.40637	0.0552875		Adults	2.38585	0.0619211		CD02	tdTomato	2.71075	0.0949865		tdTomato	2.58364	0.0314224
RJ01	Juveniles	2.40861	0.0547429		Adults	2.38815	0.0614027		CD02	tdTomato	2.71361	0.0939953		tdTomato	2.58605	0.0309684
RJ01	Juveniles	2.41085	0.0542005		Adults	2.39046	0.0608861		CD02	tdTomato	2.71647	0.0930097		tdTomato	2.58846	0.0305198
RJ01	Juveniles	2.41309	0.0536603		Adults	2.39276	0.0603714		CD02	tdTomato	2.71933	0.0920297		tdTomato	2.59087	0.0300767
RJ01	Juveniles	2.41533	0.0531224		Adults	2.39506	0.0598586		CD02	tdTomato	2.72218	0.0910553		tdTomato	2.59328	0.0296391
RJ01	Juveniles	2.41758	0.0525868		Adults	2.39736	0.0593479		CD02	tdTomato	2.72504	0.0900867		tdTomato	2.59569	0.0292069
RJ01	Juveniles	2.41982	0.0520535		Adults	2.39967	0.0588393		CD02	tdTomato	2.7279	0.0891238		tdTomato	2.59809	0.0287803
RJ01	Juveniles	2.42206	0.0515226		Adults	2.40197	0.0583327		CD02	tdTomato	2.73076	0.0881666		tdTomato	2.6005	0.0283592
RJ01	Juveniles	2.4243	0.0509941		Adults	2.40427	0.0578284		CD02	tdTomato	2.73361	0.0872152		tdTomato	2.60291	0.0279435
RJ01	Juveniles	2.42654	0.050468		Adults	2.40657	0.0573263		CD02	tdTomato	2.73647	0.0862697		tdTomato	2.60532	0.0275333
RJ01	Juveniles	2.42878	0.0499444		Adults	2.40887	0.0568265		CD02	tdTomato	2.73933	0.08533		tdTomato	2.60773	0.0271285
RJ01	Juveniles	2.43102	0.0494233		Adults	2.41118	0.0563291		CD02	tdTomato	2.74219	0.0843961		tdTomato	2.61014	0.0267291
RJ01	Juveniles	2.43326	0.0489047		Adults	2.41348	0.055834		CD02	tdTomato	2.74504	0.0834682		tdTomato	2.61255	0.0263352
RJ01	Juveniles	2.4355	0.0483887		Adults	2.41578	0.0553414		CD02	tdTomato	2.7479	0.0825461		tdTomato	2.61496	0.0259467
RJ01	Juveniles	2.43775	0.0478752		Adults	2.41808	0.0548513		CD02	tdTomato	2.75076	0.08163		tdTomato	2.61737	0.0255635
RJ01	Juveniles	2.43999	0.0473644		Adults	2.42039	0.0543638		CD02	tdTomato	2.75362	0.0807199		tdTomato	2.61978	0.0251857
RJ01	Juveniles	2.44223	0.0468562		Adults	2.42269	0.0538788		CD02	tdTomato	2.75647	0.0798157		tdTomato	2.62219	0.0248132
RJ01	Juveniles	2.44447	0.0463507		Adults	2.42499	0.0533965		CD02	tdTomato	2.75933	0.0789175		tdTomato	2.6246	0.0244461
RJ01	Juveniles	2.44671	0.0458478		Adults	2.42729	0.0529169		CD02	tdTomato	2.76219	0.0780254		tdTomato	2.62701	0.0240842
RJ01	Juveniles	2.44895	0.0453477		Adults	2.4296	0.0524399		CD02	tdTomato	2.76505	0.0771393		tdTomato	2.62941	0.0237276
RJ01	Juveniles	2.45119	0.0448503		Adults	2.4319	0.0519657		CD02	tdTomato	2.7679	0.0762593		tdTomato	2.63182	0.0233763
RJ01	Juveniles	2.45343	0.0443557		Adults	2.4342	0.0514943		CD02	tdTomato	2.77076	0.0753853		tdTomato	2.63423	0.0230301
RJ01	Juveniles	2.45567	0.0438639		Adults	2.4365	0.0510257		CD02	tdTomato	2.77362	0.0745175		tdTomato	2.63664	0.0226892
RJ01	Juveniles	2.45791	0.0433749		Adults	2.4388	0.05056		CD02	tdTomato	2.77648	0.0736557		tdTomato	2.63905	0.0223533
RJ01	Juveniles	2.46016	0.0428887		Adults	2.44111	0.0500971		CD02	tdTomato	2.77933	0.0728001		tdTomato	2.64146	0.0220226
RJ01	Juveniles	2.4624	0.0424054		Adults	2.44341	0.0496371		CD02	tdTomato	2.78219	0.0719506		tdTomato	2.64387	0.021697
RJ01	Juveniles	2.46464	0.041925		Adults	2.44571	0.04918		CD02	tdTomato	2.78505	0.0711073		tdTomato	2.64628	0.0213764
RJ01	Juveniles	2.46688	0.0414475		Adults	2.44801	0.0487259		CD02	tdTomato	2.78791	0.0702701		tdTomato	2.64869	0.0210609
RJ01	Juveniles	2.46912	0.040973		Adults	2.45032	0.0482747		CD02	tdTomato	2.79076	0.0694391		tdTomato	2.6511	0.0207503
RJ01	Juveniles	2.47136	0.0405013		Adults	2.45262	0.0478264		CD02	tdTomato	2.79362	0.0686142		tdTomato	2.65351	0.0204446
RJ01	Juveniles	2.4736	0.0400327		Adults	2.45492	0.0473812		CD02	tdTomato	2.79648	0.0677956		tdTomato	2.65592	0.0201439
RJ01	Juveniles	2.47584	0.039567		Adults	2.45722	0.0469389		CD02	tdTomato	2.79934	0.0669831		tdTomato	2.65833	0.019848
RJ01	Juveniles	2.47808	0.0391044		Adults	2.45953	0.0464996		CD02	tdTomato	2.80219	0.0661769		tdTomato	2.66074	0.0195569
RJ01	Juveniles	2.48033	0.0386447		Adults	2.46183	0.0460633		CD02	tdTomato	2.80505	0.0653768		tdTomato	2.66314	0.0192706
RJ01	Juveniles	2.48257	0.0381881		Adults	2.46413	0.04563		CD02	tdTomato	2.80791	0.064583		tdTomato	2.66555	0.0189891
RJ01	Juveniles	2.48481	0.0377346		Adults	2.46643	0.0451997		CD02	tdTomato	2.81077	0.0637954		tdTomato	2.66796	0.0187122
RJ01	Juveniles	2.48705	0.0372841		Adults	2.46873	0.0447723		CD02	tdTomato	2.81362	0.063014		tdTomato	2.67037	0.01844
RJ01	Juveniles	2.48929	0.0368367		Adults	2.47104	0.044348		CD02	tdTomato	2.81648	0.0622389		tdTomato	2.67278	0.0181724
RJ01	Juveniles	2.49153	0.0363925		Adults	2.47334	0.0439266		CD02	tdTomato	2.81934	0.06147		tdTomato	2.67519	0.0179094
RJ01	Juveniles	2.49377	0.0359513		Adults	2.47564	0.0435081		CD02	tdTomato	2.8222	0.0607073		tdTomato	2.6776	0.0176509
RJ01	Juveniles	2.49601	0.0355133		Adults	2.47794	0.0430926		CD02	tdTomato	2.82505	0.0599508		tdTomato	2.68001	0.0173969
RJ01	Juveniles	2.49825	0.0350784		Adults	2.48025	0.04268		CD02	tdTomato	2.82791	0.0592006		tdTomato	2.68242	0.0171473
RJ01	Juveniles	2.5005	0.0346467		Adults	2.48255	0.0422703		CD02	tdTomato	2.83077	0.0584566		tdTomato	2.68483	0.016902
RJ01	Juveniles	2.50274	0.0342181		Adults	2.48485	0.0418635		CD02	tdTomato	2.83363	0.0577188		tdTomato	2.68724	0.0166611
RJ01	Juveniles	2.50498	0.0337928		Adults	2.48715	0.0414596		CD02	tdTomato	2.83648	0.0569873		tdTomato	2.68965	0.0164245
RJ01	Juveniles	2.50722	0.0333706		Adults	2.48946	0.0410584		CD02	tdTomato	2.83934	0.0562619		tdTomato	2.69206	0.0161921
RJ01	Juveniles	2.50946	0.0329516		Adults	2.49176	0.0406601		CD02	tdTomato	2.8422	0.0555428		tdTomato	2.69446	0.0159639
RJ01	Juveniles	2.5117	0.0325358		Adults	2.49406	0.0402645		CD02	tdTomato	2.84506	0.0548299		tdTomato	2.69687	0.0157398
RJ01	Juveniles	2.51394	0.0321233		Adults	2.49636	0.0398717		CD02	tdTomato	2.84791	0.0541232		tdTomato	2.69928	0.0155198
RJ01	Juveniles	2.51618	0.0317139		Adults	2.49866	0.0394816		CD02	tdTomato	2.85077	0.0534227		tdTomato	2.70169	0.0153038
RJ01	Juveniles	2.51842	0.0313078		Adults	2.50097	0.0390942		CD02	tdTomato	2.85363	0.0527284		tdTomato	2.7041	0.0150918
RJ01	Juveniles	2.52066	0.030905		Adults	2.50327	0.0387093		CD02	tdTomato	2.85649	0.0520402		tdTomato	2.70651	0.0148837
RJ01	Juveniles	2.52291	0.0305054		Adults	2.50557	0.0383271		CD02	tdTomato	2.85934	0.0513582		tdTomato	2.70892	0.0146795
RJ01	Juveniles	2.52515	0.030109		Adults	2.50787	0.0379475		CD02	tdTomato	2.8622	0.0506824		tdTomato	2.71133	0.0144792
RJ01	Juveniles	2.52739	0.029716		Adults	2.51018	0.0375703		CD02	tdTomato	2.86506	0.0500128		tdTomato	2.71374	0.0142826
RJ01	Juveniles	2.52963	0.0293261		Adults	2.51248	0.0371957		CD02	tdTomato	2.86792	0.0493493		tdTomato	2.71615	0.0140897
RJ01	Juveniles	2.53187	0.0289396		Adults	2.51478	0.0368234		CD02	tdTomato	2.87078	0.0486919		tdTomato	2.71856	0.0139004
RJ01	Juveniles	2.53411	0.0285563		Adults	2.51708	0.0364536		CD02	tdTomato	2.87363	0.0480406		tdTomato	2.72097	0.0137148
RJ01	Juveniles	2.53635	0.0281763		Adults	2.51939	0.0360861		CD02	tdTomato	2.87649	0.0473954		tdTomato	2.72338	0.0135327
RJ01	Juveniles	2.53859	0.0277996		Adults	2.52169	0.0357209		CD02	tdTomato	2.87935	0.0467563		tdTomato	2.72579	0.0133541
RJ01	Juveniles	2.54083	0.0274261		Adults	2.52399	0.035358		CD02	tdTomato	2.88221	0.0461233		tdTomato	2.72819	0.013179
RJ01	Juveniles	2.54308	0.0270559		Adults	2.52629	0.0349973		CD02	tdTomato	2.88506	0.0454963		tdTomato	2.7306	0.0130072
RJ01	Juveniles	2.54532	0.0266891		Adults	2.52859	0.0346388		CD02	tdTomato	2.88792	0.0448754		tdTomato	2.73301	0.0128388
RJ01	Juveniles	2.54756	0.0263255		Adults	2.5309	0.0342824		CD02	tdTomato	2.89078	0.0442605		tdTomato	2.73542	0.0126736
RJ01	Juveniles	2.5498	0.0259651		Adults	2.5332	0.0339281		CD02	tdTomato	2.89364	0.0436516		tdTomato	2.73783	0.0125117
RJ01	Juveniles	2.55204	0.0256081		Adults	2.5355	0.0335758		CD02	tdTomato	2.89649	0.0430487		tdTomato	2.74024	0.0123529
RJ01	Juveniles	2.55428	0.0252543		Adults	2.5378	0.0332256		CD02	tdTomato	2.89935	0.0424518		tdTomato	2.74265	0.0121972
RJ01	Juveniles	2.55652	0.0249038		Adults	2.54011	0.0328773		CD02	tdTomato	2.90221	0.0418608		tdTomato	2.74506	0.0120446
RJ01	Juveniles	2.55876	0.0245566		Adults	2.54241	0.0325309		CD02	tdTomato	2.90507	0.0412757		tdTomato	2.74747	0.011895
RJ01	Juveniles	2.561	0.0242127		Adults	2.54471	0.0321864		CD02	tdTomato	2.90792	0.0406966		tdTomato	2.74988	0.0117484
RJ01	Juveniles	2.56324	0.023872		Adults	2.54701	0.0318438		CD02	tdTomato	2.91078	0.0401233		tdTomato	2.75229	0.0116046
RJ01	Juveniles	2.56549	0.0235346		Adults	2.54932	0.0315029		CD02	tdTomato	2.91364	0.0395559		tdTomato	2.7547	0.0114637
RJ01	Juveniles	2.56773	0.0232005		Adults	2.55162	0.0311638		CD02	tdTomato	2.9165	0.0389944		tdTomato	2.75711	0.0113255
RJ01	Juveniles	2.56997	0.0228696		Adults	2.55392	0.0308265		CD02	tdTomato	2.91935	0.0384387		tdTomato	2.75951	0.01119
RJ01	Juveniles	2.57221	0.022542		Adults	2.55622	0.0304908		CD02	tdTomato	2.92221	0.0378888		tdTomato	2.76192	0.0110572
RJ01	Juveniles	2.57445	0.0222176		Adults	2.55852	0.0301568		CD02	tdTomato	2.92507	0.0373446		tdTomato	2.76433	0.0109271
RJ01	Juveniles	2.57669	0.0218964		Adults	2.56083	0.0298244		CD02	tdTomato	2.92793	0.0368062		tdTomato	2.76674	0.0107994
RJ01	Juveniles	2.57893	0.0215785		Adults	2.56313	0.0294937		CD02	tdTomato	2.93078	0.0362735		tdTomato	2.76915	0.0106743
RJ01	Juveniles	2.58117	0.0212638		Adults	2.56543	0.0291645		CD02	tdTomato	2.93364	0.0357466		tdTomato	2.77156	0.0105516
RJ01	Juveniles	2.58341	0.0209523		Adults	2.56773	0.0288368		CD02	tdTomato	2.9365	0.0352253		tdTomato	2.77397	0.0104313
RJ01	Juveniles	2.58566	0.0206441		Adults	2.57004	0.0285106		CD02	tdTomato	2.93936	0.0347096		tdTomato	2.77638	0.0103134
RJ01	Juveniles	2.5879	0.020339		Adults	2.57234	0.028186		CD02	tdTomato	2.94221	0.0341996		tdTomato	2.77879	0.0101977
RJ01	Juveniles	2.59014	0.0200371		Adults	2.57464	0.0278628		CD02	tdTomato	2.94507	0.0336951		tdTomato	2.7812	0.0100843
RJ01	Juveniles	2.59238	0.0197385		Adults	2.57694	0.0275411		CD02	tdTomato	2.94793	0.0331963		tdTomato	2.78361	0.00997297
RJ01	Juveniles	2.59462	0.0194429		Adults	2.57925	0.0272208		CD02	tdTomato	2.95079	0.0327029		tdTomato	2.78602	0.0098638
RJ01	Juveniles	2.59686	0.0191506		Adults	2.58155	0.0269019		CD02	tdTomato	2.95364	0.0322151		tdTomato	2.78843	0.0097567
RJ01	Juveniles	2.5991	0.0188614		Adults	2.58385	0.0265844		CD02	tdTomato	2.9565	0.0317328		tdTomato	2.79084	0.00965161
RJ01	Juveniles	2.60134	0.0185753		Adults	2.58615	0.0262683		CD02	tdTomato	2.95936	0.0312559		tdTomato	2.79324	0.00954848
RJ01	Juveniles	2.60358	0.0182924		Adults	2.58845	0.0259536		CD02	tdTomato	2.96222	0.0307844		tdTomato	2.79565	0.00944725
RJ01	Juveniles	2.60583	0.0180126		Adults	2.59076	0.0256403		CD02	tdTomato	2.96507	0.0303183		tdTomato	2.79806	0.00934788
RJ01	Juveniles	2.60807	0.0177359		Adults	2.59306	0.0253283		CD02	tdTomato	2.96793	0.0298576		tdTomato	2.80047	0.00925032
RJ01	Juveniles	2.61031	0.0174623		Adults	2.59536	0.0250177		CD02	tdTomato	2.97079	0.0294022		tdTomato	2.80288	0.0091545
RJ01	Juveniles	2.61255	0.0171917		Adults	2.59766	0.0247085		CD02	tdTomato	2.97365	0.0289522		tdTomato	2.80529	0.00906039
RJ01	Juveniles	2.61479	0.0169243		Adults	2.59997	0.0244006		CD02	tdTomato	2.9765	0.0285073		tdTomato	2.8077	0.00896793
RJ01	Juveniles	2.61703	0.0166599		Adults	2.60227	0.0240941		CD02	tdTomato	2.97936	0.0280678		tdTomato	2.81011	0.00887707
RJ01	Juveniles	2.61927	0.0163985		Adults	2.60457	0.023789		CD02	tdTomato	2.98222	0.0276334		tdTomato	2.81252	0.00878776
RJ01	Juveniles	2.62151	0.0161401		Adults	2.60687	0.0234853		CD02	tdTomato	2.98508	0.0272042		tdTomato	2.81493	0.00869996
RJ01	Juveniles	2.62375	0.0158848		Adults	2.60918	0.0231829		CD02	tdTomato	2.98793	0.0267801		tdTomato	2.81734	0.00861362
RJ01	Juveniles	2.62599	0.0156325		Adults	2.61148	0.022882		CD02	tdTomato	2.99079	0.0263611		tdTomato	2.81975	0.00852869
RJ01	Juveniles	2.62824	0.0153831		Adults	2.61378	0.0225825		CD02	tdTomato	2.99365	0.0259472		tdTomato	2.82216	0.00844512
RJ01	Juveniles	2.63048	0.0151367		Adults	2.61608	0.0222843		CD02	tdTomato	2.99651	0.0255383		tdTomato	2.82456	0.00836287
RJ01	Juveniles	2.63272	0.0148933		Adults	2.61838	0.0219877		CD02	tdTomato	2.99936	0.0251345		tdTomato	2.82697	0.00828188
RJ01	Juveniles	2.63496	0.0146528		Adults	2.62069	0.0216924		CD02	tdTomato	3.00222	0.0247356		tdTomato	2.82938	0.00820213
RJ01	Juveniles	2.6372	0.0144152		Adults	2.62299	0.0213987		CD02	tdTomato	3.00508	0.0243416		tdTomato	2.83179	0.00812356
RJ01	Juveniles	2.63944	0.0141805		Adults	2.62529	0.0211065		CD02	tdTomato	3.00794	0.0239526		tdTomato	2.8342	0.00804613
RJ01	Juveniles	2.64168	0.0139487		Adults	2.62759	0.0208157		CD02	tdTomato	3.01079	0.0235684		tdTomato	2.83661	0.00796979
RJ01	Juveniles	2.64392	0.0137197		Adults	2.6299	0.0205265		CD02	tdTomato	3.01365	0.023189		tdTomato	2.83902	0.00789451
RJ01	Juveniles	2.64616	0.0134937		Adults	2.6322	0.0202389		CD02	tdTomato	3.01651	0.0228144		tdTomato	2.84143	0.00782024
RJ01	Juveniles	2.64841	0.0132704		Adults	2.6345	0.0199529		CD02	tdTomato	3.01937	0.0224446		tdTomato	2.84384	0.00774695
RJ01	Juveniles	2.65065	0.01305		Adults	2.6368	0.0196685		CD02	tdTomato	3.02222	0.0220795		tdTomato	2.84625	0.00767458
RJ01	Juveniles	2.65289	0.0128323		Adults	2.63911	0.0193857		CD02	tdTomato	3.02508	0.0217191		tdTomato	2.84866	0.00760312
RJ01	Juveniles	2.65513	0.0126174		Adults	2.64141	0.0191046		CD02	tdTomato	3.02794	0.0213633		tdTomato	2.85107	0.00753251
RJ01	Juveniles	2.65737	0.0124053		Adults	2.64371	0.0188252		CD02	tdTomato	3.0308	0.0210122		tdTomato	2.85348	0.00746271
RJ01	Juveniles	2.65961	0.012196		Adults	2.64601	0.0185476		CD02	tdTomato	3.03365	0.0206656		tdTomato	2.85589	0.00739371
RJ01	Juveniles	2.66185	0.0119893		Adults	2.64831	0.0182717		CD02	tdTomato	3.03651	0.0203236		tdTomato	2.85829	0.00732544
RJ01	Juveniles	2.66409	0.0117854		Adults	2.65062	0.0179976		CD02	tdTomato	3.03937	0.0199861		tdTomato	2.8607	0.0072579
RJ01	Juveniles	2.66633	0.0115841		Adults	2.65292	0.0177254		CD02	tdTomato	3.04223	0.019653		tdTomato	2.86311	0.00719103
RJ01	Juveniles	2.66858	0.0113855		Adults	2.65522	0.017455		CD02	tdTomato	3.04508	0.0193244		tdTomato	2.86552	0.0071248
RJ01	Juveniles	2.67082	0.0111896		Adults	2.65752	0.0171865		CD02	tdTomato	3.04794	0.0190002		tdTomato	2.86793	0.00705919
RJ01	Juveniles	2.67306	0.0109963		Adults	2.65983	0.0169199		CD02	tdTomato	3.0508	0.0186803		tdTomato	2.87034	0.00699416
RJ01	Juveniles	2.6753	0.0108055		Adults	2.66213	0.0166553		CD02	tdTomato	3.05366	0.0183647		tdTomato	2.87275	0.00692969
RJ01	Juveniles	2.67754	0.0106174		Adults	2.66443	0.0163926		CD02	tdTomato	3.05651	0.0180534		tdTomato	2.87516	0.00686573
RJ01	Juveniles	2.67978	0.0104318		Adults	2.66673	0.016132		CD02	tdTomato	3.05937	0.0177464		tdTomato	2.87757	0.00680227
RJ01	Juveniles	2.68202	0.0102488		Adults	2.66904	0.0158735		CD02	tdTomato	3.06223	0.0174436		tdTomato	2.87998	0.00673928
RJ01	Juveniles	2.68426	0.0100683		Adults	2.67134	0.0156171		CD02	tdTomato	3.06509	0.0171449		tdTomato	2.88239	0.00667673
RJ01	Juveniles	2.6865	0.00989032		Adults	2.67364	0.0153627		CD02	tdTomato	3.06794	0.0168504		tdTomato	2.8848	0.00661459
RJ01	Juveniles	2.68874	0.00971481		Adults	2.67594	0.0151106		CD02	tdTomato	3.0708	0.01656		tdTomato	2.88721	0.00655285
RJ01	Juveniles	2.69099	0.00954176		Adults	2.67825	0.0148606		CD02	tdTomato	3.07366	0.0162736		tdTomato	2.88961	0.00649147
RJ01	Juveniles	2.69323	0.00937115		Adults	2.68055	0.0146128		CD02	tdTomato	3.07652	0.0159912		tdTomato	2.89202	0.00643043
RJ01	Juveniles	2.69547	0.00920296		Adults	2.68285	0.0143673		CD02	tdTomato	3.07937	0.0157128		tdTomato	2.89443	0.00636972
RJ01	Juveniles	2.69771	0.00903716		Adults	2.68515	0.0141241		CD02	tdTomato	3.08223	0.0154384		tdTomato	2.89684	0.0063093
RJ01	Juveniles	2.69995	0.00887375		Adults	2.68745	0.0138831		CD02	tdTomato	3.08509	0.0151679		tdTomato	2.89925	0.00624917
RJ01	Juveniles	2.70219	0.00871269		Adults	2.68976	0.0136445		CD02	tdTomato	3.08795	0.0149012		tdTomato	2.90166	0.0061893
RJ01	Juveniles	2.70443	0.00855397		Adults	2.69206	0.0134083		CD02	tdTomato	3.0908	0.0146384		tdTomato	2.90407	0.00612967
RJ01	Juveniles	2.70667	0.00839756		Adults	2.69436	0.0131744		CD02	tdTomato	3.09366	0.0143794		tdTomato	2.90648	0.00607027
RJ01	Juveniles	2.70891	0.00824344		Adults	2.69666	0.012943		CD02	tdTomato	3.09652	0.0141241		tdTomato	2.90889	0.00601108
RJ01	Juveniles	2.71116	0.0080916		Adults	2.69897	0.012714		CD02	tdTomato	3.09938	0.0138725		tdTomato	2.9113	0.00595208
RJ01	Juveniles	2.7134	0.007942		Adults	2.70127	0.0124874		CD02	tdTomato	3.10224	0.0136246		tdTomato	2.91371	0.00589327
RJ01	Juveniles	2.71564	0.00779463		Adults	2.70357	0.0122634		CD02	tdTomato	3.10509	0.0133804		tdTomato	2.91612	0.00583462
RJ01	Juveniles	2.71788	0.00764947		Adults	2.70587	0.0120418		CD02	tdTomato	3.10795	0.0131398		tdTomato	2.91853	0.00577612
RJ01	Juveniles	2.72012	0.0075065		Adults	2.70818	0.0118227		CD02	tdTomato	3.11081	0.0129027		tdTomato	2.92094	0.00571777
RJ01	Juveniles	2.72236	0.00736568		Adults	2.71048	0.0116062		CD02	tdTomato	3.11367	0.0126692		tdTomato	2.92334	0.00565955
RJ01	Juveniles	2.7246	0.00722701		Adults	2.71278	0.0113923		CD02	tdTomato	3.11652	0.0124392		tdTomato	2.92575	0.00560145
RJ01	Juveniles	2.72684	0.00709046		Adults	2.71508	0.0111809		CD02	tdTomato	3.11938	0.0122126		tdTomato	2.92816	0.00554346
RJ01	Juveniles	2.72908	0.006956		Adults	2.71738	0.0109721		CD02	tdTomato	3.12224	0.0119894		tdTomato	2.93057	0.00548558
RJ01	Juveniles	2.73132	0.00682362		Adults	2.71969	0.0107658		CD02	tdTomato	3.1251	0.0117696		tdTomato	2.93298	0.0054278
RJ01	Juveniles	2.73357	0.0066933		Adults	2.72199	0.0105622		CD02	tdTomato	3.12795	0.0115532		tdTomato	2.93539	0.0053701
RJ01	Juveniles	2.73581	0.00656501		Adults	2.72429	0.0103612		CD02	tdTomato	3.13081	0.0113401		tdTomato	2.9378	0.00531249
RJ01	Juveniles	2.73805	0.00643873		Adults	2.72659	0.0101628		CD02	tdTomato	3.13367	0.0111303		tdTomato	2.94021	0.00525496
RJ01	Juveniles	2.74029	0.00631444		Adults	2.7289	0.00996705		CD02	tdTomato	3.13653	0.0109237		tdTomato	2.94262	0.0051975
RJ01	Juveniles	2.74253	0.00619212		Adults	2.7312	0.00977392		CD02	tdTomato	3.13938	0.0107203		tdTomato	2.94503	0.00514012
RJ01	Juveniles	2.74477	0.00607174		Adults	2.7335	0.00958343		CD02	tdTomato	3.14224	0.01052		tdTomato	2.94744	0.0050828
RJ01	Juveniles	2.74701	0.00595329		Adults	2.7358	0.00939557		CD02	tdTomato	3.1451	0.0103229		tdTomato	2.94985	0.00502556
RJ01	Juveniles	2.74925	0.00583675		Adults	2.73811	0.00921035		CD02	tdTomato	3.14796	0.0101289		tdTomato	2.95226	0.00496837
RJ01	Juveniles	2.75149	0.00572208		Adults	2.74041	0.00902777		CD02	tdTomato	3.15081	0.00993794		tdTomato	2.95466	0.00491125
RJ01	Juveniles	2.75374	0.00560928		Adults	2.74271	0.00884782		CD02	tdTomato	3.15367	0.00975		tdTomato	2.95707	0.0048542
RJ01	Juveniles	2.75598	0.00549831		Adults	2.74501	0.0086705		CD02	tdTomato	3.15653	0.00956506		tdTomato	2.95948	0.00479721
RJ01	Juveniles	2.75822	0.00538917		Adults	2.74731	0.00849581		CD02	tdTomato	3.15939	0.00938306		tdTomato	2.96189	0.00474029
RJ01	Juveniles	2.76046	0.00528182		Adults	2.74962	0.00832374		CD02	tdTomato	3.16224	0.00920398		tdTomato	2.9643	0.00468344
RJ01	Juveniles	2.7627	0.00517625		Adults	2.75192	0.00815428		CD02	tdTomato	3.1651	0.00902778		tdTomato	2.96671	0.00462666
RJ01	Juveniles	2.76494	0.00507243		Adults	2.75422	0.00798742		CD02	tdTomato	3.16796	0.00885443		tdTomato	2.96912	0.00456996
RJ01	Juveniles	2.76718	0.00497034		Adults	2.75652	0.00782316		CD02	tdTomato	3.17082	0.00868389		tdTomato	2.97153	0.00451333
RJ01	Juveniles	2.76942	0.00486997		Adults	2.75883	0.00766147		CD02	tdTomato	3.17367	0.00851613		tdTomato	2.97394	0.00445679
RJ01	Juveniles	2.77166	0.00477129		Adults	2.76113	0.00750235		CD02	tdTomato	3.17653	0.00835112		tdTomato	2.97635	0.00440033
RJ01	Juveniles	2.77391	0.00467428		Adults	2.76343	0.00734579		CD02	tdTomato	3.17939	0.00818881		tdTomato	2.97876	0.00434397
RJ01	Juveniles	2.77615	0.00457892		Adults	2.76573	0.00719177		CD02	tdTomato	3.18225	0.00802918		tdTomato	2.98117	0.0042877
RJ01	Juveniles	2.77839	0.00448519		Adults	2.76804	0.00704027		CD02	tdTomato	3.1851	0.0078722		tdTomato	2.98358	0.00423154
RJ01	Juveniles	2.78063	0.00439307		Adults	2.77034	0.00689128		CD02	tdTomato	3.18796	0.00771782		tdTomato	2.98599	0.00417548
RJ01	Juveniles	2.78287	0.00430254		Adults	2.77264	0.00674477		CD02	tdTomato	3.19082	0.00756602		tdTomato	2.98839	0.00411955
RJ01	Juveniles	2.78511	0.00421358		Adults	2.77494	0.00660073		CD02	tdTomato	3.19368	0.00741676		tdTomato	2.9908	0.00406374
RJ01	Juveniles	2.78735	0.00412616		Adults	2.77724	0.00645914		CD02	tdTomato	3.19653	0.00727001		tdTomato	2.99321	0.00400806
RJ01	Juveniles	2.78959	0.00404027		Adults	2.77955	0.00631998		CD02	tdTomato	3.19939	0.00712574		tdTomato	2.99562	0.00395252
RJ01	Juveniles	2.79183	0.0039559		Adults	2.78185	0.00618323		CD02	tdTomato	3.20225	0.00698392		tdTomato	2.99803	0.00389713
RJ01	Juveniles	2.79407	0.00387301		Adults	2.78415	0.00604885		CD02	tdTomato	3.20511	0.00684451		tdTomato	3.00044	0.0038419
RJ01	Juveniles	2.79632	0.00379158		Adults	2.78645	0.00591684		CD02	tdTomato	3.20796	0.00670748		tdTomato	3.00285	0.00378683
RJ01	Juveniles	2.79856	0.00371161		Adults	2.78876	0.00578717		CD02	tdTomato	3.21082	0.0065728		tdTomato	3.00526	0.00373194
RJ01	Juveniles	2.8008	0.00363307		Adults	2.79106	0.0056598		CD02	tdTomato	3.21368	0.00644045		tdTomato	3.00767	0.00367723
RJ01	Juveniles	2.80304	0.00355593		Adults	2.79336	0.00553472		CD02	tdTomato	3.21654	0.00631037		tdTomato	3.01008	0.00362271
RJ01	Juveniles	2.80528	0.00348019		Adults	2.79566	0.0054119		CD02	tdTomato	3.21939	0.00618256		tdTomato	3.01249	0.0035684
RJ01	Juveniles	2.80752	0.00340582		Adults	2.79797	0.00529132		CD02	tdTomato	3.22225	0.00605697		tdTomato	3.0149	0.0035143
RJ01	Juveniles	2.80976	0.0033328		Adults	2.80027	0.00517294		CD02	tdTomato	3.22511	0.00593358		tdTomato	3.01731	0.00346042
RJ01	Juveniles	2.812	0.00326112		Adults	2.80257	0.00505675		CD02	tdTomato	3.22797	0.00581235		tdTomato	3.01971	0.00340677
RJ01	Juveniles	2.81424	0.00319075		Adults	2.80487	0.0049427		CD02	tdTomato	3.23082	0.00569326		tdTomato	3.02212	0.00335337
RJ01	Juveniles	2.81649	0.00312167		Adults	2.80717	0.00483079		CD02	tdTomato	3.23368	0.00557627		tdTomato	3.02453	0.00330022
RJ01	Juveniles	2.81873	0.00305388		Adults	2.80948	0.00472096		CD02	tdTomato	3.23654	0.00546136		tdTomato	3.02694	0.00324733
RJ01	Juveniles	2.82097	0.00298734		Adults	2.81178	0.00461321		CD02	tdTomato	3.2394	0.00534849		tdTomato	3.02935	0.00319471
RJ01	Juveniles	2.82321	0.00292205		Adults	2.81408	0.0045075		CD02	tdTomato	3.24225	0.00523765		tdTomato	3.03176	0.00314238
RJ01	Juveniles	2.82545	0.00285797		Adults	2.81638	0.00440379		CD02	tdTomato	3.24511	0.00512879		tdTomato	3.03417	0.00309034
RJ01	Juveniles	2.82769	0.00279511		Adults	2.81869	0.00430207		CD02	tdTomato	3.24797	0.00502189		tdTomato	3.03658	0.0030386
RJ01	Juveniles	2.82993	0.00273343		Adults	2.82099	0.0042023		CD02	tdTomato	3.25083	0.00491693		tdTomato	3.03899	0.00298718
RJ01	Juveniles	2.83217	0.00267292		Adults	2.82329	0.00410446		CD02	tdTomato	3.25368	0.00481387		tdTomato	3.0414	0.00293608
RJ01	Juveniles	2.83441	0.00261356		Adults	2.82559	0.00400851		CD02	tdTomato	3.25654	0.00471269		tdTomato	3.04381	0.00288531
RJ01	Juveniles	2.83666	0.00255534		Adults	2.8279	0.00391443		CD02	tdTomato	3.2594	0.00461335		tdTomato	3.04622	0.00283489
RJ01	Juveniles	2.8389	0.00249824		Adults	2.8302	0.00382218		CD02	tdTomato	3.26226	0.00451584		tdTomato	3.04863	0.00278482
RJ01	Juveniles	2.84114	0.00244224		Adults	2.8325	0.00373175		CD02	tdTomato	3.26511	0.00442012		tdTomato	3.05104	0.00273511
RJ01	Juveniles	2.84338	0.00238732		Adults	2.8348	0.00364309		CD02	tdTomato	3.26797	0.00432617		tdTomato	3.05344	0.00268577
RJ01	Juveniles	2.84562	0.00233347		Adults	2.8371	0.00355618		CD02	tdTomato	3.27083	0.00423396		tdTomato	3.05585	0.00263682
RJ01	Juveniles	2.84786	0.00228067		Adults	2.83941	0.003471		CD02	tdTomato	3.27369	0.00414347		tdTomato	3.05826	0.00258825
RJ01	Juveniles	2.8501	0.0022289		Adults	2.84171	0.00338751		CD02	tdTomato	3.27654	0.00405466		tdTomato	3.06067	0.00254009
RJ01	Juveniles	2.85234	0.00217816		Adults	2.84401	0.00330568		CD02	tdTomato	3.2794	0.00396752		tdTomato	3.06308	0.00249233
RJ01	Juveniles	2.85458	0.00212841		Adults	2.84631	0.00322549		CD02	tdTomato	3.28226	0.00388202		tdTomato	3.06549	0.00244499
RJ01	Juveniles	2.85682	0.00207966		Adults	2.84862	0.00314692		CD02	tdTomato	3.28512	0.00379813		tdTomato	3.0679	0.00239808
RJ01	Juveniles	2.85907	0.00203187		Adults	2.85092	0.00306993		CD02	tdTomato	3.28797	0.00371583		tdTomato	3.07031	0.0023516
RJ01	Juveniles	2.86131	0.00198504		Adults	2.85322	0.00299449		CD02	tdTomato	3.29083	0.0036351		tdTomato	3.07272	0.00230556
RJ01	Juveniles	2.86355	0.00193915		Adults	2.85552	0.00292058		CD02	tdTomato	3.29369	0.0035559		tdTomato	3.07513	0.00225997
RJ01	Juveniles	2.86579	0.00189418		Adults	2.85783	0.00284818		CD02	tdTomato	3.29655	0.00347822		tdTomato	3.07754	0.00221484
RJ01	Juveniles	2.86803	0.00185012		Adults	2.86013	0.00277726		CD02	tdTomato	3.2994	0.00340203		tdTomato	3.07995	0.00217017
RJ01	Juveniles	2.87027	0.00180696		Adults	2.86243	0.00270778		CD02	tdTomato	3.30226	0.0033273		tdTomato	3.08236	0.00212597
RJ01	Juveniles	2.87251	0.00176467		Adults	2.86473	0.00263974		CD02	tdTomato	3.30512	0.00325403		tdTomato	3.08476	0.00208224
RJ01	Juveniles	2.87475	0.00172325		Adults	2.86703	0.00257309		CD02	tdTomato	3.30798	0.00318217		tdTomato	3.08717	0.002039
RJ01	Juveniles	2.87699	0.00168268		Adults	2.86934	0.00250782		CD02	tdTomato	3.31083	0.00311171		tdTomato	3.08958	0.00199625
RJ01	Juveniles	2.87924	0.00164295		Adults	2.87164	0.0024439		CD02	tdTomato	3.31369	0.00304262		tdTomato	3.09199	0.001954
RJ01	Juveniles	2.88148	0.00160404		Adults	2.87394	0.00238132		CD02	tdTomato	3.31655	0.00297489		tdTomato	3.0944	0.00191224
RJ01	Juveniles	2.88372	0.00156594		Adults	2.87624	0.00232003		CD02	tdTomato	3.31941	0.00290849		tdTomato	3.09681	0.00187099
RJ01	Juveniles	2.88596	0.00152863		Adults	2.87855	0.00226003		CD02	tdTomato	3.32227	0.0028434		tdTomato	3.09922	0.00183025
RJ01	Juveniles	2.8882	0.0014921		Adults	2.88085	0.00220129		CD02	tdTomato	3.32512	0.0027796		tdTomato	3.10163	0.00179002
RJ01	Juveniles	2.89044	0.00145634		Adults	2.88315	0.00214379		CD02	tdTomato	3.32798	0.00271707		tdTomato	3.10404	0.00175032
RJ01	Juveniles	2.89268	0.00142133		Adults	2.88545	0.0020875		CD02	tdTomato	3.33084	0.00265578		tdTomato	3.10645	0.00171114
RJ01	Juveniles	2.89492	0.00138707		Adults	2.88776	0.00203241		CD02	tdTomato	3.3337	0.00259572		tdTomato	3.10886	0.00167248
RJ01	Juveniles	2.89716	0.00135353		Adults	2.89006	0.00197849		CD02	tdTomato	3.33655	0.00253686		tdTomato	3.11127	0.00163435
RJ01	Juveniles	2.8994	0.0013207		Adults	2.89236	0.00192572		CD02	tdTomato	3.33941	0.00247918		tdTomato	3.11368	0.00159676
RJ01	Juveniles	2.90165	0.00128858		Adults	2.89466	0.00187409		CD02	tdTomato	3.34227	0.00242267		tdTomato	3.11609	0.0015597
RJ01	Juveniles	2.90389	0.00125715		Adults	2.89696	0.00182356		CD02	tdTomato	3.34513	0.0023673		tdTomato	3.11849	0.00152317
RJ01	Juveniles	2.90613	0.0012264		Adults	2.89927	0.00177413		CD02	tdTomato	3.34798	0.00231306		tdTomato	3.1209	0.00148719
RJ01	Juveniles	2.90837	0.00119631		Adults	2.90157	0.00172577		CD02	tdTomato	3.35084	0.00225992		tdTomato	3.12331	0.00145175
RJ01	Juveniles	2.91061	0.00116687		Adults	2.90387	0.00167847		CD02	tdTomato	3.3537	0.00220787		tdTomato	3.12572	0.00141685
RJ01	Juveniles	2.91285	0.00113808		Adults	2.90617	0.0016322		CD02	tdTomato	3.35656	0.00215689		tdTomato	3.12813	0.00138249
RJ01	Juveniles	2.91509	0.00110992		Adults	2.90848	0.00158696		CD02	tdTomato	3.35941	0.00210695		tdTomato	3.13054	0.00134868
RJ01	Juveniles	2.91733	0.00108237		Adults	2.91078	0.00154271		CD02	tdTomato	3.36227	0.00205805		tdTomato	3.13295	0.00131541
RJ01	Juveniles	2.91957	0.00105543		Adults	2.91308	0.00149944		CD02	tdTomato	3.36513	0.00201016		tdTomato	3.13536	0.00128269
RJ01	Juveniles	2.92182	0.00102908		Adults	2.91538	0.00145714		CD02	tdTomato	3.36799	0.00196326		tdTomato	3.13777	0.00125051
RJ01	Juveniles	2.92406	0.00100332		Adults	2.91769	0.00141579		CD02	tdTomato	3.37084	0.00191735		tdTomato	3.14018	0.00121887
RJ01	Juveniles	2.9263	0.000978136		Adults	2.91999	0.00137537		CD02	tdTomato	3.3737	0.00187239		tdTomato	3.14259	0.00118778
RJ01	Juveniles	2.92854	0.000953512		Adults	2.92229	0.00133587		CD02	tdTomato	3.37656	0.00182837		tdTomato	3.145	0.00115723
RJ01	Juveniles	2.93078	0.000929439		Adults	2.92459	0.00129727		CD02	tdTomato	3.37942	0.00178528		tdTomato	3.14741	0.00112722
RJ01	Juveniles	2.93302	0.000905908		Adults	2.92689	0.00125956		CD02	tdTomato	3.38227	0.0017431		tdTomato	3.14981	0.00109775
RJ01	Juveniles	2.93526	0.000882908		Adults	2.9292	0.00122271		CD02	tdTomato	3.38513	0.00170181		tdTomato	3.15222	0.00106882
RJ01	Juveniles	2.9375	0.000860429		Adults	2.9315	0.00118672		CD02	tdTomato	3.38799	0.0016614		tdTomato	3.15463	0.00104043
RJ01	Juveniles	2.93974	0.00083846		Adults	2.9338	0.00115156		CD02	tdTomato	3.39085	0.00162185		tdTomato	3.15704	0.00101257
RJ01	Juveniles	2.94199	0.000816993		Adults	2.9361	0.00111724		CD02	tdTomato	3.3937	0.00158315		tdTomato	3.15945	0.000985234
RJ01	Juveniles	2.94423	0.000796017		Adults	2.93841	0.00108372		CD02	tdTomato	3.39656	0.00154527		tdTomato	3.16186	0.00095843
RJ01	Juveniles	2.94647	0.000775522		Adults	2.94071	0.001051		CD02	tdTomato	3.39942	0.00150821		tdTomato	3.16427	0.00093215
RJ01	Juveniles	2.94871	0.0007555		Adults	2.94301	0.00101906		CD02	tdTomato	3.40228	0.00147195		tdTomato	3.16668	0.000906393
RJ01	Juveniles	2.95095	0.000735941		Adults	2.94531	0.000987898		CD02	tdTomato	3.40513	0.00143647		tdTomato	3.16909	0.000881153
RJ01	Juveniles	2.95319	0.000716835		Adults	2.94762	0.000957486		CD02	tdTomato	3.40799	0.00140176		tdTomato	3.1715	0.000856427
RJ01	Juveniles	2.95543	0.000698175		Adults	2.94992	0.000927817		CD02	tdTomato	3.41085	0.00136781		tdTomato	3.17391	0.000832211
RJ01	Juveniles	2.95767	0.00067995		Adults	2.95222	0.000898878		CD02	tdTomato	3.41371	0.00133459		tdTomato	3.17632	0.000808502
RJ01	Juveniles	2.95991	0.000662152		Adults	2.95452	0.000870656		CD02	tdTomato	3.41656	0.00130211		tdTomato	3.17873	0.000785295
RJ01	Juveniles	2.96215	0.000644772		Adults	2.95682	0.000843137		CD02	tdTomato	3.41942	0.00127034		tdTomato	3.18114	0.000762585
RJ01	Juveniles	2.9644	0.000627803		Adults	2.95913	0.00081631		CD02	tdTomato	3.42228	0.00123926		tdTomato	3.18354	0.000740368
RJ01	Juveniles	2.96664	0.000611235		Adults	2.96143	0.000790162		CD02	tdTomato	3.42514	0.00120888		tdTomato	3.18595	0.000718638
RJ01	Juveniles	2.96888	0.000595061		Adults	2.96373	0.000764681		CD02	tdTomato	3.42799	0.00117916		tdTomato	3.18836	0.000697392
RJ01	Juveniles	2.97112	0.000579272		Adults	2.96603	0.000739855		CD02	tdTomato	3.43085	0.00115011		tdTomato	3.19077	0.000676623
RJ01	Juveniles	2.97336	0.000563861		Adults	2.96834	0.000715672		CD02	tdTomato	3.43371	0.0011217		tdTomato	3.19318	0.000656327
RJ01	Juveniles	2.9756	0.000548819		Adults	2.97064	0.00069212		CD02	tdTomato	3.43657	0.00109393		tdTomato	3.19559	0.000636498
RJ01	Juveniles	2.97784	0.000534139		Adults	2.97294	0.000669188		CD02	tdTomato	3.43942	0.00106678		tdTomato	3.198	0.000617131
RJ01	Juveniles	2.98008	0.000519814		Adults	2.97524	0.000646864		CD02	tdTomato	3.44228	0.00104025		tdTomato	3.20041	0.000598219
RJ01	Juveniles	2.98232	0.000505836		Adults	2.97755	0.000625137		CD02	tdTomato	3.44514	0.00101431		tdTomato	3.20282	0.000579758
RJ01	Juveniles	2.98457	0.000492197		Adults	2.97985	0.000603995		CD02	tdTomato	3.448	0.000988954		tdTomato	3.20523	0.00056174
RJ01	Juveniles	2.98681	0.000478891		Adults	2.98215	0.000583428		CD02	tdTomato	3.45085	0.000964176		tdTomato	3.20764	0.000544161
RJ01	Juveniles	2.98905	0.000465911		Adults	2.98445	0.000563424		CD02	tdTomato	3.45371	0.000939961		tdTomato	3.21005	0.000527014
RJ01	Juveniles	2.99129	0.000453249		Adults	2.98675	0.000543972		CD02	tdTomato	3.45657	0.000916299		tdTomato	3.21246	0.000510294
RJ01	Juveniles	2.99353	0.000440899		Adults	2.98906	0.000525063		CD02	tdTomato	3.45943	0.000893178		tdTomato	3.21486	0.000493993
RJ01	Juveniles	2.99577	0.000428853		Adults	2.99136	0.000506684		CD02	tdTomato	3.46228	0.000870587		tdTomato	3.21727	0.000478105
RJ01	Juveniles	2.99801	0.000417107		Adults	2.99366	0.000488826		CD02	tdTomato	3.46514	0.000848517		tdTomato	3.21968	0.000462625
RJ01	Juveniles	3.00025	0.000405652		Adults	2.99596	0.000471478		CD02	tdTomato	3.468	0.000826955		tdTomato	3.22209	0.000447545
RJ01	Juveniles	3.00249	0.000394483		Adults	2.99827	0.00045463		CD02	tdTomato	3.47086	0.000805893		tdTomato	3.2245	0.00043286
RJ01	Juveniles	3.00473	0.000383594		Adults	3.00057	0.000438271		CD02	tdTomato	3.47371	0.000785319		tdTomato	3.22691	0.000418562
RJ01	Juveniles	3.00698	0.000372978		Adults	3.00287	0.000422392		CD02	tdTomato	3.47657	0.000765224		tdTomato	3.22932	0.000404645
RJ01	Juveniles	3.00922	0.000362629		Adults	3.00517	0.000406982		CD02	tdTomato	3.47943	0.000745598		tdTomato	3.23173	0.000391103
RJ01	Juveniles	3.01146	0.000352542		Adults	3.00748	0.000392031		CD02	tdTomato	3.48229	0.000726431		tdTomato	3.23414	0.00037793
RJ01	Juveniles	3.0137	0.00034271		Adults	3.00978	0.00037753		CD02	tdTomato	3.48514	0.000707714		tdTomato	3.23655	0.000365117
RJ01	Juveniles	3.01594	0.000333128		Adults	3.01208	0.000363469		CD02	tdTomato	3.488	0.000689438		tdTomato	3.23896	0.00035266
RJ01	Juveniles	3.01818	0.000323791		Adults	3.01438	0.000349838		CD02	tdTomato	3.49086	0.000671593		tdTomato	3.24137	0.00034055
RJ01	Juveniles	3.02042	0.000314692		Adults	3.01669	0.000336628		CD02	tdTomato	3.49372	0.000654171		tdTomato	3.24378	0.000328782
RJ01	Juveniles	3.02266	0.000305827		Adults	3.01899	0.000323828		CD02	tdTomato	3.49657	0.000637162		tdTomato	3.24619	0.00031735
RJ01	Juveniles	3.0249	0.000297191		Adults	3.02129	0.000311431		CD02	tdTomato	3.49943	0.000620558		tdTomato	3.24859	0.000306245
RJ01	Juveniles	3.02715	0.000288777		Adults	3.02359	0.000299426		CD02	tdTomato	3.50229	0.00060435		tdTomato	3.251	0.000295462
RJ01	Juveniles	3.02939	0.000280582		Adults	3.02589	0.000287805		CD02	tdTomato	3.50515	0.000588531		tdTomato	3.25341	0.000284995
RJ01	Juveniles	3.03163	0.0002726		Adults	3.0282	0.000276558		CD02	tdTomato	3.508	0.000573091		tdTomato	3.25582	0.000274836
RJ01	Juveniles	3.03387	0.000264825		Adults	3.0305	0.000265677		CD02	tdTomato	3.51086	0.000558022		tdTomato	3.25823	0.000264979
RJ01	Juveniles	3.03611	0.000257255		Adults	3.0328	0.000255153		CD02	tdTomato	3.51372	0.000543318		tdTomato	3.26064	0.000255418
RJ01	Juveniles	3.03835	0.000249882		Adults	3.0351	0.000244977		CD02	tdTomato	3.51658	0.000528969		tdTomato	3.26305	0.000246146
RJ01	Juveniles	3.04059	0.000242704		Adults	3.03741	0.00023514		CD02	tdTomato	3.51943	0.000514969		tdTomato	3.26546	0.000237157
RJ01	Juveniles	3.04283	0.000235716		Adults	3.03971	0.000225634		CD02	tdTomato	3.52229	0.00050131		tdTomato	3.26787	0.000228444
RJ01	Juveniles	3.04507	0.000228913		Adults	3.04201	0.00021645		CD02	tdTomato	3.52515	0.000487984		tdTomato	3.27028	0.000220001
RJ01	Juveniles	3.04732	0.000222291		Adults	3.04431	0.000207581		CD02	tdTomato	3.52801	0.000474984		tdTomato	3.27269	0.000211823
RJ01	Juveniles	3.04956	0.000215845		Adults	3.04662	0.000199018		CD02	tdTomato	3.53086	0.000462304		tdTomato	3.2751	0.000203902
RJ01	Juveniles	3.0518	0.000209572		Adults	3.04892	0.000190754		CD02	tdTomato	3.53372	0.000449935		tdTomato	3.27751	0.000196233
RJ01	Juveniles	3.05404	0.000203467		Adults	3.05122	0.000182779		CD02	tdTomato	3.53658	0.000437872		tdTomato	3.27991	0.000188809
RJ01	Juveniles	3.05628	0.000197527		Adults	3.05352	0.000175087		CD02	tdTomato	3.53944	0.000426107		tdTomato	3.28232	0.000181625
RJ01	Juveniles	3.05852	0.000191747		Adults	3.05582	0.000167669		CD02	tdTomato	3.54229	0.000414635		tdTomato	3.28473	0.000174675
RJ01	Juveniles	3.06076	0.000186124		Adults	3.05813	0.000160519		CD02	tdTomato	3.54515	0.000403448		tdTomato	3.28714	0.000167952
RJ01	Juveniles	3.063	0.000180654		Adults	3.06043	0.000153628		CD02	tdTomato	3.54801	0.00039254		tdTomato	3.28955	0.000161452
RJ01	Juveniles	3.06524	0.000175334		Adults	3.06273	0.00014699		CD02	tdTomato	3.55087	0.000381906		tdTomato	3.29196	0.000155168
RJ01	Juveniles	3.06748	0.000170159		Adults	3.06503	0.000140597		CD02	tdTomato	3.55373	0.000371538		tdTomato	3.29437	0.000149094
RJ01	Juveniles	3.06973	0.000165126		Adults	3.06734	0.000134442		CD02	tdTomato	3.55658	0.000361432		tdTomato	3.29678	0.000143226
RJ01	Juveniles	3.07197	0.000160232		Adults	3.06964	0.000128517		CD02	tdTomato	3.55944	0.00035158		tdTomato	3.29919	0.000137557
RJ01	Juveniles	3.07421	0.000155473		Adults	3.07194	0.000122817		CD02	tdTomato	3.5623	0.000341978		tdTomato	3.3016	0.000132083
RJ01	Juveniles	3.07645	0.000150847		Adults	3.07424	0.000117335		CD02	tdTomato	3.56516	0.00033262		tdTomato	3.30401	0.000126798
RJ01	Juveniles	3.07869	0.000146349		Adults	3.07655	0.000112064		CD02	tdTomato	3.56801	0.0003235		tdTomato	3.30642	0.000121696
RJ01	Juveniles	3.08093	0.000141977		Adults	3.07885	0.000106997		CD02	tdTomato	3.57087	0.000314613		tdTomato	3.30883	0.000116773
RJ01	Juveniles	3.08317	0.000137728		Adults	3.08115	0.000102128		CD02	tdTomato	3.57373	0.000305953		tdTomato	3.31124	0.000112024
RJ01	Juveniles	3.08541	0.000133599		Adults	3.08345	9.74509e-05		CD02	tdTomato	3.57659	0.000297516		tdTomato	3.31364	0.000107444
RJ01	Juveniles	3.08765	0.000129586		Adults	3.08575	9.29597e-05		CD02	tdTomato	3.57944	0.000289296		tdTomato	3.31605	0.000103027
RJ01	Juveniles	3.0899	0.000125687		Adults	3.08806	8.86485e-05		CD02	tdTomato	3.5823	0.000281289		tdTomato	3.31846	9.87699e-05
RJ01	Juveniles	3.09214	0.000121899		Adults	3.09036	8.45112e-05		CD02	tdTomato	3.58516	0.000273489		tdTomato	3.32087	9.46669e-05
RJ01	Juveniles	3.09438	0.00011822		Adults	3.09266	8.05423e-05		CD02	tdTomato	3.58802	0.000265892		tdTomato	3.32328	9.07138e-05
RJ01	Juveniles	3.09662	0.000114646		Adults	3.09496	7.67362e-05		CD02	tdTomato	3.59087	0.000258493		tdTomato	3.32569	8.6906e-05
RJ01	Juveniles	3.09886	0.000111175		Adults	3.09727	7.30873e-05		CD02	tdTomato	3.59373	0.000251287		tdTomato	3.3281	8.32392e-05
RJ01	Juveniles	3.1011	0.000107805		Adults	3.09957	6.95905e-05		CD02	tdTomato	3.59659	0.00024427		tdTomato	3.33051	7.97091e-05
RJ01	Juveniles	3.10334	0.000104532		Adults	3.10187	6.62404e-05		CD02	tdTomato	3.59945	0.000237437		tdTomato	3.33292	7.63115e-05
RJ01	Juveniles	3.10558	0.000101355		Adults	3.10417	6.30319e-05		CD02	tdTomato	3.6023	0.000230785		tdTomato	3.33533	7.30421e-05
RJ01	Juveniles	3.10782	9.82713e-05		Adults	3.10648	5.99602e-05		CD02	tdTomato	3.60516	0.000224309		tdTomato	3.33774	6.98971e-05
RJ01	Juveniles	3.11007	9.52782e-05		Adults	3.10878	5.70205e-05		CD02	tdTomato	3.60802	0.000218005		tdTomato	3.34015	6.68724e-05
RJ01	Juveniles	3.11231	9.23737e-05		Adults	3.11108	5.42079e-05		CD02	tdTomato	3.61088	0.000211869		tdTomato	3.34256	6.39643e-05
RJ01	Juveniles	3.11455	8.95555e-05		Adults	3.11338	5.15179e-05		CD02	tdTomato	3.61373	0.000205897		tdTomato	3.34496	6.11689e-05
RJ01	Juveniles	3.11679	8.68214e-05		Adults	3.11568	4.89461e-05		CD02	tdTomato	3.61659	0.000200085		tdTomato	3.34737	5.84825e-05
RJ01	Juveniles	3.11903	8.41694e-05		Adults	3.11799	4.64881e-05		CD02	tdTomato	3.61945	0.000194429		tdTomato	3.34978	5.59017e-05
RJ01	Juveniles	3.12127	8.15974e-05		Adults	3.12029	4.41396e-05		CD02	tdTomato	3.62231	0.000188925		tdTomato	3.35219	5.34229e-05
RJ01	Juveniles	3.12351	7.91033e-05		Adults	3.12259	4.18967e-05		CD02	tdTomato	3.62516	0.000183571		tdTomato	3.3546	5.10426e-05
RJ01	Juveniles	3.12575	7.66853e-05		Adults	3.12489	3.97551e-05		CD02	tdTomato	3.62802	0.000178362		tdTomato	3.35701	4.87577e-05
RJ01	Juveniles	3.12799	7.43414e-05		Adults	3.1272	3.77112e-05		CD02	tdTomato	3.63088	0.000173296		tdTomato	3.35942	4.65648e-05
RJ01	Juveniles	3.13023	7.20698e-05		Adults	3.1295	3.57611e-05		CD02	tdTomato	3.63374	0.000168367		tdTomato	3.36183	4.44609e-05
RJ01	Juveniles	3.13248	6.98686e-05		Adults	3.1318	3.39012e-05		CD02	tdTomato	3.63659	0.000163575		tdTomato	3.36424	4.24427e-05
RJ01	Juveniles	3.13472	6.77362e-05		Adults	3.1341	3.21279e-05		CD02	tdTomato	3.63945	0.000158914		tdTomato	3.36665	4.05075e-05
RJ01	Juveniles	3.13696	6.56708e-05		Adults	3.13641	3.04377e-05		CD02	tdTomato	3.64231	0.000154382		tdTomato	3.36906	3.86522e-05
RJ01	Juveniles	3.1392	6.36707e-05		Adults	3.13871	2.88274e-05		CD02	tdTomato	3.64517	0.000149976		tdTomato	3.37147	3.68741e-05
RJ01	Juveniles	3.14144	6.17343e-05		Adults	3.14101	2.72937e-05		CD02	tdTomato	3.64802	0.000145693		tdTomato	3.37388	3.51704e-05
RJ01	Juveniles	3.14368	5.98601e-05		Adults	3.14331	2.58335e-05		CD02	tdTomato	3.65088	0.00014153		tdTomato	3.37629	3.35385e-05
RJ01	Juveniles	3.14592	5.80465e-05		Adults	3.14561	2.44438e-05		CD02	tdTomato	3.65374	0.000137483		tdTomato	3.37869	3.19757e-05
RJ01	Juveniles	3.14816	5.6292e-05		Adults	3.14792	2.31217e-05		CD02	tdTomato	3.6566	0.000133551		tdTomato	3.3811	3.04797e-05
RJ01	Juveniles	3.1504	5.45952e-05		Adults	3.15022	2.18642e-05		CD02	tdTomato	3.65945	0.000129731		tdTomato	3.38351	2.90479e-05
RJ01	Juveniles	3.15265	5.29547e-05		Adults	3.15252	2.06687e-05		CD02	tdTomato	3.66231	0.000126019		tdTomato	3.38592	2.7678e-05
RJ01	Juveniles	3.15489	5.1369e-05		Adults	3.15482	1.95326e-05		CD02	tdTomato	3.66517	0.000122414		tdTomato	3.38833	2.63677e-05
RJ01	Juveniles	3.15713	4.9837e-05		Adults	3.15713	1.84533e-05		CD02	tdTomato	3.66803	0.000118912		tdTomato	3.39074	2.51148e-05
RJ01	Juveniles	3.15937	4.83573e-05		Adults	3.15943	1.74284e-05		CD02	tdTomato	3.67088	0.000115511		tdTomato	3.39315	2.39172e-05
[truncated: 88,113 more rows]

## Sheet: Fig S3B
Age	TrialBin	Median	CI
Adults	21	1.07416	(0.06982237344509978, 0.16901895873476658)
Adults	41	1.11594	(0.10515948651220675, 0.10038682575240165)
Adults	61	0.99105	(0.04787332319698456, 0.06920560768906925)
Adults	81	0.940469	(0.18150024338439308, 0.1291108329622468)
Adults	101	0.823995	(0.39637603654610404, 0.254492546132993)
Adults	121	1.07551	(0.3890106760684434, 0.7492625994207294)
Adults	141	0.758363	(0.3472489705679545, 0.34724897056795445)
Juveniles	21	1.05206	(0.0662731875089213, 0.023999432433746692)
Juveniles	41	0.945584	(0.05471488940123237, 0.1736455122705145)
Juveniles	61	0.679338	(0.3550935686124012, 0.32641420373080077)
Juveniles	81	0.397474	(0.10102797689112092, 0.9869513324560544)
Juveniles	101	0.528185	(0.19583487582878495, 0.4582288444249448)
Juveniles	121	0.515511	(0.4857297871548581, 0.48572978715485815)
Juveniles	141	0.805017	(0.3408322140987212, 0.3408322140987212)

## Sheet: Fig S3C
Sex	PokeTime	Median	CI		variable	coef	CI
F	-0.995679	0	(0.0, 0.0)		Intercept	-1.07671	(0.2048955268390864, 0.22713167578866988)
F	-0.945679	0	(0.0, 0.0)		Age: Juveniles	0.321005	(0.07672554069254423, 0.07330701282026159)
F	-0.895679	0	(0.0, 0.0)		Trial	0.204265	(0.13667107286806007, 0.11997000904035202)
F	-0.845679	0	(0.0, 0.0)		Poke-time	0.299306	(0.2505696230611897, 0.2960163498576352)
F	-0.795679	0	(0.0, 0.0)		Trial & Age: Juveniles	0.0151365	(0.2591903314500254, 0.2784597526984439)
F	-0.745679	0	(0.0, 0.012317055499203013)		Poke-time & Age: Juveniles	0.243852	(0.3252048426685914, 0.4358099733524633)
F	-0.695679	0	(0.0, 0.01546268656716418)
F	-0.645679	0	(0.0, 0.018638297872340427)
F	-0.595679	0	(0.0, 0.018638297872340427)
F	-0.545679	0	(0.0, 0.018638297872340427)
F	-0.495679	0.0123171	(0.012317055499203013, 0.011310851477541174)
F	-0.445679	0.0170781	(0.017078071182548796, 0.00654983579419539)
F	-0.395679	0.0173077	(0.01730769230769231, 0.0063202146690518775)
F	-0.345679	0.0173077	(0.01730769230769231, 0.0063202146690518775)
F	-0.295679	0.0200321	(0.007714995782848268, 0.003595855694692906)
F	-0.245679	0.0208333	(0.007877867746288798, 0.02044326241134752)
F	-0.195679	0.0265533	(0.013597814524028012, 0.015556648966941637)
F	-0.145679	0.0265533	(0.009427010154613912, 0.02597331563360831)
F	-0.0956786	0.0349254	(0.0158760262547928, 0.022634308563284376)
F	-0.0456786	0.0357587	(0.01561700606280339, 0.029493282922258737)
F	0.00432137	0.0400641	(0.010645975806585797, 0.026418656056587095)
F	0.0543214	0.0451153	(0.005051229864662707, 0.025367426191924378)
F	0.104321	0.0707692	(0.028621937069142053, 0.025731026564788775)
F	0.154321	0.0801282	(0.03240093240093239, 0.03756458094144663)
F	0.204321	0.0960833	(0.044767543859649116, 0.046064102564102566)
F	0.254321	0.104083	(0.034042847503373816, 0.07038475177304965)
F	0.304321	0.108083	(0.02957456140350878, 0.09593965517241379)
F	0.354321	0.133767	(0.0316841085271318, 0.08067221331194868)
F	0.404321	0.146932	(0.02609851988899166, 0.10563344528513768)
F	0.454321	0.169317	(0.027085699318105727, 0.0981737623472782)
F	0.504321	0.221769	(0.05934101091689281, 0.05318412743972445)
F	0.554321	0.25	(0.051598837209302306, 0.04295383547379383)
F	0.604321	0.263579	(0.05892778457772335, 0.043833843329253386)
F	0.654321	0.27581	(0.05119731349841511, 0.04722807409848412)
F	0.704321	0.293381	(0.04129770423375079, 0.052912567084078654)
F	0.754321	0.338634	(0.06141777544780569, 0.023784786062137075)
F	0.804321	0.342088	(0.05671954890318326, 0.05871165264720435)
F	0.854321	0.366489	(0.0508190718470552, 0.06156296387926774)
F	0.904321	0.383797	(0.04213038734315333, 0.06629622957226955)
F	0.954321	0.434686	(0.05424362223860346, 0.05803264749258996)
F	1.00432	0.479056	(0.06153884426110867, 0.036846391989400984)
F	1.05432	0.488867	(0.02532523090879102, 0.05782850472339296)
F	1.10432	0.534073	(0.06011505550416285, 0.050292195360695846)
F	1.15432	0.557846	(0.05784574468085113, 0.03137420844937977)
F	1.20432	0.604409	(0.08565891472868215, 0.028172857262426132)
F	1.25432	0.632794	(0.09529406808223795, 0.023150347769537616)
F	1.30432	0.646427	(0.08184345327336329, 0.03633288442589555)
F	1.35432	0.692654	(0.10699475843473616, 0.019721948727128957)
F	1.40432	0.692654	(0.06620018479132528, 0.03669551331968557)
F	1.45432	0.724388	(0.07380641074811423, 0.040943858483774354)
F	1.50432	0.731634	(0.046217516241879086, 0.03595992511109425)
F	1.55432	0.744422	(0.025671906693711888, 0.0333024522806471)
F	1.60432	0.779554	(0.05971414728682167, 0.03438804412641627)
F	1.65432	0.791182	(0.0697382050253943, 0.03442058491086608)
F	1.70432	0.792892	(0.03181273606414914, 0.04689329089844896)
F	1.75432	0.830278	(0.04381989907255868, 0.04335360839012803)
F	1.80432	0.838542	(0.036065251572327095, 0.05921952736318403)
F	1.85432	0.852003	(0.018669169795577756, 0.05974311659853848)
F	1.90432	0.863971	(0.02349093707250338, 0.04777503149215545)
F	1.95432	0.880896	(0.02043111013602461, 0.05402573568078073)
F	2.00432	0.91611	(0.04837774665001515, 0.03650163550895735)
F	2.05432	0.929624	(0.050947097333205016, 0.03371192850944882)
F	2.10432	0.944231	(0.0544536374478235, 0.032843857634902385)
F	2.15432	0.944231	(0.04282573047107929, 0.04107211061034299)
F	2.20432	0.955468	(0.032017977898730066, 0.031806565236268125)
F	2.25432	0.95789	(0.01777379185221839, 0.029384084616113082)
F	2.30432	0.967949	(0.022454531902206365, 0.022788124156545186)
F	2.35432	0.98125	(0.02578240969816914, 0.009486842105263182)
F	2.40432	0.981891	(0.02642343533919478, 0.014108974358974402)
F	2.45432	0.996	(0.04053240969816918, 0.0040000000000000036)
F	2.50432	1	(0.03690159574468077, 0.0)
F	2.55432	1	(0.025276595744680774, 0.0)
F	2.60432	1	(0.0, 0.0)
F	2.65432	1	(0.0, 0.0)
F	2.70432	1	(0.0, 0.0)
F	2.75432	1	(0.0, 0.0)
F	2.80432	1	(0.0, 0.0)
F	2.85432	1	(0.0, 0.0)
F	2.90432	1	(0.0, 0.0)
F	2.95432	1	(0.0, 0.0)
M	-0.995679	0	(0.0, 0.0)
M	-0.945679	0	(0.0, 0.0)
M	-0.895679	0	(0.0, 0.0)
M	-0.845679	0	(0.0, 0.0)
M	-0.795679	0	(0.0, 0.009433962264150943)
M	-0.745679	0	(0.0, 0.009433962264150943)
M	-0.695679	0	(0.0, 0.01020408163265306)
M	-0.645679	0	(0.0, 0.01020408163265306)
M	-0.595679	0	(0.0, 0.014184397163120567)
M	-0.545679	0.00403226	(0.004032258064516129, 0.01724433768016472)
M	-0.495679	0.00981902	(0.009819021948402002, 0.011457573796278849)
M	-0.445679	0.010916	(0.010915994304698622, 0.014084005695301379)
M	-0.395679	0.0130603	(0.013060330299966297, 0.016351434405916056)
M	-0.345679	0.0142885	(0.014288529759558534, 0.015123234946323819)
M	-0.295679	0.0150535	(0.015053523639607493, 0.025335946248600222)
M	-0.245679	0.0238095	(0.011614401858304296, 0.015664160401002505)
M	-0.195679	0.0306218	(0.013672633338880042, 0.02820174353051178)
M	-0.145679	0.0442177	(0.02534976254652804, 0.0272108843537415)
M	-0.0956786	0.0455487	(0.017246767451853585, 0.03339871417674621)
M	-0.0456786	0.0623706	(0.03229541244415386, 0.03286749482401656)
M	0.00432137	0.0648668	(0.019753978213415735, 0.035133239831697055)
M	0.0543214	0.0963995	(0.0351750456280073, 0.022021517207653274)
M	0.104321	0.12404	(0.05882254725171976, 0.023018884973344186)
M	0.154321	0.130306	(0.04334908097733814, 0.036361063950198086)
M	0.204321	0.15113	(0.05902468034493012, 0.03514456630109672)
M	0.254321	0.174457	(0.02811505832449629, 0.05103367433930095)
M	0.304321	0.217637	(0.04416755648464252, 0.04426781766501736)
M	0.354321	0.225362	(0.03024036762106752, 0.07855924978687123)
M	0.404321	0.263768	(0.06376811594202897, 0.06956521739130433)
M	0.454321	0.266667	(0.06666666666666665, 0.09047619047619049)
M	0.504321	0.279074	(0.05814364513715914, 0.10187850325708225)
M	0.554321	0.3	(0.044186046511627886, 0.08461538461538465)
M	0.604321	0.302439	(0.03499716392512764, 0.10781738586616635)
M	0.654321	0.339323	(0.0718808251308613, 0.09657475030145835)
M	0.704321	0.351449	(0.05144927536231886, 0.08444816053511706)
M	0.754321	0.364028	(0.03749727946962217, 0.09938674243182138)
M	0.804321	0.417116	(0.08378256963162628, 0.05849385313260136)
M	0.854321	0.439647	(0.07298016448959849, 0.0725482907949544)
M	0.904321	0.445568	(0.012234580384226479, 0.07882233018487922)
M	0.954321	0.476467	(0.02646733111849392, 0.07231315668638416)
M	1.00432	0.509434	(0.031173092698933536, 0.06373676944316609)
M	1.05432	0.540476	(0.040476190476190554, 0.044889663182345996)
M	1.10432	0.557143	(0.023308270676691722, 0.04489795918367345)
M	1.15432	0.585119	(0.019901656314699756, 0.04695642407906564)
M	1.20432	0.607143	(0.02759740259740262, 0.08153638814016162)
M	1.25432	0.641768	(0.03307264050901382, 0.07521283939254475)
M	1.30432	0.668699	(0.041580542924073316, 0.07598166407195983)
M	1.35432	0.704704	(0.04561292366170411, 0.057200929152148694)
M	1.40432	0.712406	(0.019933554817275656, 0.06954887218045114)
M	1.45432	0.763605	(0.038967761017450475, 0.04771531254011041)
M	1.50432	0.782392	(0.044296788482834915, 0.047395207464480116)
M	1.55432	0.785714	(0.04761904761904756, 0.04407294832826747)
M	1.60432	0.813265	(0.043700088731144726, 0.06173469387755093)
M	1.65432	0.835034	(0.025510204081632626, 0.05858300767115354)
M	1.70432	0.855401	(0.04184137483021311, 0.052494039977993845)
M	1.75432	0.887164	(0.053830227743271175, 0.02773005594467204)
M	1.80432	0.908333	(0.05119047619047623, 0.025877192982456165)
M	1.85432	0.917636	(0.05322887925371167, 0.01853455385122882)
M	1.90432	0.923588	(0.033344137428085285, 0.023780381185521837)
M	1.95432	0.931391	(0.03139097744360908, 0.02513076168682571)
M	2.00432	0.939015	(0.039015338941118194, 0.02176897478437201)
M	2.05432	0.94826	(0.02143121342007348, 0.02112727338928433)
M	2.10432	0.960526	(0.03140117736200965, 0.010061919504643968)
M	2.15432	0.967852	(0.03451892384860922, 0.018989848081215288)
M	2.20432	0.974937	(0.022556390977443663, 0.013434749664859802)
M	2.25432	0.978291	(0.025910364145658282, 0.010080776496645183)
M	2.30432	0.979558	(0.02717682817807976, 0.012377703311935662)
M	2.35432	0.987493	(0.024078531517956026, 0.012506834335702544)
M	2.40432	0.996454	(0.018193031144002503, 0.0035460992907800915)
M	2.45432	1	(0.016949152542372836, 0.0)
M	2.50432	1	(0.016949152542372836, 0.0)
M	2.55432	1	(0.0, 0.0)
M	2.60432	1	(0.0, 0.0)
M	2.65432	1	(0.0, 0.0)
M	2.70432	1	(0.0, 0.0)
M	2.75432	1	(0.0, 0.0)
M	2.80432	1	(0.0, 0.0)
M	2.85432	1	(0.0, 0.0)
M	2.90432	1	(0.0, 0.0)
M	2.95432	1	(0.0, 0.0)
