# Supplementary material for: Maturation of cortical input to dorsal raphe nucleus increases behavioral persistence in mice
Source: eLife. 2024 Mar 13;13:e93485. doi: 10.7554/eLife.93485 (PMC10994666; doi:10.7554/eLife.93485)
Supplement: Figure 2—source data 1. [file elife-93485-fig2-data1.xlsx]

## Sheet: 2C
Age	MouseID	Rewards_over_time
Adults	RJ13	0.0106807
Adults	RJ14	0.0217609
Adults	RJ15	0.0123515
Adults	RJ16	0.0405967
Adults	RJ17	0.0183698
Adults	RJ18	0.0208576
Adults	RJ19	0.0208464
Adults	RJ20	0.0208149
Adults	RJ21	0.0291895
Adults	RJ22	0.0333399
Adults	RJ23	0.0309527
Adults	RJ24	0.0413743
Adults	RJ61	0.0244838
Adults	RJ62	0.0132629
Adults	RJ63	0.0464156
Adults	RJ64	0.0243058
Adults	RJ65	0.0147678
Adults	RJ66	0.0189198
Adults	RJ68	0.022995
Adults	RJ69	0.0146212
Adults	RJ70	0.0141107
Juveniles	RJ01	0.0228904
Juveniles	RJ02	0.0336596
Juveniles	RJ03	0.0833226
Juveniles	RJ04	0.0522051
Juveniles	RJ05	0.0373629
Juveniles	RJ06	0.0120459
Juveniles	RJ07	0.0228463
Juveniles	RJ08	0.0355951
Juveniles	RJ09	0.0239684
Juveniles	RJ10	0.0127358
Juveniles	RJ11	0.0674563
Juveniles	RJ12	0.0355489
Juveniles	RJ49	0.0235231
Juveniles	RJ50	0.0225069
Juveniles	RJ51	0.0213986
Juveniles	RJ52	0.016778
Juveniles	RJ53	0.0110736
Juveniles	RJ54	0.0164015
Juveniles	RJ55	0.0607165
Juveniles	RJ56	0.0217506
Juveniles	RJ57	0.0700565
Juveniles	RJ59	0.0383929
Juveniles	RJ60	0.0170262

## Sheet: 2D
Age	PokeTime	Median	CI
Adults	-0.995679	0	(0.0, 0.0)
Juveniles	-0.995679	0	(0.0, 0.0)
Adults	-0.945679	0	(0.0, 0.0)
Juveniles	-0.945679	0	(0.0, 0.0)
Adults	-0.895679	0	(0.0, 0.0)
Juveniles	-0.895679	0	(0.0, 0.0)
Adults	-0.845679	0	(0.0, 0.0)
Juveniles	-0.845679	0	(0.0, 0.0)
Adults	-0.795679	0	(0.0, 0.008)
Juveniles	-0.795679	0	(0.0, 0.0)
Adults	-0.745679	0	(0.0, 0.009433962264150943)
Juveniles	-0.745679	0	(0.0, 0.01020408163265306)
Adults	-0.695679	0	(0.0, 0.009708737864077669)
Juveniles	-0.695679	0	(0.0, 0.014184397163120567)
Adults	-0.645679	0	(0.0, 0.009708737864077669)
Juveniles	-0.645679	0	(0.0, 0.014925373134328358)
Adults	-0.595679	0	(0.0, 0.009708737864077669)
Juveniles	-0.595679	0	(0.0, 0.02127659574468085)
Adults	-0.545679	0	(0.0, 0.016)
Juveniles	-0.545679	0.00806452	(0.008064516129032258, 0.013212079615648593)
Adults	-0.495679	0.0075188	(0.007518796992481203, 0.009430355549891679)
Juveniles	-0.495679	0.0149254	(0.014925373134328358, 0.008330440819160014)
Adults	-0.445679	0.0075188	(0.007518796992481203, 0.009430355549891679)
Juveniles	-0.445679	0.0192308	(0.009026687598116171, 0.014102564102564101)
Adults	-0.395679	0.0075188	(0.007518796992481203, 0.011349127535820683)
Juveniles	-0.395679	0.0192308	(0.004738015607580826, 0.014102564102564101)
Adults	-0.345679	0.0075188	(0.007518796992481203, 0.011349127535820683)
Juveniles	-0.345679	0.0212766	(0.006351222610352493, 0.012056737588652482)
Adults	-0.295679	0.0116279	(0.011627906976744186, 0.009205426356589146)
Juveniles	-0.295679	0.0212766	(0.006351222610352493, 0.013206162876008804)
Adults	-0.245679	0.0116279	(0.011627906976744186, 0.009205426356589146)
Juveniles	-0.245679	0.0289855	(0.00572969329288844, 0.03484427998766573)
Adults	-0.195679	0.0169492	(0.01694915254237288, 0.02305084745762712)
Juveniles	-0.195679	0.0408163	(0.01183081928423543, 0.023013460703430307)
Adults	-0.145679	0.0188679	(0.018867924528301886, 0.021132075471698115)
Juveniles	-0.145679	0.047619	(0.015360983102918585, 0.023809523809523808)
Adults	-0.0956786	0.0210526	(0.006015037593984963, 0.020614035087719296)
Juveniles	-0.0956786	0.0689655	(0.028149190710767068, 0.01436781609195402)
Adults	-0.0456786	0.0289855	(0.01203635470400393, 0.01901449275362319)
Juveniles	-0.0456786	0.0689655	(0.02641232575201761, 0.03520114942528736)
Adults	0.00432137	0.0377358	(0.00875034181022696, 0.02626415094339623)
Juveniles	0.00432137	0.0689655	(0.009441707717569789, 0.05008210180623973)
Adults	0.0543214	0.0421053	(0.007221542227662178, 0.02989473684210526)
Juveniles	0.0543214	0.097561	(0.03602251407129456, 0.04529616724738675)
Adults	0.104321	0.0526316	(0.011815252416756176, 0.03070175438596491)
Juveniles	0.104321	0.125	(0.035447761194029856, 0.037790697674418616)
Adults	0.154321	0.0676692	(0.02115754502535408, 0.02033082706766917)
Juveniles	0.154321	0.153226	(0.06626928471248247, 0.013440860215053752)
Adults	0.204321	0.0849057	(0.03227408142999007, 0.019261006289308186)
Juveniles	0.204321	0.171053	(0.040617848970251724, 0.035843920145190555)
Adults	0.254321	0.0921053	(0.028947368421052624, 0.036926994906621394)
Juveniles	0.254321	0.2	(0.036734693877551045, 0.03529411764705881)
Adults	0.304321	0.104167	(0.03048245614035089, 0.024865591397849454)
Juveniles	0.304321	0.241379	(0.05845248107653492, 0.023326572008113583)
Adults	0.354321	0.116279	(0.016279069767441853, 0.015796401930671347)
Juveniles	0.354321	0.266667	(0.06258503401360543, 0.02564102564102566)
Adults	0.404321	0.139535	(0.01453488372093023, 0.0208424747696358)
Juveniles	0.404321	0.28125	(0.05736940298507462, 0.07259615384615387)
Adults	0.454321	0.168421	(0.03205741626794259, 0.03157894736842107)
Juveniles	0.454321	0.28125	(0.0275186567164179, 0.07259615384615387)
Adults	0.504321	0.193548	(0.0344574780058651, 0.02738184546136535)
Juveniles	0.504321	0.3	(0.031707317073170704, 0.08095238095238094)
Adults	0.554321	0.216981	(0.029481132075471705, 0.0388328214129004)
Juveniles	0.554321	0.304348	(0.02076573653471775, 0.11103678929765887)
Adults	0.604321	0.231884	(0.0377093006894611, 0.03211594202898552)
Juveniles	0.604321	0.343284	(0.04328358208955224, 0.07210103329506318)
Adults	0.654321	0.24812	(0.032211209842788774, 0.01932155971323657)
Juveniles	0.654321	0.365854	(0.06352807714123654, 0.04953095684803005)
Adults	0.704321	0.273684	(0.04035087719298247, 0.04707050645481625)
Juveniles	0.704321	0.402439	(0.06910569105691061, 0.028330206378986866)
Adults	0.754321	0.293233	(0.0220466420288008, 0.043609022556390986)
Juveniles	0.754321	0.404762	(0.06101190476190477, 0.05865272938443672)
Adults	0.804321	0.329545	(0.04140986132511554, 0.07045454545454549)
Juveniles	0.804321	0.41791	(0.07416044776119401, 0.07439724454649832)
Adults	0.854321	0.352273	(0.03343214756258239, 0.0727272727272727)
Juveniles	0.854321	0.449275	(0.06629663891458526, 0.06291975963237895)
Adults	0.904321	0.409091	(0.05909090909090914, 0.028409090909090884)
Juveniles	0.904321	0.462687	(0.04408191600138839, 0.07678711704634722)
Adults	0.954321	0.447368	(0.06390977443609025, 0.03981106612685559)
Juveniles	0.954321	0.47619	(0.011074197120708729, 0.08959899749373434)
Adults	1.00432	0.486842	(0.05205949656750575, 0.01315789473684209)
Juveniles	1.00432	0.522388	(0.044127190136275085, 0.0697172034564022)
Adults	1.05432	0.5	(0.021739130434782594, 0.023255813953488413)
Juveniles	1.05432	0.566667	(0.07391304347826083, 0.038596491228070184)
Adults	1.10432	0.533835	(0.011107313738892732, 0.009643674403399749)
Juveniles	1.10432	0.586207	(0.038587848932676416, 0.04537205081669693)
Adults	1.15432	0.5625	(0.0201271186440678, 0.008928571428571397)
Juveniles	1.15432	0.6	(0.033333333333333326, 0.06666666666666665)
Adults	1.20432	0.593023	(0.030523255813953543, 0.01567239635995954)
Juveniles	1.20432	0.632653	(0.0374149659863946, 0.04427001569858713)
Adults	1.25432	0.618421	(0.013769889840881344, 0.027412280701754388)
Juveniles	1.25432	0.656716	(0.0376687988628287, 0.04916593503072875)
Adults	1.30432	0.644737	(0.03604118993135008, 0.04914070891514499)
Juveniles	1.30432	0.670732	(0.04282473057288716, 0.03696060037523452)
Adults	1.35432	0.684211	(0.04014272970562005, 0.050483351235230955)
Juveniles	1.35432	0.705882	(0.053708439897698246, 0.02881152460984393)
Adults	1.40432	0.695652	(0.03463522476050107, 0.07985803016858917)
Juveniles	1.40432	0.716418	(0.026762738033968003, 0.04548685145700071)
Adults	1.45432	0.75	(0.07203389830508478, 0.04591836734693877)
Juveniles	1.45432	0.743902	(0.019764507989907476, 0.022055007784120395)
Adults	1.50432	0.75	(0.05508474576271183, 0.08673469387755106)
Juveniles	1.50432	0.765957	(0.04181951577402787, 0.010161956176564013)
Adults	1.55432	0.770833	(0.05208333333333337, 0.07610544217687076)
Juveniles	1.55432	0.765957	(0.04502721425037115, 0.019756838905775065)
Adults	1.60432	0.8125	(0.07336956521739135, 0.0625)
Juveniles	1.60432	0.785714	(0.04761904761904756, 0.029670329670329676)
Adults	1.65432	0.84375	(0.09375, 0.06534090909090906)
Juveniles	1.65432	0.809524	(0.023809523809523836, 0.023809523809523836)
Adults	1.70432	0.855072	(0.06340579710144933, 0.06538208168642945)
Juveniles	1.70432	0.829787	(0.039089559623948555, 0.010792476102374327)
Adults	1.75432	0.898551	(0.06521739130434778, 0.04262574595055413)
Juveniles	1.75432	0.833333	(0.03921568627450989, 0.03623188405797095)
Adults	1.80432	0.913043	(0.07971014492753614, 0.037936913895993185)
Juveniles	1.80432	0.857143	(0.04318936877076407, 0.04140786749482406)
Adults	1.85432	0.916667	(0.08333333333333326, 0.044117647058823595)
Juveniles	1.85432	0.890244	(0.039180072651790354, 0.02279957582184511)
Adults	1.90432	0.916667	(0.06761006289308169, 0.05272108843537415)
Juveniles	1.90432	0.9	(0.04893617021276597, 0.01304347826086949)
Adults	1.95432	0.94186	(0.06686046511627908, 0.0370869033047736)
Juveniles	1.95432	0.902439	(0.041973908111174185, 0.026132404181184676)
Adults	2.00432	0.942029	(0.06702898550724634, 0.036918382913806336)
Juveniles	2.00432	0.926829	(0.05182926829268297, 0.020539152759948553)
Adults	2.05432	0.95	(0.04999999999999993, 0.03400000000000003)
Juveniles	2.05432	0.928571	(0.04621848739495804, 0.03195488721804507)
Adults	2.10432	0.962264	(0.05903834449178336, 0.02269825507164136)
Juveniles	2.10432	0.938462	(0.03369963369963369, 0.024953095684802973)
Adults	2.15432	0.973684	(0.05701754385964919, 0.018315789473684174)
Juveniles	2.15432	0.952381	(0.023809523809523725, 0.01776830135039098)
Adults	2.20432	0.981132	(0.031132075471698162, 0.010867924528301875)
Juveniles	2.20432	0.953488	(0.020155038759689936, 0.02270210409745288)
Adults	2.25432	0.983051	(0.03305084745762721, 0.008949152542372829)
Juveniles	2.25432	0.957447	(0.005065856129686019, 0.018743667679837817)
Adults	2.30432	0.986842	(0.028508771929824483, 0.005639097744360888)
Juveniles	2.30432	0.963415	(0.011033681765389103, 0.0157520325203252)
Adults	2.35432	0.992	(0.012833333333333363, 0.008000000000000007)
Juveniles	2.35432	0.97619	(0.02270210409745288, 0.008884150675195435)
Adults	2.40432	1	(0.016949152542372836, 0.0)
Juveniles	2.40432	0.979167	(0.025678294573643345, 0.008928571428571508)
Adults	2.45432	1	(0.016949152542372836, 0.0)
Juveniles	2.45432	1	(0.033333333333333326, 0.0)
Adults	2.50432	1	(0.016949152542372836, 0.0)
Juveniles	2.50432	1	(0.03125, 0.0)
Adults	2.55432	1	(0.0, 0.0)
Juveniles	2.55432	1	(0.023809523809523836, 0.0)
Adults	2.60432	1	(0.0, 0.0)
Juveniles	2.60432	1	(0.023255813953488413, 0.0)
Adults	2.65432	1	(0.0, 0.0)
Juveniles	2.65432	1	(0.0, 0.0)
Adults	2.70432	1	(0.0, 0.0)
Juveniles	2.70432	1	(0.0, 0.0)
Adults	2.75432	1	(0.0, 0.0)
Juveniles	2.75432	1	(0.0, 0.0)
Adults	2.80432	1	(0.0, 0.0)
Juveniles	2.80432	1	(0.0, 0.0)
Adults	2.85432	1	(0.0, 0.0)
Juveniles	2.85432	1	(0.0, 0.0)
Adults	2.90432	1	(0.0, 0.0)
Juveniles	2.90432	1	(0.0, 0.0)
Adults	2.95432	1	(0.0, 0.0)
Juveniles	2.95432	1	(0.0, 0.0)

## Sheet: 2E
CI	coef	variable
(0.1756643929121091, 0.19318486588224515)	-1.08359	Intercept
(0.11030605678357003, 0.09821636225440084)	0.410015	Poke-time
(0.17712781603060382, 0.1613892842229533)	0.190131	Trial
(0.24580329599517983, 0.2604063448614012)	0.45985	Age: Juveniles
(0.2412334897744828, 0.2692257709177724)	0.0367862	Trial & Age: Juveniles
(0.12996444503000096, 0.15723878788124918)	-0.168521	Poke-time & Age: Juveniles

## Sheet: 2F
Age	MouseID	Num_pokes		Age	MouseID	AfterLast
Adults	RJ13	3.225		Adults	RJ13	2.3
Adults	RJ14	4.16279		Adults	RJ14	3.15116
Adults	RJ15	4.4359		Adults	RJ15	3.46154
Adults	RJ16	4.06452		Adults	RJ16	3.22581
Adults	RJ17	5.28205		Adults	RJ17	4.35897
Adults	RJ18	2.29412		Adults	RJ18	1.39216
Adults	RJ19	4.43421		Adults	RJ19	3.42105
Adults	RJ20	3.76087		Adults	RJ20	2.73913
Adults	RJ21	5.38983		Adults	RJ21	4.54237
Adults	RJ22	3.10377		Adults	RJ22	2.11321
Adults	RJ23	4.625		Adults	RJ23	3.55682
Adults	RJ24	3.65414		Adults	RJ24	2.69173
Adults	RJ61	3.26531		Adults	RJ61	2.29592
Adults	RJ62	2.875		Adults	RJ62	1.96875
Adults	RJ63	3.29474		Adults	RJ63	2.32632
Adults	RJ64	3.23301		Adults	RJ64	2.28155
Adults	RJ65	3.5625		Adults	RJ65	2.52083
Adults	RJ66	3.73333		Adults	RJ66	2.8
Adults	RJ68	3.152		Adults	RJ68	2.224
Adults	RJ69	3.13043		Adults	RJ69	2.18841
Adults	RJ70	6.58491		Adults	RJ70	5.54717
Juveniles	RJ01	2.34211		Juveniles	RJ01	1.40789
Juveniles	RJ02	3.43878		Juveniles	RJ02	2.45918
Juveniles	RJ03	3.73333		Juveniles	RJ03	2.86667
Juveniles	RJ04	2.34752		Juveniles	RJ04	1.44681
Juveniles	RJ05	2.20968		Juveniles	RJ05	1.33871
Juveniles	RJ06	3.23333		Juveniles	RJ06	2.33333
Juveniles	RJ07	3.42683		Juveniles	RJ07	2.4878
Juveniles	RJ08	2.06383		Juveniles	RJ08	1.23404
Juveniles	RJ09	2.26087		Juveniles	RJ09	1.33333
Juveniles	RJ10	2.69048		Juveniles	RJ10	1.7381
Juveniles	RJ11	2.4881		Juveniles	RJ11	1.45238
Juveniles	RJ12	2.57143		Juveniles	RJ12	1.71429
Juveniles	RJ49	2.92308		Juveniles	RJ49	1.96923
Juveniles	RJ50	3.13433		Juveniles	RJ50	2.16418
Juveniles	RJ51	2.61765		Juveniles	RJ51	1.55882
Juveniles	RJ52	3.9375		Juveniles	RJ52	3.04167
Juveniles	RJ53	3.36364		Juveniles	RJ53	2.5
Juveniles	RJ54	3.93103		Juveniles	RJ54	3
Juveniles	RJ55	3.88372		Juveniles	RJ55	2.95349
Juveniles	RJ56	3.70213		Juveniles	RJ56	2.91489
Juveniles	RJ57	4.6875		Juveniles	RJ57	3.71875
Juveniles	RJ59	2.92308		Juveniles	RJ59	1.92308
Juveniles	RJ60	2.46512		Juveniles	RJ60	1.51163

## Sheet: 2G
Age	BinnedLogOut	Median	CI
Adults	-1	1	(0.0, 0.0)
Juveniles	-1	1	(0.0, 0.0)
Adults	-0.9	1	(0.0, 0.0)
Juveniles	-0.9	1	(0.0, 0.0)
Adults	-0.8	1	(0.0, 0.0)
Juveniles	-0.8	1	(0.0, 0.0)
Adults	-0.7	1	(0.0, 0.0)
Juveniles	-0.7	1	(0.0, 0.0)
Adults	-0.6	1	(0.0, 0.0)
Juveniles	-0.6	1	(0.0, 0.0)
Adults	-0.5	1	(0.0, 0.0)
Juveniles	-0.5	1	(0.0, 0.0)
Adults	-0.4	1	(0.0, 0.0)
Juveniles	-0.4	1	(0.0, 0.0)
Adults	-0.3	1	(0.0, 0.0)
Juveniles	-0.3	1	(0.0, 0.0)
Adults	-0.2	1	(0.0, 0.0)
Juveniles	-0.2	1	(0.0, 0.0)
Adults	-0.1	1	(0.0, 0.0)
Juveniles	-0.1	1	(0.0, 0.0)
Adults	0	1	(0.0, 0.0)
Juveniles	0	1	(0.0, 0.0)
Adults	0	1	(0.0, 0.0)
Juveniles	0	1	(0.0, 0.0)
Adults	0.1	1	(0.0, 0.0)
Juveniles	0.1	1	(0.0, 0.0)
Adults	0.2	1	(0.0, 0.0)
Juveniles	0.2	1	(0.0, 0.0)
Adults	0.3	1	(0.0, 0.0)
Juveniles	0.3	1	(0.0, 0.0)
Adults	0.4	1	(0.0, 0.0)
Juveniles	0.4	1	(0.0, 0.0)
Adults	0.5	1	(0.0, 0.0)
Juveniles	0.5	1	(0.002305665349164321, 0.0)
Adults	0.6	0.989404	(0.03161039620130879, 0.01059571462210318)
Juveniles	0.6	0.895409	(0.029263215496413086, 0.029664054556203134)
Adults	0.7	0.884661	(0.03479010409877592, 0.026743951056114268)
Juveniles	0.7	0.729824	(0.081378044302023, 0.05364821541958431)
Adults	0.8	0.712659	(0.021856893940881306, 0.022734807655467093)
Juveniles	0.8	0.604725	(0.0528174177036822, 0.083294560552989)
Adults	0.9	0.641141	(0.017163950872265077, 0.023742881188635323)
Juveniles	0.9	0.56051	(0.03972131452547112, 0.041734122630352366)
Adults	1	0.571168	(0.02833422211694825, 0.03376884162284732)
Juveniles	1	0.447881	(0.03465721829226537, 0.03082446434670011)
Adults	1.1	0.514967	(0.01997849766904708, 0.03771253433513588)
Juveniles	1.1	0.405482	(0.03309476623571456, 0.046364049139848595)
Adults	1.2	0.433885	(0.022163754873039954, 0.04423488162044387)
Juveniles	1.2	0.32051	(0.03834174479289654, 0.05564797491046719)
Adults	1.3	0.366716	(0.03485047074576175, 0.026554202944539085)
Juveniles	1.3	0.273127	(0.040131823326000376, 0.02324057591418527)
Adults	1.4	0.319659	(0.02236887802534665, 0.021832431225639104)
Juveniles	1.4	0.23226	(0.025623618808242793, 0.027114622759029094)
Adults	1.5	0.219533	(0.023478672608493567, 0.023806143679102082)
Juveniles	1.5	0.182593	(0.03867608801441427, 0.017438146147766564)
Adults	1.6	0.187154	(0.012825425894704728, 0.011638282686532386)
Juveniles	1.6	0.107194	(0.010043994509394666, 0.020086524923555338)
Adults	1.7	0.175734	(0.01964047338952618, 0.022072446694725134)
Juveniles	1.7	0.0904673	(0.014521877119593157, 0.02063884560023986)
Adults	1.8	0.120091	(0.01629654835569669, 0.016638214369595963)
Juveniles	1.8	0.0767831	(0.009490704647875006, 0.013230206456782412)
Adults	1.9	0.116077	(0.020219562194884633, 0.0330558890351495)
Juveniles	1.9	0.0556845	(0.006266631976848194, 0.011907497306762674)
Adults	2	0.0663215	(0.011329102488726359, 0.022814505344169234)
Juveniles	2	0.0440383	(0.010146503253841414, 0.008739806431965376)
Adults	2.1	0.0631813	(0.012078759330122514, 0.02033987763396121)
Juveniles	2.1	0.0440468	(0.011946029070692213, 0.01889981429425737)
Adults	2.2	0.0629432	(0.015917723025949203, 0.020321100611473866)
Juveniles	2.2	0.0317952	(0.011391528684888633, 0.008889194268849744)
Adults	2.3	0.0582371	(0.01847638389380609, 0.02078928043708487)
Juveniles	2.3	0.0217478	(0.0037262394567101967, 0.008703878470250361)
Adults	2.4	0.0539853	(0.015068300159074309, 0.010448876042173226)
Juveniles	2.4	0.016897	(0.004328496970109138, 0.02490617389598106)
Adults	2.5	0.0226302	(0.006953498917199662, 0.022817345968652356)
Juveniles	2.5	0.0146183	(0.001415146628874188, 0.01340832672903479)
Adults	2.6	0.055774	(0.04374025238604448, 0.004202898274571869)
Juveniles	2.6	0.00787842	(0.0026216389672104852, 0.004196294348857323)
Juveniles	2.7	0.008137	(0.002545918297079601, 0.008929695006967744)
Adults	2.8	0.0248939	(0.0001715599896872609, 0.0001715599896872609)
Juveniles	2.8	0.011266	(0.004603490554586524, 0.0022494287594827366)
Juveniles	2.9	0.00515699	(0.0014368903915033078, 0.0022641866869877432)
Juveniles	3	0.00971064	(0.0, 0.0)

## Sheet: 2H
coef	CI	variable
0.0478287	(0.04714382630524873, 0.04687321590452673)	Intercept
-0.896998	(0.04415990431474548, 0.046135325978442165)	Poke-time
-0.175068	(0.0715946827354951, 0.06296073354885685)	Age: Juveniles
0.0639247	(0.06392264910344106, 0.062305521846321515)	Poke-time & Age: Juveniles

## Sheet: Age_PokeData
Pre-processed data	MouseID	Age	Sex	Side	Streak	Poke	Correct	In	Out
	RJ01	Juveniles	M	L	1	1	FALSE	0	0.197
	RJ01	Juveniles	M	L	1	2	FALSE	0.606	0.744
	RJ01	Juveniles	M	L	1	3	FALSE	1.359	9.161
	RJ01	Juveniles	M	L	1	4	FALSE	9.179	10.04
	RJ01	Juveniles	M	R	2	5	TRUE	0	5.775
	RJ01	Juveniles	M	R	2	6	FALSE	5.919	6.545
	RJ01	Juveniles	M	R	2	7	FALSE	6.714	6.831
	RJ01	Juveniles	M	R	2	8	FALSE	7.021	7.332
	RJ01	Juveniles	M	R	2	9	FALSE	19.778	20.816
	RJ01	Juveniles	M	R	2	10	FALSE	20.944	21.229
	RJ01	Juveniles	M	L	3	11	TRUE	0	1.911
	RJ01	Juveniles	M	R	4	12	TRUE	0	2.497
	RJ01	Juveniles	M	L	5	13	TRUE	0	3.665
	RJ01	Juveniles	M	L	5	14	FALSE	12.134	13.287
	RJ01	Juveniles	M	R	6	15	TRUE	0	1.335
	RJ01	Juveniles	M	R	6	16	TRUE	38.23	40.41
	RJ01	Juveniles	M	L	7	17	TRUE	0	2.57
	RJ01	Juveniles	M	L	7	18	FALSE	3.337	5.358
	RJ01	Juveniles	M	L	7	19	FALSE	10.266	11.045
	RJ01	Juveniles	M	R	8	20	TRUE	0	1.61
	RJ01	Juveniles	M	R	8	21	FALSE	12.591	12.983
	RJ01	Juveniles	M	R	8	22	FALSE	64.096	65.459
	RJ01	Juveniles	M	L	9	23	TRUE	0	2.85
	RJ01	Juveniles	M	L	9	24	FALSE	4.172	5.083
	RJ01	Juveniles	M	R	10	25	TRUE	0	2.075
	RJ01	Juveniles	M	L	11	26	TRUE	0	2.169
	RJ01	Juveniles	M	R	12	27	TRUE	0	1.963
	RJ01	Juveniles	M	R	12	28	FALSE	2.56	3.217
	RJ01	Juveniles	M	R	12	29	FALSE	14.752	15.345
	RJ01	Juveniles	M	R	12	30	FALSE	24.915	25.19
	RJ01	Juveniles	M	L	13	31	TRUE	0	3.947
	RJ01	Juveniles	M	L	13	32	TRUE	3.961	5.867
	RJ01	Juveniles	M	L	13	33	FALSE	11.422	13.305
	RJ01	Juveniles	M	R	14	34	TRUE	0	2.672
	RJ01	Juveniles	M	R	14	35	FALSE	20.286	21.076
	RJ01	Juveniles	M	R	14	36	FALSE	21.103	21.219
	RJ01	Juveniles	M	R	14	37	FALSE	21.608	23.597
	RJ01	Juveniles	M	R	14	38	FALSE	25.926	27.369
	RJ01	Juveniles	M	L	15	39	TRUE	0	4.315
	RJ01	Juveniles	M	L	15	40	FALSE	5.173	5.365
	RJ01	Juveniles	M	L	15	41	FALSE	5.388	6.791
	RJ01	Juveniles	M	L	15	42	FALSE	8.541	9.701
	RJ01	Juveniles	M	L	15	43	FALSE	10.143	10.409
	RJ01	Juveniles	M	L	15	44	FALSE	15.253	16.759
	RJ01	Juveniles	M	L	15	45	FALSE	30.283	32.229
	RJ01	Juveniles	M	R	16	46	TRUE	0	2.614
	RJ01	Juveniles	M	L	17	47	TRUE	0	0.583
	RJ01	Juveniles	M	L	17	48	FALSE	0.597	0.716
	RJ01	Juveniles	M	L	17	49	FALSE	0.732	1.271
	RJ01	Juveniles	M	L	17	50	FALSE	3.948	5.63
	RJ01	Juveniles	M	L	17	51	FALSE	8.302	8.745
	RJ01	Juveniles	M	R	18	52	TRUE	0	1.576
	RJ01	Juveniles	M	L	19	53	TRUE	0	2.722
	RJ01	Juveniles	M	L	19	54	FALSE	8.568	10.018
	RJ01	Juveniles	M	L	19	55	FALSE	10.994	11.964
	RJ01	Juveniles	M	R	20	56	TRUE	0	2.414
	RJ01	Juveniles	M	R	20	57	FALSE	2.483	3.462
	RJ01	Juveniles	M	L	21	58	TRUE	0	3.667
	RJ01	Juveniles	M	L	21	59	FALSE	4.009	4.395
	RJ01	Juveniles	M	L	21	60	FALSE	16.748	17.996
	RJ01	Juveniles	M	L	21	61	FALSE	26.581	27.194
	RJ01	Juveniles	M	R	22	62	TRUE	0	1.953
	RJ01	Juveniles	M	L	23	63	TRUE	0	1.497
	RJ01	Juveniles	M	R	24	64	TRUE	0	2.446
	RJ01	Juveniles	M	R	24	65	FALSE	20.942	21.552
	RJ01	Juveniles	M	R	24	66	FALSE	24.738	25.449
	RJ01	Juveniles	M	L	25	67	TRUE	0	4.416
	RJ01	Juveniles	M	L	25	68	FALSE	30.515	32.183
	RJ01	Juveniles	M	L	25	69	FALSE	35.328	35.891
	RJ01	Juveniles	M	R	26	70	TRUE	0	2.552
	RJ01	Juveniles	M	L	27	71	TRUE	0	3.216
	RJ01	Juveniles	M	L	27	72	FALSE	3.523	3.815
	RJ01	Juveniles	M	L	27	73	FALSE	12.453	13.75
	RJ01	Juveniles	M	R	28	74	TRUE	0	1.795
	RJ01	Juveniles	M	R	28	75	FALSE	13.564	14.303
	RJ01	Juveniles	M	L	29	76	TRUE	0	3.706
	RJ01	Juveniles	M	L	29	77	FALSE	3.953	4.711
	RJ01	Juveniles	M	L	29	78	FALSE	7.474	8.33
	RJ01	Juveniles	M	R	30	79	TRUE	0	1.978
	RJ01	Juveniles	M	R	30	80	FALSE	3.197	3.534
	RJ01	Juveniles	M	L	31	81	TRUE	0	3.493
	RJ01	Juveniles	M	L	31	82	FALSE	6.43	7.366
	RJ01	Juveniles	M	R	32	83	TRUE	0	1.92
	RJ01	Juveniles	M	L	33	84	TRUE	0	3.903
	RJ01	Juveniles	M	L	33	85	FALSE	12.238	13.168
	RJ01	Juveniles	M	L	33	86	FALSE	42.663	44.167
	RJ01	Juveniles	M	L	33	87	FALSE	53.08	53.716
	RJ01	Juveniles	M	R	34	88	TRUE	0	2.495
	RJ01	Juveniles	M	L	35	89	TRUE	0	3.307
	RJ01	Juveniles	M	R	36	90	TRUE	0	1.656
	RJ01	Juveniles	M	R	36	91	FALSE	1.904	2.33
	RJ01	Juveniles	M	L	37	92	TRUE	0	0.749
	RJ01	Juveniles	M	R	38	93	TRUE	0	1.823
	RJ01	Juveniles	M	R	38	94	FALSE	11.305	11.721
	RJ01	Juveniles	M	L	39	95	TRUE	0	2.844
	RJ01	Juveniles	M	L	39	96	FALSE	10.194	11.338
	RJ01	Juveniles	M	L	39	97	FALSE	13.541	13.967
	RJ01	Juveniles	M	R	40	98	TRUE	0	2.287
	RJ01	Juveniles	M	R	40	99	FALSE	22.972	23.699
	RJ01	Juveniles	M	L	41	100	TRUE	0	3.048
	RJ01	Juveniles	M	L	41	101	FALSE	60.009	60.903
	RJ01	Juveniles	M	L	41	102	FALSE	77.982	78.436
	RJ01	Juveniles	M	L	41	103	FALSE	87.99	89.001
	RJ01	Juveniles	M	L	41	104	FALSE	136.18	136.757
	RJ01	Juveniles	M	R	42	105	TRUE	0	0.643
	RJ01	Juveniles	M	L	43	106	FALSE	0	0.538
	RJ01	Juveniles	M	R	44	107	TRUE	0	1.983
	RJ01	Juveniles	M	R	44	108	FALSE	2.314	2.737
	RJ01	Juveniles	M	L	45	109	TRUE	0	3.218
	RJ01	Juveniles	M	L	45	110	FALSE	5.027	5.869
	RJ01	Juveniles	M	L	45	111	FALSE	15.828	16.384
	RJ01	Juveniles	M	R	46	112	TRUE	0	3.481
	RJ01	Juveniles	M	R	46	113	FALSE	18.456	19.524
	RJ01	Juveniles	M	L	47	114	TRUE	0	3.607
	RJ01	Juveniles	M	L	47	115	FALSE	6.693	7.498
	RJ01	Juveniles	M	L	47	116	FALSE	11.437	12.364
	RJ01	Juveniles	M	L	47	117	FALSE	12.461	12.935
	RJ01	Juveniles	M	L	47	118	FALSE	22.269	22.725
	RJ01	Juveniles	M	L	47	119	FALSE	30.049	30.401
	RJ01	Juveniles	M	L	47	120	FALSE	39.705	40.677
	RJ01	Juveniles	M	L	47	121	FALSE	55.734	56.891
	RJ01	Juveniles	M	R	48	122	TRUE	0	2.465
	RJ01	Juveniles	M	L	49	123	TRUE	0	0.413
	RJ01	Juveniles	M	L	49	124	FALSE	2.848	3.312
	RJ01	Juveniles	M	R	50	125	TRUE	0	3.289
	RJ01	Juveniles	M	R	50	126	FALSE	9.224	9.825
	RJ01	Juveniles	M	L	51	127	TRUE	0	2.709
	RJ01	Juveniles	M	L	51	128	FALSE	5.259	5.593
	RJ01	Juveniles	M	R	52	129	TRUE	0	2.232
	RJ01	Juveniles	M	R	52	130	FALSE	6.802	7.117
	RJ01	Juveniles	M	L	53	131	TRUE	0	3.122
	RJ01	Juveniles	M	L	53	132	FALSE	6.449	6.905
	RJ01	Juveniles	M	L	53	133	FALSE	14.042	14.804
	RJ01	Juveniles	M	R	54	134	TRUE	0	1.857
	RJ01	Juveniles	M	L	55	135	TRUE	0	0.508
	RJ01	Juveniles	M	R	56	136	TRUE	0	1.568
	RJ01	Juveniles	M	R	56	137	FALSE	3.54	3.999
	RJ01	Juveniles	M	R	56	138	FALSE	4.017	4.668
	RJ01	Juveniles	M	L	57	139	TRUE	0	2.061
	RJ01	Juveniles	M	R	58	140	TRUE	0	1.805
	RJ01	Juveniles	M	L	59	141	TRUE	0	2.141
	RJ01	Juveniles	M	R	60	142	TRUE	0	1.612
	RJ01	Juveniles	M	L	61	143	TRUE	0	2.629
	RJ01	Juveniles	M	L	61	144	TRUE	2.846	4.583
	RJ01	Juveniles	M	L	61	145	FALSE	6	6.578
	RJ01	Juveniles	M	L	61	146	FALSE	19.556	20.038
	RJ01	Juveniles	M	R	62	147	TRUE	0	1.77
	RJ01	Juveniles	M	R	62	148	FALSE	19.471	19.943
	RJ01	Juveniles	M	L	63	149	TRUE	0	2.277
	RJ01	Juveniles	M	L	63	150	TRUE	39.169	40.841
	RJ01	Juveniles	M	L	63	151	FALSE	77.835	78.213
	RJ01	Juveniles	M	L	63	152	FALSE	90.941	91.457
	RJ01	Juveniles	M	L	63	153	FALSE	131.928	132.981
	RJ01	Juveniles	M	R	64	154	TRUE	0	1.595
	RJ01	Juveniles	M	L	65	155	TRUE	0	1.715
	RJ01	Juveniles	M	L	65	156	FALSE	18.065	18.443
	RJ01	Juveniles	M	L	65	157	FALSE	75.597	76.034
	RJ01	Juveniles	M	L	65	158	FALSE	95.1	96.894
	RJ01	Juveniles	M	L	65	159	FALSE	96.957	97.876
	RJ01	Juveniles	M	R	66	160	TRUE	0	1.195
	RJ01	Juveniles	M	L	67	161	TRUE	0	1.711
	RJ01	Juveniles	M	R	68	162	FALSE	0	0.469
	RJ01	Juveniles	M	L	69	163	TRUE	0	2.154
	RJ01	Juveniles	M	L	69	164	FALSE	2.369	2.578
	RJ01	Juveniles	M	L	69	165	FALSE	19.613	20.073
	RJ01	Juveniles	M	L	69	166	FALSE	20.199	20.428
	RJ01	Juveniles	M	L	69	167	FALSE	31.314	31.481
	RJ01	Juveniles	M	R	70	168	TRUE	0	0.763
	RJ01	Juveniles	M	L	71	169	TRUE	0	1.126
	RJ01	Juveniles	M	L	71	170	FALSE	45.275	45.667
	RJ01	Juveniles	M	L	71	171	FALSE	103.043	103.797
	RJ01	Juveniles	M	R	72	172	TRUE	0	0.96
	RJ01	Juveniles	M	L	73	173	TRUE	0	2.072
	RJ01	Juveniles	M	L	73	174	TRUE	188.428	190.426
	RJ01	Juveniles	M	R	74	175	TRUE	0	1.055
	RJ01	Juveniles	M	L	75	176	FALSE	0	0.879
	RJ01	Juveniles	M	L	75	177	FALSE	3.487	3.645
	RJ01	Juveniles	M	R	76	178	TRUE	0	0.97
	RJ02	Juveniles	M	R	1	1	TRUE	0	4.314
	RJ02	Juveniles	M	R	1	2	FALSE	4.686	7.027
	RJ02	Juveniles	M	L	2	3	TRUE	0	3.911
	RJ02	Juveniles	M	L	2	4	FALSE	7.982	9.346
	RJ02	Juveniles	M	L	2	5	FALSE	11.365	11.972
	RJ02	Juveniles	M	R	3	6	TRUE	0	1.024
	RJ02	Juveniles	M	R	3	7	FALSE	1.046	1.353
	RJ02	Juveniles	M	R	3	8	FALSE	9.255	9.658
	RJ02	Juveniles	M	L	4	9	TRUE	0	1.267
	RJ02	Juveniles	M	R	5	10	TRUE	0	1.065
	RJ02	Juveniles	M	R	5	11	FALSE	27.203	27.526
	RJ02	Juveniles	M	L	6	12	TRUE	0	2.234
	RJ02	Juveniles	M	L	6	13	FALSE	2.657	3.788
	RJ02	Juveniles	M	L	6	14	FALSE	15.675	16.032
	RJ02	Juveniles	M	L	6	15	FALSE	32.283	32.541
	RJ02	Juveniles	M	L	6	16	FALSE	44.792	45.85
	RJ02	Juveniles	M	L	6	17	FALSE	60.323	60.734
	RJ02	Juveniles	M	L	6	18	FALSE	77.744	77.927
	RJ02	Juveniles	M	L	6	19	FALSE	78.002	78.393
	RJ02	Juveniles	M	R	7	20	TRUE	0	1.372
	RJ02	Juveniles	M	R	7	21	FALSE	10.412	10.706
	RJ02	Juveniles	M	L	8	22	TRUE	0	5.601
	RJ02	Juveniles	M	L	8	23	TRUE	5.849	7.42
	RJ02	Juveniles	M	L	8	24	FALSE	8.781	10.09
	RJ02	Juveniles	M	L	8	25	FALSE	11.806	13.598
	RJ02	Juveniles	M	L	8	26	FALSE	13.617	14.216
	RJ02	Juveniles	M	L	8	27	FALSE	36.384	39.149
	RJ02	Juveniles	M	R	9	28	TRUE	0	0.3
	RJ02	Juveniles	M	R	9	29	TRUE	0.651	3.185
	RJ02	Juveniles	M	R	9	30	FALSE	4.25	4.944
	RJ02	Juveniles	M	R	9	31	FALSE	6.361	6.818
	RJ02	Juveniles	M	R	9	32	FALSE	10.037	10.468
	RJ02	Juveniles	M	L	10	33	TRUE	0	2.541
	RJ02	Juveniles	M	L	10	34	FALSE	3.089	3.661
	RJ02	Juveniles	M	L	10	35	FALSE	4.002	4.572
	RJ02	Juveniles	M	L	10	36	FALSE	4.605	5.711
	RJ02	Juveniles	M	L	10	37	FALSE	6.768	7.157
	RJ02	Juveniles	M	R	11	38	TRUE	0	0.114
	RJ02	Juveniles	M	R	11	39	FALSE	15.273	17.62
	RJ02	Juveniles	M	R	11	40	FALSE	18.016	18.457
	RJ02	Juveniles	M	L	12	41	TRUE	0	2.256
	RJ02	Juveniles	M	L	12	42	FALSE	2.623	3.313
	RJ02	Juveniles	M	L	12	43	FALSE	3.77	3.987
	RJ02	Juveniles	M	L	12	44	FALSE	4.003	4.894
	RJ02	Juveniles	M	L	12	45	FALSE	7.049	7.448
	RJ02	Juveniles	M	L	12	46	FALSE	18.905	19.305
	RJ02	Juveniles	M	L	12	47	FALSE	28.369	28.637
	RJ02	Juveniles	M	R	13	48	TRUE	0	4.215
	RJ02	Juveniles	M	R	13	49	FALSE	4.71	5.352
	RJ02	Juveniles	M	R	13	50	FALSE	6.426	6.86
	RJ02	Juveniles	M	L	14	51	TRUE	0	3.534
	RJ02	Juveniles	M	L	14	52	FALSE	3.69	4.84
	RJ02	Juveniles	M	L	14	53	FALSE	6.3	7.225
	RJ02	Juveniles	M	L	14	54	FALSE	7.546	8.267
	RJ02	Juveniles	M	L	14	55	FALSE	8.899	9.409
	RJ02	Juveniles	M	L	14	56	FALSE	9.885	10.874
	RJ02	Juveniles	M	L	14	57	FALSE	16.351	17.049
	RJ02	Juveniles	M	R	15	58	TRUE	0	2.322
	RJ02	Juveniles	M	R	15	59	FALSE	11.625	11.981
	RJ02	Juveniles	M	L	16	60	TRUE	0	2.458
	RJ02	Juveniles	M	L	16	61	FALSE	3.201	3.571
	RJ02	Juveniles	M	R	17	62	TRUE	0	2.363
	RJ02	Juveniles	M	R	17	63	FALSE	2.565	3.116
	RJ02	Juveniles	M	L	18	64	TRUE	0	2.197
	RJ02	Juveniles	M	R	19	65	TRUE	0	2.074
	RJ02	Juveniles	M	R	19	66	FALSE	2.328	2.651
	RJ02	Juveniles	M	R	19	67	FALSE	49.878	50.642
	RJ02	Juveniles	M	R	19	68	FALSE	50.835	51.431
	RJ02	Juveniles	M	R	19	69	FALSE	54.142	54.526
	RJ02	Juveniles	M	L	20	70	TRUE	0	2.069
	RJ02	Juveniles	M	L	20	71	FALSE	2.517	2.789
	RJ02	Juveniles	M	L	20	72	FALSE	54.723	55.773
	RJ02	Juveniles	M	L	20	73	FALSE	56.121	56.453
	RJ02	Juveniles	M	L	20	74	FALSE	56.51	56.898
	RJ02	Juveniles	M	L	20	75	FALSE	81.144	81.615
	RJ02	Juveniles	M	L	20	76	FALSE	151.797	152.741
	RJ02	Juveniles	M	L	20	77	FALSE	152.968	153.538
	RJ02	Juveniles	M	L	20	78	FALSE	156.549	157.187
	RJ02	Juveniles	M	R	21	79	TRUE	0	2.27
	RJ02	Juveniles	M	R	21	80	FALSE	18.699	19.321
	RJ02	Juveniles	M	R	21	81	FALSE	19.586	20.146
	RJ02	Juveniles	M	R	21	82	FALSE	20.537	21.052
	RJ02	Juveniles	M	R	21	83	FALSE	24.654	24.767
	RJ02	Juveniles	M	L	22	84	TRUE	0	4.352
	RJ02	Juveniles	M	L	22	85	TRUE	4.742	8.289
	RJ02	Juveniles	M	L	22	86	FALSE	8.841	9.48
	RJ02	Juveniles	M	L	22	87	FALSE	9.792	11.354
	RJ02	Juveniles	M	L	22	88	FALSE	12.035	12.894
	RJ02	Juveniles	M	L	22	89	FALSE	13.69	14.276
	RJ02	Juveniles	M	L	22	90	FALSE	14.329	14.443
	RJ02	Juveniles	M	L	22	91	FALSE	15.04	15.5
	RJ02	Juveniles	M	R	23	92	TRUE	0	2.74
	RJ02	Juveniles	M	R	23	93	FALSE	2.943	3.422
	RJ02	Juveniles	M	R	23	94	FALSE	4.183	5.678
	RJ02	Juveniles	M	R	23	95	FALSE	7.558	8.327
	RJ02	Juveniles	M	R	23	96	FALSE	8.668	8.893
	RJ02	Juveniles	M	L	24	97	TRUE	0	2.832
	RJ02	Juveniles	M	L	24	98	FALSE	3.151	3.818
	RJ02	Juveniles	M	L	24	99	FALSE	4.294	4.913
	RJ02	Juveniles	M	L	24	100	FALSE	7.403	8.392
	RJ02	Juveniles	M	R	25	101	TRUE	0	2.305
	RJ02	Juveniles	M	R	25	102	TRUE	2.674	3.194
	RJ02	Juveniles	M	R	25	103	FALSE	3.642	3.849
	RJ02	Juveniles	M	R	25	104	FALSE	3.881	5.752
	RJ02	Juveniles	M	R	25	105	FALSE	8.399	9.904
	RJ02	Juveniles	M	R	25	106	FALSE	10.057	10.171
	RJ02	Juveniles	M	R	25	107	FALSE	14.395	14.865
	RJ02	Juveniles	M	R	25	108	FALSE	15.093	15.391
	RJ02	Juveniles	M	L	26	109	TRUE	0	2.348
	RJ02	Juveniles	M	L	26	110	FALSE	3.495	4.845
	RJ02	Juveniles	M	R	27	111	TRUE	0	1.695
	RJ02	Juveniles	M	L	28	112	TRUE	0	2.675
	RJ02	Juveniles	M	L	28	113	FALSE	2.959	3.449
	RJ02	Juveniles	M	L	28	114	FALSE	5.147	6.296
	RJ02	Juveniles	M	L	28	115	FALSE	7.922	10.027
	RJ02	Juveniles	M	R	29	116	TRUE	0	2.356
	RJ02	Juveniles	M	R	29	117	FALSE	6.519	7.462
	RJ02	Juveniles	M	L	30	118	TRUE	0	2.682
	RJ02	Juveniles	M	L	30	119	FALSE	2.891	3.314
	RJ02	Juveniles	M	L	30	120	FALSE	16.977	18.232
	RJ02	Juveniles	M	R	31	121	TRUE	0	2.062
	RJ02	Juveniles	M	L	32	122	TRUE	0	2.636
	RJ02	Juveniles	M	L	32	123	FALSE	2.9	3.197
	RJ02	Juveniles	M	R	33	124	TRUE	0	1.708
	RJ02	Juveniles	M	L	34	125	TRUE	0	2.907
	RJ02	Juveniles	M	L	34	126	TRUE	3.84	6.248
	RJ02	Juveniles	M	L	34	127	FALSE	7.276	8.249
	RJ02	Juveniles	M	R	35	128	TRUE	0	2.502
	RJ02	Juveniles	M	R	35	129	FALSE	2.912	3.605
	RJ02	Juveniles	M	L	36	130	TRUE	0	0.365
	RJ02	Juveniles	M	L	36	131	FALSE	0.458	2.723
	RJ02	Juveniles	M	L	36	132	FALSE	3.046	5.157
	RJ02	Juveniles	M	L	36	133	FALSE	5.7	6.227
	RJ02	Juveniles	M	L	36	134	FALSE	6.599	7.965
	RJ02	Juveniles	M	R	37	135	TRUE	0	3.762
	RJ02	Juveniles	M	R	37	136	FALSE	3.913	4.396
	RJ02	Juveniles	M	R	37	137	FALSE	25.061	25.987
	RJ02	Juveniles	M	R	37	138	FALSE	26.092	26.501
	RJ02	Juveniles	M	R	37	139	FALSE	26.873	27.384
	RJ02	Juveniles	M	R	37	140	FALSE	27.972	28.254
	RJ02	Juveniles	M	L	38	141	TRUE	0	3.177
	RJ02	Juveniles	M	L	38	142	FALSE	3.192	3.332
	RJ02	Juveniles	M	L	38	143	FALSE	3.436	3.736
	RJ02	Juveniles	M	L	38	144	FALSE	10.927	12.195
	RJ02	Juveniles	M	L	38	145	FALSE	13.758	14.35
	RJ02	Juveniles	M	L	38	146	FALSE	32.662	33.475
	RJ02	Juveniles	M	L	38	147	FALSE	111.694	112.534
	RJ02	Juveniles	M	L	38	148	FALSE	132.662	134.055
	RJ02	Juveniles	M	L	38	149	FALSE	134.406	134.625
	RJ02	Juveniles	M	L	38	150	FALSE	135.201	135.426
	RJ02	Juveniles	M	L	38	151	FALSE	138.227	138.832
	RJ02	Juveniles	M	R	39	152	TRUE	0	2.051
	RJ02	Juveniles	M	R	39	153	FALSE	8.656	9.189
	RJ02	Juveniles	M	L	40	154	TRUE	0	2.455
	RJ02	Juveniles	M	L	40	155	FALSE	10.547	11.708
	RJ02	Juveniles	M	L	40	156	FALSE	35.121	35.86
	RJ02	Juveniles	M	R	41	157	TRUE	0	0.631
	RJ02	Juveniles	M	L	42	158	TRUE	0	2.649
	RJ02	Juveniles	M	L	42	159	FALSE	5.423	5.859
	RJ02	Juveniles	M	L	42	160	FALSE	9.307	9.773
	RJ02	Juveniles	M	R	43	161	TRUE	0	1.827
	RJ02	Juveniles	M	R	43	162	FALSE	40.978	41.355
	RJ02	Juveniles	M	R	43	163	FALSE	58.905	59.435
	RJ02	Juveniles	M	L	44	164	TRUE	0	4.66
	RJ02	Juveniles	M	L	44	165	FALSE	5.087	5.552
	RJ02	Juveniles	M	L	44	166	FALSE	6.208	7.381
	RJ02	Juveniles	M	L	44	167	FALSE	10.237	11.18
	RJ02	Juveniles	M	L	44	168	FALSE	11.424	12.18
	RJ02	Juveniles	M	L	44	169	FALSE	53.33	54.309
	RJ02	Juveniles	M	L	44	170	FALSE	54.428	54.902
	RJ02	Juveniles	M	L	44	171	FALSE	70.074	70.601
	RJ02	Juveniles	M	L	44	172	FALSE	78.205	78.397
	RJ02	Juveniles	M	L	44	173	FALSE	122.649	123.193
	RJ02	Juveniles	M	L	44	174	FALSE	136.592	136.912
	RJ02	Juveniles	M	R	45	175	TRUE	0	2.162
	RJ02	Juveniles	M	R	45	176	FALSE	11.118	11.8
	RJ02	Juveniles	M	R	45	177	FALSE	18.212	18.507
	RJ02	Juveniles	M	L	46	178	TRUE	0	2.298
	RJ02	Juveniles	M	L	46	179	FALSE	3.584	4.002
	RJ02	Juveniles	M	L	46	180	FALSE	10.132	11.447
	RJ02	Juveniles	M	L	46	181	FALSE	12.083	12.926
	RJ02	Juveniles	M	L	46	182	FALSE	15.817	16.108
	RJ02	Juveniles	M	L	46	183	FALSE	52.431	53.016
	RJ02	Juveniles	M	R	47	184	TRUE	0	2.009
	RJ02	Juveniles	M	L	48	185	TRUE	0	2.409
	RJ02	Juveniles	M	R	49	186	TRUE	0	2.359
	RJ02	Juveniles	M	R	49	187	FALSE	7.875	8.762
	RJ02	Juveniles	M	L	50	188	TRUE	0	2.474
	RJ02	Juveniles	M	L	50	189	FALSE	13.405	14.587
	RJ02	Juveniles	M	L	50	190	FALSE	20.006	20.556
	RJ02	Juveniles	M	L	50	191	FALSE	40.287	41.276
	RJ02	Juveniles	M	L	50	192	FALSE	44.611	45.008
	RJ02	Juveniles	M	R	51	193	TRUE	0	2.107
	RJ02	Juveniles	M	R	51	194	TRUE	2.429	2.975
	RJ02	Juveniles	M	L	52	195	TRUE	0	3.243
	RJ02	Juveniles	M	L	52	196	FALSE	3.612	4.474
	RJ02	Juveniles	M	L	52	197	FALSE	6.32	7.621
	RJ02	Juveniles	M	L	52	198	FALSE	13.295	14.512
	RJ02	Juveniles	M	L	52	199	FALSE	24.996	26.292
	RJ02	Juveniles	M	L	52	200	FALSE	29.98	30.414
	RJ02	Juveniles	M	L	52	201	FALSE	36.872	37.449
	RJ02	Juveniles	M	R	53	202	TRUE	0	2.88
	RJ02	Juveniles	M	R	53	203	FALSE	3.175	3.966
	RJ02	Juveniles	M	R	53	204	FALSE	6.253	7.401
	RJ02	Juveniles	M	R	53	205	FALSE	7.787	8.555
	RJ02	Juveniles	M	R	53	206	FALSE	13.289	13.865
	RJ02	Juveniles	M	R	53	207	FALSE	14.102	14.305
	RJ02	Juveniles	M	R	53	208	FALSE	16.359	17.337
	RJ02	Juveniles	M	R	53	209	FALSE	28.189	28.914
	RJ02	Juveniles	M	R	53	210	FALSE	29.212	29.578
	RJ02	Juveniles	M	L	54	211	TRUE	0	3.04
	RJ02	Juveniles	M	L	54	212	FALSE	3.333	3.776
	RJ02	Juveniles	M	L	54	213	FALSE	7.722	8.468
	RJ02	Juveniles	M	R	55	214	TRUE	0	2.214
	RJ02	Juveniles	M	L	56	215	TRUE	0	2.436
	RJ02	Juveniles	M	L	56	216	FALSE	3.002	3.252
	RJ02	Juveniles	M	L	56	217	FALSE	3.536	3.734
	RJ02	Juveniles	M	L	56	218	FALSE	11.786	12.753
	RJ02	Juveniles	M	L	56	219	FALSE	52.531	53.372
	RJ02	Juveniles	M	L	56	220	FALSE	55.376	55.556
	RJ02	Juveniles	M	R	57	221	TRUE	0	1.622
	RJ02	Juveniles	M	R	57	222	FALSE	6.683	7.247
	RJ02	Juveniles	M	L	58	223	TRUE	0	2.986
	RJ02	Juveniles	M	L	58	224	FALSE	5.615	6.265
	RJ02	Juveniles	M	L	58	225	FALSE	16.275	16.44
	RJ02	Juveniles	M	L	58	226	FALSE	16.676	17.175
	RJ02	Juveniles	M	R	59	227	TRUE	0	1.61
	RJ02	Juveniles	M	R	59	228	FALSE	8.727	9.827
	RJ02	Juveniles	M	R	59	229	FALSE	10.881	11.553
	RJ02	Juveniles	M	R	59	230	FALSE	11.864	12.309
	RJ02	Juveniles	M	R	59	231	FALSE	13.217	13.938
	RJ02	Juveniles	M	R	59	232	FALSE	18.363	18.712
	RJ02	Juveniles	M	L	60	233	TRUE	0	2.094
	RJ02	Juveniles	M	L	60	234	FALSE	2.382	2.609
	RJ02	Juveniles	M	L	60	235	FALSE	25.901	26.651
	RJ02	Juveniles	M	L	60	236	FALSE	37.46	38.562
	RJ02	Juveniles	M	L	60	237	FALSE	53.706	54.105
	RJ02	Juveniles	M	R	61	238	TRUE	0	1.708
	RJ02	Juveniles	M	L	62	239	FALSE	0	0.634
	RJ02	Juveniles	M	L	62	240	FALSE	7.559	7.802
	RJ02	Juveniles	M	L	62	241	FALSE	18.277	18.607
	RJ02	Juveniles	M	R	63	242	TRUE	0	1.593
	RJ02	Juveniles	M	R	63	243	FALSE	11.574	12.118
	RJ02	Juveniles	M	L	64	244	TRUE	0	1.63
	RJ02	Juveniles	M	R	65	245	TRUE	0	1.575
	RJ02	Juveniles	M	L	66	246	TRUE	0	2.506
	RJ02	Juveniles	M	L	66	247	FALSE	5.046	5.379
	RJ02	Juveniles	M	L	66	248	FALSE	5.849	6.541
	RJ02	Juveniles	M	R	67	249	TRUE	0	0.534
	RJ02	Juveniles	M	L	68	250	TRUE	0	2.709
	RJ02	Juveniles	M	R	69	251	TRUE	0	1.799
	RJ02	Juveniles	M	R	69	252	FALSE	2.07	2.388
	RJ02	Juveniles	M	R	69	253	FALSE	3.79	4.226
	RJ02	Juveniles	M	L	70	254	TRUE	0	2.301
	RJ02	Juveniles	M	L	70	255	FALSE	3.131	3.628
	RJ02	Juveniles	M	L	70	256	FALSE	6.884	7.469
	RJ02	Juveniles	M	L	70	257	FALSE	8.908	9.244
	RJ02	Juveniles	M	R	71	258	TRUE	0	1.601
	RJ02	Juveniles	M	L	72	259	FALSE	0	0.579
	RJ02	Juveniles	M	R	73	260	TRUE	0	1.733
	RJ02	Juveniles	M	R	73	261	FALSE	4.096	4.531
	RJ02	Juveniles	M	R	73	262	FALSE	48.278	48.745
	RJ02	Juveniles	M	L	74	263	TRUE	0	2.919
	RJ02	Juveniles	M	L	74	264	FALSE	21.392	21.801
	RJ02	Juveniles	M	L	74	265	FALSE	21.934	22.389
	RJ02	Juveniles	M	R	75	266	TRUE	0	1.32
	RJ02	Juveniles	M	R	75	267	FALSE	19.393	19.854
	RJ02	Juveniles	M	L	76	268	TRUE	0	0.101
	RJ02	Juveniles	M	R	77	269	TRUE	0	0.294
	RJ02	Juveniles	M	R	77	270	FALSE	7.983	8.316
	RJ02	Juveniles	M	R	77	271	FALSE	10.615	10.907
	RJ02	Juveniles	M	R	77	272	FALSE	13.615	14.49
	RJ02	Juveniles	M	L	78	273	TRUE	0	1.825
	RJ02	Juveniles	M	L	78	274	FALSE	3.172	3.98
	RJ02	Juveniles	M	R	79	275	TRUE	0	1.259
	RJ02	Juveniles	M	R	79	276	FALSE	10.824	11.139
	RJ02	Juveniles	M	L	80	277	TRUE	0	2.821
	RJ02	Juveniles	M	R	81	278	TRUE	0	1.046
	RJ02	Juveniles	M	L	82	279	TRUE	0	1.142
	RJ02	Juveniles	M	L	82	280	FALSE	46.428	46.84
	RJ02	Juveniles	M	L	82	281	FALSE	64.404	64.692
	RJ02	Juveniles	M	L	82	282	FALSE	89.639	89.854
	RJ02	Juveniles	M	R	83	283	TRUE	0	0.296
	RJ02	Juveniles	M	R	83	284	FALSE	59.653	59.955
	RJ02	Juveniles	M	L	84	285	TRUE	0	0.936
	RJ02	Juveniles	M	L	84	286	FALSE	0.963	1.323
	RJ02	Juveniles	M	R	85	287	TRUE	0	1.434
	RJ02	Juveniles	M	R	85	288	FALSE	2.461	2.869
	RJ02	Juveniles	M	R	85	289	FALSE	15.959	16.28
	RJ02	Juveniles	M	R	85	290	FALSE	17.208	17.475
	RJ02	Juveniles	M	L	86	291	TRUE	0	5.679
	RJ02	Juveniles	M	L	86	292	FALSE	6.424	6.956
	RJ02	Juveniles	M	L	86	293	FALSE	8.16	8.545
	RJ02	Juveniles	M	L	86	294	FALSE	9.65	10.137
	RJ02	Juveniles	M	L	86	295	FALSE	14.67	15.136
	RJ02	Juveniles	M	L	86	296	FALSE	36.087	36.802
	RJ02	Juveniles	M	L	86	297	FALSE	37.569	38.078
	RJ02	Juveniles	M	L	86	298	FALSE	39.991	41.491
	RJ02	Juveniles	M	L	86	299	FALSE	43.378	44.323
	RJ02	Juveniles	M	L	86	300	FALSE	44.774	45.427
	RJ02	Juveniles	M	L	86	301	FALSE	55.959	56.355
	RJ02	Juveniles	M	R	87	302	TRUE	0	1.692
	RJ02	Juveniles	M	R	87	303	FALSE	2.997	3.192
	RJ02	Juveniles	M	R	87	304	FALSE	6.429	7.864
	RJ02	Juveniles	M	L	88	305	TRUE	0	0.193
	RJ02	Juveniles	M	L	88	306	FALSE	0.36	0.616
	RJ02	Juveniles	M	L	88	307	FALSE	0.799	2.054
	RJ02	Juveniles	M	L	88	308	FALSE	67.067	67.418
	RJ02	Juveniles	M	L	88	309	FALSE	69.56	70.346
	RJ02	Juveniles	M	L	88	310	FALSE	70.374	71.103
	RJ02	Juveniles	M	L	88	311	FALSE	80.753	81.128
	RJ02	Juveniles	M	R	89	312	TRUE	0	1.089
	RJ02	Juveniles	M	L	90	313	TRUE	0	2.208
	RJ02	Juveniles	M	L	90	314	FALSE	8.937	9.331
	RJ02	Juveniles	M	R	91	315	TRUE	0	1.58
	RJ02	Juveniles	M	R	91	316	FALSE	4.13	4.417
	RJ02	Juveniles	M	L	92	317	TRUE	0	0.471
	RJ02	Juveniles	M	L	92	318	FALSE	24.277	24.899
	RJ02	Juveniles	M	L	92	319	FALSE	36.713	36.973
	RJ02	Juveniles	M	R	93	320	TRUE	0	1.636
	RJ02	Juveniles	M	L	94	321	TRUE	0	1.74
	RJ02	Juveniles	M	L	94	322	FALSE	16.347	16.836
	RJ02	Juveniles	M	L	94	323	FALSE	29.772	30.315
	RJ02	Juveniles	M	L	94	324	FALSE	49.007	49.296
	RJ02	Juveniles	M	R	95	325	TRUE	0	1.282
	RJ02	Juveniles	M	R	95	326	FALSE	6.981	7.272
	RJ02	Juveniles	M	L	96	327	TRUE	0	2.721
	RJ02	Juveniles	M	L	96	328	FALSE	9.584	10.465
	RJ02	Juveniles	M	L	96	329	FALSE	28.784	29.156
	RJ02	Juveniles	M	L	96	330	FALSE	29.532	31.034
	RJ02	Juveniles	M	L	96	331	FALSE	35.177	35.633
	RJ02	Juveniles	M	L	96	332	FALSE	45.227	45.593
	RJ02	Juveniles	M	L	96	333	FALSE	67.07	67.566
	RJ02	Juveniles	M	R	97	334	TRUE	0	1.306
	RJ02	Juveniles	M	R	97	335	FALSE	2.243	2.681
	RJ02	Juveniles	M	R	97	336	FALSE	9.744	10.067
	RJ02	Juveniles	M	L	98	337	TRUE	0	1.641
	RJ03	Juveniles	M	R	1	1	TRUE	0	0.171
	RJ03	Juveniles	M	R	1	2	FALSE	0.354	0.552
	RJ03	Juveniles	M	R	1	3	FALSE	0.738	0.944
	RJ03	Juveniles	M	L	2	4	TRUE	0	0.473
	RJ03	Juveniles	M	R	3	5	TRUE	0	0.538
	RJ03	Juveniles	M	L	4	6	TRUE	0	0.682
	RJ03	Juveniles	M	L	4	7	FALSE	1.505	1.974
	RJ03	Juveniles	M	R	5	8	TRUE	0	0.447
	RJ03	Juveniles	M	R	5	9	TRUE	165.461	166.288
	RJ03	Juveniles	M	R	5	10	FALSE	166.321	179.323
	RJ03	Juveniles	M	R	5	11	FALSE	180.597	181.261
	RJ03	Juveniles	M	R	5	12	FALSE	184.719	185.337
	RJ03	Juveniles	M	R	5	13	FALSE	186.596	189.212
	RJ03	Juveniles	M	R	5	14	FALSE	190.418	191.381
	RJ03	Juveniles	M	R	5	15	FALSE	196.3	197.726
	RJ03	Juveniles	M	R	5	16	FALSE	199.048	199.502
	RJ03	Juveniles	M	R	5	17	FALSE	201.635	202.592
	RJ03	Juveniles	M	R	5	18	FALSE	203.333	204.778
	RJ03	Juveniles	M	R	5	19	FALSE	251.353	253.543
	RJ03	Juveniles	M	R	5	20	FALSE	254.295	256.3
	RJ03	Juveniles	M	R	5	21	FALSE	256.666	257.637
	RJ03	Juveniles	M	R	5	22	FALSE	261.972	264.481
	RJ03	Juveniles	M	L	6	23	TRUE	0	6.152
	RJ03	Juveniles	M	L	6	24	FALSE	8.102	8.727
	RJ03	Juveniles	M	L	6	25	FALSE	13.41	14.053
	RJ03	Juveniles	M	L	6	26	FALSE	20.509	20.812
	RJ03	Juveniles	M	R	7	27	TRUE	0	1.452
	RJ03	Juveniles	M	R	7	28	FALSE	5.65	6.66
	RJ03	Juveniles	M	L	8	29	TRUE	0	1.015
	RJ03	Juveniles	M	L	8	30	FALSE	2.973	3.73
	RJ03	Juveniles	M	L	8	31	FALSE	7.378	8.495
	RJ03	Juveniles	M	L	8	32	FALSE	11.887	15.282
	RJ03	Juveniles	M	L	8	33	FALSE	15.715	15.971
	RJ03	Juveniles	M	R	9	34	TRUE	0	2.648
	RJ03	Juveniles	M	R	9	35	TRUE	2.701	4.468
	RJ03	Juveniles	M	R	9	36	FALSE	5.548	6.983
	RJ03	Juveniles	M	R	9	37	FALSE	7.645	8.018
	RJ03	Juveniles	M	R	9	38	FALSE	11.636	13.874
	RJ03	Juveniles	M	R	9	39	FALSE	17.172	17.892
	RJ03	Juveniles	M	L	10	40	TRUE	0	1.832
	RJ03	Juveniles	M	L	10	41	FALSE	3.816	4.43
	RJ03	Juveniles	M	L	10	42	FALSE	5.06	5.546
	RJ03	Juveniles	M	L	10	43	FALSE	8.886	9.29
	RJ03	Juveniles	M	R	11	44	TRUE	0	0.643
	RJ03	Juveniles	M	R	11	45	FALSE	1.377	1.961
	RJ03	Juveniles	M	R	11	46	FALSE	4.852	7.797
	RJ03	Juveniles	M	L	12	47	TRUE	0	3.947
	RJ03	Juveniles	M	L	12	48	FALSE	4.313	4.953
	RJ03	Juveniles	M	L	12	49	FALSE	8.514	9.849
	RJ03	Juveniles	M	L	12	50	FALSE	10.893	11.347
	RJ03	Juveniles	M	L	12	51	FALSE	11.388	11.804
	RJ03	Juveniles	M	L	12	52	FALSE	11.957	12.616
	RJ03	Juveniles	M	L	12	53	FALSE	13.144	13.287
	RJ03	Juveniles	M	L	12	54	FALSE	13.667	14.047
	RJ03	Juveniles	M	L	12	55	FALSE	18.422	18.808
	RJ03	Juveniles	M	R	13	56	TRUE	0	2.282
	RJ03	Juveniles	M	R	13	57	FALSE	2.444	3.398
	RJ03	Juveniles	M	R	13	58	FALSE	7.968	8.593
	RJ03	Juveniles	M	L	14	59	TRUE	0	2.543
	RJ03	Juveniles	M	L	14	60	FALSE	68.06	68.369
	RJ03	Juveniles	M	L	14	61	FALSE	88.941	89.146
	RJ03	Juveniles	M	L	14	62	FALSE	89.79	91.814
	RJ03	Juveniles	M	L	14	63	FALSE	96.427	96.92
	RJ03	Juveniles	M	L	14	64	FALSE	103.619	104.449
	RJ03	Juveniles	M	R	15	65	TRUE	0	3.014
	RJ03	Juveniles	M	R	15	66	FALSE	12.361	13.213
	RJ03	Juveniles	M	L	16	67	TRUE	0	0.19
	RJ03	Juveniles	M	R	17	68	TRUE	0	1.699
	RJ03	Juveniles	M	R	17	69	FALSE	34.874	36.621
	RJ03	Juveniles	M	R	17	70	FALSE	40.681	41.166
	RJ03	Juveniles	M	R	17	71	FALSE	41.574	41.91
	RJ03	Juveniles	M	L	18	72	TRUE	0	2.091
	RJ03	Juveniles	M	L	18	73	FALSE	37.499	37.728
	RJ03	Juveniles	M	R	19	74	TRUE	0	0.159
	RJ03	Juveniles	M	R	19	75	FALSE	0.464	2.284
	RJ03	Juveniles	M	L	20	76	TRUE	0	2.293
	RJ03	Juveniles	M	L	20	77	FALSE	5.583	6.168
	RJ03	Juveniles	M	L	20	78	FALSE	9.581	10.444
	RJ03	Juveniles	M	L	20	79	FALSE	10.866	11.353
	RJ03	Juveniles	M	R	21	80	TRUE	0	1.026
	RJ03	Juveniles	M	R	21	81	FALSE	61.636	62.657
	RJ03	Juveniles	M	L	22	82	TRUE	0	3.413
	RJ03	Juveniles	M	R	23	83	FALSE	0	0.827
	RJ03	Juveniles	M	L	24	84	TRUE	0	1.824
	RJ03	Juveniles	M	L	24	85	FALSE	4.871	5.487
	RJ03	Juveniles	M	L	24	86	FALSE	9.408	10.011
	RJ03	Juveniles	M	L	24	87	FALSE	10.203	10.755
	RJ03	Juveniles	M	R	25	88	TRUE	0	0.546
	RJ03	Juveniles	M	L	26	89	TRUE	0	2.627
	RJ03	Juveniles	M	L	26	90	FALSE	4.439	5.184
	RJ03	Juveniles	M	R	27	91	TRUE	0	1.592
	RJ03	Juveniles	M	R	27	92	FALSE	6.187	6.945
	RJ03	Juveniles	M	R	27	93	FALSE	6.998	7.237
	RJ03	Juveniles	M	L	28	94	TRUE	0	0.167
	RJ03	Juveniles	M	L	28	95	FALSE	1.88	5.583
	RJ03	Juveniles	M	L	28	96	FALSE	10.32	10.846
	RJ03	Juveniles	M	L	28	97	FALSE	11.512	12.069
	RJ03	Juveniles	M	L	28	98	FALSE	53.972	54.487
	RJ03	Juveniles	M	R	29	99	TRUE	0	2.202
	RJ03	Juveniles	M	R	29	100	FALSE	4.766	5.111
	RJ03	Juveniles	M	R	29	101	FALSE	22.139	23.127
	RJ03	Juveniles	M	L	30	102	TRUE	0	2.119
	RJ03	Juveniles	M	L	30	103	FALSE	210.673	211.643
	RJ03	Juveniles	M	L	30	104	FALSE	229.439	230.29
	RJ03	Juveniles	M	L	30	105	FALSE	303.538	303.803
	RJ03	Juveniles	M	L	30	106	FALSE	314.28	314.675
	RJ03	Juveniles	M	L	30	107	FALSE	340.228	340.466
	RJ03	Juveniles	M	L	30	108	FALSE	568.547	569.203
	RJ03	Juveniles	M	L	30	109	FALSE	570.076	570.858
	RJ03	Juveniles	M	L	30	110	FALSE	573.33	573.673
	RJ03	Juveniles	M	L	30	111	FALSE	574.752	575.431
	RJ03	Juveniles	M	L	30	112	FALSE	579.464	580.495
	RJ04	Juveniles	M	L	1	1	TRUE	0	0.278
	RJ04	Juveniles	M	R	2	2	TRUE	0	7.931
	RJ04	Juveniles	M	R	2	3	FALSE	8.277	8.718
	RJ04	Juveniles	M	R	2	4	FALSE	9.08	9.732
	RJ04	Juveniles	M	L	3	5	TRUE	0	6.557
	RJ04	Juveniles	M	L	3	6	FALSE	7.274	8.529
	RJ04	Juveniles	M	L	3	7	FALSE	11.137	11.618
	RJ04	Juveniles	M	L	3	8	FALSE	27.197	27.743
	RJ04	Juveniles	M	L	3	9	FALSE	28.101	29.278
	RJ04	Juveniles	M	R	4	10	TRUE	0	3.335
	RJ04	Juveniles	M	R	4	11	FALSE	3.835	4.106
	RJ04	Juveniles	M	L	5	12	TRUE	0	1.226
	RJ04	Juveniles	M	R	6	13	TRUE	0	0.974
	RJ04	Juveniles	M	R	6	14	TRUE	2.902	6.625
	RJ04	Juveniles	M	R	6	15	FALSE	7.188	7.578
	RJ04	Juveniles	M	R	6	16	FALSE	8.117	9.382
	RJ04	Juveniles	M	R	6	17	FALSE	24.189	24.874
	RJ04	Juveniles	M	R	6	18	FALSE	32.014	32.631
	RJ04	Juveniles	M	L	7	19	TRUE	0	2.235
	RJ04	Juveniles	M	L	7	20	FALSE	2.846	3.517
	RJ04	Juveniles	M	L	7	21	FALSE	7.433	8.59
	RJ04	Juveniles	M	R	8	22	TRUE	0	0.124
	RJ04	Juveniles	M	R	8	23	FALSE	0.196	0.479
	RJ04	Juveniles	M	R	8	24	FALSE	0.906	2.525
	RJ04	Juveniles	M	L	9	25	TRUE	0	0.121
	RJ04	Juveniles	M	R	10	26	TRUE	0	4.875
	RJ04	Juveniles	M	R	10	27	FALSE	5.282	6.05
	RJ04	Juveniles	M	R	10	28	FALSE	11.919	12.976
	RJ04	Juveniles	M	R	10	29	FALSE	13.158	14.221
	RJ04	Juveniles	M	R	10	30	FALSE	23.751	24.448
	RJ04	Juveniles	M	R	10	31	FALSE	24.871	25.107
	RJ04	Juveniles	M	R	10	32	FALSE	27.656	27.779
	RJ04	Juveniles	M	R	10	33	FALSE	27.939	28.971
	RJ04	Juveniles	M	L	11	34	TRUE	0	1.547
	RJ04	Juveniles	M	L	11	35	FALSE	1.637	2.887
	RJ04	Juveniles	M	L	11	36	FALSE	3.271	3.691
	RJ04	Juveniles	M	L	11	37	FALSE	10.621	11.549
	RJ04	Juveniles	M	R	12	38	TRUE	0	3.675
	RJ04	Juveniles	M	R	12	39	TRUE	22.585	24.796
	RJ04	Juveniles	M	R	12	40	TRUE	24.861	29.967
	RJ04	Juveniles	M	R	12	41	FALSE	30.168	30.331
	RJ04	Juveniles	M	R	12	42	FALSE	32.034	33.668
	RJ04	Juveniles	M	R	12	43	FALSE	34.792	35.395
	RJ04	Juveniles	M	R	12	44	FALSE	36.91	38.109
	RJ04	Juveniles	M	R	12	45	FALSE	41.146	41.719
	RJ04	Juveniles	M	L	13	46	TRUE	0	3.139
	RJ04	Juveniles	M	L	13	47	FALSE	3.366	3.98
	RJ04	Juveniles	M	L	13	48	FALSE	4.395	5.718
	RJ04	Juveniles	M	L	13	49	FALSE	6.109	6.626
	RJ04	Juveniles	M	L	13	50	FALSE	9.127	9.97
	RJ04	Juveniles	M	L	13	51	FALSE	22.337	23.28
	RJ04	Juveniles	M	L	13	52	FALSE	25.645	26.312
	RJ04	Juveniles	M	L	13	53	FALSE	26.537	26.997
	RJ04	Juveniles	M	R	14	54	TRUE	0	2.629
	RJ04	Juveniles	M	R	14	55	FALSE	5.17	6.719
	RJ04	Juveniles	M	R	14	56	FALSE	10.938	11.676
	RJ04	Juveniles	M	L	15	57	TRUE	0	2.89
	RJ04	Juveniles	M	L	15	58	FALSE	3.919	4.309
	RJ04	Juveniles	M	L	15	59	FALSE	9.636	11.69
	RJ04	Juveniles	M	L	15	60	FALSE	20.798	21.357
	RJ04	Juveniles	M	R	16	61	TRUE	0	3.665
	RJ04	Juveniles	M	R	16	62	FALSE	4.188	4.81
	RJ04	Juveniles	M	R	16	63	FALSE	8.066	9.242
	RJ04	Juveniles	M	R	16	64	FALSE	19.969	20.649
	RJ04	Juveniles	M	L	17	65	TRUE	0	2.308
	RJ04	Juveniles	M	L	17	66	FALSE	3.125	4.689
	RJ04	Juveniles	M	L	17	67	FALSE	7.605	8.296
	RJ04	Juveniles	M	R	18	68	TRUE	0	1.013
	RJ04	Juveniles	M	L	19	69	TRUE	0	1.814
	RJ04	Juveniles	M	L	19	70	FALSE	3.552	4.45
	RJ04	Juveniles	M	L	19	71	FALSE	8.325	12.263
	RJ04	Juveniles	M	L	19	72	FALSE	13.412	14.768
	RJ04	Juveniles	M	R	20	73	TRUE	0	4.573
	RJ04	Juveniles	M	R	20	74	FALSE	20.019	21.416
	RJ04	Juveniles	M	R	20	75	FALSE	29.598	30.563
	RJ04	Juveniles	M	L	21	76	TRUE	0	1.252
	RJ04	Juveniles	M	L	21	77	FALSE	16.159	17.014
	RJ04	Juveniles	M	L	21	78	FALSE	17.089	17.202
	RJ04	Juveniles	M	L	21	79	FALSE	17.602	18.676
	RJ04	Juveniles	M	L	21	80	FALSE	19.12	19.567
	RJ04	Juveniles	M	R	22	81	TRUE	0	1.058
	RJ04	Juveniles	M	R	22	82	FALSE	4.891	5.629
	RJ04	Juveniles	M	L	23	83	TRUE	0	4.637
	RJ04	Juveniles	M	L	23	84	FALSE	6.956	7.456
	RJ04	Juveniles	M	L	23	85	FALSE	30.854	32.016
	RJ04	Juveniles	M	R	24	86	TRUE	0	3.085
	RJ04	Juveniles	M	R	24	87	FALSE	5.781	7.001
	RJ04	Juveniles	M	R	24	88	FALSE	25.475	26.927
	RJ04	Juveniles	M	R	24	89	FALSE	28.772	29.557
	RJ04	Juveniles	M	R	24	90	FALSE	29.889	30.47
	RJ04	Juveniles	M	L	25	91	TRUE	0	2.434
	RJ04	Juveniles	M	L	25	92	FALSE	2.477	3.358
	RJ04	Juveniles	M	L	25	93	FALSE	6.727	7.662
	RJ04	Juveniles	M	R	26	94	TRUE	0	0.794
	RJ04	Juveniles	M	R	26	95	FALSE	4.004	4.744
	RJ04	Juveniles	M	R	26	96	FALSE	14.088	14.694
	RJ04	Juveniles	M	L	27	97	TRUE	0	2.516
	RJ04	Juveniles	M	L	27	98	FALSE	4.657	9.611
	RJ04	Juveniles	M	L	27	99	FALSE	17.299	18.048
	RJ04	Juveniles	M	R	28	100	TRUE	0	3.037
	RJ04	Juveniles	M	R	28	101	FALSE	3.093	3.421
	RJ04	Juveniles	M	R	28	102	FALSE	4.591	5.638
	RJ04	Juveniles	M	R	28	103	FALSE	6.638	7.597
	RJ04	Juveniles	M	R	28	104	FALSE	14.721	15.661
	RJ04	Juveniles	M	L	29	105	TRUE	0	1.238
	RJ04	Juveniles	M	L	29	106	FALSE	5.376	5.79
	RJ04	Juveniles	M	R	30	107	TRUE	0	3.423
	RJ04	Juveniles	M	R	30	108	FALSE	4.254	4.78
	RJ04	Juveniles	M	L	31	109	TRUE	0	2.636
	RJ04	Juveniles	M	R	32	110	FALSE	0	1.312
	RJ04	Juveniles	M	R	32	111	FALSE	9.843	10.511
	RJ04	Juveniles	M	R	32	112	FALSE	20.452	21.887
	RJ04	Juveniles	M	R	32	113	FALSE	25.314	26.954
	RJ04	Juveniles	M	R	32	114	FALSE	29.256	29.721
	RJ04	Juveniles	M	L	33	115	TRUE	0	3.189
	RJ04	Juveniles	M	L	33	116	FALSE	3.862	4.1
	RJ04	Juveniles	M	L	33	117	FALSE	4.493	4.946
	RJ04	Juveniles	M	L	33	118	FALSE	6.635	7.311
	RJ04	Juveniles	M	L	33	119	FALSE	9.812	10.993
	RJ04	Juveniles	M	L	33	120	FALSE	15.399	16.274
	RJ04	Juveniles	M	R	34	121	TRUE	0	2.396
	RJ04	Juveniles	M	R	34	122	FALSE	4.27	5.319
	RJ04	Juveniles	M	R	34	123	FALSE	8.362	8.818
	RJ04	Juveniles	M	R	34	124	FALSE	9.102	9.264
	RJ04	Juveniles	M	R	34	125	FALSE	13.901	14.461
	RJ04	Juveniles	M	R	34	126	FALSE	19.535	20.622
	RJ04	Juveniles	M	L	35	127	TRUE	0	2.311
	RJ04	Juveniles	M	L	35	128	FALSE	5.243	6.127
	RJ04	Juveniles	M	L	35	129	FALSE	14.98	15.83
	RJ04	Juveniles	M	L	35	130	FALSE	26.506	27.336
	RJ04	Juveniles	M	R	36	131	TRUE	0	4.206
	RJ04	Juveniles	M	R	36	132	FALSE	7.171	7.669
	RJ04	Juveniles	M	L	37	133	TRUE	0	1.722
	RJ04	Juveniles	M	R	38	134	TRUE	0	3.717
	RJ04	Juveniles	M	R	38	135	TRUE	11.782	14.649
	RJ04	Juveniles	M	R	38	136	FALSE	16.068	17.052
	RJ04	Juveniles	M	L	39	137	TRUE	0	2.208
	RJ04	Juveniles	M	L	39	138	FALSE	3.439	3.682
	RJ04	Juveniles	M	R	40	139	TRUE	0	2.479
	RJ04	Juveniles	M	R	40	140	FALSE	2.817	3.082
	RJ04	Juveniles	M	R	40	141	FALSE	4.043	4.477
	RJ04	Juveniles	M	R	40	142	FALSE	6.55	7.672
	RJ04	Juveniles	M	L	41	143	TRUE	0	1.851
	RJ04	Juveniles	M	L	41	144	FALSE	2.93	5.392
	RJ04	Juveniles	M	R	42	145	TRUE	0	2.587
	RJ04	Juveniles	M	R	42	146	TRUE	3.473	5.749
	RJ04	Juveniles	M	R	42	147	FALSE	6.134	6.94
	RJ04	Juveniles	M	R	42	148	FALSE	7.764	8.431
	RJ04	Juveniles	M	L	43	149	TRUE	0	1.938
	RJ04	Juveniles	M	R	44	150	TRUE	0	1.793
	RJ04	Juveniles	M	R	44	151	FALSE	2.367	2.627
	RJ04	Juveniles	M	R	44	152	FALSE	3.456	4.072
	RJ04	Juveniles	M	R	44	153	FALSE	9.234	9.973
	RJ04	Juveniles	M	L	45	154	TRUE	0	1.854
	RJ04	Juveniles	M	L	45	155	FALSE	3.494	3.941
	RJ04	Juveniles	M	L	45	156	FALSE	7.171	8.003
	RJ04	Juveniles	M	R	46	157	TRUE	0	1.953
	RJ04	Juveniles	M	L	47	158	TRUE	0	1.57
	RJ04	Juveniles	M	L	47	159	FALSE	3.253	4.055
	RJ04	Juveniles	M	R	48	160	TRUE	0	1.888
	RJ04	Juveniles	M	R	48	161	FALSE	1.905	2.263
	RJ04	Juveniles	M	R	48	162	FALSE	2.675	3.106
	RJ04	Juveniles	M	R	48	163	FALSE	4.4	4.73
	RJ04	Juveniles	M	L	49	164	TRUE	0	1.689
	RJ04	Juveniles	M	L	49	165	FALSE	3.549	4.015
	RJ04	Juveniles	M	R	50	166	TRUE	0	2.007
	RJ04	Juveniles	M	R	50	167	FALSE	5.868	6.711
	RJ04	Juveniles	M	R	50	168	FALSE	10.821	11.427
	RJ04	Juveniles	M	L	51	169	TRUE	0	1.415
	RJ04	Juveniles	M	R	52	170	TRUE	0	1.573
	RJ04	Juveniles	M	R	52	171	FALSE	5.73	6.334
	RJ04	Juveniles	M	L	53	172	TRUE	0	1.718
	RJ04	Juveniles	M	L	53	173	FALSE	3.308	3.828
	RJ04	Juveniles	M	L	53	174	FALSE	7.032	7.713
	RJ04	Juveniles	M	R	54	175	TRUE	0	1.769
	RJ04	Juveniles	M	L	55	176	TRUE	0	1.28
	RJ04	Juveniles	M	R	56	177	TRUE	0	2.558
	RJ04	Juveniles	M	R	56	178	TRUE	5.036	6.911
	RJ04	Juveniles	M	L	57	179	TRUE	0	1.658
	RJ04	Juveniles	M	R	58	180	TRUE	0	1.867
	RJ04	Juveniles	M	R	58	181	FALSE	2.414	3.016
	RJ04	Juveniles	M	R	58	182	FALSE	8.625	9.459
	RJ04	Juveniles	M	L	59	183	TRUE	0	1.395
	RJ04	Juveniles	M	R	60	184	TRUE	0	1.425
	RJ04	Juveniles	M	R	60	185	FALSE	1.953	2.268
	RJ04	Juveniles	M	R	60	186	FALSE	2.375	2.575
	RJ04	Juveniles	M	R	60	187	FALSE	5.412	6.249
	RJ04	Juveniles	M	L	61	188	TRUE	0	1.56
	RJ04	Juveniles	M	L	61	189	FALSE	3.735	4.274
	RJ04	Juveniles	M	L	61	190	FALSE	5.011	6.17
	RJ04	Juveniles	M	R	62	191	TRUE	0	1.843
	RJ04	Juveniles	M	L	63	192	TRUE	0	1.868
	RJ04	Juveniles	M	L	63	193	FALSE	5.061	5.981
	RJ04	Juveniles	M	R	64	194	TRUE	0	1.716
	RJ04	Juveniles	M	L	65	195	TRUE	0	0.709
	RJ04	Juveniles	M	R	66	196	TRUE	0	1.917
	RJ04	Juveniles	M	R	66	197	FALSE	2.711	3.458
	RJ04	Juveniles	M	L	67	198	TRUE	0	1.421
	RJ04	Juveniles	M	R	68	199	TRUE	0	0.808
	RJ04	Juveniles	M	R	68	200	FALSE	21.762	22.793
	RJ04	Juveniles	M	R	68	201	FALSE	43.35	44.067
	RJ04	Juveniles	M	R	68	202	FALSE	55.616	56.158
	RJ04	Juveniles	M	L	69	203	TRUE	0	1.583
	RJ04	Juveniles	M	L	69	204	FALSE	5.327	5.737
	RJ04	Juveniles	M	L	69	205	FALSE	8.871	9.244
	RJ04	Juveniles	M	L	69	206	FALSE	12.462	12.893
	RJ04	Juveniles	M	L	69	207	FALSE	12.907	13.158
	RJ04	Juveniles	M	R	70	208	TRUE	0	0.563
	RJ04	Juveniles	M	R	70	209	FALSE	5.067	5.364
	RJ04	Juveniles	M	L	71	210	TRUE	0	1.255
	RJ04	Juveniles	M	R	72	211	TRUE	0	1.442
	RJ04	Juveniles	M	L	73	212	TRUE	0	2.15
	RJ04	Juveniles	M	R	74	213	TRUE	0	1.828
	RJ04	Juveniles	M	R	74	214	FALSE	3.247	3.821
	RJ04	Juveniles	M	R	74	215	FALSE	7.648	8.17
	RJ04	Juveniles	M	L	75	216	TRUE	0	1.423
	RJ04	Juveniles	M	L	75	217	FALSE	3.02	3.605
	RJ04	Juveniles	M	R	76	218	TRUE	0	0.625
	RJ04	Juveniles	M	R	76	219	FALSE	4.135	4.508
	RJ04	Juveniles	M	L	77	220	TRUE	0	1.04
	RJ04	Juveniles	M	R	78	221	FALSE	0	0.395
	RJ04	Juveniles	M	L	79	222	TRUE	0	1.558
	RJ04	Juveniles	M	R	80	223	TRUE	0	1.642
	RJ04	Juveniles	M	L	81	224	TRUE	0	1.286
	RJ04	Juveniles	M	L	81	225	TRUE	2.718	4.096
	RJ04	Juveniles	M	R	82	226	TRUE	0	1.454
	RJ04	Juveniles	M	R	82	227	FALSE	1.501	2.123
	RJ04	Juveniles	M	R	82	228	FALSE	3.116	3.498
	RJ04	Juveniles	M	L	83	229	TRUE	0	1.179
	RJ04	Juveniles	M	L	83	230	FALSE	2.887	3.311
	RJ04	Juveniles	M	R	84	231	TRUE	0	1.452
	RJ04	Juveniles	M	R	84	232	FALSE	2.588	2.985
	RJ04	Juveniles	M	R	84	233	FALSE	4.036	4.865
	RJ04	Juveniles	M	L	85	234	TRUE	0	1.165
	RJ04	Juveniles	M	L	85	235	FALSE	10.445	11.25
	RJ04	Juveniles	M	L	85	236	FALSE	16.555	16.96
	RJ04	Juveniles	M	R	86	237	TRUE	0	1.427
	RJ04	Juveniles	M	L	87	238	TRUE	0	1.305
	RJ04	Juveniles	M	R	88	239	TRUE	0	1.116
	RJ04	Juveniles	M	R	88	240	FALSE	1.186	1.384
	RJ04	Juveniles	M	L	89	241	TRUE	0	0.993
	RJ04	Juveniles	M	R	90	242	TRUE	0	1.285
	RJ04	Juveniles	M	R	90	243	FALSE	20.535	21.113
	RJ04	Juveniles	M	R	90	244	FALSE	28.975	29.391
	RJ04	Juveniles	M	L	91	245	TRUE	0	1.162
	RJ04	Juveniles	M	R	92	246	TRUE	0	1.037
	RJ04	Juveniles	M	R	92	247	FALSE	5.886	6.285
	RJ04	Juveniles	M	L	93	248	TRUE	0	0.912
	RJ04	Juveniles	M	R	94	249	TRUE	0	1.46
	RJ04	Juveniles	M	R	94	250	FALSE	2.833	3.238
	RJ04	Juveniles	M	L	95	251	TRUE	0	1.322
	RJ04	Juveniles	M	R	96	252	TRUE	0	1.524
	RJ04	Juveniles	M	R	96	253	FALSE	5.126	5.461
	RJ04	Juveniles	M	L	97	254	TRUE	0	1.517
	RJ04	Juveniles	M	L	97	255	FALSE	11.163	11.592
	RJ04	Juveniles	M	R	98	256	TRUE	0	1.17
	RJ04	Juveniles	M	L	99	257	TRUE	0	1.058
	RJ04	Juveniles	M	R	100	258	TRUE	0	0.833
	RJ04	Juveniles	M	L	101	259	FALSE	0	0.351
	RJ04	Juveniles	M	R	102	260	TRUE	0	0.957
	RJ04	Juveniles	M	L	103	261	TRUE	0	1.167
	RJ04	Juveniles	M	L	103	262	FALSE	14.526	14.899
	RJ04	Juveniles	M	R	104	263	TRUE	0	1.336
	RJ04	Juveniles	M	L	105	264	TRUE	0	0.409
	RJ04	Juveniles	M	R	106	265	FALSE	0	0.391
	RJ04	Juveniles	M	L	107	266	TRUE	0	1.161
	RJ04	Juveniles	M	R	108	267	TRUE	0	1.147
	RJ04	Juveniles	M	L	109	268	TRUE	0	1.152
	RJ04	Juveniles	M	L	109	269	FALSE	6.713	7.086
	RJ04	Juveniles	M	R	110	270	TRUE	0	0.783
	RJ04	Juveniles	M	L	111	271	TRUE	0	1
	RJ04	Juveniles	M	R	112	272	TRUE	0	1.171
	RJ04	Juveniles	M	L	113	273	TRUE	0	0.944
	RJ04	Juveniles	M	L	113	274	FALSE	2.702	2.962
	RJ04	Juveniles	M	L	113	275	FALSE	9.744	10.09
	RJ04	Juveniles	M	R	114	276	TRUE	0	0.728
	RJ04	Juveniles	M	L	115	277	FALSE	0	0.305
	RJ04	Juveniles	M	R	116	278	TRUE	0	0.718
	RJ04	Juveniles	M	L	117	279	TRUE	0	0.785
	RJ04	Juveniles	M	R	118	280	TRUE	0	0.792
	RJ04	Juveniles	M	R	118	281	FALSE	8.72	9.023
	RJ04	Juveniles	M	L	119	282	TRUE	0	0.378
	RJ04	Juveniles	M	L	119	283	FALSE	13.014	13.59
	RJ04	Juveniles	M	R	120	284	TRUE	0	0.476
	RJ04	Juveniles	M	R	120	285	FALSE	29.235	29.553
	RJ04	Juveniles	M	L	121	286	TRUE	0	0.697
	RJ04	Juveniles	M	R	122	287	TRUE	0	0.456
	RJ04	Juveniles	M	R	122	288	FALSE	11.715	12.122
	RJ04	Juveniles	M	R	122	289	FALSE	34.062	34.454
	RJ04	Juveniles	M	R	122	290	FALSE	36.77	37.285
	RJ04	Juveniles	M	L	123	291	TRUE	0	0.207
	RJ04	Juveniles	M	L	123	292	FALSE	15.71	16.205
	RJ04	Juveniles	M	R	124	293	TRUE	0	0.585
	RJ04	Juveniles	M	R	124	294	FALSE	10.215	10.588
	RJ04	Juveniles	M	R	124	295	FALSE	12.781	13.061
	RJ04	Juveniles	M	L	125	296	TRUE	0	0.534
	RJ04	Juveniles	M	L	125	297	FALSE	3.001	3.241
	RJ04	Juveniles	M	R	126	298	TRUE	0	0.725
	RJ04	Juveniles	M	R	126	299	FALSE	13.671	13.991
	RJ04	Juveniles	M	L	127	300	TRUE	0	0.649
	RJ04	Juveniles	M	R	128	301	TRUE	0	0.641
	RJ04	Juveniles	M	R	128	302	FALSE	40.495	40.62
	RJ04	Juveniles	M	R	128	303	FALSE	54.583	54.787
	RJ04	Juveniles	M	R	128	304	FALSE	76.794	76.988
	RJ04	Juveniles	M	R	128	305	FALSE	111.64	112.072
	RJ04	Juveniles	M	L	129	306	TRUE	0	0.484
	RJ04	Juveniles	M	R	130	307	TRUE	0	0.684
	RJ04	Juveniles	M	R	130	308	FALSE	10.168	10.474
	RJ04	Juveniles	M	L	131	309	TRUE	0	0.121
	RJ04	Juveniles	M	R	132	310	FALSE	0	0.31
	RJ04	Juveniles	M	R	132	311	FALSE	61.044	62.056
	RJ04	Juveniles	M	L	133	312	TRUE	0	0.212
	RJ04	Juveniles	M	L	133	313	FALSE	0.392	1.076
	RJ04	Juveniles	M	L	133	314	FALSE	1.179	2.015
	RJ04	Juveniles	M	R	134	315	TRUE	0	0.722
	RJ04	Juveniles	M	R	134	316	FALSE	112.777	113.113
	RJ04	Juveniles	M	L	135	317	TRUE	0	0.812
	RJ04	Juveniles	M	L	135	318	TRUE	101.91	102.383
	RJ04	Juveniles	M	R	136	319	TRUE	0	1.664
	RJ04	Juveniles	M	L	137	320	TRUE	0	0.393
	RJ04	Juveniles	M	L	137	321	FALSE	36.091	36.31
	RJ04	Juveniles	M	R	138	322	TRUE	0	0.376
	RJ04	Juveniles	M	R	138	323	FALSE	1.558	1.956
	RJ04	Juveniles	M	R	138	324	FALSE	13.938	14.257
	RJ04	Juveniles	M	L	139	325	TRUE	0	0.229
	RJ04	Juveniles	M	L	139	326	FALSE	0.625	1.454
	RJ04	Juveniles	M	L	139	327	FALSE	27.262	27.685
	RJ04	Juveniles	M	R	140	328	TRUE	0	0.834
	RJ04	Juveniles	M	L	141	329	TRUE	0	0.308
	RJ04	Juveniles	M	L	141	330	FALSE	5.505	6.259
	RJ04	Juveniles	M	L	141	331	FALSE	379.133	379.382
	RJ05	Juveniles	M	R	1	1	FALSE	0	0.166
	RJ05	Juveniles	M	R	1	2	FALSE	35.156	35.39
	RJ05	Juveniles	M	R	1	3	FALSE	49.537	52.554
	RJ05	Juveniles	M	R	1	4	FALSE	80.269	81.24
	RJ05	Juveniles	M	R	1	5	FALSE	92.649	94.693
	RJ05	Juveniles	M	R	1	6	FALSE	95.963	96.757
	RJ05	Juveniles	M	R	1	7	FALSE	98.161	98.802
	RJ05	Juveniles	M	R	1	8	FALSE	141.263	142.034
	RJ05	Juveniles	M	L	2	9	TRUE	0	0.141
	RJ05	Juveniles	M	L	2	10	TRUE	0.311	7.456
	RJ05	Juveniles	M	L	2	11	FALSE	7.689	8.148
	RJ05	Juveniles	M	L	2	12	FALSE	8.562	10.486
	RJ05	Juveniles	M	L	2	13	FALSE	11.353	12.585
	RJ05	Juveniles	M	L	2	14	FALSE	14.982	15.557
	RJ05	Juveniles	M	L	2	15	FALSE	16.254	17.053
	RJ05	Juveniles	M	R	3	16	TRUE	0	2.755
	RJ05	Juveniles	M	R	3	17	FALSE	3.656	4.241
	RJ05	Juveniles	M	L	4	18	TRUE	0	2.138
	RJ05	Juveniles	M	L	4	19	FALSE	2.413	4.92
	RJ05	Juveniles	M	L	4	20	FALSE	10.353	10.813
	RJ05	Juveniles	M	L	4	21	FALSE	11.621	12.323
	RJ05	Juveniles	M	R	5	22	TRUE	0	0.376
	RJ05	Juveniles	M	R	5	23	FALSE	0.38	1.136
	RJ05	Juveniles	M	R	5	24	FALSE	1.278	3.475
	RJ05	Juveniles	M	R	5	25	FALSE	4.313	5.229
	RJ05	Juveniles	M	R	5	26	FALSE	5.263	7.502
	RJ05	Juveniles	M	R	5	27	FALSE	23.007	23.667
	RJ05	Juveniles	M	R	5	28	FALSE	23.815	24.242
	RJ05	Juveniles	M	L	6	29	TRUE	0	0.126
	RJ05	Juveniles	M	L	6	30	FALSE	0.182	2.675
	RJ05	Juveniles	M	R	7	31	TRUE	0	3.21
	RJ05	Juveniles	M	L	8	32	TRUE	0	2.428
	RJ05	Juveniles	M	L	8	33	FALSE	5.168	5.651
	RJ05	Juveniles	M	L	8	34	FALSE	10.296	11.178
	RJ05	Juveniles	M	L	8	35	FALSE	14.521	14.945
	RJ05	Juveniles	M	R	9	36	TRUE	0	3.665
	RJ05	Juveniles	M	R	9	37	FALSE	3.778	4.317
	RJ05	Juveniles	M	R	9	38	FALSE	4.472	5.248
	RJ05	Juveniles	M	R	9	39	FALSE	6.454	7.242
	RJ05	Juveniles	M	R	9	40	FALSE	9.344	9.92
	RJ05	Juveniles	M	R	9	41	FALSE	10.339	11.307
	RJ05	Juveniles	M	L	10	42	TRUE	0	2.777
	RJ05	Juveniles	M	L	10	43	FALSE	6.763	7.251
	RJ05	Juveniles	M	R	11	44	TRUE	0	3.51
	RJ05	Juveniles	M	R	11	45	TRUE	6.304	9.554
	RJ05	Juveniles	M	R	11	46	FALSE	13.578	16.11
	RJ05	Juveniles	M	L	12	47	TRUE	0	2.252
	RJ05	Juveniles	M	L	12	48	FALSE	7.793	10.191
	RJ05	Juveniles	M	R	13	49	TRUE	0	2.919
	RJ05	Juveniles	M	L	14	50	TRUE	0	0.738
	RJ05	Juveniles	M	L	14	51	FALSE	4.476	5.121
	RJ05	Juveniles	M	R	15	52	TRUE	0	1.479
	RJ05	Juveniles	M	R	15	53	FALSE	1.695	2.156
	RJ05	Juveniles	M	L	16	54	TRUE	0	2.814
	RJ05	Juveniles	M	R	17	55	TRUE	0	4.423
	RJ05	Juveniles	M	R	17	56	FALSE	6.441	7.417
	RJ05	Juveniles	M	L	18	57	TRUE	0	3.283
	RJ05	Juveniles	M	R	19	58	TRUE	0	0.966
	RJ05	Juveniles	M	R	19	59	FALSE	13.751	14.786
	RJ05	Juveniles	M	L	20	60	TRUE	0	2.834
	RJ05	Juveniles	M	L	20	61	TRUE	11.902	14.397
	RJ05	Juveniles	M	L	20	62	FALSE	16.376	17.708
	RJ05	Juveniles	M	L	20	63	FALSE	19.519	19.937
	RJ05	Juveniles	M	R	21	64	TRUE	0	3.53
	RJ05	Juveniles	M	R	21	65	FALSE	4.739	5.261
	RJ05	Juveniles	M	R	21	66	FALSE	5.522	5.819
	RJ05	Juveniles	M	R	21	67	FALSE	17.86	18.834
	RJ05	Juveniles	M	R	21	68	FALSE	19.974	20.334
	RJ05	Juveniles	M	L	22	69	TRUE	0	2.103
	RJ05	Juveniles	M	R	23	70	TRUE	0	2.705
	RJ05	Juveniles	M	L	24	71	TRUE	0	2.867
	RJ05	Juveniles	M	L	24	72	FALSE	5.364	6.07
	RJ05	Juveniles	M	R	25	73	TRUE	0	2.256
	RJ05	Juveniles	M	L	26	74	TRUE	0	2.434
	RJ05	Juveniles	M	L	26	75	FALSE	3.92	4.394
	RJ05	Juveniles	M	R	27	76	TRUE	0	2.695
	RJ05	Juveniles	M	R	27	77	FALSE	4.027	5.674
	RJ05	Juveniles	M	R	27	78	FALSE	11.573	12.811
	RJ05	Juveniles	M	R	27	79	FALSE	15.231	15.602
	RJ05	Juveniles	M	R	27	80	FALSE	15.666	16.429
	RJ05	Juveniles	M	R	27	81	FALSE	19.931	20.857
	RJ05	Juveniles	M	L	28	82	TRUE	0	2.944
	RJ05	Juveniles	M	L	28	83	FALSE	4.451	5.73
	RJ05	Juveniles	M	L	28	84	FALSE	8.137	8.61
	RJ05	Juveniles	M	R	29	85	TRUE	0	2.557
	RJ05	Juveniles	M	R	29	86	FALSE	5.651	6.322
	RJ05	Juveniles	M	L	30	87	TRUE	0	2.085
	RJ05	Juveniles	M	L	30	88	FALSE	4.783	4.972
	RJ05	Juveniles	M	L	30	89	FALSE	5.005	5.636
	RJ05	Juveniles	M	L	30	90	FALSE	9.834	10.387
	RJ05	Juveniles	M	R	31	91	TRUE	0	3.227
	RJ05	Juveniles	M	R	31	92	FALSE	4.327	4.703
	RJ05	Juveniles	M	R	31	93	FALSE	15.198	16.091
	RJ05	Juveniles	M	L	32	94	TRUE	0	2
	RJ05	Juveniles	M	L	32	95	FALSE	5.103	5.928
	RJ05	Juveniles	M	L	32	96	FALSE	11.468	12.338
	RJ05	Juveniles	M	R	33	97	TRUE	0	2.721
	RJ05	Juveniles	M	R	33	98	FALSE	6.144	8.969
	RJ05	Juveniles	M	R	33	99	FALSE	10.4	12.579
	RJ05	Juveniles	M	R	33	100	FALSE	15.325	16.561
	RJ05	Juveniles	M	R	33	101	FALSE	21.161	21.821
	RJ05	Juveniles	M	L	34	102	TRUE	0	3.031
	RJ05	Juveniles	M	L	34	103	FALSE	6.926	7.434
	RJ05	Juveniles	M	R	35	104	TRUE	0	2.801
	RJ05	Juveniles	M	R	35	105	FALSE	3.797	4.017
	RJ05	Juveniles	M	L	36	106	TRUE	0	1.547
	RJ05	Juveniles	M	L	36	107	FALSE	1.681	2.087
	RJ05	Juveniles	M	L	36	108	FALSE	4.484	5.043
	RJ05	Juveniles	M	R	37	109	TRUE	0	4.131
	RJ05	Juveniles	M	R	37	110	FALSE	5.341	6.422
	RJ05	Juveniles	M	L	38	111	TRUE	0	2.346
	RJ05	Juveniles	M	L	38	112	FALSE	6.35	7.033
	RJ05	Juveniles	M	R	39	113	TRUE	0	3.583
	RJ05	Juveniles	M	R	39	114	FALSE	5.303	6.46
	RJ05	Juveniles	M	L	40	115	TRUE	0	1.327
	RJ05	Juveniles	M	L	40	116	FALSE	1.554	2.297
	RJ05	Juveniles	M	L	40	117	FALSE	4.191	4.518
	RJ05	Juveniles	M	R	41	118	TRUE	0	2.461
	RJ05	Juveniles	M	L	42	119	TRUE	0	1.969
	RJ05	Juveniles	M	R	43	120	TRUE	0	3.732
	RJ05	Juveniles	M	R	43	121	FALSE	4.388	5.152
	RJ05	Juveniles	M	L	44	122	TRUE	0	1.648
	RJ05	Juveniles	M	L	44	123	TRUE	1.761	4.965
	RJ05	Juveniles	M	L	44	124	FALSE	8.241	8.837
	RJ05	Juveniles	M	R	45	125	TRUE	0	0.129
	RJ05	Juveniles	M	R	45	126	FALSE	0.175	2.329
	RJ05	Juveniles	M	R	45	127	FALSE	2.351	2.613
	RJ05	Juveniles	M	L	46	128	TRUE	0	0.975
	RJ05	Juveniles	M	R	47	129	TRUE	0	3.004
	RJ05	Juveniles	M	R	47	130	FALSE	3.501	4.329
	RJ05	Juveniles	M	R	47	131	FALSE	7.862	8.629
	RJ05	Juveniles	M	L	48	132	TRUE	0	1.665
	RJ05	Juveniles	M	R	49	133	TRUE	0	2.547
	RJ05	Juveniles	M	L	50	134	TRUE	0	2.294
	RJ05	Juveniles	M	R	51	135	FALSE	0	0.149
	RJ05	Juveniles	M	R	51	136	FALSE	0.272	0.898
	RJ05	Juveniles	M	L	52	137	TRUE	0	0.786
	RJ05	Juveniles	M	R	53	138	TRUE	0	2.596
	RJ05	Juveniles	M	R	53	139	FALSE	11.257	13.481
	RJ05	Juveniles	M	L	54	140	TRUE	0	1.901
	RJ05	Juveniles	M	L	54	141	FALSE	3.509	4.316
	RJ05	Juveniles	M	R	55	142	TRUE	0	2.021
	RJ05	Juveniles	M	R	55	143	FALSE	3.742	4.143
	RJ05	Juveniles	M	L	56	144	TRUE	0	0.508
	RJ05	Juveniles	M	L	56	145	FALSE	14.615	15.501
	RJ05	Juveniles	M	R	57	146	TRUE	0	1.679
	RJ05	Juveniles	M	L	58	147	TRUE	0	2.326
	RJ05	Juveniles	M	L	58	148	FALSE	4.472	4.846
	RJ05	Juveniles	M	R	59	149	TRUE	0	1.888
	RJ05	Juveniles	M	L	60	150	TRUE	0	0.123
	RJ05	Juveniles	M	L	60	151	FALSE	0.354	1.772
	RJ05	Juveniles	M	R	61	152	TRUE	0	0.437
	RJ05	Juveniles	M	R	61	153	FALSE	0.46	1.116
	RJ05	Juveniles	M	L	62	154	TRUE	0	1.828
	RJ05	Juveniles	M	R	63	155	TRUE	0	0.887
	RJ05	Juveniles	M	R	63	156	FALSE	4.79	5.463
	RJ05	Juveniles	M	R	63	157	FALSE	9.737	10.818
	RJ05	Juveniles	M	R	63	158	FALSE	22.005	22.672
	RJ05	Juveniles	M	L	64	159	TRUE	0	1.778
	RJ05	Juveniles	M	L	64	160	FALSE	2.04	2.503
	RJ05	Juveniles	M	L	64	161	FALSE	16.51	16.868
	RJ05	Juveniles	M	L	64	162	FALSE	21.222	21.549
	RJ05	Juveniles	M	L	64	163	FALSE	47.719	48.329
	RJ05	Juveniles	M	R	65	164	TRUE	0	1.545
	RJ05	Juveniles	M	R	65	165	FALSE	14.379	14.875
	RJ05	Juveniles	M	L	66	166	TRUE	0	1.088
	RJ05	Juveniles	M	R	67	167	TRUE	0	0.601
	RJ05	Juveniles	M	L	68	168	TRUE	0	1.737
	RJ05	Juveniles	M	L	68	169	FALSE	8.904	9.224
	RJ05	Juveniles	M	R	69	170	TRUE	0	2.196
	RJ05	Juveniles	M	L	70	171	FALSE	0	0.885
	RJ05	Juveniles	M	R	71	172	TRUE	0	3.067
	RJ05	Juveniles	M	L	72	173	TRUE	0	1.398
	RJ05	Juveniles	M	R	73	174	TRUE	0	2.32
	RJ05	Juveniles	M	L	74	175	FALSE	0	0.61
	RJ05	Juveniles	M	L	74	176	FALSE	4.889	5.272
	RJ05	Juveniles	M	R	75	177	TRUE	0	2.201
	RJ05	Juveniles	M	L	76	178	TRUE	0	1.924
	RJ05	Juveniles	M	R	77	179	TRUE	0	3.436
	RJ05	Juveniles	M	L	78	180	TRUE	0	0.331
	RJ05	Juveniles	M	L	78	181	FALSE	0.791	1.177
	RJ05	Juveniles	M	L	78	182	FALSE	8.727	9.059
	RJ05	Juveniles	M	R	79	183	TRUE	0	2.604
	RJ05	Juveniles	M	L	80	184	TRUE	0	1.647
	RJ05	Juveniles	M	R	81	185	TRUE	0	0.54
	RJ05	Juveniles	M	R	81	186	FALSE	42.451	42.916
	RJ05	Juveniles	M	L	82	187	TRUE	0	1.532
	RJ05	Juveniles	M	L	82	188	FALSE	23.304	23.789
	RJ05	Juveniles	M	L	82	189	FALSE	31.648	31.96
	RJ05	Juveniles	M	R	83	190	TRUE	0	1.974
	RJ05	Juveniles	M	L	84	191	FALSE	0	0.432
	RJ05	Juveniles	M	R	85	192	TRUE	0	0.403
	RJ05	Juveniles	M	R	85	193	FALSE	4.2	4.595
	RJ05	Juveniles	M	L	86	194	TRUE	0	0.124
	RJ05	Juveniles	M	L	86	195	FALSE	0.182	1.766
	RJ05	Juveniles	M	R	87	196	TRUE	0	1.412
	RJ05	Juveniles	M	R	87	197	FALSE	5.009	5.378
	RJ05	Juveniles	M	L	88	198	TRUE	0	1.113
	RJ05	Juveniles	M	L	88	199	FALSE	13.702	14.149
	RJ05	Juveniles	M	L	88	200	FALSE	41.628	41.927
	RJ05	Juveniles	M	L	88	201	FALSE	83.352	83.75
	RJ05	Juveniles	M	L	88	202	FALSE	92.281	92.565
	RJ05	Juveniles	M	R	89	203	TRUE	0	1.986
	RJ05	Juveniles	M	L	90	204	TRUE	0	1.1
	RJ05	Juveniles	M	R	91	205	TRUE	0	1.137
	RJ05	Juveniles	M	L	92	206	TRUE	0	0.83
	RJ05	Juveniles	M	L	92	207	FALSE	15.249	15.606
	RJ05	Juveniles	M	R	93	208	TRUE	0	1.212
	RJ05	Juveniles	M	L	94	209	TRUE	0	0.284
	RJ05	Juveniles	M	R	95	210	FALSE	0	0.37
	RJ05	Juveniles	M	R	95	211	FALSE	12.422	13.129
	RJ05	Juveniles	M	R	95	212	FALSE	36.599	36.858
	RJ05	Juveniles	M	R	95	213	FALSE	58.758	59.558
	RJ05	Juveniles	M	L	96	214	TRUE	0	1.459
	RJ05	Juveniles	M	L	96	215	FALSE	7.81	8.063
	RJ05	Juveniles	M	L	96	216	FALSE	15.122	15.427
	RJ05	Juveniles	M	R	97	217	TRUE	0	1.6
	RJ05	Juveniles	M	L	98	218	TRUE	0	0.59
	RJ05	Juveniles	M	L	98	219	FALSE	34.664	34.932
	RJ05	Juveniles	M	R	99	220	TRUE	0	2.123
	RJ05	Juveniles	M	R	99	221	FALSE	67.914	68.504
	RJ05	Juveniles	M	L	100	222	TRUE	0	1.757
	RJ05	Juveniles	M	R	101	223	TRUE	0	1.489
	RJ05	Juveniles	M	L	102	224	TRUE	0	1.394
	RJ05	Juveniles	M	R	103	225	TRUE	0	1.17
	RJ05	Juveniles	M	R	103	226	FALSE	15.658	16.113
	RJ05	Juveniles	M	R	103	227	FALSE	21.639	21.914
	RJ05	Juveniles	M	L	104	228	TRUE	0	1.385
	RJ05	Juveniles	M	L	104	229	FALSE	3.77	4.025
	RJ05	Juveniles	M	L	104	230	FALSE	13.614	13.885
	RJ05	Juveniles	M	R	105	231	TRUE	0	2.309
	RJ05	Juveniles	M	R	105	232	FALSE	9.257	9.627
	RJ05	Juveniles	M	L	106	233	TRUE	0	1.19
	RJ05	Juveniles	M	R	107	234	TRUE	0	1.427
	RJ05	Juveniles	M	L	108	235	TRUE	0	0.44
	RJ05	Juveniles	M	L	108	236	FALSE	7.843	8.16
	RJ05	Juveniles	M	L	108	237	FALSE	12.531	12.822
	RJ05	Juveniles	M	L	108	238	FALSE	39.996	40.241
	RJ05	Juveniles	M	R	109	239	TRUE	0	1.326
	RJ05	Juveniles	M	R	109	240	TRUE	58.697	59.15
	RJ05	Juveniles	M	R	109	241	TRUE	84.913	86.41
	RJ05	Juveniles	M	L	110	242	TRUE	0	0.853
	RJ05	Juveniles	M	L	110	243	FALSE	10.132	10.447
	RJ05	Juveniles	M	R	111	244	TRUE	0	1.052
	RJ05	Juveniles	M	R	111	245	FALSE	5.056	5.611
	RJ05	Juveniles	M	L	112	246	TRUE	0	1.514
	RJ05	Juveniles	M	L	112	247	FALSE	29.392	29.686
	RJ05	Juveniles	M	L	112	248	FALSE	79.022	79.131
	RJ05	Juveniles	M	L	112	249	FALSE	79.303	79.563
	RJ05	Juveniles	M	R	113	250	TRUE	0	1.47
	RJ05	Juveniles	M	R	113	251	FALSE	6.093	6.78
	RJ05	Juveniles	M	R	113	252	FALSE	111.189	111.499
	RJ05	Juveniles	M	R	113	253	FALSE	154.418	154.748
	RJ05	Juveniles	M	R	113	254	FALSE	178.719	179.061
	RJ05	Juveniles	M	R	113	255	FALSE	251.485	252.37
	RJ05	Juveniles	M	L	114	256	TRUE	0	1.069
	RJ05	Juveniles	M	R	115	257	TRUE	0	1.199
	RJ05	Juveniles	M	L	116	258	TRUE	0	0.339
	RJ05	Juveniles	M	R	117	259	TRUE	0	1.379
	RJ05	Juveniles	M	R	117	260	FALSE	28.529	28.93
	RJ05	Juveniles	M	L	118	261	TRUE	0	1.162
	RJ05	Juveniles	M	L	118	262	FALSE	10.176	10.464
	RJ05	Juveniles	M	R	119	263	TRUE	0	0.929
	RJ05	Juveniles	M	R	119	264	FALSE	53.251	53.535
	RJ05	Juveniles	M	L	120	265	TRUE	0	0.911
	RJ05	Juveniles	M	L	120	266	FALSE	2.355	2.579
	RJ05	Juveniles	M	R	121	267	TRUE	0	1.109
	RJ05	Juveniles	M	L	122	268	TRUE	0	1.342
	RJ05	Juveniles	M	L	122	269	FALSE	20.763	21.238
	RJ05	Juveniles	M	R	123	270	TRUE	0	1.212
	RJ05	Juveniles	M	R	123	271	TRUE	1.538	2.113
	RJ05	Juveniles	M	L	124	272	TRUE	0	1.052
	RJ05	Juveniles	M	L	124	273	TRUE	2.604	2.822
	RJ05	Juveniles	M	L	124	274	FALSE	2.91	4.013
	RJ06	Juveniles	M	R	1	1	FALSE	0	0.375
	RJ06	Juveniles	M	R	1	2	FALSE	66.472	66.72
	RJ06	Juveniles	M	R	1	3	FALSE	66.864	68.267
	RJ06	Juveniles	M	R	1	4	FALSE	69.25	69.926
	RJ06	Juveniles	M	L	2	5	TRUE	0	0.395
	RJ06	Juveniles	M	L	2	6	FALSE	0.416	0.534
	RJ06	Juveniles	M	R	3	7	TRUE	0	0.588
	RJ06	Juveniles	M	L	4	8	TRUE	0	0.195
	RJ06	Juveniles	M	L	4	9	TRUE	1.311	1.413
	RJ06	Juveniles	M	L	4	10	FALSE	1.787	2.121
	RJ06	Juveniles	M	L	4	11	FALSE	2.155	3.646
	RJ06	Juveniles	M	L	4	12	FALSE	3.963	5.224
	RJ06	Juveniles	M	L	4	13	FALSE	6.937	8.286
	RJ06	Juveniles	M	L	4	14	FALSE	10.138	10.34
	RJ06	Juveniles	M	R	5	15	TRUE	0	0.106
	RJ06	Juveniles	M	R	5	16	FALSE	0.344	1.631
	RJ06	Juveniles	M	R	5	17	FALSE	95.549	95.991
	RJ06	Juveniles	M	R	5	18	FALSE	98.89	99.177
	RJ06	Juveniles	M	R	5	19	FALSE	225.746	226.312
	RJ06	Juveniles	M	L	6	20	TRUE	0	0.227
	RJ06	Juveniles	M	L	6	21	TRUE	0.534	1.041
	RJ06	Juveniles	M	L	6	22	FALSE	1.495	2.882
	RJ06	Juveniles	M	L	6	23	FALSE	9.605	9.971
	RJ06	Juveniles	M	L	6	24	FALSE	20.896	21.864
	RJ06	Juveniles	M	R	7	25	TRUE	0	0.506
	RJ06	Juveniles	M	R	7	26	FALSE	3.467	3.807
	RJ06	Juveniles	M	R	7	27	FALSE	4.24	4.804
	RJ06	Juveniles	M	L	8	28	TRUE	0	0.247
	RJ06	Juveniles	M	R	9	29	TRUE	0	1.736
	RJ06	Juveniles	M	R	9	30	FALSE	10.624	10.793
	RJ06	Juveniles	M	L	10	31	TRUE	0	1.642
	RJ06	Juveniles	M	L	10	32	FALSE	5.416	6.421
	RJ06	Juveniles	M	L	10	33	FALSE	9.406	9.901
	RJ06	Juveniles	M	R	11	34	TRUE	0	0.227
	RJ06	Juveniles	M	R	11	35	FALSE	4.231	4.898
	RJ06	Juveniles	M	R	11	36	FALSE	6.664	6.925
	RJ06	Juveniles	M	L	12	37	TRUE	0	1.729
	RJ06	Juveniles	M	L	12	38	FALSE	51.332	52.45
	RJ06	Juveniles	M	L	12	39	FALSE	88.952	90.108
	RJ06	Juveniles	M	R	13	40	TRUE	0	1.602
	RJ06	Juveniles	M	L	14	41	TRUE	0	1.013
	RJ06	Juveniles	M	R	15	42	FALSE	0	0.486
	RJ06	Juveniles	M	L	16	43	TRUE	0	1.897
	RJ06	Juveniles	M	L	16	44	FALSE	9.651	10.464
	RJ06	Juveniles	M	R	17	45	TRUE	0	0.284
	RJ06	Juveniles	M	R	17	46	FALSE	1.054	2.126
	RJ06	Juveniles	M	R	17	47	FALSE	6.276	6.447
	RJ06	Juveniles	M	R	17	48	FALSE	7.167	7.668
	RJ06	Juveniles	M	R	17	49	FALSE	390.665	391.056
	RJ06	Juveniles	M	L	18	50	TRUE	0	1.314
	RJ06	Juveniles	M	L	18	51	FALSE	12.061	13.065
	RJ06	Juveniles	M	L	18	52	FALSE	26.874	26.998
	RJ06	Juveniles	M	L	18	53	FALSE	31.029	31.14
	RJ06	Juveniles	M	R	19	54	TRUE	0	0.185
	RJ06	Juveniles	M	R	19	55	FALSE	0.403	0.541
	RJ06	Juveniles	M	R	19	56	FALSE	0.56	1.237
	RJ06	Juveniles	M	R	19	57	FALSE	5.25	6.256
	RJ06	Juveniles	M	R	19	58	FALSE	7.319	7.788
	RJ06	Juveniles	M	R	19	59	FALSE	11.65	14.321
	RJ06	Juveniles	M	R	19	60	FALSE	14.459	15.188
	RJ06	Juveniles	M	R	19	61	FALSE	18.136	18.813
	RJ06	Juveniles	M	R	19	62	FALSE	27.777	28.523
	RJ06	Juveniles	M	R	19	63	FALSE	31.708	32.35
	RJ06	Juveniles	M	R	19	64	FALSE	32.466	32.619
	RJ06	Juveniles	M	R	19	65	FALSE	32.7	33.399
	RJ06	Juveniles	M	L	20	66	TRUE	0	1.58
	RJ06	Juveniles	M	L	20	67	FALSE	2.496	3.208
	RJ06	Juveniles	M	L	20	68	FALSE	10.904	11.993
	RJ06	Juveniles	M	L	20	69	FALSE	84.33	85.4
	RJ06	Juveniles	M	L	20	70	FALSE	88.296	89.262
	RJ06	Juveniles	M	R	21	71	TRUE	0	1.182
	RJ06	Juveniles	M	R	21	72	FALSE	2.575	2.926
	RJ06	Juveniles	M	L	22	73	TRUE	0	0.689
	RJ06	Juveniles	M	L	22	74	FALSE	90.488	91.321
	RJ06	Juveniles	M	R	23	75	TRUE	0	0.235
	RJ06	Juveniles	M	R	23	76	FALSE	0.404	0.541
	RJ06	Juveniles	M	R	23	77	FALSE	0.578	2.028
	RJ06	Juveniles	M	R	23	78	FALSE	6.655	7.503
	RJ06	Juveniles	M	L	24	79	TRUE	0	1.104
	RJ06	Juveniles	M	L	24	80	FALSE	6.765	7.446
	RJ06	Juveniles	M	R	25	81	TRUE	0	1.027
	RJ06	Juveniles	M	L	26	82	TRUE	0	1.647
	RJ06	Juveniles	M	L	26	83	FALSE	18.624	20.097
	RJ06	Juveniles	M	L	26	84	FALSE	23.761	24.632
	RJ06	Juveniles	M	L	26	85	FALSE	243.76	243.89
	RJ06	Juveniles	M	L	26	86	FALSE	375.737	376.158
	RJ06	Juveniles	M	L	26	87	FALSE	476.623	477.204
	RJ06	Juveniles	M	R	27	88	TRUE	0	0.831
	RJ06	Juveniles	M	R	27	89	FALSE	133.146	133.313
	RJ06	Juveniles	M	L	28	90	TRUE	0	0.769
	RJ06	Juveniles	M	L	28	91	FALSE	2.679	3.149
	RJ06	Juveniles	M	L	28	92	FALSE	14.677	15.04
	RJ06	Juveniles	M	L	28	93	FALSE	544.353	544.541
	RJ06	Juveniles	M	R	29	94	TRUE	0	0.195
	RJ06	Juveniles	M	R	29	95	FALSE	0.34	0.915
	RJ06	Juveniles	M	R	29	96	FALSE	50.057	50.59
	RJ06	Juveniles	M	L	30	97	TRUE	0	1.147
	RJ07	Juveniles	M	L	1	1	FALSE	0	6.441
	RJ07	Juveniles	M	L	1	2	FALSE	14.493	15.523
	RJ07	Juveniles	M	L	1	3	FALSE	15.558	16.363
	RJ07	Juveniles	M	L	1	4	FALSE	20.891	22.223
	RJ07	Juveniles	M	R	2	5	TRUE	0	4.55
	RJ07	Juveniles	M	R	2	6	FALSE	4.612	6.387
	RJ07	Juveniles	M	R	2	7	FALSE	6.658	8.537
	RJ07	Juveniles	M	R	2	8	FALSE	10.448	11.023
	RJ07	Juveniles	M	R	2	9	FALSE	15.461	15.923
	RJ07	Juveniles	M	R	2	10	FALSE	25.393	25.721
	RJ07	Juveniles	M	R	2	11	FALSE	88.731	90.706
	RJ07	Juveniles	M	L	3	12	TRUE	0	0.543
	RJ07	Juveniles	M	R	4	13	TRUE	0	2.133
	RJ07	Juveniles	M	R	4	14	FALSE	2.283	2.762
	RJ07	Juveniles	M	R	4	15	FALSE	4.101	4.974
	RJ07	Juveniles	M	R	4	16	FALSE	6.609	6.902
	RJ07	Juveniles	M	L	5	17	TRUE	0	2.093
	RJ07	Juveniles	M	L	5	18	FALSE	3.515	4.075
	RJ07	Juveniles	M	L	5	19	FALSE	4.624	4.926
	RJ07	Juveniles	M	L	5	20	FALSE	5.478	6.699
	RJ07	Juveniles	M	L	5	21	FALSE	12.622	13.257
	RJ07	Juveniles	M	L	5	22	FALSE	15.956	16.402
	RJ07	Juveniles	M	L	5	23	FALSE	25.298	25.716
	RJ07	Juveniles	M	R	6	24	TRUE	0	2.739
	RJ07	Juveniles	M	R	6	25	FALSE	5.178	5.918
	RJ07	Juveniles	M	R	6	26	FALSE	6.538	7.467
	RJ07	Juveniles	M	R	6	27	FALSE	7.557	7.715
	RJ07	Juveniles	M	R	6	28	FALSE	7.951	8.251
	RJ07	Juveniles	M	R	6	29	FALSE	13.19	13.513
	RJ07	Juveniles	M	R	6	30	FALSE	13.963	15.123
	RJ07	Juveniles	M	L	7	31	TRUE	0	2.382
	RJ07	Juveniles	M	L	7	32	FALSE	2.687	3.644
	RJ07	Juveniles	M	R	8	33	TRUE	0	1.567
	RJ07	Juveniles	M	R	8	34	TRUE	13.336	14.822
	RJ07	Juveniles	M	R	8	35	TRUE	14.878	16.279
	RJ07	Juveniles	M	R	8	36	FALSE	16.329	17.667
	RJ07	Juveniles	M	R	8	37	FALSE	18.97	20.465
	RJ07	Juveniles	M	R	8	38	FALSE	20.692	21.199
	RJ07	Juveniles	M	R	8	39	FALSE	26.133	26.667
	RJ07	Juveniles	M	L	9	40	TRUE	0	1.924
	RJ07	Juveniles	M	R	10	41	TRUE	0	1.701
	RJ07	Juveniles	M	R	10	42	FALSE	1.726	2.16
	RJ07	Juveniles	M	R	10	43	FALSE	2.514	3.693
	RJ07	Juveniles	M	R	10	44	FALSE	12.006	12.607
	RJ07	Juveniles	M	R	10	45	FALSE	17.797	18.248
	RJ07	Juveniles	M	L	11	46	TRUE	0	2.405
	RJ07	Juveniles	M	L	11	47	FALSE	2.539	2.977
	RJ07	Juveniles	M	L	11	48	FALSE	3.566	3.729
	RJ07	Juveniles	M	L	11	49	FALSE	4.454	4.591
	RJ07	Juveniles	M	L	11	50	FALSE	9.652	10.265
	RJ07	Juveniles	M	L	11	51	FALSE	42.677	43.594
	RJ07	Juveniles	M	R	12	52	TRUE	0	1.808
	RJ07	Juveniles	M	L	13	53	TRUE	0	1.732
	RJ07	Juveniles	M	L	13	54	FALSE	1.76	2.69
	RJ07	Juveniles	M	L	13	55	FALSE	3.398	3.835
	RJ07	Juveniles	M	L	13	56	FALSE	3.965	4.734
	RJ07	Juveniles	M	L	13	57	FALSE	6.718	7.154
	RJ07	Juveniles	M	L	13	58	FALSE	7.549	8.261
	RJ07	Juveniles	M	L	13	59	FALSE	10.046	10.32
	RJ07	Juveniles	M	R	14	60	TRUE	0	2.768
	RJ07	Juveniles	M	R	14	61	FALSE	3.086	3.749
	RJ07	Juveniles	M	R	14	62	FALSE	6.961	7.91
	RJ07	Juveniles	M	R	14	63	FALSE	8.023	8.403
	RJ07	Juveniles	M	R	14	64	FALSE	19.427	19.737
	RJ07	Juveniles	M	R	14	65	FALSE	22.022	22.409
	RJ07	Juveniles	M	R	14	66	FALSE	22.736	23.193
	RJ07	Juveniles	M	L	15	67	TRUE	0	2.279
	RJ07	Juveniles	M	L	15	68	FALSE	2.497	2.909
	RJ07	Juveniles	M	L	15	69	FALSE	4.796	5.253
	RJ07	Juveniles	M	R	16	70	TRUE	0	1.668
	RJ07	Juveniles	M	R	16	71	FALSE	3.979	4.45
	RJ07	Juveniles	M	L	17	72	TRUE	0	1.813
	RJ07	Juveniles	M	L	17	73	FALSE	7.364	7.872
	RJ07	Juveniles	M	L	17	74	FALSE	8.616	8.726
	RJ07	Juveniles	M	L	17	75	FALSE	9.728	10.744
	RJ07	Juveniles	M	L	17	76	FALSE	15.469	15.84
	RJ07	Juveniles	M	R	18	77	TRUE	0	2.377
	RJ07	Juveniles	M	R	18	78	FALSE	2.767	3.444
	RJ07	Juveniles	M	R	18	79	FALSE	3.683	4.099
	RJ07	Juveniles	M	L	19	80	TRUE	0	0.392
	RJ07	Juveniles	M	L	19	81	FALSE	0.47	0.902
	RJ07	Juveniles	M	R	20	82	TRUE	0	2.512
	RJ07	Juveniles	M	R	20	83	FALSE	6.585	7.163
	RJ07	Juveniles	M	R	20	84	FALSE	23.564	24.267
	RJ07	Juveniles	M	R	20	85	FALSE	24.68	24.972
	RJ07	Juveniles	M	R	20	86	FALSE	102.76	103.578
	RJ07	Juveniles	M	R	20	87	FALSE	103.724	104.793
	RJ07	Juveniles	M	R	20	88	FALSE	112.883	113.608
	RJ07	Juveniles	M	L	21	89	TRUE	0	3.015
	RJ07	Juveniles	M	R	22	90	TRUE	0	1.935
	RJ07	Juveniles	M	R	22	91	TRUE	2.546	3.719
	RJ07	Juveniles	M	R	22	92	FALSE	3.853	5.113
	RJ07	Juveniles	M	R	22	93	FALSE	6.228	7.091
	RJ07	Juveniles	M	R	22	94	FALSE	8.604	9.847
	RJ07	Juveniles	M	R	22	95	FALSE	12.365	13.102
	RJ07	Juveniles	M	R	22	96	FALSE	15.013	16.011
	RJ07	Juveniles	M	R	22	97	FALSE	17.721	18.363
	RJ07	Juveniles	M	R	22	98	FALSE	35.67	36.531
	RJ07	Juveniles	M	L	23	99	TRUE	0	1.834
	RJ07	Juveniles	M	L	23	100	FALSE	1.997	3.036
	RJ07	Juveniles	M	L	23	101	FALSE	3.763	5.129
	RJ07	Juveniles	M	L	23	102	FALSE	5.208	5.676
	RJ07	Juveniles	M	R	24	103	TRUE	0	1.481
	RJ07	Juveniles	M	R	24	104	FALSE	2.547	3.07
	RJ07	Juveniles	M	L	25	105	TRUE	0	2.622
	RJ07	Juveniles	M	L	25	106	FALSE	3.907	4.417
	RJ07	Juveniles	M	L	25	107	FALSE	7.938	8.366
	RJ07	Juveniles	M	L	25	108	FALSE	14.304	14.866
	RJ07	Juveniles	M	L	25	109	FALSE	26.457	28.603
	RJ07	Juveniles	M	L	25	110	FALSE	29.086	29.207
	RJ07	Juveniles	M	R	26	111	TRUE	0	1.589
	RJ07	Juveniles	M	R	26	112	FALSE	1.673	1.795
	RJ07	Juveniles	M	R	26	113	FALSE	1.829	2.609
	RJ07	Juveniles	M	L	27	114	TRUE	0	2.908
	RJ07	Juveniles	M	L	27	115	FALSE	3.428	4.896
	RJ07	Juveniles	M	R	28	116	TRUE	0	2.551
	RJ07	Juveniles	M	R	28	117	FALSE	10.497	12.047
	RJ07	Juveniles	M	R	28	118	FALSE	23.348	24.397
	RJ07	Juveniles	M	R	28	119	FALSE	24.633	24.934
	RJ07	Juveniles	M	R	28	120	FALSE	26.485	26.786
	RJ07	Juveniles	M	R	28	121	FALSE	27.608	28.002
	RJ07	Juveniles	M	L	29	122	TRUE	0	2.937
	RJ07	Juveniles	M	L	29	123	FALSE	3.951	4.683
	RJ07	Juveniles	M	L	29	124	FALSE	5.186	6.215
	RJ07	Juveniles	M	L	29	125	FALSE	6.679	6.976
	RJ07	Juveniles	M	L	29	126	FALSE	17.285	18.873
	RJ07	Juveniles	M	L	29	127	FALSE	20.842	21.228
	RJ07	Juveniles	M	R	30	128	TRUE	0	3.307
	RJ07	Juveniles	M	R	30	129	FALSE	7.166	7.734
	RJ07	Juveniles	M	L	31	130	TRUE	0	2.666
	RJ07	Juveniles	M	R	32	131	FALSE	0	0.53
	RJ07	Juveniles	M	R	32	132	FALSE	10.955	11.536
	RJ07	Juveniles	M	L	33	133	TRUE	0	2.339
	RJ07	Juveniles	M	R	34	134	TRUE	0	0.108
	RJ07	Juveniles	M	R	34	135	FALSE	0.126	1.295
	RJ07	Juveniles	M	L	35	136	TRUE	0	1.835
	RJ07	Juveniles	M	L	35	137	FALSE	1.924	2.195
	RJ07	Juveniles	M	L	35	138	FALSE	16.086	17.621
	RJ07	Juveniles	M	R	36	139	TRUE	0	2.896
	RJ07	Juveniles	M	R	36	140	FALSE	11.789	13.102
	RJ07	Juveniles	M	R	36	141	FALSE	15.372	15.683
	RJ07	Juveniles	M	R	36	142	FALSE	96.906	97.817
	RJ07	Juveniles	M	L	37	143	TRUE	0	2.619
	RJ07	Juveniles	M	L	37	144	FALSE	3.159	3.806
	RJ07	Juveniles	M	R	38	145	TRUE	0	3.035
	RJ07	Juveniles	M	L	39	146	TRUE	0	2.324
	RJ07	Juveniles	M	L	39	147	FALSE	5.453	5.93
	RJ07	Juveniles	M	L	39	148	FALSE	5.958	6.621
	RJ07	Juveniles	M	R	40	149	TRUE	0	2.666
	RJ07	Juveniles	M	R	40	150	FALSE	3.709	3.88
	RJ07	Juveniles	M	R	40	151	FALSE	3.967	4.425
	RJ07	Juveniles	M	R	40	152	FALSE	7.743	8.485
	RJ07	Juveniles	M	L	41	153	TRUE	0	2.413
	RJ07	Juveniles	M	L	41	154	FALSE	2.752	3.318
	RJ07	Juveniles	M	L	41	155	FALSE	26.181	27.041
	RJ07	Juveniles	M	L	41	156	FALSE	29.108	29.517
	RJ07	Juveniles	M	L	41	157	FALSE	45.358	45.874
	RJ07	Juveniles	M	R	42	158	TRUE	0	2.767
	RJ07	Juveniles	M	R	42	159	FALSE	3.21	3.648
	RJ07	Juveniles	M	R	42	160	FALSE	18.436	19.107
	RJ07	Juveniles	M	R	42	161	FALSE	29.197	29.742
	RJ07	Juveniles	M	L	43	162	TRUE	0	2.719
	RJ07	Juveniles	M	L	43	163	TRUE	3.403	4.281
	RJ07	Juveniles	M	R	44	164	TRUE	0	2.345
	RJ07	Juveniles	M	R	44	165	FALSE	2.751	3.83
	RJ07	Juveniles	M	R	44	166	FALSE	3.897	4.196
	RJ07	Juveniles	M	R	44	167	FALSE	4.988	5.527
	RJ07	Juveniles	M	R	44	168	FALSE	5.973	6.759
	RJ07	Juveniles	M	R	44	169	FALSE	7.048	7.847
	RJ07	Juveniles	M	R	44	170	FALSE	12.576	13.053
	RJ07	Juveniles	M	L	45	171	TRUE	0	3.453
	RJ07	Juveniles	M	L	45	172	FALSE	7.03	7.281
	RJ07	Juveniles	M	L	45	173	FALSE	7.333	8.448
	RJ07	Juveniles	M	R	46	174	TRUE	0	2.437
	RJ07	Juveniles	M	R	46	175	FALSE	3.139	3.765
	RJ07	Juveniles	M	L	47	176	TRUE	0	2.268
	RJ07	Juveniles	M	L	47	177	FALSE	4.106	5.071
	RJ07	Juveniles	M	R	48	178	TRUE	0	1.905
	RJ07	Juveniles	M	R	48	179	FALSE	13.622	14.852
	RJ07	Juveniles	M	R	48	180	FALSE	24.551	25.061
	RJ07	Juveniles	M	R	48	181	FALSE	49.28	50.028
	RJ07	Juveniles	M	R	48	182	FALSE	120.736	121.228
	RJ07	Juveniles	M	L	49	183	TRUE	0	2.063
	RJ07	Juveniles	M	L	49	184	FALSE	4.855	5.124
	RJ07	Juveniles	M	R	50	185	TRUE	0	0.547
	RJ07	Juveniles	M	R	50	186	FALSE	22.115	22.674
	RJ07	Juveniles	M	R	50	187	FALSE	31.297	31.68
	RJ07	Juveniles	M	R	50	188	FALSE	60.111	60.658
	RJ07	Juveniles	M	R	50	189	FALSE	137.65	138.166
	RJ07	Juveniles	M	R	50	190	FALSE	141.561	142.201
	RJ07	Juveniles	M	R	50	191	FALSE	276.375	277.11
	RJ07	Juveniles	M	L	51	192	TRUE	0	1.277
	RJ07	Juveniles	M	L	51	193	FALSE	4.787	5.223
	RJ07	Juveniles	M	L	51	194	FALSE	5.347	5.577
	RJ07	Juveniles	M	R	52	195	TRUE	0	1.799
	RJ07	Juveniles	M	R	52	196	FALSE	6.586	7.073
	RJ07	Juveniles	M	R	52	197	FALSE	53.683	54.336
	RJ07	Juveniles	M	R	52	198	FALSE	59.105	59.68
	RJ07	Juveniles	M	R	52	199	FALSE	59.703	59.867
	RJ07	Juveniles	M	L	53	200	TRUE	0	0.555
	RJ07	Juveniles	M	L	53	201	FALSE	0.578	1.053
	RJ07	Juveniles	M	R	54	202	TRUE	0	1.513
	RJ07	Juveniles	M	R	54	203	FALSE	7.715	9.775
	RJ07	Juveniles	M	L	55	204	TRUE	0	1.633
	RJ07	Juveniles	M	L	55	205	FALSE	1.644	2.125
	RJ07	Juveniles	M	R	56	206	TRUE	0	1.742
	RJ07	Juveniles	M	R	56	207	FALSE	3.411	4.541
	RJ07	Juveniles	M	R	56	208	FALSE	11.164	11.56
	RJ07	Juveniles	M	R	56	209	FALSE	68.585	69.048
	RJ07	Juveniles	M	L	57	210	TRUE	0	1.462
	RJ07	Juveniles	M	L	57	211	FALSE	4.4	4.768
	RJ07	Juveniles	M	R	58	212	TRUE	0	1.553
	RJ07	Juveniles	M	R	58	213	TRUE	210.463	212.317
	RJ07	Juveniles	M	R	58	214	FALSE	213.353	213.799
	RJ07	Juveniles	M	R	58	215	FALSE	214.473	215.117
	RJ07	Juveniles	M	R	58	216	FALSE	219.676	220.047
	RJ07	Juveniles	M	R	58	217	FALSE	220.886	221.126
	RJ07	Juveniles	M	R	58	218	FALSE	252.554	253.269
	RJ07	Juveniles	M	L	59	219	TRUE	0	2.374
	RJ07	Juveniles	M	L	59	220	FALSE	5.882	6.386
	RJ07	Juveniles	M	R	60	221	TRUE	0	2.404
	RJ07	Juveniles	M	R	60	222	FALSE	3.533	4.494
	RJ07	Juveniles	M	L	61	223	TRUE	0	1.881
	RJ07	Juveniles	M	R	62	224	TRUE	0	2.071
	RJ07	Juveniles	M	R	62	225	FALSE	5.09	5.888
	RJ07	Juveniles	M	R	62	226	FALSE	38.086	39.15
	RJ07	Juveniles	M	L	63	227	TRUE	0	1.266
	RJ07	Juveniles	M	L	63	228	FALSE	23.993	24.62
	RJ07	Juveniles	M	L	63	229	FALSE	44.617	45.952
	RJ07	Juveniles	M	L	63	230	FALSE	46.242	46.479
	RJ07	Juveniles	M	R	64	231	TRUE	0	1.905
	RJ07	Juveniles	M	R	64	232	FALSE	66.853	67.578
	RJ07	Juveniles	M	R	64	233	FALSE	81.954	83.014
	RJ07	Juveniles	M	R	64	234	FALSE	86.831	87.185
	RJ07	Juveniles	M	L	65	235	TRUE	0	1.978
	RJ07	Juveniles	M	L	65	236	FALSE	3.525	3.868
	RJ07	Juveniles	M	L	65	237	FALSE	55.091	55.826
	RJ07	Juveniles	M	R	66	238	TRUE	0	1.625
	RJ07	Juveniles	M	L	67	239	TRUE	0	0.122
	RJ07	Juveniles	M	L	67	240	FALSE	0.181	1.085
	RJ07	Juveniles	M	L	67	241	FALSE	4.359	6.075
	RJ07	Juveniles	M	R	68	242	TRUE	0	1.741
	RJ07	Juveniles	M	L	69	243	TRUE	0	0.904
	RJ07	Juveniles	M	R	70	244	TRUE	0	1.854
	RJ07	Juveniles	M	R	70	245	FALSE	4.12	4.914
	RJ07	Juveniles	M	R	70	246	FALSE	9.734	10.401
	RJ07	Juveniles	M	R	70	247	FALSE	10.517	11.021
	RJ07	Juveniles	M	R	70	248	FALSE	34.264	34.757
	RJ07	Juveniles	M	R	70	249	FALSE	36.057	37.128
	RJ07	Juveniles	M	R	70	250	FALSE	39.875	40.758
	RJ07	Juveniles	M	L	71	251	TRUE	0	1.626
	RJ07	Juveniles	M	L	71	252	FALSE	4.677	4.954
	RJ07	Juveniles	M	R	72	253	TRUE	0	0.987
	RJ07	Juveniles	M	L	73	254	TRUE	0	1.015
	RJ07	Juveniles	M	L	73	255	TRUE	8.73	9.128
	RJ07	Juveniles	M	R	74	256	TRUE	0	1.02
	RJ07	Juveniles	M	L	75	257	FALSE	0	0.431
	RJ07	Juveniles	M	L	75	258	FALSE	38.596	39.04
	RJ07	Juveniles	M	L	75	259	FALSE	41.528	41.779
	RJ07	Juveniles	M	R	76	260	TRUE	0	1.457
	RJ07	Juveniles	M	R	76	261	FALSE	6.141	6.658
	RJ07	Juveniles	M	R	76	262	FALSE	12.299	12.952
	RJ07	Juveniles	M	R	76	263	FALSE	20.509	20.911
	RJ07	Juveniles	M	R	76	264	FALSE	180.347	180.844
	RJ07	Juveniles	M	R	76	265	FALSE	223.786	224.135
	RJ07	Juveniles	M	R	76	266	FALSE	243.412	244.046
	RJ07	Juveniles	M	L	77	267	TRUE	0	1.53
	RJ07	Juveniles	M	R	78	268	TRUE	0	0.99
	RJ07	Juveniles	M	R	78	269	FALSE	38.184	38.866
	RJ07	Juveniles	M	R	78	270	FALSE	109.845	110.31
	RJ07	Juveniles	M	R	78	271	FALSE	110.534	110.84
	RJ07	Juveniles	M	R	78	272	FALSE	119.145	119.247
	RJ07	Juveniles	M	R	78	273	FALSE	119.343	120.622
	RJ07	Juveniles	M	L	79	274	TRUE	0	0.182
	RJ07	Juveniles	M	L	79	275	FALSE	0.463	1.398
	RJ07	Juveniles	M	L	79	276	FALSE	1.597	2.003
	RJ07	Juveniles	M	L	79	277	FALSE	4.186	4.432
	RJ07	Juveniles	M	R	80	278	TRUE	0	1.037
	RJ07	Juveniles	M	L	81	279	TRUE	0	0.894
	RJ07	Juveniles	M	R	82	280	FALSE	0	0.624
	RJ07	Juveniles	M	R	82	281	FALSE	11.477	12.736
	RJ08	Juveniles	M	L	1	1	TRUE	0	2.091
	RJ08	Juveniles	M	L	1	2	FALSE	2.531	2.754
	RJ08	Juveniles	M	L	1	3	FALSE	3.202	3.427
	RJ08	Juveniles	M	L	1	4	FALSE	4.016	4.356
	RJ08	Juveniles	M	L	1	5	FALSE	5.089	5.323
	RJ08	Juveniles	M	L	1	6	FALSE	5.882	7.143
	RJ08	Juveniles	M	L	1	7	FALSE	7.374	9.304
	RJ08	Juveniles	M	L	1	8	FALSE	9.383	11.558
	RJ08	Juveniles	M	L	1	9	FALSE	11.855	12.249
	RJ08	Juveniles	M	L	1	10	FALSE	14.591	15.334
	RJ08	Juveniles	M	L	1	11	FALSE	18.466	18.836
	RJ08	Juveniles	M	L	1	12	FALSE	20.023	20.318
	RJ08	Juveniles	M	R	2	13	TRUE	0	2.83
	RJ08	Juveniles	M	R	2	14	FALSE	2.864	8.255
	RJ08	Juveniles	M	R	2	15	FALSE	8.567	9.521
	RJ08	Juveniles	M	L	3	16	TRUE	0	1.151
	RJ08	Juveniles	M	L	3	17	FALSE	3.874	4.522
	RJ08	Juveniles	M	R	4	18	TRUE	0	0.151
	RJ08	Juveniles	M	L	5	19	TRUE	0	0.348
	RJ08	Juveniles	M	R	6	20	TRUE	0	1.745
	RJ08	Juveniles	M	R	6	21	FALSE	1.866	3.873
	RJ08	Juveniles	M	R	6	22	FALSE	4.538	5.132
	RJ08	Juveniles	M	R	6	23	FALSE	8.946	10.496
	RJ08	Juveniles	M	L	7	24	TRUE	0	3.515
	RJ08	Juveniles	M	L	7	25	FALSE	39.603	40.143
	RJ08	Juveniles	M	R	8	26	TRUE	0	1.601
	RJ08	Juveniles	M	L	9	27	FALSE	0	0.491
	RJ08	Juveniles	M	R	10	28	TRUE	0	2.216
	RJ08	Juveniles	M	R	10	29	FALSE	36.74	37.562
	RJ08	Juveniles	M	L	11	30	TRUE	0	1.829
	RJ08	Juveniles	M	L	11	31	FALSE	212.132	212.847
	RJ08	Juveniles	M	R	12	32	TRUE	0	1.974
	RJ08	Juveniles	M	R	12	33	FALSE	19.518	19.914
	RJ08	Juveniles	M	L	13	34	TRUE	0	0.383
	RJ08	Juveniles	M	L	13	35	FALSE	0.418	1.625
	RJ08	Juveniles	M	L	13	36	FALSE	2.7	3.344
	RJ08	Juveniles	M	R	14	37	TRUE	0	1.909
	RJ08	Juveniles	M	R	14	38	FALSE	2.336	2.695
	RJ08	Juveniles	M	R	14	39	FALSE	179.593	179.729
	RJ08	Juveniles	M	R	14	40	FALSE	180.641	180.967
	RJ08	Juveniles	M	L	15	41	TRUE	0	1.483
	RJ08	Juveniles	M	R	16	42	TRUE	0	1.697
	RJ08	Juveniles	M	L	17	43	FALSE	0	0.368
	RJ08	Juveniles	M	R	18	44	TRUE	0	2.64
	RJ08	Juveniles	M	R	18	45	FALSE	3.007	3.557
	RJ08	Juveniles	M	L	19	46	TRUE	0	2.063
	RJ08	Juveniles	M	R	20	47	TRUE	0	2.109
	RJ08	Juveniles	M	R	20	48	FALSE	61.177	62.188
	RJ08	Juveniles	M	L	21	49	TRUE	0	1.441
	RJ08	Juveniles	M	L	21	50	FALSE	4.483	5.308
	RJ08	Juveniles	M	L	21	51	FALSE	19.689	20.311
	RJ08	Juveniles	M	L	21	52	FALSE	25.607	25.78
	RJ08	Juveniles	M	L	21	53	FALSE	26.002	26.878
	RJ08	Juveniles	M	R	22	54	TRUE	0	1.092
	RJ08	Juveniles	M	R	22	55	FALSE	45.491	46.447
	RJ08	Juveniles	M	R	22	56	FALSE	48.064	48.173
	RJ08	Juveniles	M	L	23	57	TRUE	0	0.811
	RJ08	Juveniles	M	R	24	58	TRUE	0	0.303
	RJ08	Juveniles	M	R	24	59	FALSE	1.362	3.484
	RJ08	Juveniles	M	R	24	60	FALSE	7.333	8.004
	RJ08	Juveniles	M	R	24	61	FALSE	16.767	17.239
	RJ08	Juveniles	M	L	25	62	TRUE	0	3.566
	RJ08	Juveniles	M	L	25	63	FALSE	19.926	20.688
	RJ08	Juveniles	M	R	26	64	TRUE	0	1.019
	RJ08	Juveniles	M	L	27	65	TRUE	0	1.182
	RJ08	Juveniles	M	L	27	66	FALSE	4.165	4.541
	RJ08	Juveniles	M	R	28	67	TRUE	0	0.833
	RJ08	Juveniles	M	L	29	68	TRUE	0	0.773
	RJ08	Juveniles	M	R	30	69	TRUE	0	0.218
	RJ08	Juveniles	M	R	30	70	FALSE	3.113	4.079
	RJ08	Juveniles	M	L	31	71	TRUE	0	2.034
	RJ08	Juveniles	M	R	32	72	TRUE	0	0.202
	RJ08	Juveniles	M	R	32	73	FALSE	0.52	1.903
	RJ08	Juveniles	M	L	33	74	TRUE	0	0.478
	RJ08	Juveniles	M	L	33	75	TRUE	0.747	0.894
	RJ08	Juveniles	M	R	34	76	TRUE	0	0.746
	RJ08	Juveniles	M	L	35	77	TRUE	0	1.925
	RJ08	Juveniles	M	L	35	78	FALSE	30.317	31.122
	RJ08	Juveniles	M	L	35	79	FALSE	35.988	36.332
	RJ08	Juveniles	M	R	36	80	TRUE	0	0.902
	RJ08	Juveniles	M	R	36	81	FALSE	78.19	78.786
	RJ08	Juveniles	M	R	36	82	FALSE	131.042	131.641
	RJ08	Juveniles	M	L	37	83	TRUE	0	0.971
	RJ08	Juveniles	M	R	38	84	TRUE	0	0.786
	RJ08	Juveniles	M	L	39	85	TRUE	0	0.619
	RJ08	Juveniles	M	R	40	86	TRUE	0	1.315
	RJ08	Juveniles	M	L	41	87	TRUE	0	0.954
	RJ08	Juveniles	M	R	42	88	TRUE	0	1.097
	RJ08	Juveniles	M	R	42	89	FALSE	12.436	13.326
	RJ08	Juveniles	M	L	43	90	TRUE	0	0.843
	RJ08	Juveniles	M	R	44	91	TRUE	0	1.565
	RJ08	Juveniles	M	L	45	92	TRUE	0	0.843
	RJ08	Juveniles	M	L	45	93	FALSE	1.476	1.698
	RJ08	Juveniles	M	R	46	94	TRUE	0	0.721
	RJ08	Juveniles	M	L	47	95	TRUE	0	1.065
	RJ08	Juveniles	M	L	47	96	FALSE	24.353	25.036
	RJ08	Juveniles	M	L	47	97	FALSE	25.175	25.823
	RJ09	Juveniles	M	R	1	1	TRUE	0	5.791
	RJ09	Juveniles	M	R	1	2	FALSE	7.338	12.091
	RJ09	Juveniles	M	R	1	3	FALSE	12.52	13.339
	RJ09	Juveniles	M	R	1	4	FALSE	15.342	16.329
	RJ09	Juveniles	M	L	2	5	TRUE	0	4.066
	RJ09	Juveniles	M	R	3	6	TRUE	0	0.296
	RJ09	Juveniles	M	R	3	7	FALSE	15.877	16.651
	RJ09	Juveniles	M	R	3	8	FALSE	16.682	17.239
	RJ09	Juveniles	M	L	4	9	TRUE	0	9.025
	RJ09	Juveniles	M	L	4	10	FALSE	30.33	31.666
	RJ09	Juveniles	M	R	5	11	TRUE	0	2.687
	RJ09	Juveniles	M	R	5	12	FALSE	17.666	18.435
	RJ09	Juveniles	M	L	6	13	TRUE	0	1.758
	RJ09	Juveniles	M	L	6	14	FALSE	4.672	5.835
	RJ09	Juveniles	M	L	6	15	FALSE	13.992	14.273
	RJ09	Juveniles	M	R	7	16	TRUE	0	1.2
	RJ09	Juveniles	M	R	7	17	FALSE	2.439	3.515
	RJ09	Juveniles	M	R	7	18	FALSE	4.318	4.474
	RJ09	Juveniles	M	R	7	19	FALSE	4.506	5.412
	RJ09	Juveniles	M	R	7	20	FALSE	6.439	7.033
	RJ09	Juveniles	M	L	8	21	TRUE	0	2.895
	RJ09	Juveniles	M	L	8	22	FALSE	4.549	4.925
	RJ09	Juveniles	M	R	9	23	TRUE	0	1.639
	RJ09	Juveniles	M	R	9	24	FALSE	5.586	6.014
	RJ09	Juveniles	M	L	10	25	TRUE	0	0.189
	RJ09	Juveniles	M	L	10	26	FALSE	0.896	1.012
	RJ09	Juveniles	M	L	10	27	FALSE	1.054	6.408
	RJ09	Juveniles	M	L	10	28	FALSE	37.67	38.07
	RJ09	Juveniles	M	L	10	29	FALSE	42.955	43.695
	RJ09	Juveniles	M	R	11	30	TRUE	0	1.756
	RJ09	Juveniles	M	R	11	31	FALSE	2.466	3.617
	RJ09	Juveniles	M	R	11	32	FALSE	3.788	3.889
	RJ09	Juveniles	M	L	12	33	TRUE	0	0.172
	RJ09	Juveniles	M	L	12	34	FALSE	0.686	0.821
	RJ09	Juveniles	M	L	12	35	FALSE	0.834	5.388
	RJ09	Juveniles	M	L	12	36	FALSE	8.449	9.982
	RJ09	Juveniles	M	L	12	37	FALSE	11.608	12.124
	RJ09	Juveniles	M	L	12	38	FALSE	20.752	20.908
	RJ09	Juveniles	M	L	12	39	FALSE	47.724	48.629
	RJ09	Juveniles	M	R	13	40	TRUE	0	3.112
	RJ09	Juveniles	M	R	13	41	FALSE	4.864	5.252
	RJ09	Juveniles	M	L	14	42	TRUE	0	1.814
	RJ09	Juveniles	M	L	14	43	FALSE	8.913	12.874
	RJ09	Juveniles	M	L	14	44	FALSE	21.174	22.118
	RJ09	Juveniles	M	L	14	45	FALSE	22.793	25.033
	RJ09	Juveniles	M	R	15	46	TRUE	0	3.114
	RJ09	Juveniles	M	L	16	47	TRUE	0	3.882
	RJ09	Juveniles	M	L	16	48	FALSE	5.188	5.581
	RJ09	Juveniles	M	L	16	49	FALSE	19.939	22.337
	RJ09	Juveniles	M	R	17	50	TRUE	0	2.263
	RJ09	Juveniles	M	R	17	51	FALSE	11.121	11.574
	RJ09	Juveniles	M	R	17	52	FALSE	14.391	15.005
	RJ09	Juveniles	M	L	18	53	TRUE	0	2.158
	RJ09	Juveniles	M	L	18	54	FALSE	50.042	51.294
	RJ09	Juveniles	M	R	19	55	TRUE	0	3.065
	RJ09	Juveniles	M	R	19	56	FALSE	9.838	10.383
	RJ09	Juveniles	M	R	19	57	FALSE	29.101	29.52
	RJ09	Juveniles	M	R	19	58	FALSE	60.476	61.036
	RJ09	Juveniles	M	L	20	59	TRUE	0	3.432
	RJ09	Juveniles	M	L	20	60	FALSE	81.547	82.149
	RJ09	Juveniles	M	R	21	61	TRUE	0	3.076
	RJ09	Juveniles	M	R	21	62	TRUE	4.373	6.774
	RJ09	Juveniles	M	R	21	63	FALSE	11.361	11.752
	RJ09	Juveniles	M	R	21	64	FALSE	23.021	23.561
	RJ09	Juveniles	M	L	22	65	TRUE	0	2.824
	RJ09	Juveniles	M	L	22	66	FALSE	8.94	9.408
	RJ09	Juveniles	M	R	23	67	TRUE	0	2.742
	RJ09	Juveniles	M	R	23	68	FALSE	12.543	13.073
	RJ09	Juveniles	M	L	24	69	TRUE	0	3.872
	RJ09	Juveniles	M	L	24	70	FALSE	9.392	10.323
	RJ09	Juveniles	M	R	25	71	TRUE	0	2.028
	RJ09	Juveniles	M	R	25	72	FALSE	2.592	3.498
	RJ09	Juveniles	M	R	25	73	FALSE	12.685	13.246
	RJ09	Juveniles	M	L	26	74	TRUE	0	1.888
	RJ09	Juveniles	M	L	26	75	FALSE	23.888	24.415
	RJ09	Juveniles	M	R	27	76	TRUE	0	1.71
	RJ09	Juveniles	M	R	27	77	FALSE	25.879	26.241
	RJ09	Juveniles	M	L	28	78	TRUE	0	3.085
	RJ09	Juveniles	M	L	28	79	FALSE	9.131	10.612
	RJ09	Juveniles	M	L	28	80	FALSE	56.229	57.031
	RJ09	Juveniles	M	L	28	81	FALSE	76.318	76.838
	RJ09	Juveniles	M	L	28	82	FALSE	99.311	100.178
	RJ09	Juveniles	M	L	28	83	FALSE	108.967	109.165
	RJ09	Juveniles	M	R	29	84	TRUE	0	2.699
	RJ09	Juveniles	M	R	29	85	FALSE	54.768	55.271
	RJ09	Juveniles	M	L	30	86	TRUE	0	1.823
	RJ09	Juveniles	M	R	31	87	TRUE	0	2.017
	RJ09	Juveniles	M	L	32	88	TRUE	0	3.371
	RJ09	Juveniles	M	L	32	89	FALSE	8.781	9.426
	RJ09	Juveniles	M	L	32	90	FALSE	28.809	29.337
	RJ09	Juveniles	M	L	32	91	FALSE	104.194	104.738
	RJ09	Juveniles	M	R	33	92	TRUE	0	1.97
	RJ09	Juveniles	M	L	34	93	TRUE	0	1.448
	RJ09	Juveniles	M	L	34	94	FALSE	2.314	2.471
	RJ09	Juveniles	M	R	35	95	TRUE	0	1.66
	RJ09	Juveniles	M	R	35	96	FALSE	20.224	20.616
	RJ09	Juveniles	M	L	36	97	TRUE	0	1.546
	RJ09	Juveniles	M	L	36	98	FALSE	41.372	42.335
	RJ09	Juveniles	M	L	36	99	FALSE	87.195	87.582
	RJ09	Juveniles	M	R	37	100	TRUE	0	1.782
	RJ09	Juveniles	M	L	38	101	TRUE	0	1.711
	RJ09	Juveniles	M	L	38	102	FALSE	7.843	8.197
	RJ09	Juveniles	M	R	39	103	TRUE	0	1.967
	RJ09	Juveniles	M	R	39	104	FALSE	2.359	3.035
	RJ09	Juveniles	M	R	39	105	FALSE	3.177	3.382
	RJ09	Juveniles	M	L	40	106	TRUE	0	2.181
	RJ09	Juveniles	M	L	40	107	FALSE	34.349	35.638
	RJ09	Juveniles	M	L	40	108	FALSE	38.376	38.662
	RJ09	Juveniles	M	R	41	109	TRUE	0	1.372
	RJ09	Juveniles	M	R	41	110	FALSE	3.834	4.518
	RJ09	Juveniles	M	L	42	111	TRUE	0	1.576
	RJ09	Juveniles	M	R	43	112	TRUE	0	1.801
	RJ09	Juveniles	M	L	44	113	TRUE	0	1.611
	RJ09	Juveniles	M	R	45	114	TRUE	0	1.46
	RJ09	Juveniles	M	L	46	115	TRUE	0	2.432
	RJ09	Juveniles	M	L	46	116	FALSE	20.142	20.696
	RJ09	Juveniles	M	R	47	117	TRUE	0	1.395
	RJ09	Juveniles	M	L	48	118	TRUE	0	4.587
	RJ09	Juveniles	M	L	48	119	FALSE	19.797	20.41
	RJ09	Juveniles	M	L	48	120	FALSE	62.658	63.162
	RJ09	Juveniles	M	R	49	121	TRUE	0	1.709
	RJ09	Juveniles	M	R	49	122	FALSE	3.402	3.81
	RJ09	Juveniles	M	L	50	123	TRUE	0	2.676
	RJ09	Juveniles	M	L	50	124	FALSE	12.117	12.712
	RJ09	Juveniles	M	R	51	125	TRUE	0	1.419
	RJ09	Juveniles	M	R	51	126	FALSE	38.305	38.736
	RJ09	Juveniles	M	L	52	127	TRUE	0	2.052
	RJ09	Juveniles	M	L	52	128	FALSE	82.419	82.842
	RJ09	Juveniles	M	R	53	129	TRUE	0	1.452
	RJ09	Juveniles	M	L	54	130	FALSE	0	0.308
	RJ09	Juveniles	M	L	54	131	FALSE	39.877	40.227
	RJ09	Juveniles	M	R	55	132	TRUE	0	1.843
	RJ09	Juveniles	M	L	56	133	TRUE	0	1.339
	RJ09	Juveniles	M	R	57	134	TRUE	0	0.942
	RJ09	Juveniles	M	R	57	135	FALSE	1.357	1.637
	RJ09	Juveniles	M	L	58	136	TRUE	0	1.324
	RJ09	Juveniles	M	R	59	137	TRUE	0	1.208
	RJ09	Juveniles	M	R	59	138	FALSE	4.745	5.11
	RJ09	Juveniles	M	L	60	139	TRUE	0	0.403
	RJ09	Juveniles	M	R	61	140	FALSE	0	0.461
	RJ09	Juveniles	M	R	61	141	FALSE	29.033	29.466
	RJ09	Juveniles	M	L	62	142	TRUE	0	1.42
	RJ09	Juveniles	M	R	63	143	TRUE	0	1.384
	RJ09	Juveniles	M	R	63	144	FALSE	2.413	2.518
	RJ09	Juveniles	M	L	64	145	TRUE	0	2.185
	RJ09	Juveniles	M	L	64	146	FALSE	16.873	17.311
	RJ09	Juveniles	M	L	64	147	FALSE	70.139	70.504
	RJ09	Juveniles	M	R	65	148	TRUE	0	0.537
	RJ09	Juveniles	M	R	65	149	FALSE	3.423	3.937
	RJ09	Juveniles	M	L	66	150	TRUE	0	2.584
	RJ09	Juveniles	M	L	66	151	FALSE	23.932	24.234
	RJ09	Juveniles	M	R	67	152	TRUE	0	1.574
	RJ09	Juveniles	M	R	67	153	FALSE	48.563	48.948
	RJ09	Juveniles	M	L	68	154	TRUE	0	0.794
	RJ09	Juveniles	M	L	68	155	FALSE	105.865	106.143
	RJ09	Juveniles	M	R	69	156	TRUE	0	0.309
	RJ10	Juveniles	M	R	1	1	TRUE	0	8.306
	RJ10	Juveniles	M	R	1	2	FALSE	8.863	9.608
	RJ10	Juveniles	M	L	2	3	TRUE	0	7.252
	RJ10	Juveniles	M	L	2	4	FALSE	17.605	19.676
	RJ10	Juveniles	M	R	3	5	TRUE	0	0.7
	RJ10	Juveniles	M	R	3	6	TRUE	0.968	1.636
	RJ10	Juveniles	M	L	4	7	FALSE	0	1.246
	RJ10	Juveniles	M	L	4	8	FALSE	1.737	2.193
	RJ10	Juveniles	M	L	4	9	FALSE	2.358	2.754
	RJ10	Juveniles	M	L	4	10	FALSE	80.11	81.712
	RJ10	Juveniles	M	L	4	11	FALSE	141.66	146.079
	RJ10	Juveniles	M	L	4	12	FALSE	146.254	148.921
	RJ10	Juveniles	M	L	4	13	FALSE	148.944	149.115
	RJ10	Juveniles	M	L	4	14	FALSE	149.327	150.081
	RJ10	Juveniles	M	L	4	15	FALSE	153.652	156.076
	RJ10	Juveniles	M	L	4	16	FALSE	212.423	213.152
	RJ10	Juveniles	M	L	4	17	FALSE	214.3	214.619
	RJ10	Juveniles	M	R	5	18	TRUE	0	4.045
	RJ10	Juveniles	M	R	5	19	FALSE	4.258	4.772
	RJ10	Juveniles	M	R	5	20	FALSE	69.302	71.074
	RJ10	Juveniles	M	L	6	21	TRUE	0	3.842
	RJ10	Juveniles	M	L	6	22	TRUE	5.741	7.605
	RJ10	Juveniles	M	L	6	23	FALSE	7.77	8.741
	RJ10	Juveniles	M	L	6	24	FALSE	11.227	13.051
	RJ10	Juveniles	M	R	7	25	TRUE	0	3.661
	RJ10	Juveniles	M	R	7	26	FALSE	3.883	4.246
	RJ10	Juveniles	M	R	7	27	FALSE	5.078	5.815
	RJ10	Juveniles	M	R	7	28	FALSE	6.454	6.741
	RJ10	Juveniles	M	R	7	29	FALSE	6.87	7.475
	RJ10	Juveniles	M	R	7	30	FALSE	8.246	8.565
	RJ10	Juveniles	M	R	7	31	FALSE	8.581	8.699
	RJ10	Juveniles	M	R	7	32	FALSE	16.144	16.798
	RJ10	Juveniles	M	R	7	33	FALSE	65.642	65.953
	RJ10	Juveniles	M	R	7	34	FALSE	66.621	67.108
	RJ10	Juveniles	M	R	7	35	FALSE	67.898	68.278
	RJ10	Juveniles	M	L	8	36	TRUE	0	1.697
	RJ10	Juveniles	M	L	8	37	FALSE	21.487	22.164
	RJ10	Juveniles	M	R	9	38	TRUE	0	2.486
	RJ10	Juveniles	M	R	9	39	FALSE	5.233	6.309
	RJ10	Juveniles	M	R	9	40	FALSE	6.687	7.111
	RJ10	Juveniles	M	R	9	41	FALSE	10.367	10.876
	RJ10	Juveniles	M	L	10	42	TRUE	0	3.203
	RJ10	Juveniles	M	L	10	43	FALSE	16.57	17.534
	RJ10	Juveniles	M	R	11	44	TRUE	0	2.15
	RJ10	Juveniles	M	R	11	45	FALSE	117.05	117.37
	RJ10	Juveniles	M	R	11	46	FALSE	117.511	118.151
	RJ10	Juveniles	M	R	11	47	FALSE	118.617	118.786
	RJ10	Juveniles	M	L	12	48	TRUE	0	2.757
	RJ10	Juveniles	M	L	12	49	FALSE	6.284	9.52
	RJ10	Juveniles	M	L	12	50	FALSE	11.804	14.306
	RJ10	Juveniles	M	L	12	51	FALSE	18.519	19.732
	RJ10	Juveniles	M	L	12	52	FALSE	55.221	56.782
	RJ10	Juveniles	M	R	13	53	TRUE	0	1.976
	RJ10	Juveniles	M	R	13	54	FALSE	3.328	3.87
	RJ10	Juveniles	M	L	14	55	TRUE	0	3.178
	RJ10	Juveniles	M	L	14	56	FALSE	8.36	9.348
	RJ10	Juveniles	M	R	15	57	TRUE	0	0.711
	RJ10	Juveniles	M	L	16	58	TRUE	0	2.892
	RJ10	Juveniles	M	R	17	59	TRUE	0	2.048
	RJ10	Juveniles	M	L	18	60	TRUE	0	2.305
	RJ10	Juveniles	M	L	18	61	FALSE	4.752	5.614
	RJ10	Juveniles	M	L	18	62	FALSE	6.155	6.438
	RJ10	Juveniles	M	R	19	63	TRUE	0	1.829
	RJ10	Juveniles	M	L	20	64	TRUE	0	2.761
	RJ10	Juveniles	M	L	20	65	FALSE	6.565	6.922
	RJ10	Juveniles	M	L	20	66	FALSE	19.83	20.891
	RJ10	Juveniles	M	R	21	67	TRUE	0	3.19
	RJ10	Juveniles	M	L	22	68	TRUE	0	2.995
	RJ10	Juveniles	M	L	22	69	FALSE	3.758	5.162
	RJ10	Juveniles	M	L	22	70	FALSE	5.955	6.805
	RJ10	Juveniles	M	L	22	71	FALSE	26.084	28.023
	RJ10	Juveniles	M	R	23	72	TRUE	0	1.941
	RJ10	Juveniles	M	R	23	73	TRUE	4.996	6.679
	RJ10	Juveniles	M	L	24	74	TRUE	0	0.79
	RJ10	Juveniles	M	L	24	75	FALSE	23.311	24.398
	RJ10	Juveniles	M	L	24	76	FALSE	71.767	72.209
	RJ10	Juveniles	M	L	24	77	FALSE	274.835	275.577
	RJ10	Juveniles	M	L	24	78	FALSE	278.35	278.793
	RJ10	Juveniles	M	R	25	79	TRUE	0	1.721
	RJ10	Juveniles	M	R	25	80	FALSE	2.984	3.587
	RJ10	Juveniles	M	L	26	81	TRUE	0	1.523
	RJ10	Juveniles	M	R	27	82	TRUE	0	1.529
	RJ10	Juveniles	M	R	27	83	FALSE	5.975	6.483
	RJ10	Juveniles	M	R	27	84	FALSE	12.706	13.091
	RJ10	Juveniles	M	L	28	85	TRUE	0	0.956
	RJ10	Juveniles	M	R	29	86	TRUE	0	1.211
	RJ10	Juveniles	M	L	30	87	TRUE	0	1.629
	RJ10	Juveniles	M	L	30	88	FALSE	35.104	36.671
	RJ10	Juveniles	M	L	30	89	FALSE	43.662	43.921
	RJ10	Juveniles	M	R	31	90	TRUE	0	2.181
	RJ10	Juveniles	M	R	31	91	TRUE	9.026	10.417
	RJ10	Juveniles	M	R	31	92	FALSE	67.475	68.25
	RJ10	Juveniles	M	R	31	93	FALSE	68.465	68.752
	RJ10	Juveniles	M	L	32	94	TRUE	0	2.036
	RJ10	Juveniles	M	L	32	95	FALSE	5.82	6.078
	RJ10	Juveniles	M	R	33	96	TRUE	0	1.104
	RJ10	Juveniles	M	R	33	97	FALSE	19.42	20.079
	RJ10	Juveniles	M	L	34	98	TRUE	0	1.826
	RJ10	Juveniles	M	L	34	99	FALSE	16.377	16.665
	RJ10	Juveniles	M	L	34	100	FALSE	46.796	47.385
	RJ10	Juveniles	M	R	35	101	TRUE	0	1.855
	RJ10	Juveniles	M	R	35	102	FALSE	4.892	5.209
	RJ10	Juveniles	M	R	35	103	FALSE	60.601	61.013
	RJ10	Juveniles	M	L	36	104	TRUE	0	0.765
	RJ10	Juveniles	M	R	37	105	TRUE	0	0.559
	RJ10	Juveniles	M	L	38	106	TRUE	0	0.109
	RJ10	Juveniles	M	L	38	107	FALSE	40.67	41.524
	RJ10	Juveniles	M	L	38	108	FALSE	44.307	44.662
	RJ10	Juveniles	M	R	39	109	TRUE	0	1.471
	RJ10	Juveniles	M	L	40	110	TRUE	0	0.924
	RJ10	Juveniles	M	R	41	111	TRUE	0	1.069
	RJ10	Juveniles	M	L	42	112	TRUE	0	1.498
	RJ10	Juveniles	M	L	42	113	FALSE	3.431	4.164
	RJ11	Juveniles	M	L	1	1	TRUE	0	0.203
	RJ11	Juveniles	M	L	1	2	FALSE	0.833	2.341
	RJ11	Juveniles	M	L	1	3	FALSE	2.363	4.217
	RJ11	Juveniles	M	L	1	4	FALSE	4.284	4.711
	RJ11	Juveniles	M	L	1	5	FALSE	8.076	8.525
	RJ11	Juveniles	M	R	2	6	TRUE	0	0.162
	RJ11	Juveniles	M	R	2	7	FALSE	0.48	9.211
	RJ11	Juveniles	M	R	2	8	FALSE	9.564	11.543
	RJ11	Juveniles	M	R	2	9	FALSE	11.844	13.719
	RJ11	Juveniles	M	R	2	10	FALSE	17.772	19.341
	RJ11	Juveniles	M	R	2	11	FALSE	19.652	21.405
	RJ11	Juveniles	M	R	2	12	FALSE	24.632	26.088
	RJ11	Juveniles	M	R	2	13	FALSE	26.42	27.764
	RJ11	Juveniles	M	L	3	14	TRUE	0	2.162
	RJ11	Juveniles	M	L	3	15	FALSE	3.101	3.57
	RJ11	Juveniles	M	R	4	16	TRUE	0	0.195
	RJ11	Juveniles	M	R	4	17	FALSE	0.497	0.645
	RJ11	Juveniles	M	R	4	18	FALSE	0.726	0.888
	RJ11	Juveniles	M	R	4	19	FALSE	1.464	1.904
	RJ11	Juveniles	M	R	4	20	FALSE	2.147	4.15
	RJ11	Juveniles	M	L	5	21	TRUE	0	0.199
	RJ11	Juveniles	M	L	5	22	FALSE	0.228	2.474
	RJ11	Juveniles	M	L	5	23	FALSE	2.721	3.657
[truncated: 7,597 more rows]

## Sheet: Age_TrialData
Pre-processed data	MouseID	Age	Sex	Side	Streak	Num_pokes	LogDuration
	RJ01	Juveniles	M	L	1	4	1.00173
	RJ01	Juveniles	M	R	2	6	1.32693
	RJ01	Juveniles	M	L	3	1	0.281261
	RJ01	Juveniles	M	R	4	1	0.397419
	RJ01	Juveniles	M	L	5	2	1.12343
	RJ01	Juveniles	M	R	6	2	1.60649
	RJ01	Juveniles	M	L	7	3	1.04317
	RJ01	Juveniles	M	R	8	3	1.81597
	RJ01	Juveniles	M	L	9	2	0.70612
	RJ01	Juveniles	M	R	10	1	0.317018
	RJ01	Juveniles	M	L	11	1	0.33626
	RJ01	Juveniles	M	R	12	4	1.40123
	RJ01	Juveniles	M	L	13	3	1.12401
	RJ01	Juveniles	M	R	14	5	1.43726
	RJ01	Juveniles	M	L	15	7	1.50825
	RJ01	Juveniles	M	R	16	1	0.417306
	RJ01	Juveniles	M	L	17	5	0.94176
	RJ01	Juveniles	M	R	18	1	0.197556
	RJ01	Juveniles	M	L	19	3	1.07788
	RJ01	Juveniles	M	R	20	2	0.539327
	RJ01	Juveniles	M	L	21	4	1.43447
	RJ01	Juveniles	M	R	22	1	0.290702
	RJ01	Juveniles	M	L	23	1	0.175222
	RJ01	Juveniles	M	R	24	3	1.40567
	RJ01	Juveniles	M	L	25	3	1.55499
	RJ01	Juveniles	M	R	26	1	0.406881
	RJ01	Juveniles	M	L	27	3	1.1383
	RJ01	Juveniles	M	R	28	2	1.15543
	RJ01	Juveniles	M	L	29	3	0.920645
	RJ01	Juveniles	M	R	30	2	0.548267
	RJ01	Juveniles	M	L	31	2	0.867232
	RJ01	Juveniles	M	R	32	1	0.283301
	RJ01	Juveniles	M	L	33	4	1.7301
	RJ01	Juveniles	M	R	34	1	0.397071
	RJ01	Juveniles	M	L	35	1	0.519434
	RJ01	Juveniles	M	R	36	2	0.367356
	RJ01	Juveniles	M	L	37	1	-0.125518
	RJ01	Juveniles	M	R	38	2	1.06896
	RJ01	Juveniles	M	L	39	3	1.1451
	RJ01	Juveniles	M	R	40	2	1.37473
	RJ01	Juveniles	M	L	41	5	2.13595
	RJ01	Juveniles	M	R	42	1	-0.191789
	RJ01	Juveniles	M	L	43	1	-0.269218
	RJ01	Juveniles	M	R	44	2	0.437275
	RJ01	Juveniles	M	L	45	3	1.21442
	RJ01	Juveniles	M	R	46	2	1.29057
	RJ01	Juveniles	M	L	47	8	1.75504
	RJ01	Juveniles	M	R	48	1	0.391817
	RJ01	Juveniles	M	L	49	2	0.52009
	RJ01	Juveniles	M	R	50	2	0.992333
	RJ01	Juveniles	M	L	51	2	0.747645
	RJ01	Juveniles	M	R	52	2	0.852297
	RJ01	Juveniles	M	L	53	3	1.17038
	RJ01	Juveniles	M	R	54	1	0.268812
	RJ01	Juveniles	M	L	55	1	-0.294136
	RJ01	Juveniles	M	R	56	3	0.669131
	RJ01	Juveniles	M	L	57	1	0.314078
	RJ01	Juveniles	M	R	58	1	0.256477
	RJ01	Juveniles	M	L	59	1	0.330617
	RJ01	Juveniles	M	R	60	1	0.207365
	RJ01	Juveniles	M	L	61	4	1.30185
	RJ01	Juveniles	M	R	62	2	1.29979
	RJ01	Juveniles	M	L	63	5	2.12379
	RJ01	Juveniles	M	R	64	1	0.202761
	RJ01	Juveniles	M	L	65	5	1.99068
	RJ01	Juveniles	M	R	66	1	0.0773679
	RJ01	Juveniles	M	L	67	1	0.23325
	RJ01	Juveniles	M	R	68	1	-0.328827
	RJ01	Juveniles	M	L	69	5	1.49805
	RJ01	Juveniles	M	R	70	1	-0.117475
	RJ01	Juveniles	M	L	71	3	2.01618
	RJ01	Juveniles	M	R	72	1	-0.0177288
	RJ01	Juveniles	M	L	73	2	2.27973
	RJ01	Juveniles	M	R	74	1	0.0232525
	RJ01	Juveniles	M	L	75	2	0.561698
	RJ01	Juveniles	M	R	76	1	-0.0132283
	RJ02	Juveniles	M	R	1	2	0.84677
	RJ02	Juveniles	M	L	2	3	1.07817
	RJ02	Juveniles	M	R	3	3	0.984887
	RJ02	Juveniles	M	L	4	1	0.102777
	RJ02	Juveniles	M	R	5	2	1.43974
	RJ02	Juveniles	M	L	6	8	1.89428
	RJ02	Juveniles	M	R	7	2	1.02963
	RJ02	Juveniles	M	L	8	6	1.59272
	RJ02	Juveniles	M	R	9	5	1.01986
	RJ02	Juveniles	M	L	10	5	0.854731
	RJ02	Juveniles	M	R	11	3	1.26616
	RJ02	Juveniles	M	L	12	7	1.45693
	RJ02	Juveniles	M	R	13	3	0.836324
	RJ02	Juveniles	M	L	14	7	1.2317
	RJ02	Juveniles	M	R	15	2	1.07849
	RJ02	Juveniles	M	L	16	2	0.55279
	RJ02	Juveniles	M	R	17	2	0.493597
	RJ02	Juveniles	M	L	18	1	0.34183
	RJ02	Juveniles	M	R	19	5	1.7366
	RJ02	Juveniles	M	L	20	9	2.19642
	RJ02	Juveniles	M	R	21	5	1.39387
	RJ02	Juveniles	M	L	22	8	1.19033
	RJ02	Juveniles	M	R	23	5	0.949048
	RJ02	Juveniles	M	L	24	4	0.923865
	RJ02	Juveniles	M	R	25	8	1.18727
	RJ02	Juveniles	M	L	26	2	0.685294
	RJ02	Juveniles	M	R	27	1	0.22917
	RJ02	Juveniles	M	L	28	4	1.00117
	RJ02	Juveniles	M	R	29	2	0.872855
	RJ02	Juveniles	M	L	30	3	1.26083
	RJ02	Juveniles	M	R	31	1	0.314289
	RJ02	Juveniles	M	L	32	2	0.504743
	RJ02	Juveniles	M	R	33	1	0.232488
	RJ02	Juveniles	M	L	34	3	0.916401
	RJ02	Juveniles	M	R	35	2	0.556905
	RJ02	Juveniles	M	L	36	5	0.901186
	RJ02	Juveniles	M	R	37	6	1.45108
	RJ02	Juveniles	M	L	38	11	2.14249
	RJ02	Juveniles	M	R	39	2	0.963268
	RJ02	Juveniles	M	L	40	3	1.55461
	RJ02	Juveniles	M	R	41	1	-0.199971
	RJ02	Juveniles	M	L	42	3	0.990028
	RJ02	Juveniles	M	R	43	3	1.77404
	RJ02	Juveniles	M	L	44	11	2.13644
	RJ02	Juveniles	M	R	45	3	1.26734
	RJ02	Juveniles	M	L	46	6	1.72441
	RJ02	Juveniles	M	R	47	1	0.30298
	RJ02	Juveniles	M	L	48	1	0.381837
	RJ02	Juveniles	M	R	49	2	0.942603
	RJ02	Juveniles	M	L	50	5	1.65329
	RJ02	Juveniles	M	R	51	2	0.473487
	RJ02	Juveniles	M	L	52	7	1.57344
	RJ02	Juveniles	M	R	53	9	1.47097
	RJ02	Juveniles	M	L	54	3	0.927781
	RJ02	Juveniles	M	R	55	1	0.345178
	RJ02	Juveniles	M	L	56	6	1.74473
	RJ02	Juveniles	M	R	57	2	0.860158
	RJ02	Juveniles	M	L	58	4	1.2349
	RJ02	Juveniles	M	R	59	6	1.27212
	RJ02	Juveniles	M	L	60	5	1.73324
	RJ02	Juveniles	M	R	61	1	0.232488
	RJ02	Juveniles	M	L	62	3	1.26968
	RJ02	Juveniles	M	R	63	2	1.08343
	RJ02	Juveniles	M	L	64	1	0.212188
	RJ02	Juveniles	M	R	65	1	0.197281
	RJ02	Juveniles	M	L	66	3	0.815644
	RJ02	Juveniles	M	R	67	1	-0.272459
	RJ02	Juveniles	M	L	68	1	0.432809
	RJ02	Juveniles	M	R	69	3	0.625929
	RJ02	Juveniles	M	L	70	4	0.96586
	RJ02	Juveniles	M	R	71	1	0.204391
	RJ02	Juveniles	M	L	72	1	-0.237321
	RJ02	Juveniles	M	R	73	3	1.68793
	RJ02	Juveniles	M	L	74	3	1.35003
	RJ02	Juveniles	M	R	75	2	1.29785
	RJ02	Juveniles	M	L	76	1	-0.995679
	RJ02	Juveniles	M	R	77	4	1.16107
	RJ02	Juveniles	M	L	78	2	0.599883
	RJ02	Juveniles	M	R	79	2	1.04685
	RJ02	Juveniles	M	L	80	1	0.450403
	RJ02	Juveniles	M	R	81	1	0.0195317
	RJ02	Juveniles	M	L	82	4	1.95354
	RJ02	Juveniles	M	R	83	2	1.77783
	RJ02	Juveniles	M	L	84	2	0.12156
	RJ02	Juveniles	M	R	85	4	1.24242
	RJ02	Juveniles	M	L	86	11	1.75093
	RJ02	Juveniles	M	R	87	3	0.895644
	RJ02	Juveniles	M	L	88	7	1.90917
	RJ02	Juveniles	M	R	89	1	0.0370279
	RJ02	Juveniles	M	L	90	2	0.969928
	RJ02	Juveniles	M	R	91	2	0.645127
	RJ02	Juveniles	M	L	92	3	1.56788
	RJ02	Juveniles	M	R	93	1	0.213783
	RJ02	Juveniles	M	L	94	4	1.69281
	RJ02	Juveniles	M	R	95	2	0.861654
	RJ02	Juveniles	M	L	96	7	1.82973
	RJ02	Juveniles	M	R	97	3	1.0029
	RJ02	Juveniles	M	L	98	1	0.215109
	RJ03	Juveniles	M	R	1	3	-0.025028
	RJ03	Juveniles	M	L	2	1	-0.325139
	RJ03	Juveniles	M	R	3	1	-0.269218
	RJ03	Juveniles	M	L	4	2	0.295347
	RJ03	Juveniles	M	R	5	15	2.42239
	RJ03	Juveniles	M	L	6	4	1.31831
	RJ03	Juveniles	M	R	7	2	0.823474
	RJ03	Juveniles	M	L	8	5	1.20333
	RJ03	Juveniles	M	R	9	6	1.25266
	RJ03	Juveniles	M	L	10	4	0.968016
	RJ03	Juveniles	M	R	11	3	0.891928
	RJ03	Juveniles	M	L	12	9	1.27434
	RJ03	Juveniles	M	R	13	3	0.934145
	RJ03	Juveniles	M	L	14	6	2.0189
	RJ03	Juveniles	M	R	15	2	1.121
	RJ03	Juveniles	M	L	16	1	-0.721246
	RJ03	Juveniles	M	R	17	4	1.62232
	RJ03	Juveniles	M	L	18	2	1.57666
	RJ03	Juveniles	M	R	19	2	0.358696
	RJ03	Juveniles	M	L	20	4	1.05511
	RJ03	Juveniles	M	R	21	2	1.79697
	RJ03	Juveniles	M	L	22	1	0.533136
	RJ03	Juveniles	M	R	23	1	-0.0824945
	RJ03	Juveniles	M	L	24	4	1.03161
	RJ03	Juveniles	M	R	25	1	-0.262807
	RJ03	Juveniles	M	L	26	2	0.714665
	RJ03	Juveniles	M	R	27	3	0.859559
	RJ03	Juveniles	M	L	28	5	1.73629
	RJ03	Juveniles	M	R	29	3	1.36412
	RJ03	Juveniles	M	L	30	11	2.7638
	RJ04	Juveniles	M	L	1	1	-0.555955
	RJ04	Juveniles	M	R	2	3	0.988202
	RJ04	Juveniles	M	L	3	5	1.46654
	RJ04	Juveniles	M	R	4	2	0.613419
	RJ04	Juveniles	M	L	5	1	0.0884905
	RJ04	Juveniles	M	R	6	6	1.51363
	RJ04	Juveniles	M	L	7	3	0.933993
	RJ04	Juveniles	M	R	8	3	0.402261
	RJ04	Juveniles	M	L	9	1	-0.917215
	RJ04	Juveniles	M	R	10	8	1.46196
	RJ04	Juveniles	M	L	11	4	1.06254
	RJ04	Juveniles	M	R	12	8	1.62033
	RJ04	Juveniles	M	L	13	8	1.43132
	RJ04	Juveniles	M	R	14	3	1.06729
	RJ04	Juveniles	M	L	15	4	1.32954
	RJ04	Juveniles	M	R	16	4	1.3149
	RJ04	Juveniles	M	L	17	3	0.918869
	RJ04	Juveniles	M	R	18	1	0.00560945
	RJ04	Juveniles	M	L	19	4	1.16932
	RJ04	Juveniles	M	R	20	3	1.4852
	RJ04	Juveniles	M	L	21	5	1.29152
	RJ04	Juveniles	M	R	22	2	0.750431
	RJ04	Juveniles	M	L	23	3	1.50537
	RJ04	Juveniles	M	R	24	5	1.48387
	RJ04	Juveniles	M	L	25	3	0.884342
	RJ04	Juveniles	M	R	26	3	1.16714
	RJ04	Juveniles	M	L	27	3	1.25643
	RJ04	Juveniles	M	R	28	5	1.19482
	RJ04	Juveniles	M	L	29	2	0.762679
	RJ04	Juveniles	M	R	30	2	0.679428
	RJ04	Juveniles	M	L	31	1	0.420945
	RJ04	Juveniles	M	R	32	5	1.47306
	RJ04	Juveniles	M	L	33	6	1.21149
	RJ04	Juveniles	M	R	34	6	1.31433
	RJ04	Juveniles	M	L	35	4	1.43673
	RJ04	Juveniles	M	R	36	2	0.884739
	RJ04	Juveniles	M	L	37	1	0.236033
	RJ04	Juveniles	M	R	38	3	1.23178
	RJ04	Juveniles	M	L	39	2	0.566084
	RJ04	Juveniles	M	R	40	4	0.884909
	RJ04	Juveniles	M	L	41	2	0.73175
	RJ04	Juveniles	M	R	42	4	0.925879
	RJ04	Juveniles	M	L	43	1	0.287354
	RJ04	Juveniles	M	R	44	4	0.998826
	RJ04	Juveniles	M	L	45	3	0.903253
	RJ04	Juveniles	M	R	46	1	0.290702
	RJ04	Juveniles	M	L	47	2	0.607991
	RJ04	Juveniles	M	R	48	4	0.674861
	RJ04	Juveniles	M	L	49	2	0.603686
	RJ04	Juveniles	M	R	50	3	1.05793
	RJ04	Juveniles	M	L	51	1	0.150756
	RJ04	Juveniles	M	R	52	2	0.801678
	RJ04	Juveniles	M	L	53	3	0.887223
	RJ04	Juveniles	M	R	54	1	0.247728
	RJ04	Juveniles	M	L	55	1	0.10721
	RJ04	Juveniles	M	R	56	2	0.839541
	RJ04	Juveniles	M	L	57	1	0.219585
	RJ04	Juveniles	M	R	58	3	0.975845
	RJ04	Juveniles	M	L	59	1	0.144574
	RJ04	Juveniles	M	R	60	4	0.795811
	RJ04	Juveniles	M	L	61	3	0.790285
	RJ04	Juveniles	M	R	62	1	0.265525
	RJ04	Juveniles	M	L	63	2	0.776774
	RJ04	Juveniles	M	R	64	1	0.234517
	RJ04	Juveniles	M	L	65	1	-0.149354
	RJ04	Juveniles	M	R	66	2	0.538825
	RJ04	Juveniles	M	L	67	1	0.152594
	RJ04	Juveniles	M	R	68	4	1.74941
	RJ04	Juveniles	M	L	69	5	1.11919
	RJ04	Juveniles	M	R	70	2	0.729489
	RJ04	Juveniles	M	L	71	1	0.0986437
	RJ04	Juveniles	M	R	72	1	0.158965
	RJ04	Juveniles	M	L	73	1	0.332438
	RJ04	Juveniles	M	R	74	3	0.912222
	RJ04	Juveniles	M	L	75	2	0.556905
	RJ04	Juveniles	M	R	76	2	0.653984
	RJ04	Juveniles	M	L	77	1	0.0170333
	RJ04	Juveniles	M	R	78	1	-0.403403
	RJ04	Juveniles	M	L	79	1	0.192567
	RJ04	Juveniles	M	R	80	1	0.215373
	RJ04	Juveniles	M	L	81	2	0.61236
	RJ04	Juveniles	M	R	82	3	0.54382
	RJ04	Juveniles	M	L	83	2	0.519959
	RJ04	Juveniles	M	R	84	3	0.687083
	RJ04	Juveniles	M	L	85	3	1.22943
	RJ04	Juveniles	M	R	86	1	0.154424
	RJ04	Juveniles	M	L	87	1	0.115611
	RJ04	Juveniles	M	R	88	2	0.141136
	RJ04	Juveniles	M	L	89	1	-0.00305075
	RJ04	Juveniles	M	R	90	3	1.46821
	RJ04	Juveniles	M	L	91	1	0.0652061
	RJ04	Juveniles	M	R	92	2	0.798305
	RJ04	Juveniles	M	L	93	1	-0.0400052
	RJ04	Juveniles	M	R	94	2	0.510277
	RJ04	Juveniles	M	L	95	1	0.121231
	RJ04	Juveniles	M	R	96	2	0.737272
	RJ04	Juveniles	M	L	97	2	1.06416
	RJ04	Juveniles	M	R	98	1	0.0681859
	RJ04	Juveniles	M	L	99	1	0.0244857
	RJ04	Juveniles	M	R	100	1	-0.079355
	RJ04	Juveniles	M	L	101	1	-0.454693
	RJ04	Juveniles	M	R	102	1	-0.0190881
	RJ04	Juveniles	M	L	103	2	1.17316
	RJ04	Juveniles	M	R	104	1	0.125806
	RJ04	Juveniles	M	L	105	1	-0.388277
	RJ04	Juveniles	M	R	106	1	-0.407823
	RJ04	Juveniles	M	L	107	1	0.0648322
	RJ04	Juveniles	M	R	108	1	0.0595634
	RJ04	Juveniles	M	L	109	2	0.850401
	RJ04	Juveniles	M	R	110	1	-0.106238
	RJ04	Juveniles	M	L	111	1	0
	RJ04	Juveniles	M	R	112	1	0.0685569
	RJ04	Juveniles	M	L	113	3	1.00389
	RJ04	Juveniles	M	R	114	1	-0.137869
	RJ04	Juveniles	M	L	115	1	-0.5157
	RJ04	Juveniles	M	R	116	1	-0.143876
	RJ04	Juveniles	M	L	117	1	-0.10513
	RJ04	Juveniles	M	R	118	2	0.955351
	RJ04	Juveniles	M	L	119	2	1.13322
	RJ04	Juveniles	M	R	120	2	1.4706
	RJ04	Juveniles	M	L	121	1	-0.156767
	RJ04	Juveniles	M	R	122	4	1.57153
	RJ04	Juveniles	M	L	123	2	1.20965
	RJ04	Juveniles	M	R	124	3	1.11598
	RJ04	Juveniles	M	L	125	2	0.510679
	RJ04	Juveniles	M	R	126	2	1.14585
	RJ04	Juveniles	M	L	127	1	-0.187755
	RJ04	Juveniles	M	R	128	5	2.0495
	RJ04	Juveniles	M	L	129	1	-0.315155
	RJ04	Juveniles	M	R	130	2	1.02011
	RJ04	Juveniles	M	L	131	1	-0.917215
	RJ04	Juveniles	M	R	132	2	1.79278
	RJ04	Juveniles	M	L	133	3	0.304275
	RJ04	Juveniles	M	R	134	2	2.05351
	RJ04	Juveniles	M	L	135	2	2.01023
	RJ04	Juveniles	M	R	136	1	0.221153
	RJ04	Juveniles	M	L	137	2	1.56003
	RJ04	Juveniles	M	R	138	3	1.15403
	RJ04	Juveniles	M	L	139	3	1.44224
	RJ04	Juveniles	M	R	140	1	-0.0788339
	RJ04	Juveniles	M	L	141	3	2.57908
	RJ05	Juveniles	M	R	1	8	2.15239
	RJ05	Juveniles	M	L	2	7	1.2318
	RJ05	Juveniles	M	R	3	2	0.627468
	RJ05	Juveniles	M	L	4	4	1.09072
	RJ05	Juveniles	M	R	5	7	1.38457
	RJ05	Juveniles	M	L	6	2	0.427324
	RJ05	Juveniles	M	R	7	1	0.506505
	RJ05	Juveniles	M	L	8	4	1.1745
	RJ05	Juveniles	M	R	9	6	1.05335
	RJ05	Juveniles	M	L	10	2	0.860398
	RJ05	Juveniles	M	R	11	3	1.2071
	RJ05	Juveniles	M	L	12	2	1.00822
	RJ05	Juveniles	M	R	13	1	0.465234
	RJ05	Juveniles	M	L	14	2	0.709355
	RJ05	Juveniles	M	R	15	2	0.333649
	RJ05	Juveniles	M	L	16	1	0.449324
	RJ05	Juveniles	M	R	17	2	0.870228
	RJ05	Juveniles	M	L	18	1	0.516271
	RJ05	Juveniles	M	R	19	2	1.16985
	RJ05	Juveniles	M	L	20	4	1.29966
	RJ05	Juveniles	M	R	21	5	1.30822
	RJ05	Juveniles	M	L	22	1	0.322839
	RJ05	Juveniles	M	R	23	1	0.432167
	RJ05	Juveniles	M	L	24	2	0.783189
	RJ05	Juveniles	M	R	25	1	0.353339
	RJ05	Juveniles	M	L	26	2	0.64286
	RJ05	Juveniles	M	R	27	6	1.31925
	RJ05	Juveniles	M	L	28	3	0.935003
	RJ05	Juveniles	M	R	29	2	0.800854
	RJ05	Juveniles	M	L	30	4	1.01649
	RJ05	Juveniles	M	R	31	3	1.20658
	RJ05	Juveniles	M	L	32	3	1.09124
	RJ05	Juveniles	M	R	33	5	1.33887
	RJ05	Juveniles	M	L	34	2	0.871223
	RJ05	Juveniles	M	R	35	2	0.603902
	RJ05	Juveniles	M	L	36	3	0.702689
	RJ05	Juveniles	M	R	37	2	0.80767
	RJ05	Juveniles	M	L	38	2	0.847141
	RJ05	Juveniles	M	R	39	2	0.810233
	RJ05	Juveniles	M	L	40	3	0.654946
	RJ05	Juveniles	M	R	41	1	0.391112
	RJ05	Juveniles	M	L	42	1	0.294246
	RJ05	Juveniles	M	R	43	2	0.711976
	RJ05	Juveniles	M	L	44	3	0.946305
	RJ05	Juveniles	M	R	45	3	0.417139
	RJ05	Juveniles	M	L	46	1	-0.0109954
	RJ05	Juveniles	M	R	47	3	0.93596
	RJ05	Juveniles	M	L	48	1	0.221414
	RJ05	Juveniles	M	R	49	1	0.406029
	RJ05	Juveniles	M	L	50	1	0.360593
	RJ05	Juveniles	M	R	51	2	-0.0467237
	RJ05	Juveniles	M	L	52	1	-0.104577
	RJ05	Juveniles	M	R	53	2	1.12972
	RJ05	Juveniles	M	L	54	2	0.635081
	RJ05	Juveniles	M	R	55	2	0.617315
	RJ05	Juveniles	M	L	56	2	1.19036
	RJ05	Juveniles	M	R	57	1	0.225051
	RJ05	Juveniles	M	L	58	2	0.685383
	RJ05	Juveniles	M	R	59	1	0.276002
	RJ05	Juveniles	M	L	60	2	0.248464
	RJ05	Juveniles	M	R	61	2	0.0476642
	RJ05	Juveniles	M	L	62	1	0.261976
	RJ05	Juveniles	M	R	63	4	1.35549
	RJ05	Juveniles	M	L	64	5	1.68421
	RJ05	Juveniles	M	R	65	2	1.17246
	RJ05	Juveniles	M	L	66	1	0.0366289
	RJ05	Juveniles	M	R	67	1	-0.221126
	RJ05	Juveniles	M	L	68	2	0.964919
	RJ05	Juveniles	M	R	69	1	0.341632
	RJ05	Juveniles	M	L	70	1	-0.0530567
	RJ05	Juveniles	M	R	71	1	0.486714
	RJ05	Juveniles	M	L	72	1	0.145507
	RJ05	Juveniles	M	R	73	1	0.365488
	RJ05	Juveniles	M	L	74	2	0.721975
	RJ05	Juveniles	M	R	75	1	0.34262
	RJ05	Juveniles	M	L	76	1	0.284205
	RJ05	Juveniles	M	R	77	1	0.536053
	RJ05	Juveniles	M	L	78	3	0.95708
	RJ05	Juveniles	M	R	79	1	0.415641
	RJ05	Juveniles	M	L	80	1	0.216694
	RJ05	Juveniles	M	R	81	2	1.63262
	RJ05	Juveniles	M	L	82	3	1.50461
	RJ05	Juveniles	M	R	83	1	0.295347
	RJ05	Juveniles	M	L	84	1	-0.364516
	RJ05	Juveniles	M	R	85	2	0.662286
	RJ05	Juveniles	M	L	86	2	0.246991
	RJ05	Juveniles	M	R	87	2	0.730621
	RJ05	Juveniles	M	L	88	5	1.96645
	RJ05	Juveniles	M	R	89	1	0.297979
	RJ05	Juveniles	M	L	90	1	0.0413927
	RJ05	Juveniles	M	R	91	1	0.0557605
	RJ05	Juveniles	M	L	92	2	1.19329
	RJ05	Juveniles	M	R	93	1	0.0835026
	RJ05	Juveniles	M	L	94	1	-0.546682
	RJ05	Juveniles	M	R	95	4	1.77494
	RJ05	Juveniles	M	L	96	3	1.18828
	RJ05	Juveniles	M	R	97	1	0.20412
	RJ05	Juveniles	M	L	98	2	1.54322
	RJ05	Juveniles	M	R	99	2	1.83572
	RJ05	Juveniles	M	L	100	1	0.244772
	RJ05	Juveniles	M	R	101	1	0.172895
	RJ05	Juveniles	M	L	102	1	0.144263
	RJ05	Juveniles	M	R	103	3	1.34072
	RJ05	Juveniles	M	L	104	3	1.14255
	RJ05	Juveniles	M	R	105	2	0.983491
	RJ05	Juveniles	M	L	106	1	0.075547
	RJ05	Juveniles	M	R	107	1	0.154424
	RJ05	Juveniles	M	L	108	4	1.60467
	RJ05	Juveniles	M	R	109	3	1.93656
	RJ05	Juveniles	M	L	110	2	1.01899
	RJ05	Juveniles	M	R	111	2	0.74904
	RJ05	Juveniles	M	L	112	4	1.90071
	RJ05	Juveniles	M	R	113	6	2.40204
	RJ05	Juveniles	M	L	114	1	0.0289777
	RJ05	Juveniles	M	R	115	1	0.0788192
	RJ05	Juveniles	M	L	116	1	-0.4698
	RJ05	Juveniles	M	R	117	2	1.46135
	RJ05	Juveniles	M	L	118	2	1.0197
	RJ05	Juveniles	M	R	119	2	1.72864
	RJ05	Juveniles	M	L	120	2	0.411451
	RJ05	Juveniles	M	R	121	1	0.0449315
	RJ05	Juveniles	M	L	122	2	1.32711
	RJ05	Juveniles	M	R	123	2	0.324899
	RJ05	Juveniles	M	L	124	3	0.603469
	RJ06	Juveniles	M	R	1	4	1.84464
	RJ06	Juveniles	M	L	2	2	-0.272459
	RJ06	Juveniles	M	R	3	1	-0.230623
	RJ06	Juveniles	M	L	4	7	1.01452
	RJ06	Juveniles	M	R	5	5	2.35471
	RJ06	Juveniles	M	L	6	5	1.33973
	RJ06	Juveniles	M	R	7	3	0.681603
	RJ06	Juveniles	M	L	8	1	-0.607303
	RJ06	Juveniles	M	R	9	2	1.03314
	RJ06	Juveniles	M	L	10	3	0.995679
	RJ06	Juveniles	M	R	11	3	0.84042
	RJ06	Juveniles	M	L	12	3	1.95476
	RJ06	Juveniles	M	R	13	1	0.204663
	RJ06	Juveniles	M	L	14	1	0.00560945
	RJ06	Juveniles	M	R	15	1	-0.313364
	RJ06	Juveniles	M	L	16	2	1.0197
	RJ06	Juveniles	M	R	17	5	2.59224
	RJ06	Juveniles	M	L	18	4	1.49332
	RJ06	Juveniles	M	R	19	12	1.52373
	RJ06	Juveniles	M	L	20	5	1.95067
	RJ06	Juveniles	M	R	21	2	0.466274
	RJ06	Juveniles	M	L	22	2	1.96057
	RJ06	Juveniles	M	R	23	4	0.875235
	RJ06	Juveniles	M	L	24	2	0.871923
	RJ06	Juveniles	M	R	25	1	0.0115704
	RJ06	Juveniles	M	L	26	6	2.6787
	RJ06	Juveniles	M	R	27	2	2.12487
	RJ06	Juveniles	M	L	28	4	2.73603
	RJ06	Juveniles	M	R	29	3	1.70406
	RJ06	Juveniles	M	L	30	1	0.0595634
	RJ07	Juveniles	M	L	1	4	1.3468
	RJ07	Juveniles	M	R	2	7	1.95764
	RJ07	Juveniles	M	L	3	1	-0.2652
	RJ07	Juveniles	M	R	4	4	0.838975
	RJ07	Juveniles	M	L	5	7	1.4102
	RJ07	Juveniles	M	R	6	7	1.17964
	RJ07	Juveniles	M	L	7	2	0.561578
	RJ07	Juveniles	M	R	8	7	1.42597
	RJ07	Juveniles	M	L	9	1	0.284205
	RJ07	Juveniles	M	R	10	5	1.26122
	RJ07	Juveniles	M	L	11	6	1.63943
	RJ07	Juveniles	M	R	12	1	0.257198
	RJ07	Juveniles	M	L	13	7	1.01368
	RJ07	Juveniles	M	R	14	7	1.36536
	RJ07	Juveniles	M	L	15	3	0.720407
	RJ07	Juveniles	M	R	16	2	0.64836
	RJ07	Juveniles	M	L	17	5	1.19976
	RJ07	Juveniles	M	R	18	3	0.612678
	RJ07	Juveniles	M	L	19	2	-0.0447935
	RJ07	Juveniles	M	R	20	7	2.05541
	RJ07	Juveniles	M	L	21	1	0.479287
	RJ07	Juveniles	M	R	22	9	1.56266
	RJ07	Juveniles	M	L	23	4	0.754042
	RJ07	Juveniles	M	R	24	2	0.487138
	RJ07	Juveniles	M	L	25	6	1.46549
	RJ07	Juveniles	M	R	26	3	0.416474
	RJ07	Juveniles	M	L	27	2	0.689841
	RJ07	Juveniles	M	R	28	6	1.44719
	RJ07	Juveniles	M	L	29	6	1.32691
	RJ07	Juveniles	M	R	30	2	0.888404
	RJ07	Juveniles	M	L	31	1	0.42586
	RJ07	Juveniles	M	R	32	2	1.06206
	RJ07	Juveniles	M	L	33	1	0.36903
	RJ07	Juveniles	M	R	34	2	0.11227
	RJ07	Juveniles	M	L	35	3	1.24603
	RJ07	Juveniles	M	R	36	4	1.99041
	RJ07	Juveniles	M	L	37	2	0.580469
	RJ07	Juveniles	M	R	38	1	0.482159
	RJ07	Juveniles	M	L	39	3	0.820924
	RJ07	Juveniles	M	R	40	4	0.928652
	RJ07	Juveniles	M	L	41	5	1.66157
	RJ07	Juveniles	M	R	42	4	1.47337
	RJ07	Juveniles	M	L	43	2	0.631545
	RJ07	Juveniles	M	R	44	7	1.11571
	RJ07	Juveniles	M	L	45	3	0.926754
	RJ07	Juveniles	M	R	46	2	0.575765
	RJ07	Juveniles	M	L	47	2	0.705094
	RJ07	Juveniles	M	R	48	5	2.0836
	RJ07	Juveniles	M	L	49	2	0.709609
	RJ07	Juveniles	M	R	50	7	2.44265
	RJ07	Juveniles	M	L	51	3	0.746401
	RJ07	Juveniles	M	R	52	5	1.77719
	RJ07	Juveniles	M	L	53	2	0.0224284
	RJ07	Juveniles	M	R	54	2	0.990117
	RJ07	Juveniles	M	L	55	2	0.327359
	RJ07	Juveniles	M	R	56	4	1.83915
	RJ07	Juveniles	M	L	57	2	0.678336
	RJ07	Juveniles	M	R	58	7	2.40358
	RJ07	Juveniles	M	L	59	2	0.805229
	RJ07	Juveniles	M	R	60	2	0.652633
	RJ07	Juveniles	M	L	61	1	0.274389
	RJ07	Juveniles	M	R	62	3	1.59273
	RJ07	Juveniles	M	L	63	4	1.66726
	RJ07	Juveniles	M	R	64	4	1.94044
	RJ07	Juveniles	M	L	65	3	1.74684
	RJ07	Juveniles	M	R	66	1	0.210853
	RJ07	Juveniles	M	L	67	3	0.783546
	RJ07	Juveniles	M	R	68	1	0.240799
	RJ07	Juveniles	M	L	69	1	-0.0438316
	RJ07	Juveniles	M	R	70	7	1.61021
	RJ07	Juveniles	M	L	71	2	0.694956
	RJ07	Juveniles	M	R	72	1	-0.00568285
	RJ07	Juveniles	M	L	73	2	0.960376
	RJ07	Juveniles	M	R	74	1	0.00860017
	RJ07	Juveniles	M	L	75	3	1.62096
	RJ07	Juveniles	M	R	76	7	2.38747
	RJ07	Juveniles	M	L	77	1	0.184691
	RJ07	Juveniles	M	R	78	6	2.08143
	RJ07	Juveniles	M	L	79	4	0.6466
	RJ07	Juveniles	M	R	80	1	0.0157788
	RJ07	Juveniles	M	L	81	1	-0.0486625
	RJ07	Juveniles	M	R	82	2	1.10503
	RJ08	Juveniles	M	L	1	12	1.30788
	RJ08	Juveniles	M	R	2	3	0.978683
	RJ08	Juveniles	M	L	3	2	0.655331
	RJ08	Juveniles	M	R	4	1	-0.821023
	RJ08	Juveniles	M	L	5	1	-0.458421
	RJ08	Juveniles	M	R	6	4	1.02102
	RJ08	Juveniles	M	L	7	2	1.60361
	RJ08	Juveniles	M	R	8	1	0.204391
	RJ08	Juveniles	M	L	9	1	-0.308919
	RJ08	Juveniles	M	R	10	2	1.57475
	RJ08	Juveniles	M	L	11	2	2.32807
	RJ08	Juveniles	M	R	12	2	1.29916
	RJ08	Juveniles	M	L	13	3	0.524266
	RJ08	Juveniles	M	R	14	4	2.2576
	RJ08	Juveniles	M	L	15	1	0.171141
	RJ08	Juveniles	M	R	16	1	0.229682
	RJ08	Juveniles	M	L	17	1	-0.434152
	RJ08	Juveniles	M	R	18	2	0.551084
	RJ08	Juveniles	M	L	19	1	0.314499
	RJ08	Juveniles	M	R	20	2	1.79371
	RJ08	Juveniles	M	L	21	5	1.4294
	RJ08	Juveniles	M	R	22	3	1.6828
	RJ08	Juveniles	M	L	23	1	-0.0909791
	RJ08	Juveniles	M	R	24	4	1.23651
	RJ08	Juveniles	M	L	25	2	1.31572
	RJ08	Juveniles	M	R	26	1	0.00817418
	RJ08	Juveniles	M	L	27	2	0.657152
	RJ08	Juveniles	M	R	28	1	-0.079355
	RJ08	Juveniles	M	L	29	1	-0.111821
	RJ08	Juveniles	M	R	30	2	0.610554
	RJ08	Juveniles	M	L	31	1	0.308351
	RJ08	Juveniles	M	R	32	2	0.279439
	RJ08	Juveniles	M	L	33	2	-0.0486625
	RJ08	Juveniles	M	R	34	1	-0.127261
	RJ08	Juveniles	M	L	35	3	1.56029
	RJ08	Juveniles	M	R	36	3	2.11939
	RJ08	Juveniles	M	L	37	1	-0.0127808
	RJ08	Juveniles	M	R	38	1	-0.104577
	RJ08	Juveniles	M	L	39	1	-0.208309
	RJ08	Juveniles	M	R	40	1	0.118926
	RJ08	Juveniles	M	L	41	1	-0.0204516
	RJ08	Juveniles	M	R	42	2	1.1247
	RJ08	Juveniles	M	L	43	1	-0.0741724
	RJ08	Juveniles	M	R	44	1	0.194514
	RJ08	Juveniles	M	L	45	2	0.229938
	RJ08	Juveniles	M	R	46	1	-0.142065
	RJ08	Juveniles	M	L	47	3	1.41201
	RJ09	Juveniles	M	R	1	4	1.21296
	RJ09	Juveniles	M	L	2	1	0.609167
	RJ09	Juveniles	M	R	3	3	1.23651
	RJ09	Juveniles	M	L	4	2	1.50059
	RJ09	Juveniles	M	R	5	2	1.26564
	RJ09	Juveniles	M	L	6	3	1.15452
	RJ09	Juveniles	M	R	7	5	0.847141
	RJ09	Juveniles	M	L	8	2	0.692406
	RJ09	Juveniles	M	R	9	2	0.779163
	RJ09	Juveniles	M	L	10	5	1.64043
	RJ09	Juveniles	M	R	11	3	0.589838
	RJ09	Juveniles	M	L	12	7	1.6869
	RJ09	Juveniles	M	R	13	2	0.720325
	RJ09	Juveniles	M	L	14	4	1.39851
	RJ09	Juveniles	M	R	15	1	0.493319
	RJ09	Juveniles	M	L	16	3	1.34902
	RJ09	Juveniles	M	R	17	3	1.17624
	RJ09	Juveniles	M	L	18	2	1.71007
	RJ09	Juveniles	M	R	19	4	1.78559
	RJ09	Juveniles	M	L	20	2	1.9146
	RJ09	Juveniles	M	R	21	4	1.37219
	RJ09	Juveniles	M	L	22	2	0.973497
	RJ09	Juveniles	M	R	23	2	1.11638
	RJ09	Juveniles	M	L	24	2	1.01381
	RJ09	Juveniles	M	R	25	3	1.12208
	RJ09	Juveniles	M	L	26	2	1.38766
	RJ09	Juveniles	M	R	27	2	1.41898
	RJ09	Juveniles	M	L	28	6	2.03808
	RJ09	Juveniles	M	R	29	2	1.7425
	RJ09	Juveniles	M	L	30	1	0.260787
	RJ09	Juveniles	M	R	31	1	0.304706
	RJ09	Juveniles	M	L	32	4	2.0201
	RJ09	Juveniles	M	R	33	1	0.294466
	RJ09	Juveniles	M	L	34	2	0.392873
	RJ09	Juveniles	M	R	35	2	1.3142
	RJ09	Juveniles	M	L	36	3	1.94241
	RJ09	Juveniles	M	R	37	1	0.250908
	RJ09	Juveniles	M	L	38	2	0.913655
	RJ09	Juveniles	M	R	39	3	0.529174
	RJ09	Juveniles	M	L	40	3	1.58728
	RJ09	Juveniles	M	R	41	2	0.654946
	RJ09	Juveniles	M	L	42	1	0.197556
	RJ09	Juveniles	M	R	43	1	0.255514
	RJ09	Juveniles	M	L	44	1	0.207096
	RJ09	Juveniles	M	R	45	1	0.164353
	RJ09	Juveniles	M	L	46	2	1.31589
	RJ09	Juveniles	M	R	47	1	0.144574
	RJ09	Juveniles	M	L	48	3	1.80046
	RJ09	Juveniles	M	R	49	2	0.580925
	RJ09	Juveniles	M	L	50	2	1.10421
	RJ09	Juveniles	M	R	51	2	1.58811
	RJ09	Juveniles	M	L	52	2	1.91825
	RJ09	Juveniles	M	R	53	1	0.161967
	RJ09	Juveniles	M	L	54	2	1.60452
	RJ09	Juveniles	M	R	55	1	0.265525
	RJ09	Juveniles	M	L	56	1	0.126781
	RJ09	Juveniles	M	R	57	2	0.214049
	RJ09	Juveniles	M	L	58	1	0.121888
	RJ09	Juveniles	M	R	59	2	0.708421
	RJ09	Juveniles	M	L	60	1	-0.394695
	RJ09	Juveniles	M	R	61	2	1.46932
	RJ09	Juveniles	M	L	62	1	0.152288
	RJ09	Juveniles	M	R	63	2	0.401056
	RJ09	Juveniles	M	L	64	3	1.84821
	RJ09	Juveniles	M	R	65	2	0.595165
	RJ09	Juveniles	M	L	66	2	1.38443
	RJ09	Juveniles	M	R	67	2	1.68973
	RJ09	Juveniles	M	L	68	2	2.02589
	RJ09	Juveniles	M	R	69	1	-0.510042
	RJ10	Juveniles	M	R	1	2	0.982633
	RJ10	Juveniles	M	L	2	2	1.29394
	RJ10	Juveniles	M	R	3	2	0.213783
	RJ10	Juveniles	M	L	4	11	2.33167
	RJ10	Juveniles	M	R	5	3	1.85171
	RJ10	Juveniles	M	L	6	4	1.11564
	RJ10	Juveniles	M	R	7	11	1.83428
	RJ10	Juveniles	M	L	8	2	1.34565
	RJ10	Juveniles	M	R	9	4	1.03647
	RJ10	Juveniles	M	L	10	2	1.24388
	RJ10	Juveniles	M	R	11	4	2.07477
	RJ10	Juveniles	M	L	12	5	1.75421
	RJ10	Juveniles	M	R	13	2	0.587711
	RJ10	Juveniles	M	L	14	2	0.970719
	RJ10	Juveniles	M	R	15	1	-0.14813
	RJ10	Juveniles	M	L	16	1	0.461198
	RJ10	Juveniles	M	R	17	1	0.31133
	RJ10	Juveniles	M	L	18	3	0.808751
	RJ10	Juveniles	M	R	19	1	0.262214
	RJ10	Juveniles	M	L	20	3	1.31996
	RJ10	Juveniles	M	R	21	1	0.503791
	RJ10	Juveniles	M	L	22	4	1.44751
	RJ10	Juveniles	M	R	23	2	0.824711
	RJ10	Juveniles	M	L	24	5	2.44528
	RJ10	Juveniles	M	R	25	2	0.554731
	RJ10	Juveniles	M	L	26	1	0.1827
	RJ10	Juveniles	M	R	27	3	1.11697
	RJ10	Juveniles	M	L	28	1	-0.0195421
	RJ10	Juveniles	M	R	29	1	0.0831441
	RJ10	Juveniles	M	L	30	3	1.64267
	RJ10	Juveniles	M	R	31	4	1.83729
	RJ10	Juveniles	M	L	32	2	0.783761
	RJ10	Juveniles	M	R	33	2	1.30274
	RJ10	Juveniles	M	L	34	3	1.67564
	RJ10	Juveniles	M	R	35	3	1.78542
	RJ10	Juveniles	M	L	36	1	-0.116339
	RJ10	Juveniles	M	R	37	1	-0.252588
	RJ10	Juveniles	M	L	38	3	1.64994
	RJ10	Juveniles	M	R	39	1	0.167613
	RJ10	Juveniles	M	L	40	1	-0.034328
	RJ10	Juveniles	M	R	41	1	0.0289777
	RJ10	Juveniles	M	L	42	2	0.619511
	RJ11	Juveniles	M	L	1	5	0.930694
	RJ11	Juveniles	M	R	2	8	1.44348
	RJ11	Juveniles	M	L	3	2	0.552668
	RJ11	Juveniles	M	R	4	5	0.618048
	RJ11	Juveniles	M	L	5	4	0.961611
	RJ11	Juveniles	M	R	6	3	0.778006
	RJ11	Juveniles	M	L	7	3	0.676145
	RJ11	Juveniles	M	R	8	5	1.44866
	RJ11	Juveniles	M	L	9	2	0.526081
	RJ11	Juveniles	M	R	10	2	0.313023
	RJ11	Juveniles	M	L	11	2	1.02816
	RJ11	Juveniles	M	R	12	2	0.657916
	RJ11	Juveniles	M	L	13	4	1.74411
	RJ11	Juveniles	M	R	14	5	1.38666
	RJ11	Juveniles	M	L	15	1	0.540705
	RJ11	Juveniles	M	R	16	6	1.13523
	RJ11	Juveniles	M	L	17	7	1.47401
	RJ11	Juveniles	M	R	18	2	1.10775
	RJ11	Juveniles	M	L	19	1	0.237292
	RJ11	Juveniles	M	R	20	3	1.03949
	RJ11	Juveniles	M	L	21	1	0.247728
	RJ11	Juveniles	M	R	22	2	0.609061
	RJ11	Juveniles	M	L	23	3	0.871981
	RJ11	Juveniles	M	R	24	4	0.940068
	RJ11	Juveniles	M	L	25	1	0.207904
	RJ11	Juveniles	M	R	26	2	0.779813
	RJ11	Juveniles	M	L	27	2	0.893817
	RJ11	Juveniles	M	R	28	1	0.464042
	RJ11	Juveniles	M	L	29	3	1.13351
	RJ11	Juveniles	M	R	30	4	1.20844
	RJ11	Juveniles	M	L	31	4	1.58061
	RJ11	Juveniles	M	R	32	1	0.273927
	RJ11	Juveniles	M	L	33	5	1.6384
	RJ11	Juveniles	M	R	34	2	0.773201
	RJ11	Juveniles	M	L	35	1	0.338656
	RJ11	Juveniles	M	R	36	1	0.323458
	RJ11	Juveniles	M	L	37	1	0.113943
	RJ11	Juveniles	M	R	38	1	0.169968
	RJ11	Juveniles	M	L	39	2	0.560026
	RJ11	Juveniles	M	R	40	1	0.225826
	RJ11	Juveniles	M	L	41	3	1.26947
	RJ11	Juveniles	M	R	42	1	0.64068
	RJ11	Juveniles	M	L	43	6	1.90208
	RJ11	Juveniles	M	R	44	1	0.345766
	RJ11	Juveniles	M	L	45	1	0.108903
	RJ11	Juveniles	M	R	46	1	0.166134
	RJ11	Juveniles	M	L	47	4	1.98721
	RJ11	Juveniles	M	R	48	2	0.673574
	RJ11	Juveniles	M	L	49	2	0.580241
	RJ11	Juveniles	M	R	50	1	0.148603
	RJ11	Juveniles	M	L	51	2	1.75895
	RJ11	Juveniles	M	R	52	1	0.214049
	RJ11	Juveniles	M	L	53	2	0.901894
	RJ11	Juveniles	M	R	54	2	1.17684
	RJ11	Juveniles	M	L	55	1	0.0277572
	RJ11	Juveniles	M	R	56	2	1.43302
	RJ11	Juveniles	M	L	57	3	1.40434
	RJ11	Juveniles	M	R	58	1	-0.192465
	RJ11	Juveniles	M	L	59	3	1.13884
	RJ11	Juveniles	M	R	60	2	0.761101
	RJ11	Juveniles	M	L	61	1	0.122871
	RJ11	Juveniles	M	R	62	1	0.543696
	RJ11	Juveniles	M	L	63	2	0.216694
	RJ11	Juveniles	M	R	64	2	0.702344
	RJ11	Juveniles	M	L	65	6	2.10919
	RJ11	Juveniles	M	R	66	1	0.0178677
	RJ11	Juveniles	M	L	67	2	0.573684
	RJ11	Juveniles	M	R	68	1	0.241048
	RJ11	Juveniles	M	L	69	3	0.991625
	RJ11	Juveniles	M	R	70	1	-0.178486
	RJ11	Juveniles	M	L	71	1	0.0394141
	RJ11	Juveniles	M	R	72	1	-0.210419
	RJ11	Juveniles	M	L	73	4	1.96068
	RJ11	Juveniles	M	R	74	2	0.500922
	RJ11	Juveniles	M	L	75	5	2.41237
	RJ11	Juveniles	M	R	76	2	0.253096
	RJ11	Juveniles	M	L	77	1	0.0553783
	RJ11	Juveniles	M	R	78	1	0.268344
	RJ11	Juveniles	M	L	79	3	1.71913
	RJ11	Juveniles	M	R	80	1	0.0831441
	RJ11	Juveniles	M	L	81	6	2.35632
	RJ11	Juveniles	M	R	82	1	-0.0741724
	RJ11	Juveniles	M	L	83	5	1.98767
	RJ11	Juveniles	M	R	84	1	-0.188425
	RJ12	Juveniles	M	L	1	9	1.63461
	RJ12	Juveniles	M	R	2	4	1.17
	RJ12	Juveniles	M	L	3	3	0.378761
	RJ12	Juveniles	M	R	4	1	0.393926
	RJ12	Juveniles	M	L	5	3	2.20388
	RJ12	Juveniles	M	R	6	4	1.01187
	RJ12	Juveniles	M	L	7	2	0.52153
	RJ12	Juveniles	M	R	8	1	0.327359
	RJ12	Juveniles	M	L	9	5	2.02157
	RJ12	Juveniles	M	R	10	2	1.22118
	RJ12	Juveniles	M	L	11	3	0.793301
	RJ12	Juveniles	M	R	12	1	0.414137
	RJ12	Juveniles	M	L	13	5	1.2917
	RJ12	Juveniles	M	R	14	1	0.399154
	RJ12	Juveniles	M	L	15	1	-0.192465
	RJ12	Juveniles	M	R	16	2	0.662758
	RJ12	Juveniles	M	L	17	1	0.274389
	RJ12	Juveniles	M	R	18	1	-0.235824
	RJ12	Juveniles	M	L	19	3	0.826917
	RJ12	Juveniles	M	R	20	6	2.43745
	RJ12	Juveniles	M	L	21	5	1.77093
	RJ12	Juveniles	M	R	22	2	0.88298
	RJ12	Juveniles	M	L	23	1	0.21801
	RJ12	Juveniles	M	R	24	2	0.830139
	RJ12	Juveniles	M	L	25	1	0.248709
	RJ12	Juveniles	M	R	26	1	-0.294136
	RJ12	Juveniles	M	L	27	3	2.14935
	RJ12	Juveniles	M	R	28	4	1.47098
	RJ12	Juveniles	M	L	29	1	0.325516
	RJ12	Juveniles	M	R	30	2	0.735359
	RJ12	Juveniles	M	L	31	4	1.66255
	RJ12	Juveniles	M	R	32	4	1.1182
	RJ12	Juveniles	M	L	33	1	0.313234
	RJ12	Juveniles	M	R	34	5	2.05492
	RJ12	Juveniles	M	L	35	1	0.133539
	RJ12	Juveniles	M	R	36	1	0.0927206
	RJ12	Juveniles	M	L	37	2	1.24832
	RJ12	Juveniles	M	R	38	2	0.362671
	RJ12	Juveniles	M	L	39	2	0.92737
	RJ12	Juveniles	M	R	40	4	2.61813
	RJ12	Juveniles	M	L	41	1	-0.0893756
	RJ12	Juveniles	M	R	42	1	0.0618293
	RJ13	Adults	M	L	1	1	-0.401209
	RJ13	Adults	M	R	2	1	-0.367543
	RJ13	Adults	M	L	3	2	0.065953
	RJ13	Adults	M	R	4	4	2.15433
	RJ13	Adults	M	L	5	13	2.25748
	RJ13	Adults	M	R	6	9	1.98095
	RJ13	Adults	M	L	7	2	1.63656
	RJ13	Adults	M	R	8	7	1.45071
	RJ13	Adults	M	L	9	2	0.644931
	RJ13	Adults	M	R	10	2	1.48327
	RJ13	Adults	M	L	11	2	1.7356
	RJ13	Adults	M	R	12	8	1.92492
	RJ13	Adults	M	L	13	3	0.907035
	RJ13	Adults	M	R	14	6	1.03173
	RJ13	Adults	M	L	15	4	1.65753
	RJ13	Adults	M	R	16	9	2.37847
	RJ13	Adults	M	L	17	4	2.39868
	RJ13	Adults	M	R	18	2	0.802842
	RJ13	Adults	M	L	19	4	1.03314
	RJ13	Adults	M	R	20	5	1.20919
	RJ13	Adults	M	L	21	2	0.283753
	RJ13	Adults	M	R	22	2	0.817499
	RJ13	Adults	M	L	23	3	0.765221
	RJ13	Adults	M	R	24	2	1.51152
	RJ13	Adults	M	L	25	2	0.668665
	RJ13	Adults	M	R	26	3	1.8055
	RJ13	Adults	M	L	27	1	0.071882
	RJ13	Adults	M	R	28	2	0.789369
	RJ13	Adults	M	L	29	2	1.06311
	RJ13	Adults	M	R	30	2	2.02157
	RJ13	Adults	M	L	31	1	-0.91364
	RJ13	Adults	M	R	32	2	1.3046
	RJ13	Adults	M	L	33	1	0.546543
	RJ13	Adults	M	R	34	1	-0.233587
	RJ13	Adults	M	L	35	5	1.36868
	RJ13	Adults	M	R	36	2	1.14136
	RJ13	Adults	M	L	37	2	0.47041
	RJ13	Adults	M	R	38	1	0.478855
	RJ13	Adults	M	L	39	1	0.136086
	RJ13	Adults	M	R	40	2	1.11428
	RJ14	Adults	M	R	1	1	-0.545155
	RJ14	Adults	M	L	2	7	1.49375
	RJ14	Adults	M	R	3	3	1.1677
	RJ14	Adults	M	L	4	2	0.142076
	RJ14	Adults	M	R	5	2	0.313234
	RJ14	Adults	M	L	6	2	0.366983
	RJ14	Adults	M	R	7	3	0.909503
	RJ14	Adults	M	L	8	6	1.69973
	RJ14	Adults	M	R	9	6	1.44778
	RJ14	Adults	M	L	10	6	1.44798
	RJ14	Adults	M	R	11	9	1.79128
	RJ14	Adults	M	L	12	4	0.993833
	RJ14	Adults	M	R	13	2	0.713742
	RJ14	Adults	M	L	14	11	2.15462
	RJ14	Adults	M	R	15	3	1.4257
	RJ14	Adults	M	L	16	13	2.10866
	RJ14	Adults	M	R	17	11	1.66633
	RJ14	Adults	M	L	18	2	0.683047
	RJ14	Adults	M	R	19	11	1.29813
	RJ14	Adults	M	L	20	10	1.67037
	RJ14	Adults	M	R	21	11	2.04188
	RJ14	Adults	M	L	22	4	1.73787
	RJ14	Adults	M	R	23	2	0.434409
	RJ14	Adults	M	L	24	1	0.317227
	RJ14	Adults	M	R	25	3	0.843046
	RJ14	Adults	M	L	26	1	0.504743
	RJ14	Adults	M	R	27	5	1.25353
	RJ14	Adults	M	L	28	12	2.17405
	RJ14	Adults	M	R	29	7	1.59179
	RJ14	Adults	M	L	30	3	1.42784
	RJ14	Adults	M	R	31	1	0.440909
	RJ14	Adults	M	L	32	7	1.26224
	RJ14	Adults	M	R	33	4	1.0308
	RJ14	Adults	M	L	34	2	0.797129
	RJ14	Adults	M	R	35	17	1.91299
	RJ14	Adults	M	L	36	5	1.36577
	RJ14	Adults	M	R	37	5	1.06318
	RJ14	Adults	M	L	38	10	1.50599
	RJ14	Adults	M	R	39	7	2.30877
	RJ14	Adults	M	L	40	3	0.91169
	RJ14	Adults	M	R	41	9	1.34484
	RJ14	Adults	M	L	42	4	0.858116
	RJ14	Adults	M	R	43	4	0.881841
	RJ14	Adults	M	L	44	4	1.05862
	RJ14	Adults	M	R	45	3	0.815445
	RJ14	Adults	M	L	46	10	1.55197
	RJ14	Adults	M	R	47	3	1.16077
	RJ14	Adults	M	L	48	2	1.26484
	RJ14	Adults	M	R	49	5	1.13376
	RJ14	Adults	M	L	50	4	0.972064
	RJ14	Adults	M	R	51	4	1.51444
	RJ14	Adults	M	L	52	4	0.91429
	RJ14	Adults	M	R	53	4	1.43144
	RJ14	Adults	M	L	54	2	0.812713
	RJ14	Adults	M	R	55	2	0.846337
	RJ14	Adults	M	L	56	3	0.781612
	RJ14	Adults	M	R	57	5	1.5293
	RJ14	Adults	M	L	58	2	0.798029
	RJ14	Adults	M	R	59	1	0.523486
	RJ14	Adults	M	L	60	1	0.472025
	RJ14	Adults	M	R	61	2	1.00497
	RJ14	Adults	M	L	62	1	0.504335
	RJ14	Adults	M	R	63	1	-0.0893756
	RJ14	Adults	M	L	64	3	1.17073
	RJ14	Adults	M	R	65	1	0.304491
	RJ14	Adults	M	L	66	1	0.463296
	RJ14	Adults	M	R	67	2	0.892484
	RJ14	Adults	M	L	68	2	0.462398
	RJ14	Adults	M	R	69	3	1.42949
	RJ14	Adults	M	L	70	1	0.271377
	RJ14	Adults	M	R	71	2	0.742254
	RJ14	Adults	M	L	72	6	1.68832
	RJ14	Adults	M	R	73	1	0.453624
	RJ14	Adults	M	L	74	3	1.44348
	RJ14	Adults	M	R	75	1	0.324899
	RJ14	Adults	M	L	76	2	0.596267
	RJ14	Adults	M	R	77	5	1.42081
	RJ14	Adults	M	L	78	3	1.26961
	RJ14	Adults	M	R	79	2	0.775683
	RJ14	Adults	M	L	80	2	0.826852
	RJ14	Adults	M	R	81	1	0.398114
	RJ14	Adults	M	L	82	1	-0.218963
	RJ14	Adults	M	R	83	1	0.218798
	RJ14	Adults	M	L	84	6	1.92646
	RJ14	Adults	M	R	85	1	0.457125
	RJ14	Adults	M	L	86	4	1.58
	RJ15	Adults	M	L	1	6	0.83187
	RJ15	Adults	M	R	2	7	1.7133
	RJ15	Adults	M	L	3	2	0.377852
	RJ15	Adults	M	R	4	11	2.32513
	RJ15	Adults	M	L	5	4	1.22748
	RJ15	Adults	M	R	6	4	0.823474
	RJ15	Adults	M	L	7	7	1.26387
	RJ15	Adults	M	R	8	6	1.60036
	RJ15	Adults	M	L	9	12	2.1989
	RJ15	Adults	M	R	10	4	0.830204
	RJ15	Adults	M	L	11	2	0.544192
	RJ15	Adults	M	R	12	3	1.25888
	RJ15	Adults	M	L	13	3	1.13504
	RJ15	Adults	M	R	14	5	1.14473
	RJ15	Adults	M	L	15	1	0.299289
	RJ15	Adults	M	R	16	5	2.01977
	RJ15	Adults	M	L	17	3	1.09198
	RJ15	Adults	M	R	18	6	1.57991
	RJ15	Adults	M	L	19	4	1.65212
	RJ15	Adults	M	R	20	6	1.92169
	RJ15	Adults	M	L	21	5	1.84155
	RJ15	Adults	M	R	22	4	2.00401
	RJ15	Adults	M	L	23	4	2.34435
	RJ15	Adults	M	R	24	1	0.31133
	RJ15	Adults	M	L	25	1	0.511482
	RJ15	Adults	M	R	26	2	0.821906
	RJ15	Adults	M	L	27	4	1.09412
	RJ15	Adults	M	R	28	5	2.37981
	RJ15	Adults	M	L	29	5	1.43331
	RJ15	Adults	M	R	30	5	2.25215
	RJ15	Adults	M	L	31	2	1.01828
	RJ15	Adults	M	R	32	5	1.76375
	RJ15	Adults	M	L	33	5	1.32037
	RJ15	Adults	M	R	34	4	2.51197
	RJ15	Adults	M	L	35	3	1.74066
	RJ15	Adults	M	R	36	6	1.29228
	RJ15	Adults	M	L	37	4	1.95693
	RJ15	Adults	M	R	38	5	1.28017
	RJ15	Adults	M	L	39	2	0.6787
	RJ16	Adults	M	L	1	11	1.95749
	RJ16	Adults	M	R	2	4	1.06726
	RJ16	Adults	M	L	3	1	-0.251812
	RJ16	Adults	M	R	4	1	-0.841638
	RJ16	Adults	M	L	5	3	0.887786
	RJ16	Adults	M	R	6	4	1.06893
	RJ16	Adults	M	L	7	2	0.0354297
	RJ16	Adults	M	R	8	3	0.852236
	RJ16	Adults	M	L	9	4	1.89398
	RJ16	Adults	M	R	10	5	2.09293
	RJ16	Adults	M	L	11	4	2.38788
	RJ16	Adults	M	R	12	10	1.24363
	RJ16	Adults	M	L	13	2	-0.36251
	RJ16	Adults	M	R	14	12	2.51254
	RJ16	Adults	M	L	15	4	1.92257
	RJ16	Adults	M	R	16	9	1.2075
	RJ16	Adults	M	L	17	3	1.21503
	RJ16	Adults	M	R	18	4	1.04403
	RJ16	Adults	M	L	19	3	1.67942
	RJ16	Adults	M	R	20	4	2.04236
	RJ16	Adults	M	L	21	5	1.71255
	RJ16	Adults	M	R	22	4	1.66135
	RJ16	Adults	M	L	23	3	2.04496
	RJ16	Adults	M	R	24	2	1.21632
	RJ16	Adults	M	L	25	2	1.2058
	RJ16	Adults	M	R	26	1	0.45894
	RJ16	Adults	M	L	27	2	1.8471
	RJ16	Adults	M	R	28	1	0.45667
	RJ16	Adults	M	L	29	3	1.13501
	RJ16	Adults	M	R	30	5	2.19902
	RJ16	Adults	M	L	31	5	1.1749
	RJ17	Adults	M	R	1	2	1.45556
	RJ17	Adults	M	L	2	1	-0.258848
	RJ17	Adults	M	R	3	1	-0.863279
	RJ17	Adults	M	L	4	1	-0.367543
	RJ17	Adults	M	R	5	2	-0.381952
	RJ17	Adults	M	L	6	1	-0.464706
	RJ17	Adults	M	R	7	5	0.925364
	RJ17	Adults	M	L	8	9	1.33375
	RJ17	Adults	M	R	9	1	-0.107349
	RJ17	Adults	M	L	10	1	0.0944711
	RJ17	Adults	M	R	11	5	1.33612
	RJ17	Adults	M	L	12	1	0.16346
	RJ17	Adults	M	R	13	1	0.0902581
	RJ17	Adults	M	L	14	9	1.94008
	RJ17	Adults	M	R	15	2	1.239
	RJ17	Adults	M	L	16	7	1.99247
	RJ17	Adults	M	R	17	1	0.360404
	RJ17	Adults	M	L	18	3	2.01204
	RJ17	Adults	M	R	19	5	2.57625
	RJ17	Adults	M	L	20	6	1.16551
	RJ17	Adults	M	R	21	6	2.33031
	RJ17	Adults	M	L	22	7	1.81954
	RJ17	Adults	M	R	23	2	0.195069
	RJ17	Adults	M	L	24	17	2.22348
	RJ17	Adults	M	R	25	1	-0.939302
	RJ17	Adults	M	L	26	14	2.61441
	RJ17	Adults	M	R	27	19	2.18766
	RJ17	Adults	M	L	28	19	1.63663
	RJ17	Adults	M	R	29	19	1.83266
	RJ17	Adults	M	L	30	13	1.459
	RJ17	Adults	M	R	31	3	0.916717
	RJ17	Adults	M	L	32	3	1.87945
	RJ17	Adults	M	R	33	4	1.36453
	RJ17	Adults	M	L	34	1	0.618676
	RJ17	Adults	M	R	35	9	2.23245
	RJ17	Adults	M	L	36	2	0.593064
	RJ17	Adults	M	R	37	1	-0.150581
	RJ17	Adults	M	L	38	1	0.298416
	RJ17	Adults	M	R	39	1	0.469969
	RJ18	Adults	M	L	1	1	-0.69897
	RJ18	Adults	M	R	2	11	1.43646
	RJ18	Adults	M	L	3	2	0.906497
	RJ18	Adults	M	R	4	1	-0.614394
	RJ18	Adults	M	L	5	2	0.708591
	RJ18	Adults	M	R	6	4	1.56628
	RJ18	Adults	M	L	7	5	0.979639
	RJ18	Adults	M	R	8	2	0.626238
	RJ18	Adults	M	L	9	4	1.18153
	RJ18	Adults	M	R	10	5	2.03241
	RJ18	Adults	M	L	11	4	1.83785
	RJ18	Adults	M	R	12	1	-0.798603
	RJ18	Adults	M	L	13	1	0.436004
	RJ18	Adults	M	R	14	3	1.20946
	RJ18	Adults	M	L	15	4	1.19463
	RJ18	Adults	M	R	16	2	0.594061
	RJ18	Adults	M	L	17	1	0.335458
	RJ18	Adults	M	R	18	4	0.611086
	RJ18	Adults	M	L	19	1	-0.051587
	RJ18	Adults	M	R	20	3	0.998913
	RJ18	Adults	M	L	21	3	1.32568
	RJ18	Adults	M	R	22	2	1.71282
	RJ18	Adults	M	L	23	2	1.41514
	RJ18	Adults	M	R	24	1	-0.242604
	RJ18	Adults	M	L	25	3	1.60918
	RJ18	Adults	M	R	26	1	0.430881
	RJ18	Adults	M	L	27	4	1.23671
	RJ18	Adults	M	R	28	1	-0.0655015
	RJ18	Adults	M	L	29	2	0.913284
	RJ18	Adults	M	R	30	3	1.72302
	RJ18	Adults	M	L	31	2	1.01991
	RJ18	Adults	M	R	32	1	-0.29243
	RJ18	Adults	M	L	33	3	1.79868
	RJ18	Adults	M	R	34	1	0.424228
	RJ18	Adults	M	L	35	1	0.0944711
	RJ18	Adults	M	R	36	10	2.18317
	RJ18	Adults	M	L	37	2	0.971879
	RJ18	Adults	M	R	38	3	0.887674
	RJ18	Adults	M	L	39	2	0.792181
	RJ18	Adults	M	R	40	2	0.754042
	RJ18	Adults	M	L	41	5	1.49755
	RJ18	Adults	M	R	42	1	0.402433
	RJ18	Adults	M	L	43	2	0.728191
	RJ18	Adults	M	R	44	2	0.558228
	RJ18	Adults	M	L	45	2	0.753277
	RJ18	Adults	M	R	46	5	1.24952
	RJ18	Adults	M	L	47	2	0.729489
	RJ18	Adults	M	R	48	2	0.6289
	RJ18	Adults	M	L	49	2	0.921894
	RJ18	Adults	M	R	50	3	0.71592
	RJ18	Adults	M	L	51	5	1.31347
	RJ18	Adults	M	R	52	2	1.121
	RJ18	Adults	M	L	53	1	0.344981
	RJ18	Adults	M	R	54	1	0.272538
	RJ18	Adults	M	L	55	1	0.326541
	RJ18	Adults	M	R	56	2	0.40824
	RJ18	Adults	M	L	57	2	0.441381
	RJ18	Adults	M	R	58	1	0.269746
	RJ18	Adults	M	L	59	5	1.556
	RJ18	Adults	M	R	60	1	0.204391
	RJ18	Adults	M	L	61	2	0.691877
	RJ18	Adults	M	R	62	1	0.340246
	RJ18	Adults	M	L	63	1	0.243286
	RJ18	Adults	M	R	64	1	0.203577
	RJ18	Adults	M	L	65	1	-0.238824
	RJ18	Adults	M	R	66	3	2.30883
	RJ18	Adults	M	L	67	1	0.474216
	RJ18	Adults	M	R	68	3	1.18193
	RJ18	Adults	M	L	69	3	0.87017
	RJ18	Adults	M	R	70	2	0.636588
	RJ18	Adults	M	L	71	3	1.52475
	RJ18	Adults	M	R	72	1	0.296884
	RJ18	Adults	M	L	73	1	0.382557
	RJ18	Adults	M	R	74	2	0.365488
	RJ18	Adults	M	L	75	3	0.977083
	RJ18	Adults	M	R	76	3	0.731589
	RJ18	Adults	M	L	77	4	1.37849
	RJ18	Adults	M	R	78	1	0.0962146
	RJ18	Adults	M	L	79	1	0.420286
	RJ18	Adults	M	R	80	1	-0.047692
	RJ18	Adults	M	L	81	2	0.521007
	RJ18	Adults	M	R	82	1	0.167317
	RJ18	Adults	M	L	83	1	0.237292
	RJ18	Adults	M	R	84	1	0.199206
	RJ18	Adults	M	L	85	2	0.784475
	RJ18	Adults	M	R	86	1	0.218798
	RJ18	Adults	M	L	87	2	0.425371
	RJ18	Adults	M	R	88	2	0.306425
	RJ18	Adults	M	L	89	3	1.02768
	RJ18	Adults	M	R	90	1	0.0464952
	RJ18	Adults	M	L	91	2	1.02845
	RJ18	Adults	M	R	92	3	1.45376
	RJ18	Adults	M	L	93	1	0.0884905
	RJ18	Adults	M	R	94	2	1.14619
	RJ18	Adults	M	L	95	2	1.10188
	RJ18	Adults	M	R	96	1	0.137987
	RJ18	Adults	M	L	97	3	1.53624
	RJ18	Adults	M	R	98	1	0.0398106
	RJ18	Adults	M	L	99	1	0.0678145
	RJ18	Adults	M	R	100	2	1.36425
	RJ18	Adults	M	L	101	2	1.33441
	RJ18	Adults	M	R	102	3	2.31513
	RJ19	Adults	M	R	1	8	1.38451
	RJ19	Adults	M	L	2	3	1.38675
	RJ19	Adults	M	R	3	1	0.125806
	RJ19	Adults	M	L	4	4	1.48869
	RJ19	Adults	M	R	5	3	0.786112
	RJ19	Adults	M	L	6	14	1.42292
	RJ19	Adults	M	R	7	8	1.67199
	RJ19	Adults	M	L	8	6	0.809627
	RJ19	Adults	M	R	9	13	1.16146
	RJ19	Adults	M	L	10	5	0.985382
	RJ19	Adults	M	R	11	2	0.407051
	RJ19	Adults	M	L	12	21	2.31827
	RJ19	Adults	M	R	13	14	1.74118
	RJ19	Adults	M	L	14	2	1.68075
	RJ19	Adults	M	R	15	16	1.65165
	RJ19	Adults	M	L	16	6	1.27191
	RJ19	Adults	M	R	17	9	1.7286
	RJ19	Adults	M	L	18	3	0.849604
	RJ19	Adults	M	R	19	1	0.0610753
	RJ19	Adults	M	L	20	1	0.376394
	RJ19	Adults	M	R	21	1	0.160769
	RJ19	Adults	M	L	22	3	1.59476
	RJ19	Adults	M	R	23	8	1.68926
	RJ19	Adults	M	L	24	1	0.669224
	RJ19	Adults	M	R	25	6	1.42385
	RJ19	Adults	M	L	26	1	0.338058
	RJ19	Adults	M	R	27	11	1.85725
	RJ19	Adults	M	L	28	5	1.09809
	RJ19	Adults	M	R	29	18	2.24799
	RJ19	Adults	M	L	30	1	0.263873
	RJ19	Adults	M	R	31	16	1.42485
	RJ19	Adults	M	L	32	1	0.482731
	RJ19	Adults	M	R	33	9	1.44267
	RJ19	Adults	M	L	34	5	1.16929
	RJ19	Adults	M	R	35	3	2.05748
	RJ19	Adults	M	L	36	2	0.959852
	RJ19	Adults	M	R	37	4	1.56049
	RJ19	Adults	M	L	38	3	2.12929
	RJ19	Adults	M	R	39	4	0.657343
	RJ19	Adults	M	L	40	1	0.369401
	RJ19	Adults	M	R	41	4	1.50856
	RJ19	Adults	M	L	42	3	1.19813
	RJ19	Adults	M	R	43	5	1.24861
	RJ19	Adults	M	L	44	4	1.04716
	RJ19	Adults	M	R	45	4	1.01267
	RJ19	Adults	M	L	46	1	0.649043
	RJ19	Adults	M	R	47	2	0.879497
	RJ19	Adults	M	L	48	3	1.12985
	RJ19	Adults	M	R	49	4	1.11886
	RJ19	Adults	M	L	50	6	1.30989
	RJ19	Adults	M	R	51	4	1.42146
	RJ19	Adults	M	L	52	3	1.2697
	RJ19	Adults	M	R	53	1	0.768268
	RJ19	Adults	M	L	54	1	0.611723
	RJ19	Adults	M	R	55	3	0.866937
	RJ19	Adults	M	L	56	2	0.607562
	RJ19	Adults	M	R	57	5	1.57451
	RJ19	Adults	M	L	58	2	0.971229
	RJ19	Adults	M	R	59	1	0.0413927
	RJ19	Adults	M	L	60	2	0.738543
	RJ19	Adults	M	R	61	2	0.657534
	RJ19	Adults	M	L	62	1	0.375298
	RJ19	Adults	M	R	63	1	0.175512
	RJ19	Adults	M	L	64	8	1.68159
	RJ19	Adults	M	R	65	2	0.944384
	RJ19	Adults	M	L	66	1	0.105169
	RJ19	Adults	M	R	67	3	0.730702
	RJ19	Adults	M	L	68	2	1.3223
	RJ19	Adults	M	R	69	1	0.602819
	RJ19	Adults	M	L	70	1	0.126781
	RJ19	Adults	M	R	71	1	0.73464
	RJ19	Adults	M	L	72	2	0.833402
	RJ19	Adults	M	R	73	2	1.07401
	RJ19	Adults	M	L	74	5	1.34793
	RJ19	Adults	M	R	75	1	0.788593
	RJ19	Adults	M	L	76	1	0.488269
	RJ20	Adults	M	R	1	2	0.786893
	RJ20	Adults	M	L	2	2	0.227372
	RJ20	Adults	M	R	3	7	1.21227
	RJ20	Adults	M	L	4	4	2.30655
	RJ20	Adults	M	R	5	5	1.55901
	RJ20	Adults	M	L	6	1	0.43361
	RJ20	Adults	M	R	7	3	0.383815
	RJ20	Adults	M	L	8	3	0.420451
	RJ20	Adults	M	R	9	4	0.954677
	RJ20	Adults	M	L	10	3	1.13072
	RJ20	Adults	M	R	11	3	1.59632
	RJ20	Adults	M	L	12	7	2.12278
	RJ20	Adults	M	R	13	3	0.772395
	RJ20	Adults	M	L	14	2	0.622318
	RJ20	Adults	M	R	15	6	1.35238
	RJ20	Adults	M	L	16	5	1.79251
	RJ20	Adults	M	R	17	1	0.401745
	RJ20	Adults	M	L	18	7	1.68816
	RJ20	Adults	M	R	19	5	1.15473
	RJ20	Adults	M	L	20	1	0.255755
	RJ20	Adults	M	R	21	2	0.491922
	RJ20	Adults	M	L	22	3	0.261501
	RJ20	Adults	M	R	23	2	0.866701
	RJ20	Adults	M	L	24	3	1.35098
	RJ20	Adults	M	R	25	2	0.810904
	RJ20	Adults	M	L	26	6	2.19553
	RJ20	Adults	M	R	27	5	1.34329
	RJ20	Adults	M	L	28	8	2.11986
	RJ20	Adults	M	R	29	2	0.762829
	RJ20	Adults	M	L	30	8	2.16043
	RJ20	Adults	M	R	31	9	2.05388
	RJ20	Adults	M	L	32	4	1.67493
	RJ20	Adults	M	R	33	4	1.07864
	RJ20	Adults	M	L	34	4	2.3257
	RJ20	Adults	M	R	35	2	0.150449
	RJ20	Adults	M	L	36	13	2.77095
	RJ20	Adults	M	R	37	1	0.353916
	RJ20	Adults	M	L	38	1	-0.116339
	RJ20	Adults	M	R	39	1	0.210586
	RJ20	Adults	M	L	40	1	0.223496
	RJ20	Adults	M	R	41	3	0.877774
	RJ20	Adults	M	L	42	7	1.66918
	RJ20	Adults	M	R	43	3	0.642465
	RJ20	Adults	M	L	44	1	-0.106793
	RJ20	Adults	M	R	45	3	1.36163
	RJ20	Adults	M	L	46	1	-0.0510982
	RJ21	Adults	M	L	1	1	-0.565431
	RJ21	Adults	M	R	2	2	1.07302
	RJ21	Adults	M	L	3	2	0.237544
	RJ21	Adults	M	R	4	4	0.888965
	RJ21	Adults	M	L	5	6	1.86344
	RJ21	Adults	M	R	6	3	1.47125
	RJ21	Adults	M	L	7	5	0.894593
	RJ21	Adults	M	R	8	5	0.961563
	RJ21	Adults	M	L	9	1	0.196176
	RJ21	Adults	M	R	10	6	1.3241
	RJ21	Adults	M	L	11	2	1.59892
	RJ21	Adults	M	R	12	2	1.27683
	RJ21	Adults	M	L	13	4	1.11381
	RJ21	Adults	M	R	14	5	0.928293
	RJ21	Adults	M	L	15	1	0.517724
	RJ21	Adults	M	R	16	1	-0.0395292
	RJ21	Adults	M	L	17	6	1.22827
	RJ21	Adults	M	R	18	6	2.08119
	RJ21	Adults	M	L	19	4	1.06126
	RJ21	Adults	M	R	20	8	1.56041
	RJ21	Adults	M	L	21	7	1.07573
	RJ21	Adults	M	R	22	1	0.0132587
	RJ21	Adults	M	L	23	13	1.70473
	RJ21	Adults	M	R	24	12	1.89582
	RJ21	Adults	M	L	25	1	0.0648322
	RJ21	Adults	M	R	26	2	0.291591
	RJ21	Adults	M	L	27	4	0.966986
	RJ21	Adults	M	R	28	2	1.37074
	RJ21	Adults	M	L	29	6	1.79779
	RJ21	Adults	M	R	30	2	2.06653
	RJ21	Adults	M	L	31	2	0.804139
	RJ21	Adults	M	R	32	2	-0.00348833
	RJ21	Adults	M	L	33	4	2.02841
	RJ21	Adults	M	R	34	3	1.51659
	RJ21	Adults	M	L	35	5	1.0083
	RJ21	Adults	M	R	36	2	1.581
	RJ21	Adults	M	L	37	3	0.93465
	RJ21	Adults	M	R	38	5	1.20077
	RJ21	Adults	M	L	39	3	0.550962
	RJ21	Adults	M	R	40	4	2.51957
	RJ21	Adults	M	L	41	2	0.25358
	RJ21	Adults	M	R	42	1	0.279667
	RJ21	Adults	M	L	43	1	0.193681
	RJ21	Adults	M	R	44	1	0.0472749
	RJ21	Adults	M	L	45	1	0.736476
	RJ21	Adults	M	R	46	2	1.62206
	RJ21	Adults	M	L	47	26	1.7068
	RJ21	Adults	M	R	48	23	2.04141
	RJ21	Adults	M	L	49	4	1.22549
	RJ21	Adults	M	R	50	10	1.55818
	RJ21	Adults	M	L	51	4	0.882411
	RJ21	Adults	M	R	52	5	0.937418
	RJ21	Adults	M	L	53	37	1.90324
	RJ21	Adults	M	R	54	13	1.43205
	RJ21	Adults	M	L	55	7	1.10404
	RJ21	Adults	M	R	56	5	1.07445
	RJ21	Adults	M	L	57	13	1.24886
	RJ21	Adults	M	R	58	1	0.752125
	RJ21	Adults	M	L	59	5	1.53289
	RJ22	Adults	M	R	1	1	0.676145
	RJ22	Adults	M	L	2	9	1.28867
	RJ22	Adults	M	R	3	1	0.0700379
	RJ22	Adults	M	L	4	6	1.37096
	RJ22	Adults	M	R	5	2	1.23664
	RJ22	Adults	M	L	6	4	1.61053
	RJ22	Adults	M	R	7	12	1.55891
	RJ22	Adults	M	L	8	1	0.367542
	RJ22	Adults	M	R	9	1	-0.00217692
	RJ22	Adults	M	L	10	4	0.839101
	RJ22	Adults	M	R	11	4	1.07173
	RJ22	Adults	M	L	12	4	1.11621
	RJ22	Adults	M	R	13	6	1.41537
	RJ22	Adults	M	L	14	2	1.37738
	RJ22	Adults	M	R	15	7	1.15851
	RJ22	Adults	M	L	16	4	0.939519
	RJ22	Adults	M	R	17	3	0.498035
	RJ22	Adults	M	L	18	1	0.222196
	RJ22	Adults	M	R	19	9	1.43816
	RJ22	Adults	M	L	20	2	0.680607
	RJ22	Adults	M	R	21	5	1.53121
	RJ22	Adults	M	L	22	1	0.247728
	RJ22	Adults	M	R	23	3	1.51829
	RJ22	Adults	M	L	24	3	1.25307
	RJ22	Adults	M	R	25	2	0.746712
	RJ22	Adults	M	L	26	1	0.130334
	RJ22	Adults	M	R	27	3	0.698709
	RJ22	Adults	M	L	28	4	0.997343
	RJ22	Adults	M	R	29	7	1.76066
	RJ22	Adults	M	L	30	2	0.74679
	RJ22	Adults	M	R	31	4	0.672005
	RJ22	Adults	M	L	32	4	1.08128
	RJ22	Adults	M	R	33	4	0.797406
	RJ22	Adults	M	L	34	3	1.06352
	RJ22	Adults	M	R	35	8	1.46679
	RJ22	Adults	M	L	36	6	1.39088
	RJ22	Adults	M	R	37	7	1.03314
	RJ22	Adults	M	L	38	2	0.434888
	RJ22	Adults	M	R	39	7	0.872389
	RJ22	Adults	M	L	40	3	1.03575
	RJ22	Adults	M	R	41	7	1.2052
	RJ22	Adults	M	L	42	5	1.15418
	RJ22	Adults	M	R	43	6	1.07842
	RJ22	Adults	M	L	44	3	1.57631
	RJ22	Adults	M	R	45	4	0.909877
	RJ22	Adults	M	L	46	1	0.646698
	RJ22	Adults	M	R	47	3	0.831742
	RJ22	Adults	M	L	48	1	0.236537
	RJ22	Adults	M	R	49	4	1.01691
	RJ22	Adults	M	L	50	3	1.01603
	RJ22	Adults	M	R	51	4	1.16203
	RJ22	Adults	M	L	52	2	0.732313
	RJ22	Adults	M	R	53	5	1.18974
	RJ22	Adults	M	L	54	1	0.548144
	RJ22	Adults	M	R	55	4	1.50162
	RJ22	Adults	M	L	56	4	1.49415
	RJ22	Adults	M	R	57	3	0.822233
	RJ22	Adults	M	L	58	2	0.879555
	RJ22	Adults	M	R	59	4	0.860697
	RJ22	Adults	M	L	60	2	1.12882
	RJ22	Adults	M	R	61	1	0.161667
	RJ22	Adults	M	L	62	2	1.13357
	RJ22	Adults	M	R	63	1	0.323046
	RJ22	Adults	M	L	64	1	0.547529
	RJ22	Adults	M	R	65	3	1.74425
	RJ22	Adults	M	L	66	8	1.70652
	RJ22	Adults	M	R	67	3	1.30952
	RJ22	Adults	M	L	68	2	0.821317
	RJ22	Adults	M	R	69	2	0.295127
	RJ22	Adults	M	L	70	1	0.55461
	RJ22	Adults	M	R	71	3	1.58106
	RJ22	Adults	M	L	72	1	0.120574
	RJ22	Adults	M	R	73	2	0.768416
	RJ22	Adults	M	L	74	1	0.613207
	RJ22	Adults	M	R	75	2	0.682686
	RJ22	Adults	M	L	76	2	0.772762
	RJ22	Adults	M	R	77	3	1.26472
	RJ22	Adults	M	L	78	1	0.772175
	RJ22	Adults	M	R	79	3	1.19844
	RJ22	Adults	M	L	80	2	0.701222
	RJ22	Adults	M	R	81	1	0.495267
	RJ22	Adults	M	L	82	3	1.55517
	RJ22	Adults	M	R	83	4	1.83177
	RJ22	Adults	M	L	84	2	0.902221
	RJ22	Adults	M	R	85	1	0.48373
	RJ22	Adults	M	L	86	2	0.933437
	RJ22	Adults	M	R	87	1	-0.422508
	RJ22	Adults	M	L	88	1	0.562055
	RJ22	Adults	M	R	89	2	0.712229
	RJ22	Adults	M	L	90	3	1.5366
	RJ22	Adults	M	R	91	4	1.612
	RJ22	Adults	M	L	92	3	1.17009
	RJ22	Adults	M	R	93	2	1.27453
	RJ22	Adults	M	L	94	1	0.704151
	RJ22	Adults	M	R	95	1	0.38507
	RJ22	Adults	M	L	96	3	2.02566
	RJ22	Adults	M	R	97	1	0.369216
	RJ22	Adults	M	L	98	1	-0.110138
	RJ22	Adults	M	R	99	3	0.779019
	RJ22	Adults	M	L	100	2	1.36765
	RJ22	Adults	M	R	101	3	1.66455
	RJ22	Adults	M	L	102	3	1.5592
	RJ22	Adults	M	R	103	2	1.15897
	RJ22	Adults	M	L	104	4	1.94061
	RJ22	Adults	M	R	105	1	0.128722
	RJ22	Adults	M	L	106	1	-0.826814
	RJ23	Adults	M	R	1	1	0.647285
	RJ23	Adults	M	L	2	3	0.664266
	RJ23	Adults	M	R	3	4	0.953131
	RJ23	Adults	M	L	4	3	1.58662
	RJ23	Adults	M	R	5	1	0.0906107
	RJ23	Adults	M	L	6	3	1.22629
	RJ23	Adults	M	R	7	3	0.69223
	RJ23	Adults	M	L	8	2	0.440752
	RJ23	Adults	M	R	9	12	1.46616
	RJ23	Adults	M	L	10	2	0.990472
	RJ23	Adults	M	R	11	7	1.1634
	RJ23	Adults	M	L	12	2	0.639984
	RJ23	Adults	M	R	13	8	1.14383
	RJ23	Adults	M	L	14	2	0.794976
	RJ23	Adults	M	R	15	4	0.801952
	RJ23	Adults	M	L	16	2	0.260787
	RJ23	Adults	M	R	17	3	1.13232
	RJ23	Adults	M	L	18	3	1.40559
	RJ23	Adults	M	R	19	6	1.84332
	RJ23	Adults	M	L	20	2	1.02551
	RJ23	Adults	M	R	21	2	0.656002
	RJ23	Adults	M	L	22	5	0.920801
	RJ23	Adults	M	R	23	2	0.49276
	RJ23	Adults	M	L	24	8	1.39888
	RJ23	Adults	M	R	25	8	1.50888
	RJ23	Adults	M	L	26	9	1.20841
	RJ23	Adults	M	R	27	3	0.960518
	RJ23	Adults	M	L	28	1	0.245019
	RJ23	Adults	M	R	29	9	1.31148
	RJ23	Adults	M	L	30	4	0.885531
	RJ23	Adults	M	R	31	3	1.46442
	RJ23	Adults	M	L	32	1	0.34183
	RJ23	Adults	M	R	33	2	0.372728
	RJ23	Adults	M	L	34	7	1.3597
	RJ23	Adults	M	R	35	4	1.16619
	RJ23	Adults	M	L	36	13	1.37304
	RJ23	Adults	M	R	37	2	0.790918
	RJ23	Adults	M	L	38	6	1.38084
	RJ23	Adults	M	R	39	1	0.045323
	RJ23	Adults	M	L	40	4	1.06104
	RJ23	Adults	M	R	41	1	0.533264
	RJ23	Adults	M	L	42	1	0.180126
	RJ23	Adults	M	R	43	4	1.45773
	RJ23	Adults	M	L	44	3	0.63488
	RJ23	Adults	M	R	45	6	1.64029
	RJ23	Adults	M	L	46	9	1.55635
	RJ23	Adults	M	R	47	1	0.482016
	RJ23	Adults	M	L	48	2	0.879096
	RJ23	Adults	M	R	49	2	1.64146
	RJ23	Adults	M	L	50	1	0.681693
	RJ23	Adults	M	R	51	1	-0.0909791
	RJ23	Adults	M	L	52	6	1.82999
	RJ23	Adults	M	R	53	5	1.47653
	RJ23	Adults	M	L	54	11	1.65445
	RJ23	Adults	M	R	55	3	0.974604
	RJ23	Adults	M	L	56	5	0.87303
	RJ23	Adults	M	R	57	5	1.082
	RJ23	Adults	M	L	58	5	0.970347
	RJ23	Adults	M	R	59	1	0.000867722
	RJ23	Adults	M	L	60	4	0.722716
	RJ23	Adults	M	R	61	2	1.22989
	RJ23	Adults	M	L	62	7	1.26567
	RJ23	Adults	M	R	63	1	0.514016
	RJ23	Adults	M	L	64	9	1.738
	RJ23	Adults	M	R	65	7	1.5071
	RJ23	Adults	M	L	66	12	1.70572
	RJ23	Adults	M	R	67	1	0.377124
	RJ23	Adults	M	L	68	2	0.783046
	RJ23	Adults	M	R	69	4	1.56961
	RJ23	Adults	M	L	70	20	1.97495
	RJ23	Adults	M	R	71	6	1.41315
	RJ23	Adults	M	L	72	5	1.03007
	RJ23	Adults	M	R	73	15	1.71041
	RJ23	Adults	M	L	74	7	1.24935
	RJ23	Adults	M	R	75	5	1.51945
	RJ23	Adults	M	L	76	7	1.1211
	RJ23	Adults	M	R	77	4	1.64543
	RJ23	Adults	M	L	78	9	1.44946
	RJ23	Adults	M	R	79	2	0.809829
	RJ23	Adults	M	L	80	7	0.789016
	RJ23	Adults	M	R	81	6	1.41387
	RJ23	Adults	M	L	82	2	1.95028
	RJ23	Adults	M	R	83	2	0.823474
	RJ23	Adults	M	L	84	2	0.85685
	RJ23	Adults	M	R	85	8	1.29092
	RJ23	Adults	M	L	86	2	0.359646
	RJ23	Adults	M	R	87	7	1.59165
	RJ23	Adults	M	L	88	3	0.866051
	RJ24	Adults	M	R	1	8	1.79463
	RJ24	Adults	M	L	2	1	0.594945
	RJ24	Adults	M	R	3	1	-0.0132283
	RJ24	Adults	M	L	4	1	-0.197226
	RJ24	Adults	M	R	5	3	1.68488
	RJ24	Adults	M	L	6	2	1.08711
	RJ24	Adults	M	R	7	2	0.327767
	RJ24	Adults	M	L	8	3	1.14943
	RJ24	Adults	M	R	9	5	1.03886
	RJ24	Adults	M	L	10	1	0.474216
	RJ24	Adults	M	R	11	3	1.30546
	RJ24	Adults	M	L	12	4	1.29226
	RJ24	Adults	M	R	13	4	0.988381
	RJ24	Adults	M	L	14	1	0.238046
	RJ24	Adults	M	R	15	3	0.974926
	RJ24	Adults	M	L	16	1	0.462548
	RJ24	Adults	M	R	17	5	1.24358
	RJ24	Adults	M	L	18	4	0.831742
	RJ24	Adults	M	R	19	2	1.18141
	RJ24	Adults	M	L	20	2	0.623042
	RJ24	Adults	M	R	21	7	1.26665
	RJ24	Adults	M	L	22	2	1.26689
	RJ24	Adults	M	R	23	1	-0.533132
	RJ24	Adults	M	L	24	7	1.08983
	RJ24	Adults	M	R	25	1	0.416474
	RJ24	Adults	M	L	26	3	1.53608
	RJ24	Adults	M	R	27	7	1.27423
	RJ24	Adults	M	L	28	1	0.26811
	RJ24	Adults	M	R	29	3	0.882752
	RJ24	Adults	M	L	30	6	1.41893
	RJ24	Adults	M	R	31	10	1.60452
	RJ24	Adults	M	L	32	1	0.41514
	RJ24	Adults	M	R	33	4	0.979912
	RJ24	Adults	M	L	34	6	1.68105
	RJ24	Adults	M	R	35	3	1.09167
	RJ24	Adults	M	L	36	4	1.1975
	RJ24	Adults	M	R	37	5	1.01632
	RJ24	Adults	M	L	38	4	1.25503
	RJ24	Adults	M	R	39	5	1.45341
	RJ24	Adults	M	L	40	6	1.11012
	RJ24	Adults	M	R	41	2	0.842796
	RJ24	Adults	M	L	42	3	0.883775
	RJ24	Adults	M	R	43	1	0.580355
	RJ24	Adults	M	L	44	1	0.455454
	RJ24	Adults	M	R	45	2	1.01812
	RJ24	Adults	M	L	46	4	1.3348
	RJ24	Adults	M	R	47	3	0.988291
	RJ24	Adults	M	L	48	6	1.55312
	RJ24	Adults	M	R	49	2	0.981003
	RJ24	Adults	M	L	50	2	0.88846
	RJ24	Adults	M	R	51	5	1.15528
	RJ24	Adults	M	L	52	10	1.82541
	RJ24	Adults	M	R	53	2	0.979275
	RJ24	Adults	M	L	54	3	1.25573
	RJ24	Adults	M	R	55	2	0.676328
	RJ24	Adults	M	L	56	4	1.44581
	RJ24	Adults	M	R	57	7	1.54446
	RJ24	Adults	M	L	58	3	0.988604
	RJ24	Adults	M	R	59	3	1.24959
	RJ24	Adults	M	L	60	1	0.264582
	RJ24	Adults	M	R	61	24	1.70304
	RJ24	Adults	M	L	62	2	0.617839
	RJ24	Adults	M	R	63	1	0.733598
	RJ24	Adults	M	L	64	2	0.754578
	RJ24	Adults	M	R	65	3	1.05971
	RJ24	Adults	M	L	66	1	0.493876
	RJ24	Adults	M	R	67	5	1.00847
	RJ24	Adults	M	L	68	1	0.377852
	RJ24	Adults	M	R	69	5	0.967314
	RJ24	Adults	M	L	70	2	0.659441
	RJ24	Adults	M	R	71	8	1.26947
	RJ24	Adults	M	L	72	3	0.948364
	RJ24	Adults	M	R	73	9	1.25799
	RJ24	Adults	M	L	74	5	1.34132
	RJ24	Adults	M	R	75	5	1.16932
	RJ24	Adults	M	L	76	2	0.742647
	RJ24	Adults	M	R	77	4	1.17972
	RJ24	Adults	M	L	78	5	1.13469
	RJ24	Adults	M	R	79	6	1.31252
	RJ24	Adults	M	L	80	2	0.814181
	RJ24	Adults	M	R	81	9	1.48958
	RJ24	Adults	M	L	82	2	0.579326
	RJ24	Adults	M	R	83	5	1.10548
	RJ24	Adults	M	L	84	2	0.76886
	RJ24	Adults	M	R	85	6	1.41132
	RJ24	Adults	M	L	86	2	0.629715
	RJ24	Adults	M	R	87	4	1.01778
	RJ24	Adults	M	L	88	2	0.721563
	RJ24	Adults	M	R	89	3	1.01853
	RJ24	Adults	M	L	90	3	1.22081
	RJ24	Adults	M	R	91	5	1.34982
	RJ24	Adults	M	L	92	1	-0.000434512
	RJ24	Adults	M	R	93	4	1.31122
	RJ24	Adults	M	L	94	4	1.76943
	RJ24	Adults	M	R	95	9	1.60099
	RJ24	Adults	M	L	96	2	1.21896
	RJ24	Adults	M	R	97	4	1.4383
	RJ24	Adults	M	L	98	2	0.964024
	RJ24	Adults	M	R	99	7	1.62612
	RJ24	Adults	M	L	100	2	0.64836
	RJ24	Adults	M	R	101	5	1.21972
	RJ24	Adults	M	L	102	5	1.51695
	RJ24	Adults	M	R	103	10	1.91306
	RJ24	Adults	M	L	104	2	0.688242
	RJ24	Adults	M	R	105	5	1.2461
	RJ24	Adults	M	L	106	2	0.879039
	RJ24	Adults	M	R	107	5	1.30999
	RJ24	Adults	M	L	108	2	0.63759
	RJ24	Adults	M	R	109	7	1.77704
	RJ24	Adults	M	L	110	1	0.408918
	RJ24	Adults	M	R	111	3	1.22324
	RJ24	Adults	M	L	112	1	0.412124
	RJ24	Adults	M	R	113	1	0.337459
	RJ24	Adults	M	L	114	1	0.443419
	RJ24	Adults	M	R	115	5	1.46297
	RJ24	Adults	M	L	116	1	-0.0814455
	RJ24	Adults	M	R	117	3	1.4755
	RJ24	Adults	M	L	118	2	0.931305
	RJ24	Adults	M	R	119	3	1.26715
	RJ24	Adults	M	L	120	1	0.125806
	RJ24	Adults	M	R	121	4	1.40628
	RJ24	Adults	M	L	122	1	0.163161
	RJ24	Adults	M	R	123	4	1.52612
	RJ24	Adults	M	L	124	2	0.793721
	RJ24	Adults	M	R	125	5	1.56944
	RJ24	Adults	M	L	126	1	-0.0520764
	RJ24	Adults	M	R	127	2	1.10561
	RJ24	Adults	M	L	128	2	1.06427
	RJ24	Adults	M	R	129	5	1.71231
	RJ24	Adults	M	L	130	1	0.079543
	RJ24	Adults	M	R	131	6	2.11963
	RJ24	Adults	M	L	132	1	0.0216027
	RJ24	Adults	M	R	133	6	2.39464
	RJ49	Juveniles	F	R	1	2	0.954098
	RJ49	Juveniles	F	L	2	2	1.10954
	RJ49	Juveniles	F	R	3	1	0.230193
	RJ49	Juveniles	F	L	4	1	0.403978
	RJ49	Juveniles	F	R	5	3	0.753966
	RJ49	Juveniles	F	L	6	1	0.37328
	RJ49	Juveniles	F	R	7	1	0.313445
	RJ49	Juveniles	F	L	8	1	0.270912
	RJ49	Juveniles	F	R	9	1	0.31973
	RJ49	Juveniles	F	L	10	4	1.10168
	RJ49	Juveniles	F	R	11	1	-0.423659
	RJ49	Juveniles	F	L	12	4	0.983716
	RJ49	Juveniles	F	R	13	3	0.885078
	RJ49	Juveniles	F	L	14	4	1.21704
	RJ49	Juveniles	F	R	15	2	0.699057
	RJ49	Juveniles	F	L	16	7	2.09697
	RJ49	Juveniles	F	R	17	1	0.489537
	RJ49	Juveniles	F	L	18	4	1.22912
	RJ49	Juveniles	F	R	19	1	0.50853
	RJ49	Juveniles	F	L	20	1	-0.0501223
	RJ49	Juveniles	F	R	21	2	0.73464
	RJ49	Juveniles	F	L	22	3	2.21359
	RJ49	Juveniles	F	R	23	1	0.473341
	RJ49	Juveniles	F	L	24	6	1.88309
	RJ49	Juveniles	F	R	25	6	1.31934
	RJ49	Juveniles	F	L	26	9	1.7799
	RJ49	Juveniles	F	R	27	6	1.60049
	RJ49	Juveniles	F	L	28	2	0.886716
	RJ49	Juveniles	F	R	29	4	0.858417
	RJ49	Juveniles	F	L	30	5	1.56792
	RJ49	Juveniles	F	R	31	3	0.859138
	RJ49	Juveniles	F	L	32	1	0.367915
	RJ49	Juveniles	F	R	33	1	-0.09691
	RJ49	Juveniles	F	L	34	15	1.53876
	RJ49	Juveniles	F	R	35	1	0.242541
	RJ49	Juveniles	F	L	36	4	1.37831
	RJ49	Juveniles	F	R	37	2	0.284431
	RJ49	Juveniles	F	L	38	2	0.779019
	RJ49	Juveniles	F	R	39	4	1.70904
	RJ49	Juveniles	F	L	40	6	1.32644
	RJ49	Juveniles	F	R	41	1	0.191171
	RJ49	Juveniles	F	L	42	5	2.26811
	RJ49	Juveniles	F	R	43	1	0.219585
	RJ49	Juveniles	F	L	44	1	0.389875
	RJ49	Juveniles	F	R	45	1	-0.104577
	RJ49	Juveniles	F	L	46	8	1.8403
	RJ49	Juveniles	F	R	47	2	1.03731
	RJ49	Juveniles	F	L	48	3	1.13583
	RJ49	Juveniles	F	R	49	1	0.1827
	RJ49	Juveniles	F	L	50	3	0.765445
	RJ49	Juveniles	F	R	51	1	0.288473
	RJ49	Juveniles	F	L	52	4	1.80916
	RJ49	Juveniles	F	R	53	1	0.259355
	RJ49	Juveniles	F	L	54	1	0.536937
	RJ49	Juveniles	F	R	55	1	0.183555
	RJ49	Juveniles	F	L	56	2	1.0821
	RJ49	Juveniles	F	R	57	1	0.107888
	RJ49	Juveniles	F	L	58	7	2.01477
	RJ49	Juveniles	F	R	59	2	2.32768
	RJ49	Juveniles	F	L	60	2	0.878177
	RJ49	Juveniles	F	R	61	1	0.234264
	RJ49	Juveniles	F	L	62	3	1.39243
	RJ49	Juveniles	F	R	63	3	2.44885
	RJ49	Juveniles	F	L	64	6	1.85092
	RJ49	Juveniles	F	R	65	1	0.16938
	RJ50	Juveniles	F	L	1	1	0.812713
	RJ50	Juveniles	F	R	2	4	1.33323
	RJ50	Juveniles	F	L	3	6	2.0077
	RJ50	Juveniles	F	R	4	2	0.647676
	RJ50	Juveniles	F	L	5	6	1.75283
	RJ50	Juveniles	F	R	6	2	0.482588
	RJ50	Juveniles	F	L	7	1	-0.772113
	RJ50	Juveniles	F	R	8	3	0.95564
	RJ50	Juveniles	F	L	9	1	0.574841
	RJ50	Juveniles	F	R	10	1	-0.257275
	RJ50	Juveniles	F	L	11	6	1.45627
	RJ50	Juveniles	F	R	12	3	1.22706
	RJ50	Juveniles	F	L	13	2	1.48507
	RJ50	Juveniles	F	R	14	7	1.49238
	RJ50	Juveniles	F	L	15	2	0.633771
	RJ50	Juveniles	F	R	16	6	1.30456
	RJ50	Juveniles	F	L	17	7	1.54627
	RJ50	Juveniles	F	R	18	3	1.0242
	RJ50	Juveniles	F	L	19	7	1.71174
	RJ50	Juveniles	F	R	20	2	1.73785
	RJ50	Juveniles	F	L	21	5	1.29369
	RJ50	Juveniles	F	R	22	4	1.5296
	RJ50	Juveniles	F	L	23	4	0.970997
	RJ50	Juveniles	F	R	24	2	0.594834
	RJ50	Juveniles	F	L	25	2	1.09506
	RJ50	Juveniles	F	R	26	2	1.16959
	RJ50	Juveniles	F	L	27	4	1.75977
	RJ50	Juveniles	F	R	28	5	1.96347
	RJ50	Juveniles	F	L	29	2	0.534534
	RJ50	Juveniles	F	R	30	2	0.387746
	RJ50	Juveniles	F	L	31	1	0.399847
	RJ50	Juveniles	F	R	32	1	0.0842187
	RJ50	Juveniles	F	L	33	3	1.08817
	RJ50	Juveniles	F	R	34	4	0.591732
	RJ50	Juveniles	F	L	35	5	0.84342
	RJ50	Juveniles	F	R	36	2	0.31973
	RJ50	Juveniles	F	L	37	1	0.0115704
	RJ50	Juveniles	F	R	38	3	0.93832
	RJ50	Juveniles	F	L	39	3	1.11331
	RJ50	Juveniles	F	R	40	1	0.192289
	RJ50	Juveniles	F	L	41	1	0.432328
	RJ50	Juveniles	F	R	42	5	1.96672
	RJ50	Juveniles	F	L	43	1	0.411283
	RJ50	Juveniles	F	R	44	2	1.22549
	RJ50	Juveniles	F	L	45	3	1.03547
	RJ50	Juveniles	F	R	46	2	0.389166
	RJ50	Juveniles	F	L	47	6	0.585574
	RJ50	Juveniles	F	R	48	4	0.815976
	RJ50	Juveniles	F	L	49	5	1.32064
	RJ50	Juveniles	F	R	50	2	0.340444
	RJ50	Juveniles	F	L	51	5	1.85398
	RJ50	Juveniles	F	R	52	5	2.40717
	RJ50	Juveniles	F	L	53	3	1.0083
	RJ50	Juveniles	F	R	54	2	1.5491
	RJ50	Juveniles	F	L	55	2	1.0032
	RJ50	Juveniles	F	R	56	5	1.44202
	RJ50	Juveniles	F	L	57	3	0.665675
	RJ50	Juveniles	F	R	58	1	0.231724
	RJ50	Juveniles	F	L	59	3	0.643453
	RJ50	Juveniles	F	R	60	4	1.59285
	RJ50	Juveniles	F	L	61	7	2.17114
	RJ50	Juveniles	F	R	62	1	0.296446
	RJ50	Juveniles	F	L	63	1	0.0817073
	RJ50	Juveniles	F	R	64	1	0.211921
	RJ50	Juveniles	F	L	65	4	1.94726
	RJ50	Juveniles	F	R	66	1	0.0913152
	RJ50	Juveniles	F	L	67	3	0.767527
	RJ51	Juveniles	F	L	1	5	1.80149
	RJ51	Juveniles	F	R	2	2	1.07555
	RJ51	Juveniles	F	L	3	4	1.56698
	RJ51	Juveniles	F	R	4	3	0.89354
	RJ51	Juveniles	F	L	5	1	-0.185752
	RJ51	Juveniles	F	R	6	2	1.36695
	RJ51	Juveniles	F	L	7	4	2.00708
	RJ51	Juveniles	F	R	8	4	1.03411
	RJ51	Juveniles	F	L	9	1	0.415474
	RJ51	Juveniles	F	R	10	1	0.338058
	RJ51	Juveniles	F	L	11	1	0.0124154
	RJ51	Juveniles	F	R	12	7	2.89742
	RJ51	Juveniles	F	L	13	12	2.49465
	RJ51	Juveniles	F	R	14	7	1.44489
	RJ51	Juveniles	F	L	15	2	0.898615
	RJ51	Juveniles	F	R	16	2	0.844726
	RJ51	Juveniles	F	L	17	1	-0.767004
	RJ51	Juveniles	F	R	18	3	0.877199
	RJ51	Juveniles	F	L	19	1	0.81644
	RJ51	Juveniles	F	R	20	4	2.55708
	RJ51	Juveniles	F	L	21	2	0.319106
	RJ51	Juveniles	F	R	22	2	1.8035
	RJ51	Juveniles	F	L	23	1	-0.0856568
	RJ51	Juveniles	F	R	24	2	0.322012
	RJ51	Juveniles	F	L	25	2	0.64953
	RJ51	Juveniles	F	R	26	2	0.317646
	RJ51	Juveniles	F	L	27	1	-0.742321
	RJ51	Juveniles	F	R	28	1	0.301681
	RJ51	Juveniles	F	L	29	2	2.23874
	RJ51	Juveniles	F	R	30	2	0.464639
	RJ51	Juveniles	F	L	31	1	-0.0101054
	RJ51	Juveniles	F	R	32	1	0.150449
	RJ51	Juveniles	F	L	33	2	0.410946
	RJ51	Juveniles	F	R	34	1	-0.316053
	RJ52	Juveniles	F	R	1	2	0.437909
	RJ52	Juveniles	F	L	2	1	0.294687
	RJ52	Juveniles	F	R	3	2	0.716337
	RJ52	Juveniles	F	L	4	2	0.467608
	RJ52	Juveniles	F	R	5	2	1.59533
	RJ52	Juveniles	F	L	6	1	-0.452225
	RJ52	Juveniles	F	R	7	7	1.36629
	RJ52	Juveniles	F	L	8	5	0.914396
	RJ52	Juveniles	F	R	9	2	1.03515
	RJ52	Juveniles	F	L	10	3	1.64377
	RJ52	Juveniles	F	R	11	8	1.72786
	RJ52	Juveniles	F	L	12	1	0.0464952
	RJ52	Juveniles	F	R	13	11	2.10243
	RJ52	Juveniles	F	L	14	3	1.06896
	RJ52	Juveniles	F	R	15	3	1.36243
	RJ52	Juveniles	F	L	16	4	1.2204
	RJ52	Juveniles	F	R	17	6	1.9481
	RJ52	Juveniles	F	L	18	2	0.679882
	RJ52	Juveniles	F	R	19	3	1.14311
	RJ52	Juveniles	F	L	20	2	0.967454
	RJ52	Juveniles	F	R	21	4	1.50376
	RJ52	Juveniles	F	L	22	4	0.932778
	RJ52	Juveniles	F	R	23	1	-0.0888424
	RJ52	Juveniles	F	L	24	2	2.41945
	RJ52	Juveniles	F	R	25	1	0.151982
	RJ52	Juveniles	F	L	26	3	0.959757
	RJ52	Juveniles	F	R	27	4	2.169
	RJ52	Juveniles	F	L	28	6	1.19548
	RJ52	Juveniles	F	R	29	2	1.46835
	RJ52	Juveniles	F	L	30	1	-0.16877
	RJ52	Juveniles	F	R	31	5	1.75309
	RJ52	Juveniles	F	L	32	7	1.65518
	RJ52	Juveniles	F	R	33	1	-0.221849
	RJ52	Juveniles	F	L	34	12	1.95004
	RJ52	Juveniles	F	R	35	3	1.40262
	RJ52	Juveniles	F	L	36	2	1.7753
	RJ52	Juveniles	F	R	37	8	0.978819
	RJ52	Juveniles	F	L	38	5	1.83845
	RJ52	Juveniles	F	R	39	1	-0.106238
	RJ52	Juveniles	F	L	40	3	1.02416
	RJ52	Juveniles	F	R	41	2	0.494155
	RJ52	Juveniles	F	L	42	5	2.23571
	RJ52	Juveniles	F	R	43	2	0.812111
	RJ52	Juveniles	F	L	44	7	1.68444
	RJ52	Juveniles	F	R	45	2	1.37916
	RJ52	Juveniles	F	L	46	7	2.23835
	RJ52	Juveniles	F	R	47	1	0.310056
	RJ52	Juveniles	F	L	48	18	2.26651
	RJ53	Juveniles	F	R	1	4	1.61119
	RJ53	Juveniles	F	L	2	1	0.92153
	RJ53	Juveniles	F	R	3	3	1.06974
	RJ53	Juveniles	F	L	4	7	1.08073
	RJ53	Juveniles	F	R	5	5	1.83674
	RJ53	Juveniles	F	L	6	4	1.02755
	RJ53	Juveniles	F	R	7	3	1.9315
	RJ53	Juveniles	F	L	8	3	1.65136
	RJ53	Juveniles	F	R	9	2	1.75036
	RJ53	Juveniles	F	L	10	2	1.14718
	RJ53	Juveniles	F	R	11	7	2.96467
	RJ53	Juveniles	F	L	12	4	1.76481
	RJ53	Juveniles	F	R	13	1	0.570309
	RJ53	Juveniles	F	L	14	3	2.3495
	RJ53	Juveniles	F	R	15	1	0.0182843
	RJ53	Juveniles	F	L	16	2	0.507991
	RJ53	Juveniles	F	R	17	4	2.20218
	RJ53	Juveniles	F	L	18	5	2.31542
	RJ53	Juveniles	F	R	19	4	2.50371
	RJ53	Juveniles	F	L	20	2	0.31534
	RJ53	Juveniles	F	R	21	4	2.85968
	RJ53	Juveniles	F	L	22	3	1.4034
	RJ54	Juveniles	F	L	1	2	1.01136
	RJ54	Juveniles	F	R	2	7	0.947336
	RJ54	Juveniles	F	L	3	8	2.2236
	RJ54	Juveniles	F	R	4	2	0.585686
	RJ54	Juveniles	F	L	5	6	1.24996
	RJ54	Juveniles	F	R	6	2	0.895423
	RJ54	Juveniles	F	L	7	7	1.4136
	RJ54	Juveniles	F	R	8	1	0.387923
	RJ54	Juveniles	F	L	9	7	1.07011
	RJ54	Juveniles	F	R	10	5	1.90066
	RJ54	Juveniles	F	L	11	15	2.47551
	RJ54	Juveniles	F	R	12	2	0.690993
	RJ54	Juveniles	F	L	13	9	2.3949
	RJ54	Juveniles	F	R	14	3	0.463893
	RJ54	Juveniles	F	L	15	3	0.400192
	RJ54	Juveniles	F	R	16	3	0.285107
	RJ54	Juveniles	F	L	17	1	0.146128
	RJ54	Juveniles	F	R	18	1	0.0549959
	RJ54	Juveniles	F	L	19	3	1.20148
	RJ54	Juveniles	F	R	20	1	0.155032
	RJ54	Juveniles	F	L	21	4	2.85303
	RJ54	Juveniles	F	R	22	3	0.80956
	RJ54	Juveniles	F	L	23	5	1.81678
	RJ54	Juveniles	F	R	24	4	2.58028
	RJ54	Juveniles	F	L	25	4	2.00418
	RJ54	Juveniles	F	R	26	1	0.12156
	RJ54	Juveniles	F	L	27	3	1.31925
	RJ54	Juveniles	F	R	28	1	-0.286509
	RJ54	Juveniles	F	L	29	1	-0.530178
	RJ55	Juveniles	F	L	1	4	1.46607
	RJ55	Juveniles	F	R	2	6	1.72852
	RJ55	Juveniles	F	L	3	6	1.17357
	RJ55	Juveniles	F	R	4	6	1.36709
	RJ55	Juveniles	F	L	5	5	1.03563
	RJ55	Juveniles	F	R	6	3	1.12343
	RJ55	Juveniles	F	L	7	2	0.894538
	RJ55	Juveniles	F	R	8	2	1.5539
	RJ55	Juveniles	F	L	9	1	0.643749
	RJ55	Juveniles	F	R	10	2	0.946894
	RJ55	Juveniles	F	L	11	9	2.19301
	RJ55	Juveniles	F	R	12	2	0.320769
	RJ55	Juveniles	F	L	13	7	1.80439
	RJ55	Juveniles	F	R	14	1	0.335257
	RJ55	Juveniles	F	L	15	2	0.883945
	RJ55	Juveniles	F	R	16	4	1.50447
	RJ55	Juveniles	F	L	17	12	2.09809
	RJ55	Juveniles	F	R	18	10	1.15785
	RJ55	Juveniles	F	L	19	10	1.33379
	RJ55	Juveniles	F	R	20	6	1.31214
	RJ55	Juveniles	F	L	21	6	1.29983
	RJ55	Juveniles	F	R	22	6	1.60134
	RJ55	Juveniles	F	L	23	1	0.478133
	RJ55	Juveniles	F	R	24	2	0.46568
[truncated: 876 more rows]
