# Supplementary material for: Maturation of cortical input to dorsal raphe nucleus increases behavioral persistence in mice
Source: eLife. 2024 Mar 13;13:e93485. doi: 10.7554/eLife.93485 (PMC10994666; doi:10.7554/eLife.93485)
Supplement: Figure 3—figure supplement 1—source data 1. [file elife-93485-fig3-figsupp1-data1.xlsx]

## Sheet: Fig s4B
Normalized tdTomato intensities
0.150738	0.183338	0.233427	0.22253	0.328529	0.316632	0.129914	0.0817344	0.050923	0.0472705	0.065821	0.0838107	0.143388	0.278091	0.283108	0.246825	0.222697	0.182747	0.140948	0.111182
0.173002	0.231472	0.255797	0.316162	0.434603	0.282213	0.131187	0.0750053	0.0444515	0.0449517	0.0646692	0.0855839	0.108302	0.256434	0.368691	0.308524	0.270968	0.224	0.186839	0.13734
0.199085	0.232791	0.255464	0.30966	0.401322	0.281425	0.129096	0.0793701	0.0483162	0.0444818	0.0745809	0.0959807	0.102331	0.271635	0.42404	0.328196	0.282062	0.252357	0.21468	0.152905
0.205905	0.257343	0.275787	0.33638	0.419751	0.374542	0.205056	0.109409	0.0712164	0.0627444	0.101209	0.124625	0.132536	0.373041	0.492392	0.352536	0.287018	0.277379	0.239262	0.175275
0.214559	0.252645	0.284365	0.336031	0.385484	0.491346	0.296839	0.178458	0.0919039	0.0355097	0.087054	0.167909	0.271301	0.550044	0.457807	0.32818	0.298233	0.276651	0.255418	0.191749
0.233943	0.283865	0.301643	0.34717	0.339744	0.462444	0.479449	0.229532	0.105438	0.0380558	0.0285684	0.199767	0.460459	0.595041	0.396532	0.313479	0.284578	0.277394	0.256691	0.202767
0.224743	0.263254	0.286457	0.290519	0.319132	0.461232	0.567276	0.439226	0.217999	0.0974811	0.148935	0.46102	0.619987	0.543694	0.374723	0.309206	0.278197	0.284835	0.29167	0.241323
0.229017	0.253312	0.251493	0.270589	0.328074	0.427708	0.578476	0.69378	0.566124	0.479979	0.604786	0.69087	0.630308	0.545406	0.386878	0.32615	0.285078	0.286699	0.290291	0.234428
0.248841	0.268467	0.256267	0.28673	0.345534	0.439605	0.545406	0.63822	0.685157	0.709815	0.708769	0.671486	0.678109	0.584932	0.418675	0.358628	0.3325	0.337153	0.307447	0.19472
0.255373	0.303552	0.316162	0.374557	0.47519	0.563108	0.70933	0.732457	0.725546	0.765588	0.732442	0.748553	0.766648	0.789534	0.595784	0.491164	0.469386	0.411461	0.366736	0.3233
0.344215	0.426616	0.495847	0.591161	0.691492	0.841699	0.95376	0.897245	0.717711	0.691673	0.680489	0.876951	0.934528	0.97272	0.848337	0.784684	0.730108	0.610424	0.564548	0.445728
0.399154	0.49265	0.582022	0.745461	0.813798	0.886151	0.970916	0.854203	0.607863	0.565882	0.59395	0.821588	0.972523	1	0.983662	0.936725	0.861038	0.737686	0.652178	0.492695
0.285032	0.341154	0.460444	0.544452	0.746673	0.795611	0.79111	0.714301	0.606681	0.546301	0.622215	0.701873	0.876739	0.955139	0.947622	0.845428	0.69478	0.665469	0.535676	0.415053
0.223485	0.279849	0.359128	0.387788	0.500667	0.528432	0.559653	0.604044	0.585842	0.578976	0.561092	0.627277	0.691916	0.726531	0.681928	0.601937	0.510533	0.480919	0.445925	0.439302
0.216862	0.240914	0.297657	0.330257	0.304916	0.285002	0.326089	0.439377	0.585281	0.610924	0.527204	0.561562	0.524173	0.579582	0.549407	0.494696	0.466021	0.420766	0.410082	0.386272
0.175851	0.222167	0.25513	0.280107	0.280198	0.218393	0.185626	0.249947	0.516201	0.542981	0.477797	0.390697	0.280061	0.315359	0.384226	0.466946	0.436953	0.395578	0.355127	0.313358
0.147464	0.204525	0.235019	0.254312	0.232291	0.213907	0.174654	0.192037	0.383635	0.532479	0.429905	0.259268	0.206268	0.312222	0.293459	0.342836	0.325149	0.310282	0.269013	0.21271
0.110409	0.149223	0.190885	0.186763	0.20886	0.222803	0.237913	0.221803	0.385848	0.567109	0.502258	0.241536	0.248628	0.314116	0.257222	0.263284	0.255267	0.232078	0.224501	0.168303
0.0903731	0.141251	0.164954	0.164818	0.15089	0.189127	0.224804	0.238201	0.442742	0.573399	0.585493	0.329469	0.307796	0.28094	0.23711	0.244749	0.240369	0.210815	0.183702	0.124928
0.0651996	0.0952078	0.11297	0.114759	0.116789	0.128535	0.194356	0.240005	0.325589	0.381149	0.423206	0.386651	0.256919	0.207602	0.168061	0.193735	0.180519	0.143297	0.128353	0.0915553

## Sheet: Fig s4C
Control-Caspase Neun densities
4.8	0	-8.8	-0.8	-0.8	-2.4	-0.8	0	0	0	0	0	0.8	0	2.4	1.6	3.2	1.6	4.8	0.8
-11.2	6.4	-10.4	-7.2	-6.4	-3.2	3.2	0	0	0	0	0	0	1.6	-2.4	-3.2	5.6	-1.6	-2.4	-1.6
-8.8	-7.2	-4	-0.8	-4.8	2.4	-2.4	4	0	0	0	0.8	0.8	-3.2	2.4	7.2	-2.4	-0.8	-1.6	-4.8
0	0.8	-1.6	6.4	4.8	-3.2	-4.8	4	-0.8	0	2.4	-1.6	2.4	6.4	6.4	-0.8	4	-2.4	2.4	-6.4
10.4	3.2	1.6	7.2	3.2	4	-1.6	-1.6	-0.8	-5.6	1.6	3.2	4.8	4	4	7.2	4	4.8	5.6	-5.6
3.2	8	0	-1.6	8.8	5.6	-4	1.6	4.8	-2.4	0.8	6.4	4.8	8	-2.4	4.8	1.6	9.6	4	-4
8	3.2	-5.6	7.2	0.8	2.4	-2.4	-7.2	0	4.8	4.8	4.8	5.6	-3.2	0	1.6	-4	-1.6	9.6	7.2
6.4	4.8	-3.2	8	0	-8	-5.6	2.4	0	-1.6	3.2	-5.6	-7.2	0	-0.8	0	1.6	0.8	1.6	-5.6
2.4	0.8	-3.2	-2.4	-4	-0.8	-4.8	-3.2	-4.8	-5.6	1.6	-1.6	-3.2	-9.6	-2.4	-2.4	0	-8.8	-3.2	3.2
0	0	5.6	4.8	-1.6	2.4	-0.8	4.8	4.8	1.6	4.8	2.4	-8	-3.2	-8	-1.6	-2.4	-1.6	6.4	-0.8
-4	0.8	0	-4.8	0	-0.8	0	3.2	0	3.2	6.4	2.4	-5.6	-6.4	2.4	-0.8	1.6	-1.6	-3.2	1.6
4	0.8	-8.8	0.8	-4	-3.2	3.2	-0.8	-0.8	0.8	1.6	-7.2	-6.4	0	-11.2	4.8	2.4	4.8	-1.6	0.8
-4.8	0.8	-0.8	-10.4	8.8	-0.8	-3.2	-3.2	-2.4	0	-4	-1.6	5.6	-3.2	-4	6.4	0	4.8	-0.8	-0.8
-3.2	-3.2	3.2	3.2	2.4	-5.6	-1.6	-3.2	-1.6	3.2	4	-1.6	-0.8	-3.2	0.8	2.4	-3.2	-1.6	-6.4	-1.6
0.8	5.6	1.6	-11.2	-1.6	-2.4	3.2	-10.4	-8	-4	-6.4	-4	3.2	2.4	-3.2	2.4	6.4	-0.8	-0.8	4.8
-4	-4.8	1.6	-0.8	-6.4	0.8	6.4	2.4	-8	-8	4	2.4	1.6	2.4	0	-4.8	3.2	-2.4	-5.6	0
-4	5.6	-5.6	-4	-1.6	1.6	0	7.2	-2.4	-10.4	-3.2	4.8	-4	0.8	-0.8	-4.8	-2.4	-3.2	-3.2	1.6
0	2.4	0.8	-1.6	-4	0	-7.2	-3.2	-6.4	-0.8	-4	-1.6	-1.6	-0.8	0.8	3.2	-3.2	-0.8	2.4	-2.4
3.2	-5.6	-1.6	-5.6	0.8	-4	-5.6	-7.2	-7.2	-10.4	-6.4	0	-3.2	-0.8	-1.6	2.4	-1.6	0	-3.2	0
-2.4	-0.8	-1.6	0	-2.4	-0.8	-0.8	0.8	-4	-6.4	-4	0.8	-2.4	0	-0.8	2.4	2.4	-5.6	-4.8	-3.2
