# Supplementary material for: Maturation of cortical input to dorsal raphe nucleus increases behavioral persistence in mice
Source: eLife. 2024 Mar 13;13:e93485. doi: 10.7554/eLife.93485 (PMC10994666; doi:10.7554/eLife.93485)
Supplement: Figure 3—figure supplement 2—source data 1. [file elife-93485-fig3-figsupp2-data1.xlsx]

## Sheet: Fig S5B
tdTomato Neurons per Layer V bin
MO	PR/IL	AC	Rs	TeA
1.3125	3.8182	3.6364	0.125	0
0.375	3.6364	3.6364	0	0
0.875	2	1.3636	0.3125	0.5625
1.375	3.3636	1.3636	0	0
4.1875	1.4545	1.6364	0.0909	0
4.8125	3.3636	1.1818	0	0.3125
3.625	3.4545	1.4545	0.4545	0.5625
0.9375	3.7273	2.0909	0.5625	0

## Sheet: Fig S5C
Medial Orbitofrontal Cortex (MO)
Caspase-Control Neun+ Neurons per bin
0.1875	-0.208333	0.3875	0.825	1.9	1.6625	1.1375	1.2875	0.4625	-0.125	0.3	0.15	-0.2625	0.2	-0.2875	-0.85	-0.9625	-0.8	-0.9375	-1.175	-1.4625	-0.3	-1.55	-1.7125	-2.475	-2.0125	-3.575	-2.35	-2.3125	-0.3625	-0.2625	0.525	-0.45	-1.5375	-3.5375	-4.125	-4.275	-3	-1.2125	0.025	0.1	1.175	0.9	1.3875	0.95	2.425	2.1875	2.525	2.85417	2.8125
-0.3125	-0.208333	0.7875	2.625	4	4.1625	3.5375	3.5875	1.5625	0.275	-0.6	-1.05	-1.8625	-2.2	-1.9875	-0.25	0.5375	0.7	0.4625	-0.175	-2.2625	-2.7	-3.45	-2.6125	-2.475	-1.2125	-1.575	-0.95	-1.0125	-0.7625	-1.4625	-0.875	-0.65	0.5625	0.4625	0.675	-0.175	-0.7	-1.6125	-2.475	-2.5	-1.925	-0.8	-1.2125	-0.35	0.125	0.7875	0.825	1.6875	2.8125
0.6875	0.291667	-0.1125	-0.575	-1.2	-1.8375	-2.6625	-2.4125	-1.5375	-1.425	-0.7	-0.15	-0.1625	-1	-0.2875	-0.95	-0.9625	-0.5	-1.0375	-1.575	-0.6625	-1.4	-2.15	-1.3125	-1.575	-2.3125	-1.675	-1.65	-1.3125	-0.4625	-0.5625	-0.575	-1.05	-1.7375	-1.2375	-2.025	-1.875	-1.2	-1.7125	-3.475	-3.5	-3.925	-4.5	-4.7125	-4.85	-3.875	-5.0125	-5.075	-4.64583	-5.1875
-0.3125	-0.375	-0.4125	-0.975	-1.6	-2.1375	-2.8625	-3.2125	-2.5375	-1.425	-0.7	0.15	0.4375	0.2	-0.2875	-0.65	-1.8625	-2.3	-2.9375	-2.975	-3.1625	-2	-1.95	-1.6125	-2.675	-2.6125	-2.575	-0.85	0.6875	2.0375	1.9375	1.825	0.25	-2.5375	-3.3375	-4.325	-4.575	-4.3	-2.3125	-2.275	-0.7	-0.525	-0.1	0.0875	0.15	0.525	0.3875	0.525	1.02083	1.3125
0.1875	-0.0416667	0.4875	0.425	1.3	1.7625	1.6375	1.1875	1.1625	0.475	0.5	0.25	1.0375	1.8	1.6125	0.85	1.6375	1.2	0.8625	1.025	1.0375	-1.11022e-16	0.25	-0.2125	-0.875	-0.7125	0.025	1.05	1.5875	2.1375	2.0375	1.025	-0.45	0.0625	0.2625	1.275	2.225	2.3	2.3875	1.625	0.9	0.875	1.7	1.3875	1.65	2.425	1.4875	1.225	1.02083	2.3125
0.6875	0.291667	0.3875	0.625	1.4	1.1625	1.9375	1.1875	0.4625	-0.725	-0.7	-1.75	-0.9625	-0.5	-0.0875	-0.15	0.0375	-0.8	-0.9375	-1.075	-0.7625	0.4	0.85	1.4875	1.725	0.8875	-0.475	0.05	-1.1125	-1.0625	-0.9625	-0.375	-1.25	0.2625	-0.0375	0.375	1.125	1.8	1.3875	2.025	2.7	2.175	2.8	2.5875	2.15	1.725	1.4875	0.625	0.520833	0.3125
0.1875	-0.208333	-0.5125	0.225	0.3	0.8625	0.2375	1.5875	0.7625	0.775	-1.11022e-16	0.15	-1.4625	-2.2	-3.1875	-3.85	-4.2625	-4.1	-4.1375	-3.675	-3.5625	-3.2	-3.25	-3.0125	-3.375	-2.8125	-2.875	-2.35	-1.9125	-0.9625	-1.1625	-1.475	-3.15	-3.3375	-3.5375	-2.525	-0.975	1.8	2.5875	2.425	1.6	1.275	0.5	0.0875	-0.45	1.125	0.1875	0.225	1.6875	1.3125
tdTomato Neurons per bin
0.1	0.1	0.1	0.1	0.1	0.1	0	0	0.1	0.1	0.1	0.1	0.1	0.1	0.1	0.2	0.2	0.3	0.4	0.7	0.9	1.2	1.3	1.4	1.4	1.1	0.8	0.9	1	0.9	0.9	0.9	0.6	0.2	0.1	0.1	0.1	0.2	0.3	0.4	0.4	0.5	0.6	0.6	0.8	0.8	0.8	0.9	0.7	1.1
0	0	0	0	0	0	0	0	0	0	0	0	0	0	0	0.1	0.1	0.4	0.6	0.8	0.9	1.1	0.9	1.2	1.2	1.1	0.9	0.9	0.7	0.8	1.2	1.3	1.6	1.6	1.8	1.5	1.6	1.4	1.6	1.6	1.7	1.6	1.8	1.5	1.3	1.1	0.9	0.8	0.7	1.4
0	0	0	0	0	0	0	0.1	0.1	0.1	0.1	0.1	0	0.1	0.1	0.4	0.6	0.8	1.1	1.5	1.6	1.7	2.3	2.5	2.7	2.8	2.8	2.5	2.6	2.6	2.6	2.6	2.4	2.2	1.6	1.4	1.4	1.4	1.1	1.3	1.4	1.3	1.3	1.1	0.9	0.9	1	1.1	1.5	1.8
0	0	0	0	0	0	0	0	0.1	0.2	0.4	0.8	1.1	1.4	1.6	2.2	2.7	3.1	3.4	3.9	3.9	3.8	3.9	3.9	3.4	3.4	2.8	2.4	2.1	1.8	1.3	1.1	0.8	0.7	0.6	0.6	0.6	0.4	0.2	0.3	0.1	0.1	0.1	0.1	0	0	0	0.1	0.2	0.7
0.1	0.1	0.1	0.2	0.1	0.2	0.2	0.2	0.1	0.1	0	0	0	0	0	0	0.1	0.1	0.1	0.1	0.2	0.3	0.5	0.6	0.9	0.9	0.9	0.9	0.8	0.6	0.6	0.4	0.6	0.5	0.6	0.5	0.7	0.4	0.7	0.7	0.6	0.8	0.9	0.7	0.6	0.6	0.2	0.4	0.5	1.4
0	0	0	0	0	0	0	0	0	0	0	0	0	0	0	0	0	0	0	0	0	0.2	0.3	0.4	0.6	0.8	0.7	1.1	1	1.2	1.4	1.4	1.1	1.3	1.1	1.1	1.3	1.4	1.4	1.4	1.5	1.5	1.5	1.4	1.6	1.4	1.2	1.2	1.2	1.8
0	0	0	0	0	0	0.1	0.1	0.1	0.2	0.2	0.1	0.2	0.2	0.4	0.6	0.9	1.1	1.8	2.1	2.9	3.6	3.7	3.9	4.2	4.3	4.1	4.4	4.1	3.4	3	2.4	1.8	1.5	1.4	1.1	1.2	1.4	1.5	1.9	1.9	2	1.9	2	1.7	1.8	1.8	1.9	2	2.1
0	0	0	0	0	0	0	0	0	0.1	0.1	0.3	0.4	0.4	0.6	0.6	0.9	1.2	1.4	1.6	1.9	1.9	1.9	2.1	1.7	1.5	1.4	1.1	0.9	1.1	1.6	1.7	1.7	1.9	2.2	2.1	2.6	2.9	3.2	3.3	3.4	3.1	2.9	2.6	2.1	1.7	1.3	1.3	1	1.4
Bin depth (microns)
0	16	32	48	64	80	96	112	128	144	160	176	192	208	224	240	256	272	288	304	320	336	352	368	384	400	416	432	448	464	480	496	512	528	544	560	576	592	608	624	640	656	672	688	704	720	736	752	768	784
[truncated: 1 more columns]

## Sheet: Fig S5D
Prelimbic/Infralimbid Cortex (PL/IL)
Caspase-Control Neun+ Neurons per bin
0.625	0.8125	1.0625	1.4875	2.025	2.5375	3.4875	3.6625	2.775	2.85	2.35	1.95	2.175	2.875	2.5375	2.125	1.85	1.4125	1.0375	1.05	1.3875	1.4	1.2375	0.85	-0.0875	-0.7625	-1.85	-1.875	-1.2	-0.1125	0.2625	0.9875	1.25	0.75	0.1375	0.5	0.4875	0.075	1.4	2.1	3.05	4.0125	4.4	4.475	3.7625	2.7125	2.1125	1.9875	1.5625	1.75
-0.375	-0.1875	-0.6375	-0.6125	-0.675	-0.5625	0.8875	1.0625	1.375	1.05	0.65	0.25	-0.325	-0.625	-0.0625	0.225	-0.85	-0.5875	-0.5625	-0.75	-1.2125	-0.2	-0.0625	-1.45	-1.4875	-2.1625	-3.05	-3.675	-2.7	-2.2125	-1.4375	-1.7125	-1.65	-1.95	-2.7625	-2.8	-1.7125	-0.025	1	1.5	2.75	1.2125	-0.2	-0.425	-0.9375	-2.2875	-0.9875	-1.1125	-1.27083	-2.75
0.125	-0.0208333	-0.1375	-0.4125	-0.175	-0.5625	-0.1125	-0.2375	0.475	1.15	1.85	1.75	1.575	1.075	0.7375	-0.175	-0.55	-0.6875	-1.2625	-1.65	-1.3125	-1.4	-0.9625	-0.95	-1.5875	-1.1625	-1.05	-1.075	-0.3	-0.0125	-1.1375	-0.9125	-1.25	-1.95	-2.5625	-1.9	-2.4125	-2.625	-1.7	-0.1	0.25	0.2125	0.3	-1.125	-2.9375	-4.4875	-5.0875	-5.9125	-6.27083	-5.75
-0.375	-0.0208333	0.0625	-0.1125	-0.375	-0.9625	-1.3125	-1.7375	-1.825	-1.75	-0.85	0.05	0.575	0.875	1.2375	0.325	-0.95	-0.6875	-1.7625	-1.45	-2.2125	-1.6	-2.8625	-2.45	-4.4875	-3.6625	-4.15	-3.575	-3.7	-2.8125	-3.3375	-3.5125	-3.95	-3.75	-3.7625	-2.6	-3.0125	-2.425	-2.3	-1.3	-1.65	-1.9875	-2.9	-3.725	-4.9375	-5.7875	-5.1875	-5.4125	-5.27083	-6.25
0.125	-0.1875	-0.5375	-1.0125	-1.375	-1.5625	-2.1125	-3.1375	-3.225	-3.15	-2.05	-1.25	0.475	1.475	1.7375	1.325	1.15	0.4125	-0.5625	-0.35	-1.8125	-1.8	-1.9625	-1.45	-2.6875	-2.3625	-2.25	-3.175	-3.3	-2.5125	-2.3375	-2.9125	-1.85	-2.15	-2.5625	-1.9	-1.8125	-1.925	-1	-0.2	0.55	0.9125	0.7	-0.725	-1.6375	-3.3875	-4.5875	-5.6125	-6.4375	-7.25
-0.375	-0.354167	0.1625	-0.1125	0.025	0.2375	0.7875	1.5625	2.475	3.45	2.45	2.95	1.675	1.075	0.3375	0.625	-0.75	-0.0875	-0.7625	-0.95	-0.9125	-0.9	-1.9625	-1.55	-1.8875	-2.8625	-3.05	-2.375	-2.7	-3.3125	-1.5375	-2.5125	-2.15	-2.05	-1.9625	-3.3	-2.5125	-3.725	-3.4	-1.1	-0.15	0.1125	1	0.275	-2.2375	-2.7875	-3.7875	-4.6125	-4.4375	-3.25
-0.375	-0.520833	-0.6375	-0.7125	-0.475	-0.6625	-0.4125	-0.4375	-1.325	-1.45	-0.95	-0.85	-1.225	-0.525	-0.7625	-1.175	-1.05	-0.5875	-0.6625	0.05	-0.2125	0.2	-0.0625	0.35	-0.9875	-1.1625	-1.15	-1.475	-1.8	-1.6125	-2.2375	-3.2125	-3.55	-5.25	-7.0625	-7.1	-7.8125	-7.425	-5.2	-2.5	-1.95	-0.5875	-0.2	-0.325	-0.1375	0.1125	-0.4875	-0.9125	-2.27083	-2.75
tdTomato Neurons per bin
0.4	0.2	0.2	0.1	0.1	0.1	0.1	0.1	0.1	0	0	0	0	0	0	0	0	0	0	0	0	0.1	0.2	0.2	0.2	0.2	0.2	0.2	0.4	0.8	1.3	1.6	1.9	2.7	3.4	3.7	3.9	4.1	3.9	3.2	2.6	2.7	2.5	1.8	1.6	1.8	1.5	1.3	1.6	1
0.2	0.2	0.2	0.2	0.2	0	0	0.1	0.2	0.2	0.3	0.4	0.3	0.2	0.2	0.1	0	0	0	0.1	0.1	0.2	0.2	0.3	0.3	0.3	0.4	0.6	1	1	1.2	1.8	2.3	2.7	3.5	4.4	4	4.2	3.8	3.8	3.1	3	2.5	2.3	1.8	1.9	2	1.9	2	1.5
0.3	0.3	0.4	0.4	0.4	0.1	0.1	0	0	0	0	0	0	0.1	0.1	0.1	0.1	0.1	0	0	0	0	0.1	0.2	0.2	0.3	0.8	1.1	2.1	2.9	3.5	4.3	4.8	4.8	4.5	4.7	4.3	4.1	3.5	3.5	2.9	2	1.8	1.4	1	0.9	1.1	0.8	1	1
0.3	0.1	0.1	0.1	0.1	0.1	0.1	0.1	0.1	0	0	0	0	0	0.3	0.6	0.6	0.6	0.6	0.3	0.2	0.2	0.4	0.4	0.7	0.9	1.5	1.7	2.8	3.4	3.6	4	4.6	4.5	4.5	5.2	5.1	4.6	4.3	3.9	3	2.5	2.1	1.6	1.3	1	0.6	0.7	0.5	1
0.5	0.4	0.3	0.3	0.1	0.1	0.1	0.2	0.2	0.3	0.2	0.2	0.2	0.3	0.2	0.2	0.2	0.1	0	0	0	0.3	0.3	0.4	0.4	0.4	0.3	0.3	0.4	0.6	1.4	1.4	1.7	2.2	3.1	3	3.6	4.1	4.5	4.1	4.2	4.4	3.8	3.5	3.1	2.7	1.9	1.9	1.3	1
0	0	0.1	0.1	0.1	0.2	0.2	0.2	0.3	0.3	0.2	0.2	0.1	0	0	0	0	0.1	0.2	0.4	0.4	0.5	0.5	0.4	0.3	0.3	0.2	0.4	0.7	1.4	1.7	2	2.4	2.6	2.8	3.4	3.8	3.6	3.2	2.5	2	1.5	1.6	1.8	1.9	1.7	1.8	1.5	1.3	1.5
0	0	0	0	0	0.1	0.1	0.1	0.1	0.1	0	0	0	0	0	0	0	0.1	0.1	0.1	0.1	0.4	0.8	1	1.3	2.2	2.6	3.4	4.4	4.9	5.2	5.2	4.9	4.3	4.3	3.8	3.3	2.8	2.6	2.1	1.6	1.8	1.5	1.4	1.4	1.3	1	1	0.6	1
0.3	0.4	0.4	0.4	0.2	0.2	0.1	0.1	0.1	0.1	0.2	0.1	0.3	0.6	0.6	0.5	0.5	0.3	0.2	0.4	0.5	0.7	1	1.1	1.2	1.6	2.2	2.3	2.6	2.6	2.8	2.2	2.8	3.1	3.8	4	4.9	4.7	4.5	4.4	3.6	2.7	2.2	2	1.5	1.4	1.3	1.3	0.6	1.5
Bin depth (microns)
0	16	32	48	64	80	96	112	128	144	160	176	192	208	224	240	256	272	288	304	320	336	352	368	384	400	416	432	448	464	480	496	512	528	544	560	576	592	608	624	640	656	672	688	704	720	736	752	768	784
[truncated: 1 more columns]

## Sheet: Fig S5E
Anterior Cingulate Cortex (AC)
Caspase-Control Neun+ Neurons per bin
-0.375	0.104167	0.6	0.925	1.5	1.8125	1.8	1.875	2.2375	2	2.4875	2.1125	1.525	0.6625	0.1625	-1.8125	-2.0875	-3.1125	-3.125	-3.625	-2.85	-2.3125	-1.675	-2.225	-2.7	-2.4875	-3.15	-2.925	-3.7875	-3.225	-3.225	-2.225	-2.9125	-1.425	-1.4625	-2.2	-3.7	-4.225	-4.875	-4.925	-3.6375	-2.2875	-0.4125	0.65	1.725	1.6625	1.7875	2.075	2.22917	2.8125
-0.375	0.270833	0.3	0.225	0.3	0.4125	0.9	1.175	2.1375	2.2	2.1875	1.5125	0.425	-1.1375	-1.1375	-1.0125	-1.5875	-1.2125	-1.225	-1.925	-2.45	-2.1125	-2.375	-1.625	-1.5	-2.2875	-2.35	-2.925	-3.0875	-3.325	-2.825	-2.325	-1.2125	-1.225	-1.4625	-1.4	-0.7	-1.225	-1.375	-1.125	-1.4375	-3.0875	-2.9125	-2.15	-1.475	-0.3375	1.7875	2.475	3.22917	1.8125
-0.375	-0.395833	-0.3	-0.275	-0.4	-0.3875	-0.8	-1.125	-0.3625	-0.1	1.0875	1.1125	-0.175	-0.4375	-1.9375	-3.7125	-3.8875	-3.3125	-3.725	-2.825	-3.45	-3.3125	-2.475	-3.025	-3	-2.8875	-2.45	-3.025	-3.2875	-2.625	-1.425	-1.825	-1.1125	-0.625	-0.5625	-1.2	-1.3	-2.325	-2.075	-2.525	-1.8375	-0.4875	0.6875	0.85	1.225	0.4625	-0.6125	-1.125	-2.27083	-2.1875
-0.375	0.270833	-0.1	-0.175	-0.3	-0.2875	0	-0.225	0.4375	0.1	-0.3125	-1.2875	-0.075	-1.2375	-0.9375	-0.4125	-0.2875	-0.8125	0.175	-0.525	-0.95	-0.7125	-1.475	-2.125	-2.1	-2.0875	-1.85	-1.725	-2.6875	-1.825	-1.625	-1.725	-1.8125	-0.625	-0.7625	-1.5	-1.1	-0.325	-0.875	-0.825	0.0625	-0.7875	-1.5125	-0.65	-0.375	-0.3375	0.7875	0.375	-0.604167	-4.6875
-0.375	-0.395833	-0.6	-0.675	-0.7	-0.6875	-0.4	0.175	0.3375	0.4	0.3875	0.4125	0.425	1.0625	1.3625	0.5875	0.2125	-0.6125	-1.225	-0.725	-0.35	-0.1125	1.125	1.475	1.1	1.3125	0.15	-0.625	-1.1875	-0.825	-0.025	0.575	1.0875	1.575	0.9375	0.8	1.9	1.375	2.025	2.775	2.3625	2.7125	2.5875	1.35	0.225	0.1625	-1.0125	-1.125	-0.9375	-1.6875
-0.375	-0.229167	0.3	0.125	0.3	0.5125	-0.4	-0.725	-0.4625	-0.7	-0.7125	-0.4875	0.025	-0.5375	-0.7375	-0.5125	-0.3875	-1.4125	-1.125	-1.225	-2.05	-2.3125	-1.475	-1.725	-1.1	-0.9875	-0.75	-0.925	-1.1875	-2.025	-1.525	-0.925	-0.8125	0.075	1.1375	1.1	0.8	0.675	0.925	0.075	0.0625	-0.4875	-0.8125	-1.75	-2.075	-2.9375	-3.7125	-3.325	-3.4375	-0.1875
-0.375	-0.5625	-0.6	-0.375	-0.5	-0.9875	-1.1	-1.625	-2.1625	-3.3	-2.7125	-2.1875	-1.375	-1.4375	-0.1375	-0.4125	-1.3875	-2.1125	-0.925	-2.025	-1.55	-0.3125	-0.375	-0.925	-0.7	-0.6875	-1.75	-1.625	-2.7875	-1.625	-2.225	-2.225	-3.8125	-3.725	-4.7625	-4.7	-4.7	-3.225	-2.075	-1.825	-1.4375	-0.7875	0.0875	-0.05	0.625	0.4625	0.3875	-0.425	-1.10417	-2.6875
tdTomato Neurons per bin
0	0	0	0	0	0	0	0	0	0	0	0	0	0	0	0	0	0	0	0	0	0	0.1	0.3	0.4	0.9	1.1	1.5	1.6	1.9	1.9	2.4	2.6	3	3.3	3.3	3.1	2.6	2	1.7	1.2	0.9	0.7	0.6	0.2	0.3	0.2	0.5	0.8	1.5
0.1	0.1	0.1	0.1	0.2	0.1	0.1	0.1	0.1	0	0	0	0	0	0	0	0	0	0	0	0	0	0	0	0.1	0.4	0.4	0.4	0.7	0.6	0.6	0.8	1.3	1.4	1.6	1.9	2	1.7	1.7	1.7	1.3	1.3	1.5	1.2	1.5	1.6	1.4	1.4	1.3	2
0	0	0	0	0.1	0.1	0.1	0.1	0.1	0	0.1	0.1	0.1	0.1	0.1	0	0	0	0	0.1	0.1	0.2	0.2	0.3	0.4	0.7	1	1.4	2.3	2.4	2.3	2.6	2.5	2.4	2.3	2.8	2.6	2.4	2	1.9	1.4	1.1	1.4	1	1.1	1.2	1.2	1.1	1.3	1.5
0	0	0	0	0	0	0	0	0	0	0	0.1	0.1	0.1	0.2	0.2	0.2	0.3	0.4	0.6	0.9	1.2	1.5	2	2.1	2.1	2.5	2.7	2.4	2.6	2.8	2.3	1.9	2.3	2	1.5	1.4	1.4	0.9	0.6	0.6	0.5	0.3	0.3	0.3	0.4	0.3	0.5	0.5	1
0	0	0	0	0.1	0.1	0.1	0.2	0.2	0.1	0.1	0.1	0	0.1	0.1	0.1	0.1	0.1	0	0.1	0.1	0.1	0.2	0.2	0.1	0.1	0.1	0.1	0.1	0.2	1	1.4	2	2.6	3.6	4	4.1	4.1	4.3	4.2	3.3	3.2	3.2	2.6	1.9	1.9	1.6	1.3	1.3	2
0.2	0.1	0	0	0	0	0	0	0	0	0	0	0	0	0	0	0	0	0	0	0	0	0	0	0	0	0	0.3	0.3	0.4	0.4	0.5	0.6	0.9	1.1	1.2	1.2	0.9	0.7	0.4	0.4	0.7	0.6	0.6	0.6	0.6	0.2	0.4	0.5	1
0	0	0	0	0	0	0	0	0	0	0	0	0	0	0	0	0	0.1	0.2	0.6	0.9	1.4	2.1	2.2	2.2	2.9	2.6	2.1	2.4	2.6	1.9	2.7	2.9	2.9	2.4	2.4	1.5	1.1	0.7	0.6	0.4	0.4	0.4	0.3	0.4	0.5	0.4	0.5	0.6	1
0.1	0.1	0.1	0.1	0.1	0	0	0	0	0	0	0	0	0	0	0	0	0	0	0	0	0	0	0	0	0	0	0	0	0	0	0	0	0.1	0.3	0.6	1.2	1.6	1.8	1.8	2.1	2.2	2.3	2.7	2.8	2.2	1.5	1.2	0.3	1
Bin depth (microns)
0	16	32	48	64	80	96	112	128	144	160	176	192	208	224	240	256	272	288	304	320	336	352	368	384	400	416	432	448	464	480	496	512	528	544	560	576	592	608	624	640	656	672	688	704	720	736	752	768	784
Primary Motor Cortex (M1)
Caspase-Control Neun+ Neurons per bin
-0.21875	-0.0833333	-0.275	-0.26875	-0.1125	-0.1125	-0.00625	0.05625	0.1375	-0.03125	-0.05625	-0.075	0.08125	0.1375	0.33125	0.65	0.65	0.76875	0.59375	0.6625	0.4	0.2875	0.10625	0.1875	-0.21875	-0.3	-0.1375	0.025	0.0375	0.125	0.20625	0.1625	0.04375	0.04375	0.43125	0.34375	0.3875	0.4875	0.55625	0.4	0.6375	0.69375	0.70625	0.825	0.66875	0.6375	0.8125	0.55625	0.59375	-0.5
-0.21875	0	-0.025	0.33125	0.3875	0.2375	0.29375	0.45625	0.0875	0.06875	0.09375	-0.075	-0.01875	-0.0125	-0.06875	0.15	0.15	-0.03125	0.04375	0.0125	-0.1	0.1875	0.10625	0.1375	0.18125	0.25	0.1125	0.325	0.1875	0.175	0.25625	0.2625	0.14375	0.14375	0.38125	0.09375	0.2375	0.2875	0.40625	0.25	0.4875	0.39375	0.50625	0.525	0.41875	0.3875	0.4625	0.15625	0.260417	-0.5
-0.21875	0.25	0.475	0.83125	0.7875	0.6375	0.54375	0.35625	-0.1125	-0.23125	-0.05625	-0.175	-0.06875	-0.0125	-0.06875	-0.2	-0.35	-0.43125	-0.40625	-0.2375	-0.2	-0.1125	-0.04375	-0.0125	0.08125	-0.1	0.0625	-0.025	0.1875	-0.125	0.15625	0.0125	0.14375	-0.05625	0.13125	-0.30625	-0.0625	-0.1125	-0.04375	0.1	0.4375	0.34375	0.35625	0.275	0.26875	0.3875	0.4125	0.20625	0.260417	-0.5
-0.21875	-0.25	-0.375	-0.46875	-0.6625	-0.7625	-0.75625	-0.29375	-0.0625	0.36875	0.74375	0.825	0.63125	0.5875	0.43125	0.4	0.45	0.36875	0.64375	0.7625	0.75	0.5875	0.50625	0.4375	0.53125	0.45	0.6625	0.725	0.5375	0.275	0.35625	0.2625	0.24375	0.34375	0.23125	0.14375	0.2875	0.4375	0.35625	0.65	0.4875	0.29375	0.15625	-0.025	-0.03125	0.0375	0.1125	0.15625	0.177083	0.5
-0.21875	-0.25	-0.275	-0.31875	-0.0125	-0.0625	-0.00625	0.35625	0.4875	0.11875	0.29375	0.225	0.28125	0.0375	0.38125	0.25	0.45	-0.03125	0.04375	-0.1375	0.1	0.0875	0.05625	0.0875	0.03125	-0.1	-0.2375	0.075	0.2375	0.225	0.30625	0.3125	0.49375	0.29375	0.38125	0.14375	0.2875	0.0375	0.20625	0.25	0.3875	0.39375	0.50625	0.475	0.41875	0.4375	0.5625	0.35625	0.510417	0
0.03125	0.0833333	0.175	0.18125	0.4375	0.3375	0.14375	0.30625	0.3375	-0.03125	0.04375	0.275	-0.01875	0.0375	0.08125	0.25	-0.2	-0.08125	-0.10625	-0.0375	-0.15	0.2875	0.20625	0.0875	0.13125	-0.1	-0.1875	0.025	0.3875	0.525	0.70625	0.7125	0.69375	0.29375	0.28125	0.14375	-0.1125	-0.1125	0.15625	0.05	0.2875	0.74375	0.65625	0.575	0.46875	0.5875	0.4125	0.40625	0.59375	0
0.28125	0.666667	0.925	1.13125	1.0875	0.8875	0.69375	0.45625	0.2875	-0.03125	0.09375	-0.075	-0.16875	-0.2125	-0.06875	-0.05	-0.1	0.11875	0.14375	0.0625	0.05	0.2875	0.30625	0.1375	0.18125	-2.77556e-17	-0.1375	-0.125	-0.2125	-0.225	-0.14375	-0.2375	-0.25625	-0.15625	-0.01875	-0.15625	-0.1625	-0.1625	-0.19375	-0.2	-0.0625	-0.05625	0.00625	-0.075	0.01875	0.1375	0.2125	0.20625	0.427083	0.75
Bin depth (microns)
0	32	64	96	128	160	192	224	256	288	320	352	384	416	448	480	512	544	576	608	640	672	704	736	768	800	832	864	896	928	960	992	1024	1056	1088	1120	1152	1184	1216	1248	1280	1312	1344	1376	1408	1440	1472	1504	1536	1568
[truncated: 1 more columns]

## Sheet: Fig S5F
Temporal Association Cortex (TeA)
Caspase-Control Neun+ Neurons per bin
-0.1125	-0.45625	-0.6375	-0.725	-0.86875	-0.56875	-0.6125	-0.3125	-0.425	-0.3375	-0.25	-0.0375	-0.25	-0.00625	0.0375	0.214583	-0.1	0.04375	0.18125	0.38125	0.01875	0.05625	-0.525	-1.0625	-0.90625	-1.6875	-1.69375	-1.95	-2.03958	-1.58125	-1.5125	-1.3	-1.66875	-1.0375	-1.58125	-1.83125	-1.825	-1.81875	-1.74375	-1.1625	-1.1875	-1.13125	-1.075	-1.04375	-1.25	-1.6	-1.15625	-0.9875	-1.00625	-0.7
-0.1125	-0.0395833	-0.5375	-0.475	-0.36875	-0.06875	-0.1125	0.1875	0.175	0.6625	1.15	0.9625	0.55	0.39375	0.3375	0.214583	5.55112e-17	0.09375	-0.26875	-0.76875	-1.13125	-0.64375	-0.675	-0.70625	-0.05625	0.4625	0.55625	0.25	0.210417	0.01875	0.0375	0.15	0.18125	0.2125	-0.03125	0.06875	-0.075	-0.21875	-0.19375	0.0375	0.1125	0.11875	0.125	0.15625	0.3	0.2	0.34375	0.3625	0.24375	0.25
-0.1125	-0.372917	-0.4375	-0.575	-0.81875	-0.51875	-1.0625	-0.7625	-1.375	-1.7875	-2.2	-1.4875	-1.9	-1.45625	-1.3125	-0.96875	-0.5	-0.00625	-0.06875	-0.11875	0.16875	0.05625	0.275	0.49375	0.94375	1.0625	1.00625	0.95	0.89375	0.76875	0.5875	0.5	0.43125	0.3625	-0.03125	-0.23125	-0.625	-1.01875	-0.84375	-0.8625	-0.6875	-0.98125	-1.275	-0.79375	-0.85	-0.85	-0.75625	-0.1875	-0.20625	0.15
0.6375	0.29375	1.0625	1.025	1.33125	1.63125	1.5875	1.8875	1.325	0.7625	0.42	1.0625	0.8	0.89375	0.7375	0.747917	0.45	0.44375	-0.01875	-0.71875	-1.33125	-1.84375	-1.925	-1.00625	-1.55625	-1.4875	-0.99375	-0.3	0.260417	-0.28125	-0.3125	5.55112e-17	0.23125	0.4625	0.06875	0.11875	0.225	0.33125	0.65625	0.4375	0.6125	0.81875	1.025	1.10625	0.75	0.85	0.99375	0.8125	0.39375	0.25
0.1375	-0.122917	0.8625	0.875	0.83125	1.13125	0.6375	0.9375	0.075	-0.2875	-0.1165	0.0125	-0.15	0.04375	0.3875	0.63125	-0.1	-0.15625	-0.66875	-1.01875	-1.13125	-0.69375	-0.775	-0.5625	-0.15625	-0.1875	-0.24375	-0.35	-0.422917	-0.48125	-0.6125	-0.6	-0.66875	-0.7375	-0.53125	-0.53125	-0.775	-1.01875	-0.49375	-0.5125	-0.5375	-0.48125	-0.425	-0.29375	-0.4	-0.2	0.04375	0.1625	0.24375	0.15
0.1375	0.710417	0.8125	0.575	0.13125	0.43125	-0.6625	-0.3625	-0.825	-1.0375	-1.25	-0.7375	-0.6	-0.05625	0.5375	1.09792	0.9	0.99375	0.98125	0.88125	0.81875	0.60625	0.725	0.4375	0.34375	-0.0375	-0.09375	-0.4	-0.539583	-0.88125	-0.7125	-0.65	-0.66875	-0.6875	-0.68125	-0.53125	-0.625	-0.71055	-0.54375	-0.6125	-0.1875	-0.33125	-0.475	-0.39375	0.1	0.3	0.24375	0.6625	0.64375	0.4
0.1375	-0.289583	-0.3875	-0.325	-0.31875	-0.01875	-0.1625	0.1375	0.475	0.1625	0.15	0.4625	-0.1	-0.05625	-0.6625	-0.835417	-1.6	-1.60625	-1.66875	-1.91875	-1.38125	-0.94375	-0.725	-0.5625	-0.60625	-0.2375	-0.24375	-0.1	-0.05625	-0.23125	-0.0125	-0.45	-0.71875	-0.9875	-0.83125	-0.83125	-1.025	-1.1875	-0.44375	-0.3125	-0.0875	0.06875	0.225	0.15625	-0.2	0.1	-0.05625	0.1625	-0.10625	0.25
tdTomato Neurons per bin
0	0	0	0	0	0	0	0	0	0.3	0.5	0.8	0.8	0.8	0.5	0.3	0.5	0.5	0.5	0.5	0.5	0.3	0.3	0.3	0.3	0.3	0.3	0	0.3	0.3	0.3	0.3	0.3	0	0	0.3	0.3	0.3	0.5	0.8	0.5	0.8	1.1	0.8	0.5	0.5	0.3	0	0	0.5
0	0.1	0.2	0.2	0.2	0.2	0.1	0.1	0.8	0.8	0.6	0.6	0.6	0.8	0.6	0.6	0.2	0.2	0.6	0.8	1.2	1.2	1.2	0.6	0.2	0	0.8	0.6	0.8	1.2	1.2	0.8	0.8	0.6	0.2	0	0.6	0.6	0.6	0.6	0.6	0	0	0.2	0.6	0.8	0.8	0.2	0	0.6
0	0	0	0	0	0	0	0	0.6	0	0	0	0	0	0	0	0	0	0	0	0	0.2	0.2	0.2	0.3	0.3	0.2	0.2	0.6	0.6	0.2	0.2	0.2	0	0	0	0	0	0	0	0.2	0.6	0.8	1.4	1.4	1.2	0.8	0	0	0.6
0	0	0.2	0.2	0.2	0.2	0	0	0.2	0.2	0.6	0.6	0.6	0.6	0.6	0.2	0.2	0.6	0.6	0.6	0.6	0.8	0.6	0.2	0.2	0.2	0.6	0.2	1.2	2	2	2	2.2	1.4	0.6	0.2	0.2	0	0	0	0	0.2	0.2	0.2	0.2	0.2	0	0.2	0	0.6
0	0	0.3	0.3	0.3	0.3	0.1	0.1	0.5	0.1	0.3	0.1	0.1	0.1	0.3	0.1	0	0.3	0.3	0.3	0.3	0.8	0.5	0.3	0.3	0.3	0	0.3	0.5	0.8	0.8	0.8	0.5	0.3	0.5	0.5	0.5	0.5	0.5	0.3	0.3	0.3	0	0	0	0	0	0	0	0.5
0	0	0.4	0.4	0.4	0.4	0	0	0.6	0	0.2	0	0	0	0.2	0	0.2	0.2	0.2	0.2	0.2	1	0.6	0.2	0.2	0.4	0.8	0.8	0.5	0.5	0.5	0.8	0.5	0.5	0.3	0.3	0.5	0.8	1.1	1.1	1.1	0.5	1.4	1.4	0.8	0.3	0.5	0.3	0.3	0.8
0	0	0.4	0.4	0.4	0.4	0	0	0.6	0	0.2	0.2	0.2	0.2	0.2	0	0.2	0.2	0.2	0.2	0	1	0.6	0.2	0.3	0.3	0.5	0	0	0	0	0	0	0	0	0	0	0	0	0.3	0.3	0.3	0.3	0	0	0.3	0.3	0.5	0.5	1.1
0	0	0.4	0.4	0.4	0.4	0	0	0.8	0.2	0.2	0.2	0.2	0.4	0.2	0	0.4	0.2	0.2	0	0	1	0.6	0.2	0.2	0.4	0.3	0.3	0.5	0.5	0.5	0.5	0.5	0.3	0.3	0.5	0.5	0.5	0.5	0.8	0.5	0.3	0.3	0.3	0.3	0.3	0	0	0	0.5
Bin depth (microns)
0	32	64	96	128	160	192	224	256	288	320	352	384	416	448	480	512	544	576	608	640	672	704	736	768	800	832	864	896	928	960	992	1024	1056	1088	1120	1152	1184	1216	1248	1280	1312	1344	1376	1408	1440	1472	1504	1536	1568
[truncated: 1 more columns]

## Sheet: Fig S5G
Retrosplenial cortex (Rs)
Caspase-Control Neun+ Neurons per bin
-0.15	-0.025	-0.11875	-0.275	-0.66875	-0.86875	-1.04375	-0.85	-0.39375	0.15625	0.41875	0.61875	0.6375	0.49375	0.45	0.34375	0.55	0.475	0.4125	0.13125	0.16875	-0.15	0.075	-0.075	0.19375	0.2875	0.2625	-0.15	-0.325	-0.475	-0.6	-0.8	-0.51875	-0.2125	-0.225	-0.175	0.14375	0.1875	0.18125	0.1625	0.275	0.33125	0.3875	0.29375	-0.01875	-0.2375	-0.625	-0.99375	-0.910417	-0.93125
0.1	-0.025	-0.01875	-0.175	-0.36875	-0.26875	-0.39375	0	0.35625	0.50625	0.56875	0.86875	0.8375	0.84375	1.05	0.94375	1	0.725	0.3625	0.08125	0.21875	-0.05	-0.025	0.125	0.39375	0.2875	0.2125	0.45	0.625	0.725	0.7	0.7	0.58125	0.5375	0.625	0.975	0.94375	1.0875	1.08125	1.0625	0.825	0.98125	1.0875	0.89375	0.53125	0.2125	-0.025	-0.34375	-0.327083	0.06875
-0.15	-0.108333	-0.21875	-0.075	-0.11875	0.08125	0.20625	0.55	0.65625	0.75625	0.46875	0.61875	0.5875	0.44375	0.3	0.89375	0.9	0.875	0.7625	0.98125	0.66875	0.75	0.625	0.975	1.19375	1.3375	0.8625	1	0.575	0.225	0.25	0.4	0.53125	0.6375	0.825	0.525	0.64375	0.3875	0.58125	0.5625	0.725	0.73125	0.5875	0.64375	0.53125	0.5625	0.375	0.50625	0.25625	0.31875
0.35	0.141667	-0.01875	0.125	-0.06875	0.03125	0.10625	0.2	0.30625	0.55625	0.51875	0.51875	0.9875	0.74375	0.7	0.84375	0.95	0.525	0.3125	0.43125	0.31875	0.2	0.025	0.225	0.29375	0.2875	0.1125	0.15	0.125	-0.075	-0.1	-0.05	0.08125	0.1375	0.325	0.175	0.34375	0.2875	0.43125	0.2625	0.575	0.48125	0.5875	0.59375	0.98125	0.8625	1.325	1.35625	1.17292	0.56875
-0.15	-0.108333	-0.31875	-0.475	-0.86875	-1.06875	-1.14375	-1.1	-0.84375	-0.39375	-0.18125	0.16875	0.5875	0.54375	0.45	0.29375	0.35	-0.075	-0.1375	-0.16875	-0.03125	-0.4	-0.325	-0.175	0.09375	0.1875	0.3125	0.3	0.125	-0.225	-0.2	-0.35	-0.16875	-0.1625	-0.025	-0.075	-0.00625	-0.3625	0.03125	0.0625	-0.075	0.18125	0.5375	0.34375	0.43125	0.4125	-0.025	-0.24375	-0.827083	-0.43125
-0.15	0.225	0.28125	0.225	0.23125	0.43125	0.30625	0.4	0.50625	0.25625	-0.03125	0.26875	0.2375	0.14375	0.3	0.54375	0.2	0.075	0.0125	-0.11875	-0.38125	-0.1	-0.125	0.075	0.34375	0.3375	0.1125	0.35	0.175	-0.075	0.25	0.15	0.03125	0.3875	0.575	0.225	0.54375	0.5375	0.33125	0.2125	0.525	0.18125	0.1875	0.04375	-0.21875	-0.6375	-0.825	-1.04375	-1.16042	-0.68125
-0.15	-0.025	-0.06875	-0.125	-0.16875	-0.21875	-0.24375	-0.1	0.15625	-0.09375	0.01875	-0.18125	-0.0125	-0.15625	0.05	0.19375	0.2	-0.175	-0.1875	-0.56875	-0.78125	-0.45	-0.375	-0.425	0.14375	0.2375	0.0625	0.25	0.275	0.075	0.15	0.1	-0.11875	-0.0125	0.075	0.025	-0.00625	0.2375	-0.01875	-0.0875	0.125	0.33125	0.4875	0.74375	0.58125	0.1625	-0.275	-0.59375	-0.910417	-0.18125
tdTomato Neurons per bin
0.6	0.8	0.6	0.6	0.8	0.6	0.4	0.4	0.8	0.6	0.4	0.4	0.2	0	0.2	0.2	0	0.2	0.2	0.2	0.2	0.2	0	0.4	0.6	0.6	0.6	0.4	0.2	0.4	0.4	0.4	0.4	0.4	0.2	0.2	0.2	0.2	0.2	0	0	0	0	0	0	0	0	0.4	0.4	0.6
0.2	0	0.4	0.4	0.4	0.4	0.4	0	0	0.2	0.4	0.6	0.6	0.6	0.6	0.6	0.4	0.6	0.8	0.8	0.6	0.6	0.4	0.4	0.4	0.4	0.6	0.4	0.4	0.2	0.2	0.4	0.6	0.8	0.8	0.8	0.4	0.2	0	0	0	0.2	0.2	0.2	0.2	0.2	0	0.4	0.4	0.4
0.2	0	0.2	0.4	0.6	0.6	0.6	0.4	0.2	0.2	0.2	0.6	0.6	0.8	0.6	0.4	0.4	0.4	0.2	0.4	0.4	0.4	0.2	0.6	0.2	0.2	0	0	0	0	0	0	0	0	0	0	0	0	0	0.2	0.2	0.2	0.2	0.4	0.2	0.2	0.2	0.4	0.4	0.4
0	0	0	0	0	0	0.2	0.4	0.6	1	1	0.8	0.6	0.4	0	0.2	0.2	0.4	0.4	0.2	0.2	0.2	0	0	0	0	0	0	0	0	0	0	0	0	0.2	0.2	0.2	0.2	0.2	0	0	0	0	0	0	0	0	0.4	0.4	0.6
0.4	0.2	0.2	0	0	0	0	0.2	0.2	0.2	0.2	0.2	0	0.2	0.2	0.4	0.2	0.8	1.4	1.4	1.4	1.6	1	0.4	0.4	0.4	0.4	0.4	0.2	0.2	0.4	0.4	0.4	0.4	0.6	0.4	0.2	0.2	0.2	0	0	0.2	0.2	0.2	0.2	0.2	0	0.4	0.4	0.4
0.2	0.2	0.4	0.6	0.6	0.8	0.6	0.8	0.8	0.8	0.6	0.8	0.4	0.4	0.6	0.4	0.2	0.8	1.4	1.4	1	1.2	1	1.2	1.2	1.2	1	0.8	0.6	0.2	0.2	0.6	0.6	0.4	0.6	0.6	0.2	0.2	0.2	0	0.6	0.8	0.8	0.8	1	0.4	0.2	0.4	0	-0.2
0.2	0	0.2	0.2	0.2	0.4	0.4	0.6	0.6	0.6	0.6	0.6	0.4	0.4	0.4	0.4	0.2	0.8	1.6	1.4	1.2	1.4	1	0.8	0.8	0.8	0.6	0.6	0.4	0	0.2	0.4	0.4	0.2	0.6	0.4	0.2	0.2	0.2	0	0.4	0.6	0.6	0.6	0.8	0.4	0.2	0.4	0	0
0	-0.2	0	0.2	0	0.2	0.2	0.8	0.6	0.8	0.6	0.6	0.2	0.4	0.4	0.4	0.2	1	1.8	1.8	1.4	1.8	1.2	1	0.8	0.8	0.6	0.6	0.4	0	0.2	0.4	0.4	0.2	0.6	0.4	0.2	0.2	0.2	0	0.4	0.8	0.8	0.8	0.8	0.4	0.2	0.4	0	0.2
Bin depth (microns)
0	32	64	96	128	160	192	224	256	288	320	352	384	416	448	480	512	544	576	608	640	672	704	736	768	800	832	864	896	928	960	992	1024	1056	1088	1120	1152	1184	1216	1248	1280	1312	1344	1376	1408	1440	1472	1504	1536	1568
[truncated: 1 more columns]
