# Supplementary material for: Maturation of cortical input to dorsal raphe nucleus increases behavioral persistence in mice
Source: eLife. 2024 Mar 13;13:e93485. doi: 10.7554/eLife.93485 (PMC10994666; doi:10.7554/eLife.93485)
Supplement: Figure 3—source data 1. [file elife-93485-fig3-data1.xlsx]

## Sheet: Fig 3B
Prelimbic/Infralimbid Cortex (PL/IL)
Caspase-Control Neun+ Neurons per bin
0.625	0.8125	1.0625	1.4875	2.025	2.5375	3.4875	3.6625	2.775	2.85	2.35	1.95	2.175	2.875	2.5375	2.125	1.85	1.4125	1.0375	1.05	1.3875	1.4	1.2375	0.85	-0.0875	-0.7625	-1.85	-1.875	-1.2	-0.1125	0.2625	0.9875	1.25	0.75	0.1375	0.5	0.4875	0.075	1.4	2.1	3.05	4.0125	4.4	4.475	3.7625	2.7125	2.1125	1.9875	1.5625	1.75
-0.375	-0.1875	-0.6375	-0.6125	-0.675	-0.5625	0.8875	1.0625	1.375	1.05	0.65	0.25	-0.325	-0.625	-0.0625	0.225	-0.85	-0.5875	-0.5625	-0.75	-1.2125	-0.2	-0.0625	-1.45	-1.4875	-2.1625	-3.05	-3.675	-2.7	-2.2125	-1.4375	-1.7125	-1.65	-1.95	-2.7625	-2.8	-1.7125	-0.025	1	1.5	2.75	1.2125	-0.2	-0.425	-0.9375	-2.2875	-0.9875	-1.1125	-1.27083	-2.75
0.125	-0.0208333	-0.1375	-0.4125	-0.175	-0.5625	-0.1125	-0.2375	0.475	1.15	1.85	1.75	1.575	1.075	0.7375	-0.175	-0.55	-0.6875	-1.2625	-1.65	-1.3125	-1.4	-0.9625	-0.95	-1.5875	-1.1625	-1.05	-1.075	-0.3	-0.0125	-1.1375	-0.9125	-1.25	-1.95	-2.5625	-1.9	-2.4125	-2.625	-1.7	-0.1	0.25	0.2125	0.3	-1.125	-2.9375	-4.4875	-5.0875	-5.9125	-6.27083	-5.75
-0.375	-0.0208333	0.0625	-0.1125	-0.375	-0.9625	-1.3125	-1.7375	-1.825	-1.75	-0.85	0.05	0.575	0.875	1.2375	0.325	-0.95	-0.6875	-1.7625	-1.45	-2.2125	-1.6	-2.8625	-2.45	-4.4875	-3.6625	-4.15	-3.575	-3.7	-2.8125	-3.3375	-3.5125	-3.95	-3.75	-3.7625	-2.6	-3.0125	-2.425	-2.3	-1.3	-1.65	-1.9875	-2.9	-3.725	-4.9375	-5.7875	-5.1875	-5.4125	-5.27083	-6.25
0.125	-0.1875	-0.5375	-1.0125	-1.375	-1.5625	-2.1125	-3.1375	-3.225	-3.15	-2.05	-1.25	0.475	1.475	1.7375	1.325	1.15	0.4125	-0.5625	-0.35	-1.8125	-1.8	-1.9625	-1.45	-2.6875	-2.3625	-2.25	-3.175	-3.3	-2.5125	-2.3375	-2.9125	-1.85	-2.15	-2.5625	-1.9	-1.8125	-1.925	-1	-0.2	0.55	0.9125	0.7	-0.725	-1.6375	-3.3875	-4.5875	-5.6125	-6.4375	-7.25
-0.375	-0.354167	0.1625	-0.1125	0.025	0.2375	0.7875	1.5625	2.475	3.45	2.45	2.95	1.675	1.075	0.3375	0.625	-0.75	-0.0875	-0.7625	-0.95	-0.9125	-0.9	-1.9625	-1.55	-1.8875	-2.8625	-3.05	-2.375	-2.7	-3.3125	-1.5375	-2.5125	-2.15	-2.05	-1.9625	-3.3	-2.5125	-3.725	-3.4	-1.1	-0.15	0.1125	1	0.275	-2.2375	-2.7875	-3.7875	-4.6125	-4.4375	-3.25
-0.375	-0.520833	-0.6375	-0.7125	-0.475	-0.6625	-0.4125	-0.4375	-1.325	-1.45	-0.95	-0.85	-1.225	-0.525	-0.7625	-1.175	-1.05	-0.5875	-0.6625	0.05	-0.2125	0.2	-0.0625	0.35	-0.9875	-1.1625	-1.15	-1.475	-1.8	-1.6125	-2.2375	-3.2125	-3.55	-5.25	-7.0625	-7.1	-7.8125	-7.425	-5.2	-2.5	-1.95	-0.5875	-0.2	-0.325	-0.1375	0.1125	-0.4875	-0.9125	-2.27083	-2.75
tdTomato Neurons per bin
0.4	0.2	0.2	0.1	0.1	0.1	0.1	0.1	0.1	0	0	0	0	0	0	0	0	0	0	0	0	0.1	0.2	0.2	0.2	0.2	0.2	0.2	0.4	0.8	1.3	1.6	1.9	2.7	3.4	3.7	3.9	4.1	3.9	3.2	2.6	2.7	2.5	1.8	1.6	1.8	1.5	1.3	1.6	1
0.2	0.2	0.2	0.2	0.2	0	0	0.1	0.2	0.2	0.3	0.4	0.3	0.2	0.2	0.1	0	0	0	0.1	0.1	0.2	0.2	0.3	0.3	0.3	0.4	0.6	1	1	1.2	1.8	2.3	2.7	3.5	4.4	4	4.2	3.8	3.8	3.1	3	2.5	2.3	1.8	1.9	2	1.9	2	1.5
0.3	0.3	0.4	0.4	0.4	0.1	0.1	0	0	0	0	0	0	0.1	0.1	0.1	0.1	0.1	0	0	0	0	0.1	0.2	0.2	0.3	0.8	1.1	2.1	2.9	3.5	4.3	4.8	4.8	4.5	4.7	4.3	4.1	3.5	3.5	2.9	2	1.8	1.4	1	0.9	1.1	0.8	1	1
0.3	0.1	0.1	0.1	0.1	0.1	0.1	0.1	0.1	0	0	0	0	0	0.3	0.6	0.6	0.6	0.6	0.3	0.2	0.2	0.4	0.4	0.7	0.9	1.5	1.7	2.8	3.4	3.6	4	4.6	4.5	4.5	5.2	5.1	4.6	4.3	3.9	3	2.5	2.1	1.6	1.3	1	0.6	0.7	0.5	1
0.5	0.4	0.3	0.3	0.1	0.1	0.1	0.2	0.2	0.3	0.2	0.2	0.2	0.3	0.2	0.2	0.2	0.1	0	0	0	0.3	0.3	0.4	0.4	0.4	0.3	0.3	0.4	0.6	1.4	1.4	1.7	2.2	3.1	3	3.6	4.1	4.5	4.1	4.2	4.4	3.8	3.5	3.1	2.7	1.9	1.9	1.3	1
0	0	0.1	0.1	0.1	0.2	0.2	0.2	0.3	0.3	0.2	0.2	0.1	0	0	0	0	0.1	0.2	0.4	0.4	0.5	0.5	0.4	0.3	0.3	0.2	0.4	0.7	1.4	1.7	2	2.4	2.6	2.8	3.4	3.8	3.6	3.2	2.5	2	1.5	1.6	1.8	1.9	1.7	1.8	1.5	1.3	1.5
0	0	0	0	0	0.1	0.1	0.1	0.1	0.1	0	0	0	0	0	0	0	0.1	0.1	0.1	0.1	0.4	0.8	1	1.3	2.2	2.6	3.4	4.4	4.9	5.2	5.2	4.9	4.3	4.3	3.8	3.3	2.8	2.6	2.1	1.6	1.8	1.5	1.4	1.4	1.3	1	1	0.6	1
0.3	0.4	0.4	0.4	0.2	0.2	0.1	0.1	0.1	0.1	0.2	0.1	0.3	0.6	0.6	0.5	0.5	0.3	0.2	0.4	0.5	0.7	1	1.1	1.2	1.6	2.2	2.3	2.6	2.6	2.8	2.2	2.8	3.1	3.8	4	4.9	4.7	4.5	4.4	3.6	2.7	2.2	2	1.5	1.4	1.3	1.3	0.6	1.5
Bin depth (microns)
0	16	32	48	64	80	96	112	128	144	160	176	192	208	224	240	256	272	288	304	320	336	352	368	384	400	416	432	448	464	480	496	512	528	544	560	576	592	608	624	640	656	672	688	704	720	736	752	768	784
[truncated: 1 more columns]

## Sheet: Fig 3C
Layer V Caspase-Control Neun+ neurons
MO	PR/IL	Cg	Rs	TeA	M1
-0.3869	-1.811	-3.09225	0.8071	-0.7643	0.2345
-2.81545	-2.49705	-0.1637	0.769	1.7595	0.7333
-1.81545	-1.44945	-3.5923	-1.8024	-1.0024	0.1429
-0.4583	-1.75895	-1.37795	1.8167	0.3595	0.219
1.06545	-4.1161	-1.0476	0.5976	-0.6976	-0.6702
-1.3631	-2.30655	-2.2619	0.7595	0.331	-1.8512
0.02235	-2.9732	-2.28275	-0.2595	-0.631	-0.556

## Sheet: Fig 3E
Virus	MouseID	Rewards_over_time		Virus	MouseID	Num_pokes		Virus	MouseID	AfterLast
tdTomato	CD02	0.0119932		tdTomato	CD02	3.70588		tdTomato	CD02	2.88235
tdTomato	CD04	0.0191948		tdTomato	CD04	2.66667		tdTomato	CD04	1.73077
tdTomato	CD17	0.0352452		tdTomato	CD17	5.32456		tdTomato	CD17	4.37719
tdTomato	CD18	0.0369892		tdTomato	CD18	4.97297		tdTomato	CD18	3.94595
tdTomato	CD19	0.0324396		tdTomato	CD19	4.93846		tdTomato	CD19	4
tdTomato	CD20	0.0140188		tdTomato	CD20	3.91667		tdTomato	CD20	2.96667
tdTomato	CD21	0.0457447		tdTomato	CD21	4.06452		tdTomato	CD21	3.06452
tdTomato	CD22	0.0360879		tdTomato	CD22	2.84058		tdTomato	CD22	1.85507
Caspase	CD06	0.0349937		Caspase	CD06	2.38732		Caspase	CD06	1.43662
Caspase	CD10	0.0298456		Caspase	CD10	3.58197		Caspase	CD10	2.68033
Caspase	CD11	0.0197514		Caspase	CD11	2.80952		Caspase	CD11	1.87302
Caspase	CD13	0.0243158		Caspase	CD13	3.35644		Caspase	CD13	2.31683
Caspase	CD14	0.0380039		Caspase	CD14	3.09615		Caspase	CD14	2.03846
Caspase	CD15	0.048735		Caspase	CD15	2.29796		Caspase	CD15	1.38367
Caspase	CD16	0.0436985		Caspase	CD16	2.33333		Caspase	CD16	1.3642

## Sheet: Fig 3F
Virus	PokeTime	Median	CI
tdTomato	-0.970616	0	(0.0, 0.0)
tdTomato	-0.920616	0	(0.0, 0.0)
tdTomato	-0.870616	0	(0.0, 0.0)
tdTomato	-0.820616	0	(0.0, 0.0)
tdTomato	-0.770616	0	(0.0, 0.0)
tdTomato	-0.720616	0	(0.0, 0.013513513513513514)
tdTomato	-0.670616	0.00641026	(0.00641025641025641, 0.008082497212931996)
tdTomato	-0.620616	0.00641026	(0.00641025641025641, 0.008082497212931996)
tdTomato	-0.570616	0.0144491	(0.01444906444906445, 0.014536442797312362)
tdTomato	-0.520616	0.0144491	(0.01444906444906445, 0.014536442797312362)
tdTomato	-0.470616	0.0144491	(0.01444906444906445, 0.014536442797312362)
tdTomato	-0.420616	0.0144491	(0.01444906444906445, 0.014536442797312362)
tdTomato	-0.370616	0.0144491	(0.01444906444906445, 0.014962700256817903)
tdTomato	-0.320616	0.0144491	(0.01444906444906445, 0.014962700256817903)
tdTomato	-0.270616	0.0144491	(0.01444906444906445, 0.014962700256817903)
tdTomato	-0.220616	0.0144491	(0.01444906444906445, 0.014962700256817903)
tdTomato	-0.170616	0.0144491	(0.01444906444906445, 0.014962700256817903)
tdTomato	-0.120616	0.0144491	(0.01444906444906445, 0.043521950043689174)
tdTomato	-0.0706162	0.0164642	(0.016464237516869096, 0.04150677697588453)
tdTomato	-0.0206162	0.0258772	(0.012363679468942623, 0.032093821510297486)
tdTomato	0.0293838	0.0302632	(0.016749644381223325, 0.03383940620782726)
tdTomato	0.0793838	0.0380589	(0.022674241434852638, 0.026043707283096074)
tdTomato	0.129384	0.0424448	(0.02577815506508206, 0.0344782551913282)
tdTomato	0.179384	0.055358	(0.03869132290184922, 0.06002662581609951)
tdTomato	0.229384	0.0565022	(0.024244089812112256, 0.09734399951791256)
tdTomato	0.279384	0.0700157	(0.008477206303293267, 0.10645492039353932)
tdTomato	0.329384	0.0918654	(0.014942280720681836, 0.08460523059153537)
tdTomato	0.379384	0.107018	(0.01470985155195681, 0.069453044375645)
tdTomato	0.429384	0.134002	(0.037228036106016466, 0.04246835858089057)
tdTomato	0.479384	0.151923	(0.022890818858560813, 0.05395927601809952)
tdTomato	0.529384	0.178623	(0.04959093034128098, 0.027259164535379354)
tdTomato	0.579384	0.201449	(0.052800626713670196, 0.013935340022296544)
tdTomato	0.629384	0.225362	(0.06320015667841755, 0.03617614269788183)
tdTomato	0.679384	0.262788	(0.06923933668839205, 0.04490458390714147)
tdTomato	0.729384	0.27728	(0.07457777470565194, 0.039386189258312)
tdTomato	0.779384	0.308543	(0.05047858074358402, 0.04530305697353759)
tdTomato	0.829384	0.328947	(0.034829721362229116, 0.05566801619433198)
tdTomato	0.879384	0.383484	(0.01681749622926093, 0.035870675813749864)
tdTomato	0.929384	0.41556	(0.023667880404123265, 0.04820834364601384)
tdTomato	0.979384	0.448779	(0.01801019381664537, 0.03367671576500103)
tdTomato	1.02938	0.475806	(0.02965260545905707, 0.04593267882187935)
tdTomato	1.07938	0.517105	(0.05556680161943317, 0.03694879089615932)
tdTomato	1.12938	0.542029	(0.04202898550724643, 0.036918382913806225)
tdTomato	1.17938	0.566392	(0.03698071473007525, 0.04764260828334066)
tdTomato	1.22938	0.581989	(0.052577482605945636, 0.05836162988115445)
tdTomato	1.27938	0.623118	(0.06429475015812769, 0.05636889991728711)
tdTomato	1.32938	0.635811	(0.07698728139904609, 0.05649688149688148)
tdTomato	1.37938	0.665991	(0.06599099099099104, 0.029661182922052443)
tdTomato	1.42938	0.702928	(0.07215869715869716, 0.0406618156618157)
tdTomato	1.47938	0.743478	(0.09831697054698452, 0.028451563691838322)
tdTomato	1.52938	0.759058	(0.11199914748508089, 0.04863433667781503)
tdTomato	1.57938	0.781884	(0.13482523444160266, 0.03862876254180603)
tdTomato	1.62938	0.816667	(0.13924731182795702, 0.023913043478260843)
tdTomato	1.67938	0.846154	(0.14027149321266963, 0.02341137123745818)
tdTomato	1.72938	0.860256	(0.11832092638544256, 0.038294314381270844)
tdTomato	1.77938	0.885343	(0.14340755147206763, 0.013207689294645775)
tdTomato	1.82938	0.887907	(0.11371358952004118, 0.035169785169785195)
tdTomato	1.87938	0.914588	(0.12047001752884112, 0.023873873873873852)
tdTomato	1.92938	0.923228	(0.09969816363678263, 0.03291277547570448)
tdTomato	1.97938	0.92869	(0.07574905221964057, 0.032848232848232795)
tdTomato	2.02938	0.94359	(0.09064856711915537, 0.03076923076923077)
tdTomato	2.07938	0.949896	(0.09695487342546172, 0.024462924462924418)
tdTomato	2.12938	0.964345	(0.11140393787452607, 0.010013860013860065)
tdTomato	2.17938	0.970123	(0.08776968981572564, 0.016363855494290314)
tdTomato	2.22938	0.971795	(0.08944193061840122, 0.019433198380566785)
tdTomato	2.27938	0.979487	(0.06772247360482664, 0.01174089068825901)
tdTomato	2.32938	0.979487	(0.03831070889894428, 0.02051282051282044)
tdTomato	2.37938	0.985897	(0.015309200603318307, 0.014102564102564052)
tdTomato	2.42938	1	(0.01666666666666672, 0.0)
tdTomato	2.47938	1	(0.012820512820512775, 0.0)
tdTomato	2.52938	1	(0.012820512820512775, 0.0)
tdTomato	2.57938	1	(0.0, 0.0)
tdTomato	2.62938	1	(0.0, 0.0)
tdTomato	2.67938	1	(0.0, 0.0)
tdTomato	2.72938	1	(0.0, 0.0)
tdTomato	2.77938	1	(0.0, 0.0)
tdTomato	2.82938	1	(0.0, 0.0)
Caspase	-0.970616	0	(0.0, 0.0)
Caspase	-0.920616	0	(0.0, 0.007042253521126761)
Caspase	-0.870616	0	(0.0, 0.007042253521126761)
Caspase	-0.820616	0	(0.0, 0.007042253521126761)
Caspase	-0.770616	0	(0.0, 0.007042253521126761)
Caspase	-0.720616	0	(0.0, 0.007042253521126761)
Caspase	-0.670616	0.00617284	(0.006172839506172839, 0.009700176366843033)
Caspase	-0.620616	0.00617284	(0.006172839506172839, 0.009700176366843033)
Caspase	-0.570616	0.0123457	(0.012345679012345678, 0.003527336860670194)
Caspase	-0.520616	0.0123457	(0.012345679012345678, 0.024389014865205345)
Caspase	-0.470616	0.0123457	(0.012345679012345678, 0.024389014865205345)
Caspase	-0.420616	0.0123457	(0.012345679012345678, 0.024389014865205345)
Caspase	-0.370616	0.0185185	(0.018518518518518517, 0.022297808012093724)
Caspase	-0.320616	0.0185185	(0.010321797207043107, 0.04270597127739985)
Caspase	-0.270616	0.0211268	(0.011511375947995665, 0.048260994538660534)
Caspase	-0.220616	0.0245902	(0.014689173835416328, 0.04887922382067582)
Caspase	-0.170616	0.0245902	(0.005359394703656997, 0.06928738708598194)
Caspase	-0.120616	0.0352113	(0.015980498374864573, 0.06002682763246143)
Caspase	-0.0706162	0.0492958	(0.02470561071346109, 0.04594232059020791)
Caspase	-0.0206162	0.0492958	(0.02470561071346109, 0.04594232059020791)
Caspase	0.0293838	0.0555556	(0.01709401709401709, 0.03968253968253968)
Caspase	0.0793838	0.0679012	(0.028297274171861626, 0.027336860670194002)
Caspase	0.129384	0.0915493	(0.051945335378608286, 0.006811359963057026)
Caspase	0.179384	0.0952381	(0.04716117216117215, 0.01743796109993294)
Caspase	0.229384	0.126761	(0.05945287107258938, 0.004386977603324876)
Caspase	0.279384	0.142857	(0.019400352733686066, 0.05386416861826698)
Caspase	0.329384	0.15873	(0.02292768959435626, 0.08717148061410357)
Caspase	0.379384	0.192308	(0.02564102564102566, 0.13867822318526543)
Caspase	0.429384	0.240385	(0.049908424908424925, 0.11172806067172261)
Caspase	0.479384	0.314815	(0.10846560846560849, 0.05842462180490349)
Caspase	0.529384	0.373239	(0.1510172143974961, 0.009476612762997716)
Caspase	0.579384	0.387324	(0.1651017214397496, 0.06946617979481828)
Caspase	0.629384	0.408451	(0.15448245025709817, 0.06685793774995652)
Caspase	0.679384	0.434426	(0.11696591204787926, 0.07174660999797616)
Caspase	0.729384	0.459016	(0.0936317780580076, 0.08419348310058689)
Caspase	0.779384	0.47541	(0.07156368221941989, 0.08014571948998184)
Caspase	0.829384	0.508197	(0.07550441361916771, 0.06587735276259865)
Caspase	0.879384	0.540984	(0.0986759142496848, 0.07012750455373407)
Caspase	0.929384	0.57377	(0.12932604735883424, 0.06820481683869661)
Caspase	0.979384	0.606557	(0.14623991673172004, 0.060109289617486295)
Caspase	1.02938	0.639344	(0.10469079694854733, 0.052013762396275975)
Caspase	1.07938	0.663934	(0.07977601038792403, 0.05437543292542146)
Caspase	1.12938	0.680328	(0.07636747281285505, 0.07319325790810438)
Caspase	1.17938	0.696721	(0.06305794513877616, 0.08722930580854082)
Caspase	1.22938	0.729508	(0.07604285018665802, 0.06678809957498477)
Caspase	1.27938	0.754098	(0.061029053725044635, 0.06688929366524998)
Caspase	1.32938	0.795082	(0.09211167018341182, 0.06294272414490998)
Caspase	1.37938	0.838028	(0.10535490168735184, 0.03234220135628585)
Caspase	1.42938	0.860656	(0.07847751988313578, 0.03440599069014372)
Caspase	1.47938	0.866197	(0.05431599497977957, 0.03503738480264307)
Caspase	1.52938	0.885246	(0.04366174322350269, 0.03450718478040882)
Caspase	1.57938	0.901639	(0.026639344262295084, 0.03663226067597647)
Caspase	1.62938	0.918033	(0.014186633039092067, 0.03875733657154423)
Caspase	1.67938	0.92623	(0.015338419087810418, 0.042906294272414436)
Caspase	1.72938	0.934426	(0.013634150300275927, 0.045165607226497095)
Caspase	1.77938	0.950495	(0.00818735719725816, 0.029096787229743404)
Caspase	1.82938	0.960396	(0.008472962680883489, 0.03256170687491289)
Caspase	1.87938	0.980198	(0.012984905047881856, 0.013629140691846953)
Caspase	1.92938	0.990099	(0.018945163747143945, 0.005819357445948636)
Caspase	1.97938	0.990099	(0.018945163747143945, 0.00990099009900991)
Caspase	2.02938	0.991803	(0.0017042687875344908, 0.008196721311475419)
Caspase	2.07938	1	(0.00990099009900991, 0.0)
Caspase	2.12938	1	(0.007042253521126751, 0.0)
Caspase	2.17938	1	(0.0, 0.0)
Caspase	2.22938	1	(0.0, 0.0)
Caspase	2.27938	1	(0.0, 0.0)
Caspase	2.32938	1	(0.0, 0.0)
Caspase	2.37938	1	(0.0, 0.0)
Caspase	2.42938	1	(0.0, 0.0)
Caspase	2.47938	1	(0.0, 0.0)
Caspase	2.52938	1	(0.0, 0.0)
Caspase	2.57938	1	(0.0, 0.0)
Caspase	2.62938	1	(0.0, 0.0)
Caspase	2.67938	1	(0.0, 0.0)
Caspase	2.72938	1	(0.0, 0.0)
Caspase	2.77938	1	(0.0, 0.0)
Caspase	2.82938	1	(0.0, 0.0)
	Caspase	43	0.742882
	Caspase	44	0.357935
	Caspase	45	0.745543
	Caspase	46	0.760799
	Caspase	47	0.241546
	Caspase	48	0.367729
	Caspase	49	1.49516
	Caspase	50	0.250908
	Caspase	51	0.290925
	Caspase	52	1.04599
	Caspase	53	0.801747
	Caspase	54	0.371806
	Caspase	55	0.29048
	Caspase	56	-0.0118872
	Caspase	57	0.149527
	Caspase	58	0.312389
	Caspase	59	0.962132
	Caspase	60	0.951532
	Caspase	61	1.48615
	Caspase	62	0.946501
	Caspase	63	1.22799
	Caspase	64	1.00775
	Caspase	65	0.22917
	Caspase	66	-0.135489
	Caspase	67	-0.101824
	Caspase	68	1.53432
	Caspase	69	0.661529
	Caspase	70	1.00685
	Caspase	71	1.19346
	Caspase	72	1.20634
	Caspase	73	0.455606
	Caspase	74	0.33626
	Caspase	75	0.440594
	Caspase	76	0.111599
	Caspase	77	0.634578
	Caspase	78	0.34811
	Caspase	79	0.395676
	Caspase	80	0.657343
	Caspase	81	1.10065
	Caspase	82	1.02276
	Caspase	83	0.329398
	Caspase	84	0.111934
	Caspase	85	1.21021
	Caspase	86	0.356599
	Caspase	87	0.936665
	Caspase	88	0.67385
	Caspase	89	1.60114
	Caspase	90	-0.10513
	Caspase	91	0.69055
	Caspase	92	0.568436
	Caspase	93	0.333246
	Caspase	94	0.193125
	Caspase	95	1.81836
	Caspase	96	1.2931
	Caspase	97	1.42856
	Caspase	98	0.272538
	Caspase	99	0.654273
	Caspase	100	1.01254
	Caspase	101	1.38775
	Caspase	102	1.61739
	Caspase	103	0.271842
	Caspase	104	0.140194
	Caspase	105	0.382917
	Caspase	106	1.63481
	Caspase	107	0.753889
	Caspase	108	1.79427
	Caspase	109	0.305996
	Caspase	110	-0.675718
	Caspase	111	0.310906
	Caspase	112	0.957559
	Caspase	113	0.28892
	Caspase	114	0.626853
	Caspase	115	1.06326
	Caspase	116	0.23096
	Caspase	117	0.806926
	Caspase	118	1.5232
	Caspase	119	0.371806
	Caspase	120	0.363612
	Caspase	121	0.968996
	Caspase	122	1.36974
	Caspase	123	1.74126
	Caspase	124	-0.419075
	Caspase	125	0.169086
	Caspase	126	1.32834
	Caspase	127	0.291813
	Caspase	128	1.73381
	Caspase	129	0.58816
	Caspase	130	0.286007
	Caspase	131	1.21259
	Caspase	132	1.4143
	Caspase	133	1.06221
	Caspase	134	0.276002
	Caspase	135	-0.126679
	Caspase	136	1.59683
	Caspase	137	-0.946922
	Caspase	138	0.956265
	Caspase	139	0.34183
	Caspase	140	0.106871
	Caspase	141	1.31178
	Caspase	142	2.15352
	Caspase	1	-0.334419
	Caspase	2	1.1782
	Caspase	3	1.4481
	Caspase	4	0.741309
	Caspase	5	0.00603795
	Caspase	6	1.25804
	Caspase	7	0.378398
	Caspase	8	0.58625
	Caspase	9	0.101059
	Caspase	10	0.272306
	Caspase	11	0.720986
	Caspase	12	1.02485
	Caspase	13	0.966048
	Caspase	14	1.19396
	Caspase	15	0.237041
	Caspase	16	1.40264
	Caspase	17	1.84972
	Caspase	18	1.88714
	Caspase	19	0.325926
	Caspase	20	1.34866
	Caspase	21	0.600319
	Caspase	22	1.33538
	Caspase	23	0.563244
	Caspase	24	0.991625
	Caspase	25	1.3626
	Caspase	26	1.55467
	Caspase	27	0.239299
	Caspase	28	1.28921
	Caspase	29	0.290257
	Caspase	30	1.64271
	Caspase	31	0.196453
	Caspase	32	1.01574
	Caspase	33	0.09691
	Caspase	34	1.2349
	Caspase	35	0.417472
	Caspase	36	1.92608
	Caspase	37	1.3236
	Caspase	38	0.573104
	Caspase	39	0.0519239
	Caspase	40	0.919601
	Caspase	41	1.43921
	Caspase	42	0.465977
	Caspase	43	0.344785
	Caspase	44	0.763503
	Caspase	45	0.928037
	Caspase	46	1.81391
	Caspase	47	0.684037
	Caspase	48	2.03509
	Caspase	49	0.346157
	Caspase	50	1.37049
	Caspase	51	0.859318
	Caspase	52	1.12463
	Caspase	53	1.44245
	Caspase	54	0.206826
	Caspase	55	0.218273
	Caspase	56	0.825621
	Caspase	57	1.07151
	Caspase	58	1.21885
	Caspase	59	0.518777
	Caspase	60	0.361539
	Caspase	61	0.999174
	Caspase	62	1.07657
	Caspase	63	0.246499
	Caspase	64	1.0786
	Caspase	65	0.382737
	Caspase	66	0.863085
	Caspase	67	0.805976
	Caspase	68	1.5896
	Caspase	69	1.24217
	Caspase	70	0.243038
	Caspase	71	0.35141
	Caspase	72	0.385964
	Caspase	73	0.0920185
	Caspase	74	0.324694
	Caspase	75	0.0993353
	Caspase	76	0.711976
	Caspase	77	0.630631
	Caspase	78	1.74187
	Caspase	79	0.275081
	Caspase	80	0.816904
	Caspase	81	0.975202
	Caspase	82	1.71241
	Caspase	83	0.439333
	Caspase	84	0.302331
	Caspase	85	0.101403
	Caspase	86	1.32015
	Caspase	87	1.32919
	Caspase	88	0.507721
	Caspase	89	2.00169
	Caspase	90	1.11949
	Caspase	91	0.61066
	Caspase	92	0.869584
	Caspase	93	0.604766
	Caspase	94	0.946894
	Caspase	95	0.863442
	Caspase	96	0.931
	Caspase	97	0.916138
	Caspase	98	1.56608
	Caspase	99	1.33218
	Caspase	100	0.27738
	Caspase	101	-0.312471
	Caspase	102	1.35209
	Caspase	103	0.398981
	Caspase	104	0.0700379
	Caspase	105	-0.250264
	Caspase	106	0.193681
	Caspase	107	0.311542
	Caspase	108	1.13631
	Caspase	109	0.387212
	Caspase	110	0.338656
	Caspase	111	0.884399
	Caspase	112	0.815843
	Caspase	113	1.8142
	Caspase	114	1.38867
	Caspase	115	1.61196
	Caspase	116	0.0161974
	Caspase	117	0.344392
	Caspase	118	0.288026
	Caspase	119	1.31919
	Caspase	120	0.2398
	Caspase	121	1.17978
	Caspase	122	1.22383
	Caspase	1	-0.400117
	Caspase	2	0.720407
	Caspase	3	1.99717
	Caspase	4	1.06371
	Caspase	5	1.74098
	Caspase	6	0.814314
	Caspase	7	0.187521
	Caspase	8	0.760649
	Caspase	9	2.1092
	Caspase	10	0.607241
	Caspase	11	1.4821
	Caspase	12	1.02991
	Caspase	13	0.418135
	Caspase	14	0.303196
	Caspase	15	-0.712198
	Caspase	16	0.474799
	Caspase	17	1.56908
	Caspase	18	1.60486
	Caspase	19	1.14264
	Caspase	20	1.43624
	Caspase	21	0.709694
	Caspase	22	1.48992
	Caspase	23	0.729084
	Caspase	24	0.243286
	Caspase	25	0.656002
	Caspase	26	1.66427
	Caspase	27	1.8192
	Caspase	28	1.74914
	Caspase	29	2.28931
	Caspase	30	1.32249
	Caspase	31	2.1041
	Caspase	32	1.84555
	Caspase	33	1.33143
	Caspase	34	1.43586
	Caspase	35	1.34943
	Caspase	36	0.932068
	Caspase	37	0.645521
	Caspase	38	0.984122
	Caspase	39	0.671636
	Caspase	40	0.188647
	Caspase	41	0.358506
	Caspase	42	0.602603
	Caspase	43	1.37357
	Caspase	44	1.54499
	Caspase	45	0.736157
	Caspase	46	1.58448
	Caspase	47	0.751125
	Caspase	48	0.721068
	Caspase	49	1.60893
	Caspase	50	0.503382
	Caspase	51	1.81197
	Caspase	52	2.52253
	Caspase	53	-0.380907
	Caspase	54	1.95242
	Caspase	55	1.70302
	Caspase	56	-0.206908
	Caspase	57	0.640481
	Caspase	58	1.99213
	Caspase	59	1.0122
	Caspase	60	-0.551294
	Caspase	61	1.74486
	Caspase	62	-0.522879
	Caspase	63	1.52214
	Caspase	1	1.49613
	Caspase	2	0.727785
	Caspase	3	0.0788192
	Caspase	4	0.428783
	Caspase	5	1.38335
	Caspase	6	0.585686
	Caspase	7	1.86328
	Caspase	8	1.61071
	Caspase	9	1.40056
	Caspase	10	0.770557
	Caspase	11	1.22113
	Caspase	12	1.39475
	Caspase	13	1.01334
	Caspase	14	0.982678
	Caspase	15	1.41764
	Caspase	16	1.59787
	Caspase	17	1.24249
	Caspase	18	1.26505
	Caspase	19	0.403807
	Caspase	20	0.609381
	Caspase	21	1.56417
	Caspase	22	1.78816
	Caspase	23	1.90949
	Caspase	24	0.543571
	Caspase	25	1.77509
	Caspase	26	1.15625
	Caspase	27	1.53056
	Caspase	28	1.02653
	Caspase	29	-0.229885
	Caspase	30	0.744058
	Caspase	31	1.14724
	Caspase	32	1.57777
	Caspase	33	1.77889
	Caspase	34	1.60734
	Caspase	35	1.56992
	Caspase	36	0.753277
	Caspase	37	2.11083
	Caspase	38	1.71623
	Caspase	39	1.49361
	Caspase	40	1.8652
	Caspase	41	0.00902574
	Caspase	42	0.808143
	Caspase	43	0.567614
	Caspase	44	0.380573
	Caspase	45	1.02751
	Caspase	46	1.46758
	Caspase	47	0.57461
	Caspase	48	1.07882
	Caspase	49	0.73759
	Caspase	50	1.11588
	Caspase	51	1.50207
	Caspase	52	1.35799
	Caspase	53	1.06058
	Caspase	54	0.390582
	Caspase	55	0.982452
	Caspase	56	1.09771
	Caspase	57	0.796227
	Caspase	58	0.777499
	Caspase	59	0.675962
	Caspase	60	1.36633
	Caspase	61	0.885305
	Caspase	62	1.39637
	Caspase	63	0.453777
	Caspase	64	0.645815
	Caspase	65	0.758912
	Caspase	66	0.590061
	Caspase	67	1.45529
	Caspase	68	1.4683
	Caspase	69	0.555457
	Caspase	70	0.77041
	Caspase	71	1.07802
	Caspase	72	0.834993
	Caspase	73	1.01106
	Caspase	74	0.646502
	Caspase	75	1.07936
	Caspase	76	0.651666
	Caspase	77	0.623766
	Caspase	78	0.993745
	Caspase	79	1.24257
	Caspase	80	1.36795
	Caspase	81	0.415474
	Caspase	82	0.375664
	Caspase	83	-0.0958256
	Caspase	84	0.357935
	Caspase	85	1.15409
	Caspase	86	1.04379
	Caspase	87	0.260787
	Caspase	88	0.933133
	Caspase	89	0.823996
	Caspase	90	1.02197
	Caspase	91	0.820989
	Caspase	92	1.28001
	Caspase	93	0.931966
	Caspase	94	0.882411
	Caspase	95	0.843046
	Caspase	96	0.392873
	Caspase	97	1.20658
	Caspase	98	0.395326
	Caspase	99	0.37767
	Caspase	100	1.7301
	Caspase	101	1.27168
	Caspase	1	1.65431
	Caspase	2	1.86111
	Caspase	3	1.58667
	Caspase	4	0.265525
	Caspase	5	0.197281
	Caspase	6	-0.110698
	Caspase	7	0.96539
	Caspase	8	1.14715
	Caspase	9	0.140822
	Caspase	10	1.98319
	Caspase	11	2.06206
	Caspase	12	1.03567
	Caspase	13	0.645226
	Caspase	14	1.75122
	Caspase	15	1.27515
	Caspase	16	1.25532
	Caspase	17	1.62565
	Caspase	18	0.999913
	Caspase	19	1.31804
	Caspase	20	1.26269
	Caspase	21	0.614897
	Caspase	22	1.09216
	Caspase	23	1.07969
	Caspase	24	1.75242
	Caspase	25	0.764848
	Caspase	26	0.232742
	Caspase	27	0.802842
	Caspase	28	0.36661
	Caspase	29	1.14774
	Caspase	30	0.871748
	Caspase	31	0.82256
	Caspase	32	0.574031
	Caspase	33	0.931865
	Caspase	34	0.475962
	Caspase	35	1.17626
	Caspase	36	1.23093
	Caspase	37	0.412796
	Caspase	38	-0.481486
	Caspase	39	1.5594
	Caspase	40	1.00877
	Caspase	41	1.45862
	Caspase	42	0.405688
	Caspase	43	0.396896
	Caspase	44	0.271609
	Caspase	45	1.47164
	Caspase	46	0.649821
	Caspase	47	1.43816
	Caspase	48	1.56234
	Caspase	49	0.353339
	Caspase	50	1.0035
	Caspase	51	1.35887
	Caspase	52	1.20919
	Caspase	53	1.46473
	Caspase	54	1.02399
	Caspase	55	0.476976
	Caspase	56	0.00603795
	Caspase	57	0.977312
	Caspase	58	1.68389
	Caspase	59	1.36751
	Caspase	60	1.87739
	Caspase	61	0.797406
	Caspase	62	0.962748
	Caspase	63	0.690639
	Caspase	64	1.1533
	Caspase	65	1.5902
	Caspase	66	0.546543
	Caspase	67	0.7406
	Caspase	68	0.313867
	Caspase	69	0.581495
	Caspase	70	0.419295
	Caspase	71	-0.170696
	Caspase	72	0.432328
	Caspase	73	0.367356
	Caspase	74	1.27967
	Caspase	75	0.777717
	Caspase	76	1.9912
	Caspase	77	0.392521
	Caspase	78	0.43409
	Caspase	79	1.14805
	Caspase	80	1.03366
	Caspase	81	0.237544
	Caspase	82	0.377124
	Caspase	83	1.28632
	Caspase	84	1.21869
	Caspase	85	0.909503
	Caspase	86	1.09447
	Caspase	87	1.06479
	Caspase	88	0.273233
	Caspase	89	1.11062
	Caspase	90	1.18735
	Caspase	91	1.82772
	Caspase	92	1.04817
	Caspase	93	0.640779
	Caspase	94	1.38209
	Caspase	95	0.256237
	Caspase	96	0.443419
	Caspase	97	0.754883
	Caspase	98	1.00475
	Caspase	99	1.48876
	Caspase	100	0.192846
	Caspase	101	1.43829
	Caspase	102	0.321391
	Caspase	103	0.928549
	Caspase	104	0.287354
	Caspase	1	0.549126
	Caspase	2	1.66217
	Caspase	3	0.651569
	Caspase	4	0.414973
	Caspase	5	0.141763
	Caspase	6	0.698883
	Caspase	7	0.104828
	Caspase	8	1.85431
	Caspase	9	0.996424
	Caspase	10	-0.739929
	Caspase	11	-0.0362122
	Caspase	12	1.16122
	Caspase	13	0.363424
	Caspase	14	0.888404
	Caspase	15	1.02333
	Caspase	16	0.647676
	Caspase	17	0.495267
	Caspase	18	0.715251
	Caspase	19	1.00518
	Caspase	20	1.59441
	Caspase	21	1.44111
	Caspase	22	1.28274
	Caspase	23	1.35761
	Caspase	24	0.979321
	Caspase	25	1.1003
	Caspase	26	0.979184
	Caspase	27	1.27836
	Caspase	28	0.309417
	Caspase	29	0.924589
	Caspase	30	0.866583
	Caspase	31	1.42786
	Caspase	32	1.23842
	Caspase	33	1.30012
	Caspase	34	-0.09691
	Caspase	35	0.393751
	Caspase	36	1.80789
	Caspase	37	0.922725
	Caspase	38	0.922622
	Caspase	39	1.54468
	Caspase	40	1.10907
	Caspase	41	1.1173
	Caspase	42	-0.0594835
	Caspase	43	1.01199
	Caspase	44	0.763653
	Caspase	45	1.28076
	Caspase	46	0.634981
	Caspase	47	1.06874
	Caspase	48	0.896471
	Caspase	49	0.994757
	Caspase	50	0.452706
	Caspase	51	1.19612
	Caspase	52	0.628287
	Caspase	53	0.576457
	Caspase	54	1.21582
	Caspase	55	0.695394
	Caspase	56	0.31534
	Caspase	57	0.426349
	Caspase	58	0.332236
	Caspase	59	0.693903
	Caspase	60	0.326541
	Caspase	61	0.908539
	Caspase	62	1.34199
	Caspase	63	0.98073
	Caspase	64	1.19234
	Caspase	65	0.98331
	Caspase	66	0.318272
	Caspase	67	1.08113
	Caspase	68	0.932271
	Caspase	69	0.464788
	Caspase	70	0.640779
	Caspase	71	0.538951
	Caspase	72	0.97488
	Caspase	73	1.1389
	Caspase	74	0.476397
	Caspase	75	0.498586
	Caspase	76	0.483872
	Caspase	77	0.788098
	Caspase	78	0.852236
	Caspase	79	0.449324
	Caspase	80	0.304706
	Caspase	81	0.896471
	Caspase	82	0.821841
	Caspase	83	0.439017
	Caspase	84	0.585912
	Caspase	85	0.405858
	Caspase	86	0.173769
	Caspase	87	0.359266
	Caspase	88	-0.358526
	Caspase	89	0.565494
	Caspase	90	0.24403
	Caspase	91	0.689486
	Caspase	92	0.268578
	Caspase	93	0.54133
	Caspase	94	1.18921
	Caspase	95	0.528274
	Caspase	96	0.219323
	Caspase	97	-0.0584886
	Caspase	98	0.676968
	Caspase	99	0.328787
	Caspase	100	0.257439
	Caspase	101	0.499137
	Caspase	102	0.802089
	Caspase	103	0.607991
	Caspase	104	0.190892
	Caspase	105	1.06292
	Caspase	106	0.805025
	Caspase	107	0.388989
	Caspase	108	0.335859
	Caspase	109	1.29544
	Caspase	110	0.108903
	Caspase	111	0.372544
	Caspase	112	0.357363
	Caspase	113	1.18236
	Caspase	114	-0.0584886
	Caspase	115	0.31639
	Caspase	116	0.140822
	Caspase	117	0.857031
	Caspase	118	0.338855
	Caspase	119	-0.262807
	Caspase	120	0.279211
	Caspase	121	1.09202
	Caspase	122	0.25358
	Caspase	123	1.50026
	Caspase	124	0.870813
	Caspase	125	0.301464
	Caspase	126	0.341039
	Caspase	127	0.926394
	Caspase	128	0.416973
	Caspase	129	0.841109
	Caspase	130	0.642761
	Caspase	131	0.445293
	Caspase	132	0.590619
	Caspase	133	0.440752
	Caspase	134	-0.354578
	Caspase	135	1.12097
	Caspase	136	-0.297569
	Caspase	137	1.04112
	Caspase	138	0.440122
	Caspase	139	0.374015
	Caspase	140	-0.365523
	Caspase	141	0.325105
	Caspase	142	0.182415
	Caspase	143	1.7976
	Caspase	144	0.306211
	Caspase	145	0.577722
	Caspase	146	0.238799
	Caspase	147	0.381837
	Caspase	148	0.972851
	Caspase	149	-0.220404
	Caspase	150	0.446692
	Caspase	151	0.361539
	Caspase	152	-0.338187
	Caspase	153	1.2755
	Caspase	154	0.222456
	Caspase	155	0.256477
	Caspase	156	0.590619
	Caspase	157	1.66871
	Caspase	158	0.180986
	Caspase	159	0.496515
	Caspase	160	-0.197911
	Caspase	161	1.00856
	Caspase	162	0.425697
	Caspase	163	0.396722
	Caspase	164	0.327563
	Caspase	165	-0.16877
	Caspase	166	0.275772
	Caspase	167	0.936011
	Caspase	168	0.401401
	Caspase	169	-0.522879
	Caspase	170	-0.158015
	Caspase	171	0.319314
	Caspase	172	0.274389
	Caspase	173	0.639387
	Caspase	174	0.182985
	Caspase	175	1.3014
	Caspase	176	0.188928
	Caspase	177	0.867467
	Caspase	178	0.15412
	Caspase	179	-0.216811
	Caspase	180	0.1827
	Caspase	181	-0.28735
	Caspase	182	0.288026
	Caspase	183	0.288026
	Caspase	184	0.167908
	Caspase	185	0.846832
	Caspase	186	0.140194
	Caspase	187	0.335458
	Caspase	188	0.181844
	Caspase	189	0.597146
	Caspase	190	0.194514
	Caspase	191	0.312177
	Caspase	192	0.159266
	Caspase	193	0.887223
	Caspase	194	0.556905
	Caspase	195	0.283979
	Caspase	196	0.180699
	Caspase	197	0.306854
	Caspase	198	1.02156
	Caspase	199	0.378943
	Caspase	200	0.0951694
	Caspase	201	0.30298
	Caspase	202	0.0496056
	Caspase	203	-0.219683
	Caspase	204	0.16346
	Caspase	205	-0.367543
	Caspase	206	0.247973
	Caspase	207	0.247482
	Caspase	208	0.119256
	Caspase	209	0.333044
	Caspase	210	0.135133
	Caspase	211	0.192289
	Caspase	212	0.821055
	Caspase	213	0.900149
	Caspase	214	0.0530784
	Caspase	215	0.832253
	Caspase	216	0.993039
	Caspase	217	-0.0486625
	Caspase	218	0.0461048
	Caspase	219	1.17984
	Caspase	220	1.24022
	Caspase	221	-0.047692
	Caspase	222	-0.970616
	Caspase	223	0.944976
	Caspase	224	-0.552842
	Caspase	225	1.78011
	Caspase	226	-0.769551
	Caspase	227	1.42954
	Caspase	228	1.64437
	Caspase	229	0.0845763
	Caspase	230	-0.376751
	Caspase	231	-0.173925
	Caspase	232	-0.651695
	Caspase	233	0.457579
	Caspase	234	0.390405
	Caspase	235	1.95154
	Caspase	236	-0.950782
	Caspase	237	1.61486
	Caspase	238	1.08572
	Caspase	239	1.69899
	Caspase	240	0.288696
	Caspase	241	1.07842
	Caspase	242	-0.614394
	Caspase	243	1.23603
	Caspase	244	-0.769551
	Caspase	245	0.255514
	Caspase	1	-0.119186
	Caspase	2	-0.293282
	Caspase	3	1.0114
	Caspase	4	1.38012
	Caspase	5	1.03246
	Caspase	6	0.57461
	Caspase	7	0.891593
	Caspase	8	0.856427
	Caspase	9	0.385785
	Caspase	10	0.420781
	Caspase	11	0.819939
	Caspase	12	1.2578
	Caspase	13	1.08167
	Caspase	14	1.21843
	Caspase	15	0.476107
	Caspase	16	-0.924453
	Caspase	17	1.52785
	Caspase	18	0.636889
	Caspase	19	1.10309
	Caspase	20	0.50188
	Caspase	21	0.932474
	Caspase	22	1.33622
	Caspase	23	1.66805
	Caspase	24	0.278982
	Caspase	25	1.46244
	Caspase	26	0.450711
	Caspase	27	1.12189
	Caspase	28	0.710794
	Caspase	29	0.144574
	Caspase	30	0.529045
	Caspase	31	0.436957
	Caspase	32	0.444201
	Caspase	33	0.0378248
	Caspase	34	0.692759
	Caspase	35	0.863977
	Caspase	36	0.995196
	Caspase	37	0.522183
	Caspase	38	0.7074
	Caspase	39	1.085
	Caspase	40	1.50512
	Caspase	41	0.759819
	Caspase	42	0.470116
	Caspase	43	0.683137
	Caspase	44	0.415974
	Caspase	45	0.756256
	Caspase	46	0.717254
	Caspase	47	0.454845
	Caspase	48	1.32325
	Caspase	49	1.76646
	Caspase	50	0.43313
	Caspase	51	1.16794
	Caspase	52	0.45667
	Caspase	53	0.415474
	Caspase	54	-0.00833099
	Caspase	55	0.608098
	Caspase	56	0.86368
	Caspase	57	0.917558
	Caspase	58	0.90309
	Caspase	59	0.560982
	Caspase	60	0.222196
	Caspase	61	1.14662
	Caspase	62	1.30183
	Caspase	63	0.699491
	Caspase	64	0.672467
	Caspase	65	1.78337
	Caspase	66	1.61651
	Caspase	67	0.207904
	Caspase	68	0.469822
	Caspase	69	1.56881
	Caspase	70	0.863858
	Caspase	71	0.804753
	Caspase	72	0.569491
	Caspase	73	0.416141
	Caspase	74	0.103462
	Caspase	75	0.906066
	Caspase	76	1.03157
	Caspase	77	0.50637
	Caspase	78	0.50188
	Caspase	79	0.943198
	Caspase	80	0.495128
	Caspase	81	0.966236
	Caspase	82	0.663512
	Caspase	83	0.467756
	Caspase	84	1.42669
	Caspase	85	1.15119
	Caspase	86	0.586812
	Caspase	87	0.512284
	Caspase	88	1.31065
	Caspase	89	1.2707
	Caspase	90	1.41906
	Caspase	91	0.38003
	Caspase	92	0.188084
	Caspase	93	0.473779
	Caspase	94	-0.123205
	Caspase	95	0.642761
	Caspase	96	0.936413
	Caspase	97	0.536306
	Caspase	98	1.15537
	Caspase	99	1.58537
	Caspase	100	-0.238824
	Caspase	101	0.426511
	Caspase	102	-0.385103
	Caspase	103	0.0484418
	Caspase	104	-0.583359
	Caspase	105	0.525434
	Caspase	106	0.430881
	Caspase	107	1.31224
	Caspase	108	1.32035
	Caspase	109	1.01347
	Caspase	110	1.38911
	Caspase	111	1.72782
	Caspase	112	0.527759
	Caspase	113	1.20404
	Caspase	114	0.571942
	Caspase	115	0.814114
	Caspase	116	1.05065
	Caspase	117	0.430075
	Caspase	118	0.502837
	Caspase	119	0.912594
	Caspase	120	1.53246
	Caspase	121	0.411956
	Caspase	122	1.36994
	Caspase	123	0.403807
	Caspase	124	0.664078
	Caspase	125	1.52438
	Caspase	126	0.548021
	Caspase	127	-0.0877779
	Caspase	128	1.55671
	Caspase	129	0.379124
	Caspase	130	0.569374
	Caspase	131	1.01949
	Caspase	132	0.465383
	Caspase	133	0.21906
	Caspase	134	0.371806
	Caspase	135	0.860996
	Caspase	136	0.56914
	Caspase	137	1.31254
	Caspase	138	0.507586
	Caspase	139	0.55145
	Caspase	140	0.386856
	Caspase	141	0.202216
	Caspase	142	1.15284
	Caspase	143	0.57066
	Caspase	144	0.332236
	Caspase	145	0.0838608
	Caspase	146	0.876102
	Caspase	147	1.90842
	Caspase	148	0.529815
	Caspase	149	0.367729
	Caspase	150	1.09681
	Caspase	151	0.537693
	Caspase	152	1.11113
	Caspase	153	0.363988
	Caspase	154	0.627468
	Caspase	155	1.12094
	Caspase	156	1.23447
	Caspase	157	0.299289
	Caspase	158	0.300813
	Caspase	159	1.71139
	Caspase	160	1.59742
	Caspase	161	1.27485
	Caspase	162	1.66208
	tdTomato	1	2.36326
	tdTomato	2	1.50243
	tdTomato	3	0.211121
	tdTomato	4	1.67645
	tdTomato	5	2.01874
	tdTomato	6	0.697055
	tdTomato	7	-0.378824
	tdTomato	8	0.12969
	tdTomato	9	1.12018
	tdTomato	10	1.48303
	tdTomato	11	1.63516
	tdTomato	12	0.317018
	tdTomato	13	1.56646
	tdTomato	14	1.45139
	tdTomato	15	1.99675
	tdTomato	16	0.976579
	tdTomato	17	1.95494
	tdTomato	18	1.6908
	tdTomato	19	1.50081
	tdTomato	20	1.4542
	tdTomato	21	1.82874
	tdTomato	22	0.755417
	tdTomato	23	1.61038
	tdTomato	24	0.819544
	tdTomato	25	2.09074
	tdTomato	26	0.995108
	tdTomato	27	0.927781
	tdTomato	28	0.945272
	tdTomato	29	1.57128
	tdTomato	30	0.637189
	tdTomato	31	0.273001
	tdTomato	32	0.901186
	tdTomato	33	0.631545
	tdTomato	34	1.89639
	tdTomato	35	0.971461
	tdTomato	36	1.22871
	tdTomato	37	1.15969
	tdTomato	38	0.446071
	tdTomato	39	1.41607
	tdTomato	40	0.735918
	tdTomato	41	1.56825
	tdTomato	42	1.4128
	tdTomato	43	1.10524
	tdTomato	44	0.299943
	tdTomato	45	1.09008
	tdTomato	46	0.873146
	tdTomato	47	1.06435
	tdTomato	48	1.18946
	tdTomato	49	1.09771
	tdTomato	50	1.38719
	tdTomato	51	1.63126
	tdTomato	52	0.722881
	tdTomato	53	1.75978
	tdTomato	54	1.2769
	tdTomato	55	1.49792
	tdTomato	56	1.22513
	tdTomato	57	1.00796
	tdTomato	58	0.940218
	tdTomato	59	1.75349
	tdTomato	60	0.343802
	tdTomato	61	0.159868
	tdTomato	62	0.72049
	tdTomato	63	0.584444
	tdTomato	64	0.755417
	tdTomato	65	1.40111
	tdTomato	66	0.846585
	tdTomato	67	0.00302947
	tdTomato	68	0.727134
	tdTomato	69	1.393
	tdTomato	70	0.751818
	tdTomato	71	0.868644
	tdTomato	72	1.54228
	tdTomato	73	0.921114
	tdTomato	74	1.14768
	tdTomato	75	0.124178
	tdTomato	76	1.12506
	tdTomato	77	1.14139
	tdTomato	78	0.728273
	tdTomato	79	0.846708
	tdTomato	80	1.083
	tdTomato	81	1.63891
	tdTomato	82	1.24733
	tdTomato	83	1.46318
	tdTomato	84	0.928345
	tdTomato	85	0.484015
	tdTomato	86	1.24485
	tdTomato	87	-0.0254883
	tdTomato	88	1.23464
	tdTomato	89	1.51294
	tdTomato	90	0.811709
	tdTomato	91	1.11504
	tdTomato	92	0.715836
	tdTomato	93	0.881841
	tdTomato	94	0.71307
	tdTomato	95	1.24485
	tdTomato	96	1.17041
	tdTomato	97	1.25732
	tdTomato	98	0.698709
	tdTomato	99	1.695
	tdTomato	100	0.790707
	tdTomato	101	0.95376
	tdTomato	102	0.906227
	tdTomato	103	1.067
	tdTomato	104	-0.0584886
	tdTomato	105	0.892039
	tdTomato	106	0.640283
	tdTomato	107	0.919026
	tdTomato	108	0.854306
	tdTomato	109	0.663701
	tdTomato	110	0.63739
	tdTomato	111	1.66839
	tdTomato	112	1.27265
	tdTomato	113	0.453318
	tdTomato	114	-0.0963675
	tdTomato	1	-0.785156
	tdTomato	2	2.0749
	tdTomato	3	1.20347
	tdTomato	4	2.1699
	tdTomato	5	0.912859
	tdTomato	6	1.07306
	tdTomato	7	1.25137
	tdTomato	8	0.310056
	tdTomato	9	1.38046
	tdTomato	10	1.61829
	tdTomato	11	0.675595
	tdTomato	12	1.46598
	tdTomato	13	0.971369
	tdTomato	14	1.01557
	tdTomato	15	0.772248
	tdTomato	16	0.957703
	tdTomato	17	0.631748
	tdTomato	18	0.984797
	tdTomato	19	1.28836
	tdTomato	20	0.779308
	tdTomato	21	1.62452
	tdTomato	22	1.1182
	tdTomato	23	0.81697
	tdTomato	24	1.45017
	tdTomato	25	0.410777
	tdTomato	26	1.86016
	tdTomato	27	0.808346
	tdTomato	28	1.87706
	tdTomato	29	1.51817
	tdTomato	30	1.9963
	tdTomato	31	0.435844
	tdTomato	32	1.00445
	tdTomato	33	1.5293
	tdTomato	34	1.54189
	tdTomato	35	0.774882
	tdTomato	36	2.08084
	tdTomato	37	0.824126
	tdTomato	38	1.43766
	tdTomato	39	0.585009
	tdTomato	40	1.21706
	tdTomato	41	0.975937
	tdTomato	42	0.856245
	tdTomato	43	0.813781
	tdTomato	44	1.64587
	tdTomato	45	1.43119
	tdTomato	46	1.56023
	tdTomato	47	0.902818
	tdTomato	48	0.742568
	tdTomato	49	0.790144
	tdTomato	50	2.19509
	tdTomato	51	1.33638
	tdTomato	52	0.982633
	tdTomato	53	0.962559
	tdTomato	54	2.13449
	tdTomato	55	0.997648
	tdTomato	56	1.86104
	tdTomato	57	0.848559
	tdTomato	58	1.40538
	tdTomato	59	0.261263
	tdTomato	60	0.545307
	tdTomato	61	0.176381
	tdTomato	62	0.106531
	tdTomato	63	1.43462
	tdTomato	64	1.33712
	tdTomato	65	0.262214
	tdTomato	66	0.658774
	tdTomato	67	1.42449
	tdTomato	68	1.06945
	tdTomato	69	1.69973
	tdTomato	70	1.75644
	tdTomato	71	0.441538
	tdTomato	72	0.578525
	tdTomato	73	1.0778
	tdTomato	74	0.866701
	tdTomato	1	-0.675718
	tdTomato	2	2.37981
	tdTomato	3	0.766636
	tdTomato	4	1.40243
	tdTomato	5	1.6268
	tdTomato	6	0.448242
	tdTomato	7	1.27552
	tdTomato	8	1.62123
	tdTomato	9	0.784046
	tdTomato	10	0.292699
	tdTomato	11	0.82007
	tdTomato	12	1.73032
	tdTomato	13	0.986637
	tdTomato	14	0.273927
	tdTomato	15	1.50607
	tdTomato	16	1.14348
	tdTomato	17	0.653984
	tdTomato	18	1.04852
	tdTomato	19	1.86878
	tdTomato	20	0.952405
	tdTomato	21	0.633872
	tdTomato	22	1.28954
	tdTomato	23	1.37151
	tdTomato	24	0.561101
	tdTomato	25	0.965202
	tdTomato	26	1.38207
	tdTomato	27	1.74017
	tdTomato	28	0.479575
	tdTomato	29	0.731669
	tdTomato	30	1.72652
	tdTomato	31	0.570309
	tdTomato	32	1.51186
	tdTomato	33	2.09045
	tdTomato	34	1.35
	tdTomato	35	2.01862
	tdTomato	36	1.61877
	tdTomato	37	1.43689
	tdTomato	38	1.66769
	tdTomato	39	1.43074
	tdTomato	40	1.37297
	tdTomato	41	1.66684
	tdTomato	42	1.82002
	tdTomato	43	0.887336
	tdTomato	44	1.60561
	tdTomato	45	1.58697
	tdTomato	46	2.26593
	tdTomato	47	0.606596
	tdTomato	48	0.373464
	tdTomato	49	0.771587
	tdTomato	50	0.667079
	tdTomato	51	0.520484
	tdTomato	52	1.59249
	tdTomato	53	1.47135
	tdTomato	54	1.6474
	tdTomato	55	1.15171
	tdTomato	56	1.1209
	tdTomato	57	0.606059
	tdTomato	58	0.204391
	tdTomato	59	0.584331
	tdTomato	60	0.401056
	tdTomato	61	0.398634
	tdTomato	62	1.82097
	tdTomato	63	0.273464
	tdTomato	64	1.19404
	tdTomato	65	0.435207
	tdTomato	1	2.33324
	tdTomato	2	1.68886
	tdTomato	3	0.99025
	tdTomato	4	0.716254
	tdTomato	5	0.180986
	tdTomato	6	1.87687
	tdTomato	7	1.07933
	tdTomato	8	1.27149
	tdTomato	9	0.773933
	tdTomato	10	0.712313
	tdTomato	11	0.255996
	tdTomato	12	1.21685
	tdTomato	13	0.676876
	tdTomato	14	0.514548
	tdTomato	15	2.13253
	tdTomato	16	1.93605
	tdTomato	17	2.4471
	tdTomato	18	0.852907
	tdTomato	19	0.516668
	tdTomato	20	0.369587
	tdTomato	21	1.62659
	tdTomato	22	1.27948
	tdTomato	23	0.962795
	tdTomato	24	1.10694
	tdTomato	25	1.39896
	tdTomato	26	1.999
	tdTomato	27	0.539202
	tdTomato	28	0.609594
	tdTomato	29	1.07052
	tdTomato	30	1.04155
	tdTomato	31	1.00221
	tdTomato	32	1.38846
	tdTomato	33	0.383277
	tdTomato	34	1.86161
	tdTomato	35	0.647187
	tdTomato	36	1.21543
	tdTomato	37	0.971601
	tdTomato	38	1.79594
	tdTomato	39	0.857755
	tdTomato	40	1.17794
	tdTomato	41	1.26891
	tdTomato	42	1.51073
	tdTomato	43	2.02352
	tdTomato	44	0.425697
	tdTomato	45	1.59551
	tdTomato	46	0.617734
	tdTomato	47	1.47167
	tdTomato	48	1.7398
	tdTomato	49	0.37767
	tdTomato	50	1.36957
	tdTomato	51	1.53634
	tdTomato	52	1.26394
	tdTomato	53	1.33626
	tdTomato	54	0.987577
	tdTomato	55	0.398461
	tdTomato	56	2.19196
	tdTomato	57	0.337459
	tdTomato	58	1.07423
	tdTomato	59	-0.0604807
	tdTomato	60	0.710202
	tdTomato	1	2.29487
	tdTomato	2	2.1688
	tdTomato	3	0.857935
	tdTomato	4	0.43393
	tdTomato	5	0.0696681
	tdTomato	6	1.04477
	tdTomato	7	1.81449
	tdTomato	8	2.34702
	tdTomato	9	1.14771
	tdTomato	10	0.751048
	tdTomato	11	1.26722
	tdTomato	12	1.61979
	tdTomato	13	0.759366
	tdTomato	14	2.59514
	tdTomato	15	1.40269
	tdTomato	16	1.70441
	tdTomato	17	0.838408
	tdTomato	18	1.68984
	tdTomato	19	0.619198
	tdTomato	20	0.248954
	tdTomato	21	1.09527
	tdTomato	22	0.852663
	tdTomato	23	0.962748
	tdTomato	24	0.783832
	tdTomato	25	0.532372
	tdTomato	26	0.307496
	tdTomato	27	1.97735
	tdTomato	28	2.01447
	tdTomato	29	1.14569
	tdTomato	30	0.844104
	tdTomato	31	2.87581
	tdTomato	1	-0.402305
	tdTomato	2	0.896967
	tdTomato	3	0.806044
	tdTomato	4	1.24898
	tdTomato	5	1.25428
	tdTomato	6	0.783546
	tdTomato	7	-0.759451
	tdTomato	8	0.910304
	tdTomato	9	0.851747
	tdTomato	10	0.168792
	tdTomato	11	1.5301
	tdTomato	12	0.907196
	tdTomato	13	1.31175
	tdTomato	14	1.48782
	tdTomato	15	-0.578396
	tdTomato	16	0.333044
	tdTomato	17	1.14956
	tdTomato	18	0.537693
	tdTomato	19	0.351989
	tdTomato	20	2.29927
	tdTomato	21	1.68162
	tdTomato	22	1.5953
	tdTomato	23	0.726483
	tdTomato	24	1.20257
	tdTomato	25	0.612466
	tdTomato	26	1.00715
	tdTomato	27	1.35395
	tdTomato	28	0.752279
	tdTomato	29	0.320354
	tdTomato	30	1.09381
	tdTomato	31	1.44675
	tdTomato	32	-0.220404
	tdTomato	33	1.26637
	tdTomato	34	1.42529
	tdTomato	35	2.02534
	tdTomato	36	0.811307
	tdTomato	37	2.00083
	tdTomato	38	0.999043
	tdTomato	39	1.54838
	tdTomato	40	0.940915
	tdTomato	41	0.79162
	tdTomato	42	1.01326
	tdTomato	43	0.464191
	tdTomato	44	1.60625
	tdTomato	45	1.04984
	tdTomato	46	0.460597
	tdTomato	47	0.727623
	tdTomato	48	1.66275
	tdTomato	49	0.650987
	tdTomato	50	1.59026
	tdTomato	51	0.772688
	tdTomato	52	1.24272
	tdTomato	53	1.7872
	tdTomato	54	0.854792
	tdTomato	55	1.35572
	tdTomato	56	0.641771
	tdTomato	57	0.398287
	tdTomato	58	0.901948
	tdTomato	59	1.70485
	tdTomato	60	1.85899
	tdTomato	61	0.530968
	tdTomato	62	1.43859
	tdTomato	63	1.66311
	tdTomato	64	0.660011
	tdTomato	65	1.97523
	tdTomato	66	1.41032
	tdTomato	67	2.20895
	tdTomato	68	0.329805
	tdTomato	69	1.33574

## Sheet: Fig 3G
variable	coef	CI
Intercept	-1.09805	(0.237301927216365, 0.21802682263533268)
Trial	0.21381	(0.19229463746050518, 0.22919854458904337)
Virus: Caspase	0.474606	(0.32887353582402107, 0.2865611912873445)
Poke-time	0.295712	(0.1603340084106351, 0.15158478309086076)
Trial & Virus: Caspase	0.147408	(0.2848089558261496, 0.23850481523505573)
Poke-time & Virus: Caspase	-0.00844295	(0.21537312297264227, 0.21576214316917094)

## Sheet: Fig 3H
Virus	BinnedLogOut	Median	CI
tdTomato	-1	1	(0.0, 0.0)
tdTomato	-0.9	1	(0.0, 0.0)
tdTomato	-0.8	1	(0.0, 0.0)
tdTomato	-0.7	1	(0.0, 0.0)
tdTomato	-0.6	1	(0.0, 0.0)
tdTomato	-0.5	1	(0.0, 0.0)
tdTomato	-0.4	1	(0.0, 0.0)
tdTomato	-0.3	1	(0.0, 0.0)
tdTomato	-0.2	1	(0.0, 0.0)
tdTomato	-0.1	1	(0.0, 0.0)
tdTomato	0	1	(0.07763975155278258, 0.0)
tdTomato	0	1	(0.0, 0.0)
tdTomato	0.1	1	(0.0, 0.0)
tdTomato	0.2	1	(0.0, 0.0)
tdTomato	0.3	1	(0.0, 0.0)
tdTomato	0.4	1	(0.0, 0.0)
tdTomato	0.5	1	(0.0, 0.0)
tdTomato	0.6	0.989744	(0.016036310537069998, 0.01025554349286062)
tdTomato	0.7	0.847617	(0.06970997922381672, 0.06150089098901135)
tdTomato	0.8	0.654551	(0.02911302616139988, 0.0237393793445706)
tdTomato	0.9	0.599018	(0.04056771944705284, 0.04301614508026508)
tdTomato	1	0.542057	(0.016608857074057903, 0.034604771532562695)
tdTomato	1.1	0.518433	(0.03185495011514472, 0.03772494726365405)
tdTomato	1.2	0.430041	(0.06448644390634173, 0.026674873510244335)
tdTomato	1.3	0.328927	(0.03674424500568907, 0.052027468238198316)
tdTomato	1.4	0.301531	(0.046510987734080744, 0.041705051454443975)
tdTomato	1.5	0.239973	(0.03923067493884083, 0.049560074551722344)
tdTomato	1.6	0.223185	(0.026047827182606148, 0.043294218735202034)
tdTomato	1.7	0.186081	(0.02303001012856279, 0.036178355983139315)
tdTomato	1.8	0.131138	(0.020206102103874884, 0.023960463510257712)
tdTomato	1.9	0.110217	(0.029972303019900615, 0.018318426145725014)
tdTomato	2	0.0995338	(0.029242294463522514, 0.014006200721822501)
tdTomato	2.1	0.0859802	(0.021107617004658033, 0.01866551610013259)
tdTomato	2.2	0.0443541	(0.005700249678292635, 0.016077184579582023)
tdTomato	2.3	0.0393412	(0.02034586049018173, 0.01630536826488884)
tdTomato	2.4	0.0312327	(0.0028169562516485377, 0.042458559527224785)
tdTomato	2.5	0.0237414	(0.00047364638189019426, 0.0004736463818901977)
tdTomato	2.6	0.0234957	(0.00020262236522069696, 0.00020262236522069696)
tdTomato	2.8	0.0157267	(0.00023514766431728153, 0.00010535310788614)
tdTomato	2.9	0.0154443	(0.00022462998486803658, 0.00022462998486803484)
Caspase	-1	1	(0.0, 0.0)
Caspase	-0.9	1	(0.0, 0.0)
Caspase	-0.8	1	(0.0, 0.0)
Caspase	-0.7	1	(0.0, 0.0)
Caspase	-0.6	1	(0.0, 0.0)
Caspase	-0.5	1	(0.0, 0.0)
Caspase	-0.4	1	(0.0, 0.0)
Caspase	-0.3	1	(0.0, 0.0)
Caspase	-0.2	1	(0.0, 0.0)
Caspase	-0.1	1	(0.0, 0.0)
Caspase	0	1	(0.0, 0.0)
Caspase	0	1	(0.0, 0.0)
Caspase	0.1	1	(0.0, 0.0)
Caspase	0.2	1	(0.0, 0.0)
Caspase	0.3	1	(0.0, 0.0)
Caspase	0.4	1	(0.0, 0.0)
Caspase	0.5	1	(0.0, 0.0)
Caspase	0.6	0.909137	(0.04867232933139609, 0.027850894751755506)
Caspase	0.7	0.727738	(0.02491187167532949, 0.04149051838467044)
Caspase	0.8	0.653145	(0.036996614234897085, 0.02556581411059533)
Caspase	0.9	0.58092	(0.02856415583790728, 0.037432503621875446)
Caspase	1	0.458308	(0.025671757153069075, 0.04438934924212207)
Caspase	1.1	0.402844	(0.024091749090201064, 0.03791272308918353)
Caspase	1.2	0.319509	(0.03918247267840835, 0.05001636547449961)
Caspase	1.3	0.257089	(0.040148196891341914, 0.03197021550428075)
Caspase	1.4	0.21562	(0.028928508930737423, 0.03771742346833426)
Caspase	1.5	0.162397	(0.034645841059407934, 0.03775670003114576)
Caspase	1.6	0.113825	(0.011272083104375441, 0.018477535113650342)
Caspase	1.7	0.111707	(0.02471201706759689, 0.021506500026813147)
Caspase	1.8	0.0853194	(0.014618251919413322, 0.02563365039515411)
Caspase	1.9	0.0734533	(0.009133699789744251, 0.024672586136048155)
Caspase	2	0.0679627	(0.019930925254576404, 0.030938992905560028)
Caspase	2.1	0.0482319	(0.01580008455760748, 0.021663636712444242)
Caspase	2.2	0.0515318	(0.016546367836223215, 0.0013798385291477686)
Caspase	2.3	0.0471068	(0.0001773453515852355, 0.00017734535158524245)
Caspase	2.4	0.0148134	(0.0, 0.0)
Caspase	2.5	0.0159942	(0.0009394407143441322, 0.0009394407143441356)

## Sheet: Fig 3I
variable	coef	CI
Intercept	0.0192016	(0.09359695624152364, 0.08529855867015948)
PokeTime	-0.824898	(0.03478888944232894, 0.04070161061393163)
Group:Caspase	-0.0762333	(0.14056344308049862, 0.11396043011348073)
PokeTime&Group:Juveniles	-0.124285	(0.05332740766375685, 0.051698121532980826)

## Sheet: Virus_PokeData
Pre-processed data	MouseID	Virus	Sex	Side	Streak	Poke	Correct	In	Out
	CD02	tdTomato	M	L	1	1	FALSE	0	0.715
	CD02	tdTomato	M	R	2	2	TRUE	0	3.141
	CD02	tdTomato	M	R	2	3	TRUE	32.844	32.965
	CD02	tdTomato	M	R	2	4	FALSE	42.6	45.418
	CD02	tdTomato	M	L	3	5	TRUE	0	3.162
	CD02	tdTomato	M	L	3	6	FALSE	3.649	4.363
	CD02	tdTomato	M	L	3	7	FALSE	8.482	8.658
	CD02	tdTomato	M	L	3	8	FALSE	9.115	10.135
	CD02	tdTomato	M	L	3	9	FALSE	25.773	26.628
	CD02	tdTomato	M	L	3	10	FALSE	32.678	33.29
	CD02	tdTomato	M	R	4	11	TRUE	0	0.162
	CD02	tdTomato	M	R	4	12	FALSE	0.25	2.014
	CD02	tdTomato	M	R	4	13	FALSE	5.134	5.379
	CD02	tdTomato	M	R	4	14	FALSE	5.563	7.286
	CD02	tdTomato	M	L	5	15	TRUE	0	1.412
	CD02	tdTomato	M	L	5	16	FALSE	3.375	4.133
	CD02	tdTomato	M	R	6	17	TRUE	0	0.349
	CD02	tdTomato	M	R	6	18	FALSE	1.099	2.036
	CD02	tdTomato	M	R	6	19	FALSE	2.547	3.316
	CD02	tdTomato	M	R	6	20	FALSE	8.345	9.617
	CD02	tdTomato	M	R	6	21	FALSE	13.149	13.373
	CD02	tdTomato	M	L	7	22	TRUE	0	0.93
	CD02	tdTomato	M	R	8	23	FALSE	0	0.242
	CD02	tdTomato	M	L	9	24	TRUE	0	0.474
	CD02	tdTomato	M	L	9	25	FALSE	0.549	0.966
	CD02	tdTomato	M	L	9	26	FALSE	94.059	95.831
	CD02	tdTomato	M	L	9	27	FALSE	97.928	98.781
	CD02	tdTomato	M	L	9	28	FALSE	102.065	102.716
	CD02	tdTomato	M	L	9	29	FALSE	110.747	111.258
	CD02	tdTomato	M	L	9	30	FALSE	147.543	148.789
	CD02	tdTomato	M	R	10	31	TRUE	0	2.335
	CD02	tdTomato	M	R	10	32	FALSE	3.656	5.277
	CD02	tdTomato	M	R	10	33	FALSE	6.912	7.252
	CD02	tdTomato	M	R	10	34	FALSE	7.427	7.804
	CD02	tdTomato	M	R	10	35	FALSE	16.63	17.116
	CD02	tdTomato	M	R	10	36	FALSE	21.356	21.92
	CD02	tdTomato	M	R	10	37	FALSE	22.178	22.962
	CD02	tdTomato	M	L	11	38	TRUE	0	0.264
	CD02	tdTomato	M	L	11	39	FALSE	1.419	3.825
	CD02	tdTomato	M	L	11	40	FALSE	7.214	7.899
	CD02	tdTomato	M	L	11	41	FALSE	72.495	73.42
	CD02	tdTomato	M	R	12	42	TRUE	0	0.514
	CD02	tdTomato	M	R	12	43	FALSE	28.448	28.621
	CD02	tdTomato	M	R	12	44	FALSE	28.842	29.193
	CD02	tdTomato	M	R	12	45	FALSE	80.911	81.214
	CD02	tdTomato	M	L	13	46	TRUE	0	1.116
	CD02	tdTomato	M	R	14	47	TRUE	0	2.021
	CD02	tdTomato	M	R	14	48	FALSE	11.052	12.71
	CD02	tdTomato	M	R	14	49	FALSE	14.328	14.645
	CD02	tdTomato	M	R	14	50	FALSE	14.804	15.269
	CD02	tdTomato	M	R	14	51	FALSE	17.181	18.005
	CD02	tdTomato	M	L	15	52	TRUE	0	2.141
	CD02	tdTomato	M	L	15	53	FALSE	4.257	5.813
	CD02	tdTomato	M	L	15	54	FALSE	7.142	8.668
	CD02	tdTomato	M	L	15	55	FALSE	9.265	9.509
	CD02	tdTomato	M	L	15	56	FALSE	41.33	42.425
	CD02	tdTomato	M	L	15	57	FALSE	46.493	47.762
	CD02	tdTomato	M	L	15	58	FALSE	50.33	51.171
	CD02	tdTomato	M	L	15	59	FALSE	73.088	73.62
	CD02	tdTomato	M	R	16	60	TRUE	0	3.196
	CD02	tdTomato	M	R	16	61	FALSE	5.917	6.741
	CD02	tdTomato	M	L	17	62	TRUE	0	2.688
	CD02	tdTomato	M	R	18	63	TRUE	0	0.772
	CD02	tdTomato	M	R	18	64	FALSE	1.024	4.012
	CD02	tdTomato	M	R	18	65	FALSE	25.405	26.538
	CD02	tdTomato	M	R	18	66	FALSE	27.89	28.263
	CD02	tdTomato	M	L	19	67	TRUE	0	1.086
	CD02	tdTomato	M	R	20	68	TRUE	0	1.554
	CD02	tdTomato	M	L	21	69	TRUE	0	0.993
	CD02	tdTomato	M	L	21	70	FALSE	7.713	8.79
	CD02	tdTomato	M	L	21	71	FALSE	13.427	14.043
	CD02	tdTomato	M	R	22	72	TRUE	0	2.052
	CD02	tdTomato	M	R	22	73	FALSE	8.81	9.442
	CD02	tdTomato	M	R	22	74	FALSE	85.051	85.55
	CD02	tdTomato	M	R	22	75	FALSE	194.009	194.521
	CD02	tdTomato	M	L	23	76	TRUE	0	1.78
	CD02	tdTomato	M	L	23	77	FALSE	6.021	6.78
	CD02	tdTomato	M	R	24	78	TRUE	0	2.363
	CD02	tdTomato	M	R	24	79	FALSE	4.016	4.653
	CD02	tdTomato	M	R	24	80	FALSE	7.871	8.397
	CD02	tdTomato	M	L	25	81	TRUE	0	2.527
	CD02	tdTomato	M	L	25	82	FALSE	7.062	8.124
	CD02	tdTomato	M	L	25	83	FALSE	8.363	9.252
	CD02	tdTomato	M	R	26	84	TRUE	0	2.792
	CD02	tdTomato	M	R	26	85	FALSE	145.501	146.283
	CD02	tdTomato	M	R	26	86	FALSE	146.563	147.568
	CD02	tdTomato	M	R	26	87	FALSE	150.409	150.927
	CD02	tdTomato	M	R	26	88	FALSE	159.248	159.382
	CD02	tdTomato	M	R	26	89	FALSE	227.346	228.428
	CD02	tdTomato	M	R	26	90	FALSE	229.367	229.779
	CD02	tdTomato	M	R	26	91	FALSE	244.135	244.694
	CD02	tdTomato	M	L	27	92	TRUE	0	1.973
	CD02	tdTomato	M	L	27	93	FALSE	2.003	2.617
	CD02	tdTomato	M	L	27	94	FALSE	3.926	4.633
	CD02	tdTomato	M	L	27	95	FALSE	6.112	7.389
	CD02	tdTomato	M	R	28	96	TRUE	0	2.197
	CD02	tdTomato	M	R	28	97	FALSE	5.523	6.411
	CD02	tdTomato	M	R	28	98	FALSE	8.825	9.679
	CD02	tdTomato	M	R	28	99	FALSE	10.159	10.615
	CD02	tdTomato	M	R	28	100	FALSE	42.889	43.425
	CD02	tdTomato	M	L	29	101	TRUE	0	1.684
	CD02	tdTomato	M	L	29	102	FALSE	2.049	2.194
	CD02	tdTomato	M	L	29	103	FALSE	2.217	2.383
	CD02	tdTomato	M	L	29	104	FALSE	2.405	3.868
	CD02	tdTomato	M	L	29	105	FALSE	16.242	17.06
	CD02	tdTomato	M	L	29	106	FALSE	28.717	28.828
	CD02	tdTomato	M	L	29	107	FALSE	94.661	95.292
	CD02	tdTomato	M	R	30	108	TRUE	0	2.558
	CD02	tdTomato	M	R	30	109	FALSE	4.025	4.426
	CD02	tdTomato	M	L	31	110	TRUE	0	1.162
	CD02	tdTomato	M	L	31	111	FALSE	77.628	78.31
	CD02	tdTomato	M	L	31	112	FALSE	151.501	152.624
	CD02	tdTomato	M	L	31	113	FALSE	173.641	174.555
	CD02	tdTomato	M	R	32	114	TRUE	0	2.985
	CD02	tdTomato	M	R	32	115	FALSE	11.535	12.507
	CD02	tdTomato	M	L	33	116	TRUE	0	1.755
	CD02	tdTomato	M	L	33	117	FALSE	3.128	4.167
	CD02	tdTomato	M	L	33	118	FALSE	13.533	16.582
	CD02	tdTomato	M	L	33	119	FALSE	22.21	24.535
	CD02	tdTomato	M	L	33	120	FALSE	30.453	31.762
	CD02	tdTomato	M	L	33	121	FALSE	61.396	62.718
	CD02	tdTomato	M	L	33	122	FALSE	67.496	68.463
	CD02	tdTomato	M	R	34	123	TRUE	0	1.684
	CD02	tdTomato	M	R	34	124	FALSE	3.943	5.737
	CD02	tdTomato	M	R	34	125	FALSE	88.913	89.901
	CD02	tdTomato	M	R	34	126	FALSE	219.781	220.416
	CD04	tdTomato	F	L	1	1	TRUE	0	0.194
	CD04	tdTomato	F	R	2	2	TRUE	0	0.121
	CD04	tdTomato	F	R	2	3	FALSE	166.149	166.527
	CD04	tdTomato	F	R	2	4	FALSE	168.376	174.627
	CD04	tdTomato	F	R	2	5	FALSE	174.704	175.683
	CD04	tdTomato	F	R	2	6	FALSE	189.496	193.127
	CD04	tdTomato	F	R	2	7	FALSE	219.945	220.876
	CD04	tdTomato	F	L	3	8	TRUE	0	2.093
	CD04	tdTomato	F	L	3	9	FALSE	21.273	21.936
	CD04	tdTomato	F	L	3	10	FALSE	77.961	79.044
	CD04	tdTomato	F	R	4	11	TRUE	0	2.189
	CD04	tdTomato	F	R	4	12	TRUE	7.484	9.841
	CD04	tdTomato	F	R	4	13	FALSE	48.583	49.932
	CD04	tdTomato	F	R	4	14	FALSE	56.196	57.087
	CD04	tdTomato	F	R	4	15	FALSE	77.659	79.919
	CD04	tdTomato	F	L	5	16	TRUE	0	1.683
	CD04	tdTomato	F	L	5	17	FALSE	2.333	3.094
	CD04	tdTomato	F	L	5	18	FALSE	5.747	7.135
	CD04	tdTomato	F	L	5	19	FALSE	28.58	28.921
	CD04	tdTomato	F	L	5	20	FALSE	29.999	31.194
	CD04	tdTomato	F	R	6	21	TRUE	0	1.9
	CD04	tdTomato	F	L	7	22	TRUE	0	1.455
	CD04	tdTomato	F	L	7	23	FALSE	1.619	2.688
	CD04	tdTomato	F	R	8	24	TRUE	0	1.409
	CD04	tdTomato	F	R	8	25	FALSE	1.457	2.018
	CD04	tdTomato	F	R	8	26	FALSE	3.043	4.164
	CD04	tdTomato	F	R	8	27	FALSE	5.353	6.548
	CD04	tdTomato	F	R	8	28	FALSE	6.693	6.987
	CD04	tdTomato	F	R	8	29	FALSE	9.799	10.824
	CD04	tdTomato	F	L	9	30	TRUE	0	1.975
	CD04	tdTomato	F	L	9	31	FALSE	3.638	4.982
	CD04	tdTomato	F	L	9	32	FALSE	5.482	5.966
	CD04	tdTomato	F	L	9	33	FALSE	10.582	10.955
	CD04	tdTomato	F	R	10	34	TRUE	0	2.977
	CD04	tdTomato	F	R	10	35	FALSE	23.967	25.831
	CD04	tdTomato	F	L	11	36	TRUE	0	1.602
	CD04	tdTomato	F	L	11	37	FALSE	15.981	16.325
	CD04	tdTomato	F	L	11	38	FALSE	47.746	48.688
	CD04	tdTomato	F	R	12	39	TRUE	0	0.176
	CD04	tdTomato	F	R	12	40	FALSE	0.188	2.454
	CD04	tdTomato	F	R	12	41	FALSE	2.492	2.91
	CD04	tdTomato	F	R	12	42	FALSE	20.631	21.755
	CD04	tdTomato	F	R	12	43	FALSE	21.788	22.445
	CD04	tdTomato	F	R	12	44	FALSE	55.467	56.209
	CD04	tdTomato	F	L	13	45	TRUE	0	1.028
	CD04	tdTomato	F	L	13	46	FALSE	14.456	14.62
	CD04	tdTomato	F	L	13	47	FALSE	58.212	58.996
	CD04	tdTomato	F	R	14	48	TRUE	0	2.118
	CD04	tdTomato	F	L	15	49	TRUE	0	1.59
	CD04	tdTomato	F	R	16	50	TRUE	0	2.111
	CD04	tdTomato	F	R	16	51	FALSE	5.188	6.31
	CD04	tdTomato	F	R	16	52	FALSE	7.358	7.859
	CD04	tdTomato	F	L	17	53	TRUE	0	0.36
	CD04	tdTomato	F	L	17	54	FALSE	0.729	0.83
	CD04	tdTomato	F	L	17	55	FALSE	0.924	2.619
	CD04	tdTomato	F	L	17	56	FALSE	4.652	4.767
	CD04	tdTomato	F	L	17	57	FALSE	6.525	6.687
	CD04	tdTomato	F	L	17	58	FALSE	6.871	7.035
	CD04	tdTomato	F	L	17	59	FALSE	8.471	9.452
	CD04	tdTomato	F	R	18	60	TRUE	0	1.778
	CD04	tdTomato	F	R	18	61	FALSE	1.839	4.199
	CD04	tdTomato	F	L	19	62	TRUE	0	2.957
	CD04	tdTomato	F	L	19	63	FALSE	5.606	6.684
	CD04	tdTomato	F	R	20	64	TRUE	0	3.44
	CD04	tdTomato	F	R	20	65	FALSE	4.474	5.072
	CD04	tdTomato	F	R	20	66	FALSE	6.333	7.952
	CD04	tdTomato	F	R	20	67	FALSE	11.434	12.835
	CD04	tdTomato	F	R	20	68	FALSE	27.462	27.969
	CD04	tdTomato	F	L	21	69	TRUE	0	1.627
	CD04	tdTomato	F	L	21	70	FALSE	23.569	24.754
	CD04	tdTomato	F	R	22	71	TRUE	0	2.207
	CD04	tdTomato	F	R	22	72	FALSE	2.677	3.573
	CD04	tdTomato	F	L	23	73	TRUE	0	0.265
	CD04	tdTomato	F	R	24	74	TRUE	0	2.875
	CD04	tdTomato	F	L	25	75	TRUE	0	2.59
	CD04	tdTomato	F	R	26	76	TRUE	0	1.67
	CD04	tdTomato	F	R	26	77	TRUE	1.939	3.368
	CD04	tdTomato	F	R	26	78	FALSE	4.783	6.118
	CD04	tdTomato	F	R	26	79	FALSE	9.909	11.236
	CD04	tdTomato	F	L	27	80	TRUE	0	2.285
	CD04	tdTomato	F	L	27	81	FALSE	3.052	3.851
	CD04	tdTomato	F	L	27	82	FALSE	11.647	12.427
	CD04	tdTomato	F	L	27	83	FALSE	68.686	69.863
	CD04	tdTomato	F	R	28	84	TRUE	0	1.634
	CD04	tdTomato	F	R	28	85	FALSE	4.932	5.724
	CD04	tdTomato	F	L	29	86	TRUE	0	2.268
	CD04	tdTomato	F	R	30	87	TRUE	0	3.39
	CD04	tdTomato	F	L	31	88	TRUE	0	2.339
	CD04	tdTomato	F	L	31	89	FALSE	3.157	3.699
	CD04	tdTomato	F	L	31	90	FALSE	6.315	7.302
	CD04	tdTomato	F	R	32	91	TRUE	0	3.417
	CD04	tdTomato	F	R	32	92	FALSE	3.606	4.104
	CD04	tdTomato	F	L	33	93	TRUE	0	0.908
	CD04	tdTomato	F	L	33	94	TRUE	10.602	12.468
	CD04	tdTomato	F	L	33	95	FALSE	15.246	16.825
	CD04	tdTomato	F	L	33	96	FALSE	16.848	17.089
	CD04	tdTomato	F	L	33	97	FALSE	33.249	34.323
	CD04	tdTomato	F	R	34	98	TRUE	0	2.363
	CD04	tdTomato	F	R	34	99	FALSE	6.695	7.541
	CD04	tdTomato	F	R	34	100	FALSE	32.47	33.13
	CD04	tdTomato	F	R	34	101	FALSE	41.331	42.446
	CD04	tdTomato	F	R	34	102	FALSE	45.525	46.461
	CD04	tdTomato	F	L	35	103	TRUE	0	0.697
	CD04	tdTomato	F	R	36	104	TRUE	0	2.887
	CD04	tdTomato	F	L	37	105	FALSE	0	1.208
	CD04	tdTomato	F	R	38	106	TRUE	0	3.733
	CD04	tdTomato	F	R	38	107	FALSE	5.473	6.696
	CD04	tdTomato	F	R	38	108	FALSE	9.454	11.966
	CD04	tdTomato	F	R	38	109	FALSE	19.197	19.701
	CD04	tdTomato	F	L	39	110	TRUE	0	2.135
	CD04	tdTomato	F	L	39	111	FALSE	4.463	4.85
	CD04	tdTomato	F	L	39	112	FALSE	24.175	25.024
	CD04	tdTomato	F	R	40	113	TRUE	0	3.985
	CD04	tdTomato	F	R	40	114	FALSE	5.089	5.32
	CD04	tdTomato	F	R	40	115	FALSE	8.497	9.462
	CD04	tdTomato	F	R	40	116	FALSE	67.797	68.722
	CD04	tdTomato	F	R	40	117	FALSE	76.165	76.846
	CD04	tdTomato	F	L	41	118	TRUE	0	1.534
	CD04	tdTomato	F	L	41	119	FALSE	54.396	55.352
	CD04	tdTomato	F	L	41	120	FALSE	80.764	81.518
	CD04	tdTomato	F	R	42	121	TRUE	0	0.832
	CD04	tdTomato	F	L	43	122	TRUE	0	2.641
	CD04	tdTomato	F	L	43	123	FALSE	4.565	5.818
	CD04	tdTomato	F	L	43	124	FALSE	7.557	8.081
	CD04	tdTomato	F	R	44	125	TRUE	0	2.748
	CD04	tdTomato	F	R	44	126	FALSE	5.635	7.131
	CD04	tdTomato	F	R	44	127	FALSE	8.677	9.382
	CD04	tdTomato	F	R	44	128	FALSE	25.019	25.537
	CD04	tdTomato	F	L	45	129	TRUE	0	2.24
	CD04	tdTomato	F	L	45	130	FALSE	4.074	4.796
	CD04	tdTomato	F	R	46	131	TRUE	0	2.964
	CD04	tdTomato	F	R	46	132	FALSE	7.585	8.292
	CD04	tdTomato	F	L	47	133	TRUE	0	2.809
	CD04	tdTomato	F	R	48	134	TRUE	0	3.745
	CD04	tdTomato	F	R	48	135	FALSE	4.512	6.538
	CD04	tdTomato	F	R	48	136	FALSE	13.27	13.832
	CD04	tdTomato	F	L	49	137	TRUE	0	2.168
	CD04	tdTomato	F	L	49	138	FALSE	6.409	7.682
	CD04	tdTomato	F	L	49	139	FALSE	11.362	12.116
	CD04	tdTomato	F	L	49	140	FALSE	13.697	14.642
	CD04	tdTomato	F	L	49	141	FALSE	27.732	28.227
	CD04	tdTomato	F	R	50	142	TRUE	0	2.599
	CD04	tdTomato	F	R	50	143	TRUE	20.625	22.726
	CD04	tdTomato	F	R	50	144	FALSE	53.544	54.332
	CD04	tdTomato	F	L	51	145	TRUE	0	0.164
	CD04	tdTomato	F	L	51	146	FALSE	0.453	1.433
	CD04	tdTomato	F	R	52	147	TRUE	0	1.734
	CD04	tdTomato	F	L	53	148	TRUE	0	2.326
	CD04	tdTomato	F	L	53	149	FALSE	7.458	8.025
	CD04	tdTomato	F	R	54	150	TRUE	0	2.623
	CD04	tdTomato	F	R	54	151	FALSE	26.506	27.305
	CD04	tdTomato	F	L	55	152	TRUE	0	1.507
	CD04	tdTomato	F	R	56	153	TRUE	0	1.606
	CD04	tdTomato	F	L	57	154	TRUE	0	1.845
	CD04	tdTomato	F	L	57	155	FALSE	3.966	4.604
	CD04	tdTomato	F	L	57	156	FALSE	9.661	10.117
	CD04	tdTomato	F	L	57	157	FALSE	10.352	11.769
	CD04	tdTomato	F	R	58	158	TRUE	0	1.343
	CD04	tdTomato	F	R	58	159	FALSE	30.885	31.786
	CD04	tdTomato	F	L	59	160	TRUE	0	1.746
	CD04	tdTomato	F	R	60	161	TRUE	0	2.529
	CD04	tdTomato	F	L	61	162	FALSE	0	0.814
	CD04	tdTomato	F	L	61	163	FALSE	1.625	1.95
	CD04	tdTomato	F	R	62	164	TRUE	0	2.677
	CD04	tdTomato	F	R	62	165	FALSE	7.939	8.35
	CD04	tdTomato	F	R	62	166	FALSE	8.652	9.592
	CD04	tdTomato	F	R	62	167	FALSE	13.352	14.501
	CD04	tdTomato	F	R	62	168	FALSE	14.637	14.958
	CD04	tdTomato	F	L	63	169	TRUE	0	1.452
	CD04	tdTomato	F	L	63	170	FALSE	5.405	5.515
	CD04	tdTomato	F	R	64	171	TRUE	0	2.579
	CD04	tdTomato	F	R	64	172	FALSE	7.168	8.333
	CD04	tdTomato	F	L	65	173	TRUE	0	2.354
	CD04	tdTomato	F	L	65	174	FALSE	2.514	3.466
	CD04	tdTomato	F	R	66	175	TRUE	0	3.197
	CD04	tdTomato	F	R	66	176	FALSE	5.524	6.447
	CD04	tdTomato	F	R	66	177	FALSE	9.167	9.716
	CD04	tdTomato	F	R	66	178	FALSE	53.787	54.315
	CD04	tdTomato	F	R	66	179	FALSE	54.668	55.632
	CD04	tdTomato	F	R	66	180	FALSE	154.764	155.581
	CD04	tdTomato	F	R	66	181	FALSE	192.413	193.029
	CD04	tdTomato	F	R	66	182	FALSE	334.359	334.874
	CD04	tdTomato	F	R	66	183	FALSE	369.572	370.237
	CD04	tdTomato	F	L	67	184	TRUE	0	2.215
	CD04	tdTomato	F	L	67	185	FALSE	2.424	2.623
	CD04	tdTomato	F	R	68	186	TRUE	0	2.463
	CD04	tdTomato	F	R	68	187	TRUE	6.106	11.447
	CD04	tdTomato	F	R	68	188	FALSE	94.154	95.387
	CD04	tdTomato	F	R	68	189	FALSE	95.414	95.729
	CD04	tdTomato	F	L	69	190	TRUE	0	1.019
	CD04	tdTomato	F	R	70	191	TRUE	0	2.521
	CD04	tdTomato	F	L	71	192	TRUE	0	1.708
	CD04	tdTomato	F	L	71	193	FALSE	9.01	9.547
	CD04	tdTomato	F	R	72	194	TRUE	0	3.196
	CD04	tdTomato	F	L	73	195	TRUE	0	1.64
	CD04	tdTomato	F	R	74	196	TRUE	0	2.845
	CD04	tdTomato	F	R	74	197	FALSE	6.914	8.779
	CD04	tdTomato	F	R	74	198	FALSE	11.424	11.958
	CD04	tdTomato	F	R	74	199	FALSE	39.352	40.333
	CD04	tdTomato	F	R	74	200	FALSE	40.549	41.233
	CD04	tdTomato	F	L	75	201	TRUE	0	2.185
	CD04	tdTomato	F	L	75	202	FALSE	2.387	3.376
	CD04	tdTomato	F	R	76	203	TRUE	0	2.742
	CD04	tdTomato	F	R	76	204	FALSE	6.483	7.458
	CD04	tdTomato	F	R	76	205	FALSE	7.604	7.719
	CD04	tdTomato	F	R	76	206	FALSE	8.59	8.754
	CD04	tdTomato	F	L	77	207	TRUE	0	2.02
	CD04	tdTomato	F	R	78	208	TRUE	0	1.481
	CD06	Caspase	M	R	1	1	FALSE	0	0.159
	CD06	Caspase	M	R	1	2	FALSE	5.195	5.516
	CD06	Caspase	M	R	1	3	FALSE	5.544	5.784
	CD06	Caspase	M	R	1	4	FALSE	6.205	6.406
	CD06	Caspase	M	L	2	5	TRUE	0	4.853
	CD06	Caspase	M	L	2	6	FALSE	4.973	5.791
	CD06	Caspase	M	L	2	7	FALSE	8.759	10.518
	CD06	Caspase	M	R	3	8	TRUE	0	3.273
	CD06	Caspase	M	R	3	9	FALSE	6.471	6.593
	CD06	Caspase	M	R	3	10	FALSE	6.629	7.05
	CD06	Caspase	M	R	3	11	FALSE	7.093	7.346
	CD06	Caspase	M	L	4	12	TRUE	0	0.925
	CD06	Caspase	M	L	4	13	FALSE	0.98	1.4
	CD06	Caspase	M	L	4	14	FALSE	23.425	23.895
	CD06	Caspase	M	L	4	15	FALSE	24.259	24.365
	CD06	Caspase	M	L	4	16	FALSE	24.642	25.096
	CD06	Caspase	M	R	5	17	TRUE	0	1.111
	CD06	Caspase	M	L	6	18	TRUE	0	0.736
	CD06	Caspase	M	L	6	19	FALSE	13.277	13.606
	CD06	Caspase	M	L	6	20	FALSE	32.908	33.198
	CD06	Caspase	M	R	7	21	TRUE	0	2.271
	CD06	Caspase	M	L	8	22	TRUE	0	2.028
	CD06	Caspase	M	L	8	23	FALSE	14.201	15.733
	CD06	Caspase	M	L	8	24	FALSE	19.769	19.9
	CD06	Caspase	M	L	8	25	FALSE	20.96	21.274
	CD06	Caspase	M	R	9	26	TRUE	0	0.352
	CD06	Caspase	M	R	9	27	FALSE	30.515	32.128
	CD06	Caspase	M	R	9	28	FALSE	32.177	32.829
	CD06	Caspase	M	L	10	29	TRUE	0	1.251
	CD06	Caspase	M	L	10	30	FALSE	3.106	3.625
	CD06	Caspase	M	L	10	31	FALSE	10.677	10.853
	CD06	Caspase	M	L	10	32	FALSE	11.154	11.999
	CD06	Caspase	M	R	11	33	TRUE	0	1.81
	CD06	Caspase	M	R	11	34	FALSE	8.679	10.078
	CD06	Caspase	M	R	11	35	FALSE	10.357	11.268
	CD06	Caspase	M	L	12	36	TRUE	0	1.504
	CD06	Caspase	M	L	12	37	FALSE	2.866	3.963
	CD06	Caspase	M	R	13	38	TRUE	0	1.236
	CD06	Caspase	M	R	13	39	FALSE	1.3	1.721
	CD06	Caspase	M	R	13	40	FALSE	3.6	4.357
	CD06	Caspase	M	L	14	41	TRUE	0	0.58
	CD06	Caspase	M	L	14	42	FALSE	0.692	1.351
	CD06	Caspase	M	L	14	43	FALSE	1.561	2.082
	CD06	Caspase	M	L	14	44	FALSE	2.13	3.127
	CD06	Caspase	M	L	14	45	FALSE	3.134	4.512
	CD06	Caspase	M	R	15	46	TRUE	0	0.895
	CD06	Caspase	M	R	15	47	FALSE	5.236	5.517
	CD06	Caspase	M	R	15	48	FALSE	41.134	41.95
	CD06	Caspase	M	R	15	49	FALSE	42.026	42.604
	CD06	Caspase	M	R	15	50	FALSE	57.739	57.982
	CD06	Caspase	M	R	15	51	FALSE	58.359	58.509
	CD06	Caspase	M	R	15	52	FALSE	59.33	60.164
	CD06	Caspase	M	R	15	53	FALSE	60.488	60.783
	CD06	Caspase	M	R	15	54	FALSE	61.124	61.371
	CD06	Caspase	M	L	16	55	TRUE	0	3.159
	CD06	Caspase	M	L	16	56	FALSE	14.317	15.264
	CD06	Caspase	M	L	16	57	FALSE	17.074	18.241
	CD06	Caspase	M	R	17	58	TRUE	0	2.799
	CD06	Caspase	M	L	18	59	TRUE	0	1.843
	CD06	Caspase	M	L	18	60	TRUE	3.442	5.376
	CD06	Caspase	M	L	18	61	FALSE	9.156	9.847
	CD06	Caspase	M	R	19	62	TRUE	0	2.025
	CD06	Caspase	M	R	19	63	FALSE	12.601	13.429
	CD06	Caspase	M	L	20	64	TRUE	0	0.517
	CD06	Caspase	M	L	20	65	FALSE	19.97	21.031
	CD06	Caspase	M	L	20	66	FALSE	22.8	23.574
	CD06	Caspase	M	L	20	67	FALSE	33.362	33.792
	CD06	Caspase	M	R	21	68	TRUE	0	0.54
	CD06	Caspase	M	R	21	69	FALSE	1.13	1.625
	CD06	Caspase	M	R	21	70	FALSE	3.112	3.402
	CD06	Caspase	M	L	22	71	TRUE	0	0.101
	CD06	Caspase	M	L	22	72	FALSE	47.566	49.722
	CD06	Caspase	M	L	22	73	FALSE	50.58	51.706
	CD06	Caspase	M	L	22	74	FALSE	52.338	52.488
	CD06	Caspase	M	L	22	75	FALSE	60.622	61.416
	CD06	Caspase	M	R	23	76	TRUE	0	2.033
	CD06	Caspase	M	L	24	77	TRUE	0	1.811
	CD06	Caspase	M	L	24	78	FALSE	5.611	6.885
	CD06	Caspase	M	L	24	79	FALSE	7.034	7.412
	CD06	Caspase	M	R	25	80	TRUE	0	3.417
	CD06	Caspase	M	R	25	81	FALSE	5.078	6.272
	CD06	Caspase	M	R	25	82	FALSE	12.234	12.803
	CD06	Caspase	M	L	26	83	TRUE	0	2.198
	CD06	Caspase	M	L	26	84	TRUE	8.434	10.265
	CD06	Caspase	M	L	26	85	FALSE	11.424	12.463
	CD06	Caspase	M	R	27	86	TRUE	0	1.394
	CD06	Caspase	M	R	27	87	FALSE	1.421	2.126
	CD06	Caspase	M	R	27	88	FALSE	2.283	2.615
	CD06	Caspase	M	R	27	89	FALSE	2.717	2.935
	CD06	Caspase	M	R	27	90	FALSE	30.973	32.171
	CD06	Caspase	M	R	27	91	FALSE	42.612	43.089
	CD06	Caspase	M	L	28	92	TRUE	0	2.216
	CD06	Caspase	M	R	29	93	TRUE	0	2.252
	CD06	Caspase	M	R	29	94	FALSE	11.386	12.144
	CD06	Caspase	M	L	30	95	TRUE	0	2.381
	CD06	Caspase	M	R	31	96	TRUE	0	2.418
	CD06	Caspase	M	R	31	97	FALSE	4.323	5.05
	CD06	Caspase	M	L	32	98	TRUE	0	2.316
	CD06	Caspase	M	L	32	99	FALSE	2.605	3.111
	CD06	Caspase	M	L	32	100	FALSE	3.489	4.444
	CD06	Caspase	M	R	33	101	TRUE	0	2.163
	CD06	Caspase	M	R	33	102	FALSE	4.804	5.314
	CD06	Caspase	M	L	34	103	TRUE	0	2.673
	CD06	Caspase	M	L	34	104	FALSE	4.78	5.796
	CD06	Caspase	M	L	34	105	FALSE	6.722	7.185
	CD06	Caspase	M	R	35	106	TRUE	0	1.003
	CD06	Caspase	M	L	36	107	TRUE	0	1.89
	CD06	Caspase	M	L	36	108	FALSE	6.078	7.126
	CD06	Caspase	M	L	36	109	FALSE	10.448	10.895
	CD06	Caspase	M	R	37	110	TRUE	0	1.819
	CD06	Caspase	M	R	37	111	FALSE	2.219	2.606
	CD06	Caspase	M	L	38	112	TRUE	0	1.575
	CD06	Caspase	M	L	38	113	FALSE	2.315	2.793
	CD06	Caspase	M	L	38	114	FALSE	3.977	4.879
	CD06	Caspase	M	R	39	115	TRUE	0	1.783
	CD06	Caspase	M	R	39	116	FALSE	2.282	2.606
	CD06	Caspase	M	R	39	117	FALSE	5.066	5.217
	CD06	Caspase	M	L	40	118	TRUE	0	0.105
	CD06	Caspase	M	L	40	119	FALSE	0.186	1.968
	CD06	Caspase	M	L	40	120	FALSE	17.485	18.883
	CD06	Caspase	M	L	40	121	FALSE	19.258	19.608
	CD06	Caspase	M	R	41	122	TRUE	0	1.752
	CD06	Caspase	M	R	41	123	TRUE	7.691	9.921
	CD06	Caspase	M	L	42	124	TRUE	0	2.578
	CD06	Caspase	M	L	42	125	FALSE	2.827	3.131
	CD06	Caspase	M	L	42	126	FALSE	3.374	3.818
	CD06	Caspase	M	L	42	127	FALSE	5.41	6.272
	CD06	Caspase	M	R	43	128	TRUE	0	1.508
	CD06	Caspase	M	R	43	129	FALSE	1.557	1.868
	CD06	Caspase	M	R	43	130	FALSE	3.336	3.825
	CD06	Caspase	M	R	43	131	FALSE	4.805	5.532
	CD06	Caspase	M	L	44	132	TRUE	0	2.28
	CD06	Caspase	M	R	45	133	TRUE	0	2.289
	CD06	Caspase	M	R	45	134	FALSE	4.769	5.228
	CD06	Caspase	M	R	45	135	FALSE	5.346	5.566
	CD06	Caspase	M	L	46	136	TRUE	0	2.409
	CD06	Caspase	M	L	46	137	FALSE	4.937	5.765
	CD06	Caspase	M	R	47	138	TRUE	0	1.744
	CD06	Caspase	M	L	48	139	TRUE	0	2.332
	CD06	Caspase	M	R	49	140	TRUE	0	2.08
	CD06	Caspase	M	R	49	141	FALSE	3.366	4.72
	CD06	Caspase	M	R	49	142	FALSE	4.832	5.334
	CD06	Caspase	M	R	49	143	FALSE	14.84	15.996
	CD06	Caspase	M	R	49	144	FALSE	29.957	31.272
	CD06	Caspase	M	L	50	145	TRUE	0	1.782
	CD06	Caspase	M	R	51	146	TRUE	0	1.954
	CD06	Caspase	M	L	52	147	TRUE	0	1.252
	CD06	Caspase	M	L	52	148	FALSE	3.635	4.109
	CD06	Caspase	M	L	52	149	FALSE	10.45	11.117
	CD06	Caspase	M	R	53	150	TRUE	0	2.102
	CD06	Caspase	M	R	53	151	FALSE	5.404	6.335
	CD06	Caspase	M	L	54	152	TRUE	0	2.354
	CD06	Caspase	M	R	55	153	TRUE	0	1.952
	CD06	Caspase	M	L	56	154	FALSE	0	0.973
	CD06	Caspase	M	R	57	155	TRUE	0	1.411
	CD06	Caspase	M	L	58	156	TRUE	0	2.053
	CD06	Caspase	M	R	59	157	TRUE	0	2.066
	CD06	Caspase	M	R	59	158	FALSE	7.357	8.393
	CD06	Caspase	M	R	59	159	FALSE	8.813	9.165
	CD06	Caspase	M	L	60	160	TRUE	0	1.586
	CD06	Caspase	M	L	60	161	FALSE	7.06	8.944
	CD06	Caspase	M	R	61	162	TRUE	0	1.663
	CD06	Caspase	M	R	61	163	FALSE	29.243	30.63
	CD06	Caspase	M	L	62	164	TRUE	0	1.846
	CD06	Caspase	M	L	62	165	FALSE	2.396	2.575
	CD06	Caspase	M	L	62	166	FALSE	7.774	8.841
	CD06	Caspase	M	R	63	167	TRUE	0	0.568
	CD06	Caspase	M	R	63	168	TRUE	0.624	0.854
	CD06	Caspase	M	R	63	169	FALSE	3.322	5.683
	CD06	Caspase	M	R	63	170	FALSE	10.198	10.471
	CD06	Caspase	M	R	63	171	FALSE	16.13	16.904
	CD06	Caspase	M	L	64	172	TRUE	0	1.687
	CD06	Caspase	M	L	64	173	FALSE	9.19	10.18
	CD06	Caspase	M	R	65	174	TRUE	0	1.695
	CD06	Caspase	M	L	66	175	TRUE	0	0.732
	CD06	Caspase	M	R	67	176	TRUE	0	0.791
	CD06	Caspase	M	L	68	177	TRUE	0	1.74
	CD06	Caspase	M	L	68	178	FALSE	16.721	17.658
	CD06	Caspase	M	L	68	179	FALSE	33.688	34.223
	CD06	Caspase	M	R	69	180	TRUE	0	2.273
	CD06	Caspase	M	R	69	181	FALSE	3.883	4.587
	CD06	Caspase	M	L	70	182	TRUE	0	0.104
	CD06	Caspase	M	L	70	183	FALSE	0.324	2.234
	CD06	Caspase	M	L	70	184	FALSE	5.177	5.631
	CD06	Caspase	M	L	70	185	FALSE	9.716	10.159
	CD06	Caspase	M	R	71	186	TRUE	0	2.086
	CD06	Caspase	M	R	71	187	TRUE	13.333	15.612
	CD06	Caspase	M	L	72	188	TRUE	0	2.522
	CD06	Caspase	M	L	72	189	TRUE	10.018	12.52
	CD06	Caspase	M	L	72	190	FALSE	14.716	16.082
	CD06	Caspase	M	R	73	191	TRUE	0	2.855
	CD06	Caspase	M	L	74	192	TRUE	0	2.169
	CD06	Caspase	M	R	75	193	TRUE	0	2.758
	CD06	Caspase	M	L	76	194	FALSE	0	1.293
	CD06	Caspase	M	R	77	195	TRUE	0	2.144
	CD06	Caspase	M	R	77	196	FALSE	3.48	4.311
	CD06	Caspase	M	L	78	197	TRUE	0	2.229
	CD06	Caspase	M	R	79	198	TRUE	0	2.487
	CD06	Caspase	M	L	80	199	TRUE	0	2.225
	CD06	Caspase	M	L	80	200	FALSE	4.095	4.543
	CD06	Caspase	M	R	81	201	TRUE	0	2.151
	CD06	Caspase	M	R	81	202	FALSE	2.313	3.331
	CD06	Caspase	M	R	81	203	FALSE	11.763	12.608
	CD06	Caspase	M	L	82	204	TRUE	0	1.923
	CD06	Caspase	M	L	82	205	FALSE	5.032	5.554
	CD06	Caspase	M	L	82	206	FALSE	10.004	10.538
	CD06	Caspase	M	R	83	207	TRUE	0	1.18
	CD06	Caspase	M	R	83	208	FALSE	1.288	2.135
	CD06	Caspase	M	L	84	209	TRUE	0	1.294
	CD06	Caspase	M	R	85	210	TRUE	0	2.518
	CD06	Caspase	M	R	85	211	FALSE	15.514	16.226
	CD06	Caspase	M	L	86	212	TRUE	0	2.273
	CD06	Caspase	M	R	87	213	TRUE	0	2.095
	CD06	Caspase	M	R	87	214	FALSE	7.868	8.643
	CD06	Caspase	M	L	88	215	TRUE	0	2.506
	CD06	Caspase	M	L	88	216	FALSE	4.203	4.719
	CD06	Caspase	M	R	89	217	TRUE	0	1.529
	CD06	Caspase	M	R	89	218	TRUE	38.631	39.915
	CD06	Caspase	M	L	90	219	FALSE	0	0.785
	CD06	Caspase	M	R	91	220	TRUE	0	2.596
	CD06	Caspase	M	R	91	221	FALSE	4.253	4.904
	CD06	Caspase	M	L	92	222	TRUE	0	1.795
	CD06	Caspase	M	L	92	223	FALSE	3.449	3.702
	CD06	Caspase	M	R	93	224	TRUE	0	2.154
	CD06	Caspase	M	L	94	225	TRUE	0	1.56
	CD06	Caspase	M	R	95	226	TRUE	0	1.534
	CD06	Caspase	M	R	95	227	FALSE	3.335	4.064
	CD06	Caspase	M	R	95	228	FALSE	64.386	65.82
	CD06	Caspase	M	L	96	229	TRUE	0	1.952
	CD06	Caspase	M	L	96	230	FALSE	14.18	15.274
	CD06	Caspase	M	L	96	231	FALSE	19.299	19.638
	CD06	Caspase	M	R	97	232	TRUE	0	1.497
	CD06	Caspase	M	R	97	233	FALSE	25.604	26.826
	CD06	Caspase	M	L	98	234	TRUE	0	1.873
	CD06	Caspase	M	R	99	235	TRUE	0	1.871
	CD06	Caspase	M	R	99	236	FALSE	4.286	4.511
	CD06	Caspase	M	L	100	237	TRUE	0	1.942
	CD06	Caspase	M	L	100	238	FALSE	9.767	10.293
	CD06	Caspase	M	R	101	239	TRUE	0	2.28
	CD06	Caspase	M	R	101	240	FALSE	11.791	12.717
	CD06	Caspase	M	R	101	241	FALSE	15.185	15.613
	CD06	Caspase	M	R	101	242	FALSE	24.03	24.42
	CD06	Caspase	M	L	102	243	TRUE	0	1.68
	CD06	Caspase	M	L	102	244	FALSE	8.368	8.802
	CD06	Caspase	M	L	102	245	FALSE	9.065	9.705
	CD06	Caspase	M	L	102	246	FALSE	9.82	10.008
	CD06	Caspase	M	L	102	247	FALSE	10.405	11.188
	CD06	Caspase	M	L	102	248	FALSE	16.962	17.433
	CD06	Caspase	M	L	102	249	FALSE	23.133	23.403
	CD06	Caspase	M	L	102	250	FALSE	39.892	40.023
	CD06	Caspase	M	L	102	251	FALSE	40.116	40.812
	CD06	Caspase	M	L	102	252	FALSE	41.001	41.437
	CD06	Caspase	M	R	103	253	TRUE	0	1.87
	CD06	Caspase	M	L	104	254	TRUE	0	1.381
	CD06	Caspase	M	R	105	255	TRUE	0	1.398
	CD06	Caspase	M	R	105	256	FALSE	2.198	2.415
	CD06	Caspase	M	L	106	257	TRUE	0	1.903
	CD06	Caspase	M	L	106	258	FALSE	20.577	21.805
	CD06	Caspase	M	L	106	259	FALSE	42.795	43.133
	CD06	Caspase	M	R	107	260	TRUE	0	2.51
	CD06	Caspase	M	R	107	261	FALSE	5.346	5.674
	CD06	Caspase	M	L	108	262	TRUE	0	1.122
	CD06	Caspase	M	L	108	263	FALSE	6.691	7.019
	CD06	Caspase	M	L	108	264	FALSE	47.143	47.612
	CD06	Caspase	M	L	108	265	FALSE	61.798	62.269
	CD06	Caspase	M	R	109	266	TRUE	0	2.023
	CD06	Caspase	M	L	110	267	TRUE	0	0.211
	CD06	Caspase	M	R	111	268	TRUE	0	2.046
	CD06	Caspase	M	L	112	269	TRUE	0	2.247
	CD06	Caspase	M	L	112	270	TRUE	8.751	9.069
	CD06	Caspase	M	R	113	271	TRUE	0	1.945
	CD06	Caspase	M	L	114	272	FALSE	0	1.779
	CD06	Caspase	M	L	114	273	FALSE	3.4	4.235
	CD06	Caspase	M	R	115	274	TRUE	0	1.478
	CD06	Caspase	M	R	115	275	FALSE	1.525	2.338
	CD06	Caspase	M	R	115	276	FALSE	5.343	6.166
	CD06	Caspase	M	R	115	277	FALSE	10.736	11.568
	CD06	Caspase	M	L	116	278	TRUE	0	1.702
	CD06	Caspase	M	R	117	279	TRUE	0	1.728
	CD06	Caspase	M	R	117	280	FALSE	5.787	6.233
	CD06	Caspase	M	R	117	281	FALSE	6.276	6.411
	CD06	Caspase	M	L	118	282	TRUE	0	0.822
	CD06	Caspase	M	L	118	283	FALSE	18.622	18.827
	CD06	Caspase	M	L	118	284	FALSE	18.956	19.589
	CD06	Caspase	M	L	118	285	FALSE	20.011	20.572
	CD06	Caspase	M	L	118	286	FALSE	31.257	31.363
	CD06	Caspase	M	L	118	287	FALSE	32.097	33.358
	CD06	Caspase	M	R	119	288	TRUE	0	2.354
	CD06	Caspase	M	L	120	289	TRUE	0	2.31
	CD06	Caspase	M	R	121	290	TRUE	0	2.073
	CD06	Caspase	M	R	121	291	FALSE	2.171	2.474
	CD06	Caspase	M	R	121	292	FALSE	8.454	9.311
	CD06	Caspase	M	L	122	293	TRUE	0	0.452
	CD06	Caspase	M	L	122	294	TRUE	11.975	13.653
	CD06	Caspase	M	L	122	295	FALSE	22.906	23.428
	CD06	Caspase	M	R	123	296	TRUE	0	2.025
	CD06	Caspase	M	R	123	297	FALSE	54.252	55.114
	CD06	Caspase	M	L	124	298	TRUE	0	0.381
	CD06	Caspase	M	R	125	299	TRUE	0	1.476
	CD06	Caspase	M	L	126	300	TRUE	0	2.835
	CD06	Caspase	M	L	126	301	FALSE	4.314	4.561
	CD06	Caspase	M	L	126	302	FALSE	20.245	20.567
	CD06	Caspase	M	L	126	303	FALSE	20.73	21.298
	CD06	Caspase	M	R	127	304	TRUE	0	1.958
	CD06	Caspase	M	L	128	305	TRUE	0	1.415
	CD06	Caspase	M	L	128	306	FALSE	2.004	2.287
	CD06	Caspase	M	L	128	307	FALSE	7.761	8.523
	CD06	Caspase	M	L	128	308	FALSE	27.789	28.654
	CD06	Caspase	M	L	128	309	FALSE	53.821	54.177
	CD06	Caspase	M	R	129	310	TRUE	0	2.12
	CD06	Caspase	M	R	129	311	FALSE	3.408	3.874
	CD06	Caspase	M	L	130	312	TRUE	0	1.932
	CD06	Caspase	M	R	131	313	TRUE	0	0.343
	CD06	Caspase	M	R	131	314	TRUE	14.119	16.315
	CD06	Caspase	M	L	132	315	TRUE	0	0.199
	CD06	Caspase	M	L	132	316	FALSE	23.226	24.636
	CD06	Caspase	M	L	132	317	FALSE	25.459	25.96
	CD06	Caspase	M	R	133	318	TRUE	0	1.027
	CD06	Caspase	M	R	133	319	FALSE	11.375	11.54
	CD06	Caspase	M	L	134	320	TRUE	0	1.888
	CD06	Caspase	M	R	135	321	FALSE	0	0.747
	CD06	Caspase	M	L	136	322	TRUE	0	0.943
	CD06	Caspase	M	L	136	323	FALSE	38.975	39.521
	CD06	Caspase	M	R	137	324	TRUE	0	0.113
	CD06	Caspase	M	L	138	325	TRUE	0	0.142
	CD06	Caspase	M	L	138	326	FALSE	1.521	1.921
	CD06	Caspase	M	L	138	327	FALSE	3.083	5.554
	CD06	Caspase	M	L	138	328	FALSE	7.983	8.231
	CD06	Caspase	M	L	138	329	FALSE	8.366	9.042
	CD06	Caspase	M	R	139	330	TRUE	0	2.197
	CD06	Caspase	M	L	140	331	TRUE	0	1.279
	CD06	Caspase	M	R	141	332	TRUE	0	1.828
	CD06	Caspase	M	R	141	333	FALSE	4.536	4.698
	CD06	Caspase	M	R	141	334	FALSE	19.254	20.501
	CD06	Caspase	M	L	142	335	TRUE	0	2.191
	CD06	Caspase	M	L	142	336	FALSE	2.288	2.871
	CD06	Caspase	M	L	142	337	FALSE	119.872	121.023
	CD06	Caspase	M	L	142	338	FALSE	126.799	127.012
	CD06	Caspase	M	L	142	339	FALSE	141.558	142.402
	CD10	Caspase	M	R	1	1	FALSE	0	0.463
	CD10	Caspase	M	L	2	2	TRUE	0	0.582
	CD10	Caspase	M	L	2	3	FALSE	0.65	1.162
	CD10	Caspase	M	L	2	4	FALSE	1.31	7.472
	CD10	Caspase	M	L	2	5	FALSE	11.426	14.638
	CD10	Caspase	M	L	2	6	FALSE	14.854	15.073
	CD10	Caspase	M	R	3	7	TRUE	0	4.007
	CD10	Caspase	M	R	3	8	FALSE	4.203	4.76
	CD10	Caspase	M	R	3	9	FALSE	7.053	7.618
	CD10	Caspase	M	R	3	10	FALSE	7.887	8.004
	CD10	Caspase	M	R	3	11	FALSE	12.572	15.487
	CD10	Caspase	M	R	3	12	FALSE	26.5	27.605
	CD10	Caspase	M	R	3	13	FALSE	27.937	28.061
	CD10	Caspase	M	L	4	14	TRUE	0	1.71
	CD10	Caspase	M	L	4	15	FALSE	1.975	2.807
	CD10	Caspase	M	L	4	16	FALSE	3.794	5.512
	CD10	Caspase	M	R	5	17	TRUE	0	1.014
	CD10	Caspase	M	L	6	18	TRUE	0	1.215
	CD10	Caspase	M	L	6	19	FALSE	2.195	2.636
	CD10	Caspase	M	L	6	20	FALSE	17.273	18.115
	CD10	Caspase	M	R	7	21	TRUE	0	1.837
	CD10	Caspase	M	R	7	22	FALSE	2.207	2.39
	CD10	Caspase	M	L	8	23	TRUE	0	1.745
	CD10	Caspase	M	L	8	24	FALSE	3.065	3.857
	CD10	Caspase	M	R	9	25	TRUE	0	0.947
	CD10	Caspase	M	R	9	26	FALSE	0.972	1.262
	CD10	Caspase	M	L	10	27	TRUE	0	1.872
	CD10	Caspase	M	R	11	28	FALSE	0	2.628
	CD10	Caspase	M	R	11	29	FALSE	4.609	5.26
	CD10	Caspase	M	L	12	30	TRUE	0	1.205
	CD10	Caspase	M	L	12	31	FALSE	6.29	7.834
	CD10	Caspase	M	L	12	32	FALSE	9.199	9.624
	CD10	Caspase	M	L	12	33	FALSE	9.975	10.589
	CD10	Caspase	M	R	13	34	TRUE	0	1.785
	CD10	Caspase	M	R	13	35	FALSE	8.186	9.248
	CD10	Caspase	M	L	14	36	TRUE	0	1.564
	CD10	Caspase	M	L	14	37	FALSE	7.511	9.268
	CD10	Caspase	M	L	14	38	FALSE	9.292	9.44
	CD10	Caspase	M	L	14	39	FALSE	9.467	9.967
	CD10	Caspase	M	L	14	40	FALSE	10.138	10.431
	CD10	Caspase	M	L	14	41	FALSE	10.559	11.093
	CD10	Caspase	M	L	14	42	FALSE	13.378	14.303
	CD10	Caspase	M	L	14	43	FALSE	14.908	15.63
	CD10	Caspase	M	R	15	44	TRUE	0	1.726
	CD10	Caspase	M	L	16	45	TRUE	0	0.201
	CD10	Caspase	M	L	16	46	FALSE	0.461	0.991
	CD10	Caspase	M	L	16	47	FALSE	1.861	2.079
	CD10	Caspase	M	L	16	48	FALSE	2.246	2.567
	CD10	Caspase	M	L	16	49	FALSE	2.61	2.801
	CD10	Caspase	M	L	16	50	FALSE	2.965	3.469
	CD10	Caspase	M	L	16	51	FALSE	3.499	3.613
	CD10	Caspase	M	L	16	52	FALSE	3.819	4.079
	CD10	Caspase	M	L	16	53	FALSE	7.809	8.21
	CD10	Caspase	M	L	16	54	FALSE	8.611	8.77
	CD10	Caspase	M	L	16	55	FALSE	8.914	9.222
	CD10	Caspase	M	L	16	56	FALSE	23.156	23.602
	CD10	Caspase	M	L	16	57	FALSE	23.945	24.328
	CD10	Caspase	M	L	16	58	FALSE	24.54	25.272
	CD10	Caspase	M	R	17	59	TRUE	0	2.209
	CD10	Caspase	M	R	17	60	FALSE	3.658	5.148
	CD10	Caspase	M	R	17	61	FALSE	36.826	37.12
	CD10	Caspase	M	R	17	62	FALSE	70.236	70.749
	CD10	Caspase	M	L	18	63	TRUE	0	0.452
	CD10	Caspase	M	L	18	64	FALSE	0.614	2.381
	CD10	Caspase	M	L	18	65	FALSE	5.457	5.881
	CD10	Caspase	M	L	18	66	FALSE	6.138	6.327
	CD10	Caspase	M	L	18	67	FALSE	6.447	7.85
	CD10	Caspase	M	L	18	68	FALSE	8.096	8.585
	CD10	Caspase	M	L	18	69	FALSE	9.871	10.351
	CD10	Caspase	M	L	18	70	FALSE	10.513	11.657
	CD10	Caspase	M	L	18	71	FALSE	22.283	23.275
	CD10	Caspase	M	L	18	72	FALSE	23.831	23.989
	CD10	Caspase	M	L	18	73	FALSE	24.973	25.348
	CD10	Caspase	M	L	18	74	FALSE	25.473	26.136
	CD10	Caspase	M	L	18	75	FALSE	75.973	77.115
	CD10	Caspase	M	R	19	76	TRUE	0	2.118
	CD10	Caspase	M	L	20	77	TRUE	0	1.991
	CD10	Caspase	M	L	20	78	FALSE	2.266	2.517
	CD10	Caspase	M	L	20	79	FALSE	2.62	3.226
	CD10	Caspase	M	L	20	80	FALSE	5.32	5.611
	CD10	Caspase	M	L	20	81	FALSE	6.019	6.274
	CD10	Caspase	M	L	20	82	FALSE	6.775	7.667
	CD10	Caspase	M	L	20	83	FALSE	8.298	8.464
	CD10	Caspase	M	L	20	84	FALSE	14.556	15.578
	CD10	Caspase	M	L	20	85	FALSE	19.243	19.602
	CD10	Caspase	M	L	20	86	FALSE	19.958	20.171
	CD10	Caspase	M	L	20	87	FALSE	20.373	20.523
	CD10	Caspase	M	L	20	88	FALSE	20.623	22.318
	CD10	Caspase	M	R	21	89	TRUE	0	2.205
	CD10	Caspase	M	R	21	90	FALSE	3.551	3.984
	CD10	Caspase	M	L	22	91	TRUE	0	0.411
	CD10	Caspase	M	L	22	92	FALSE	0.958	3.133
	CD10	Caspase	M	L	22	93	FALSE	3.811	4.03
	CD10	Caspase	M	L	22	94	FALSE	8.723	9.711
	CD10	Caspase	M	L	22	95	FALSE	12.66	13.024
	CD10	Caspase	M	L	22	96	FALSE	16.955	17.291
	CD10	Caspase	M	L	22	97	FALSE	19.28	19.603
	CD10	Caspase	M	L	22	98	FALSE	20.071	20.277
	CD10	Caspase	M	L	22	99	FALSE	20.375	20.666
	CD10	Caspase	M	L	22	100	FALSE	20.916	21.646
	CD10	Caspase	M	R	23	101	TRUE	0	1.932
	CD10	Caspase	M	R	23	102	FALSE	3.246	3.658
	CD10	Caspase	M	L	24	103	TRUE	0	1.503
	CD10	Caspase	M	L	24	104	FALSE	2.417	2.63
	CD10	Caspase	M	L	24	105	FALSE	6.814	7.153
	CD10	Caspase	M	L	24	106	FALSE	7.401	8.449
	CD10	Caspase	M	L	24	107	FALSE	8.656	9.028
	CD10	Caspase	M	L	24	108	FALSE	9.311	9.439
	CD10	Caspase	M	L	24	109	FALSE	9.524	9.809
	CD10	Caspase	M	R	25	110	TRUE	0	2.015
	CD10	Caspase	M	R	25	111	FALSE	5.767	6.476
	CD10	Caspase	M	R	25	112	FALSE	21.112	23.046
	CD10	Caspase	M	L	26	113	TRUE	0	0.294
	CD10	Caspase	M	L	26	114	FALSE	0.75	1.156
	CD10	Caspase	M	L	26	115	FALSE	3.052	4.616
	CD10	Caspase	M	L	26	116	FALSE	5.029	5.239
	CD10	Caspase	M	L	26	117	FALSE	5.542	5.913
	CD10	Caspase	M	L	26	118	FALSE	6.071	6.402
	CD10	Caspase	M	L	26	119	FALSE	8.068	8.344
	CD10	Caspase	M	L	26	120	FALSE	8.598	9.387
	CD10	Caspase	M	L	26	121	FALSE	9.844	10.647
	CD10	Caspase	M	L	26	122	FALSE	10.897	11.717
	CD10	Caspase	M	L	26	123	FALSE	12.474	12.831
	CD10	Caspase	M	L	26	124	FALSE	18.869	19.266
	CD10	Caspase	M	L	26	125	FALSE	19.812	20.079
	CD10	Caspase	M	L	26	126	FALSE	20.442	20.687
	CD10	Caspase	M	L	26	127	FALSE	21.183	21.533
	CD10	Caspase	M	L	26	128	FALSE	26.666	27.163
	CD10	Caspase	M	L	26	129	FALSE	27.526	27.824
	CD10	Caspase	M	L	26	130	FALSE	28.035	28.226
	CD10	Caspase	M	L	26	131	FALSE	32.684	32.954
	CD10	Caspase	M	L	26	132	FALSE	33.356	33.604
	CD10	Caspase	M	L	26	133	FALSE	34.166	35.865
	CD10	Caspase	M	R	27	134	TRUE	0	1.735
	CD10	Caspase	M	L	28	135	TRUE	0	1.436
	CD10	Caspase	M	L	28	136	FALSE	1.604	1.893
	CD10	Caspase	M	L	28	137	FALSE	18.531	19.463
	CD10	Caspase	M	R	29	138	TRUE	0	0.73
	CD10	Caspase	M	R	29	139	FALSE	1.086	1.951
	CD10	Caspase	M	L	30	140	TRUE	0	2.558
	CD10	Caspase	M	L	30	141	FALSE	2.759	2.892
	CD10	Caspase	M	L	30	142	FALSE	3.218	3.737
	CD10	Caspase	M	L	30	143	FALSE	4.833	5.221
	CD10	Caspase	M	L	30	144	FALSE	5.575	6.315
	CD10	Caspase	M	L	30	145	FALSE	6.544	7.177
	CD10	Caspase	M	L	30	146	FALSE	7.528	8.006
	CD10	Caspase	M	L	30	147	FALSE	8.166	8.587
	CD10	Caspase	M	L	30	148	FALSE	9.719	10.072
	CD10	Caspase	M	L	30	149	FALSE	37.778	38.063
	CD10	Caspase	M	L	30	150	FALSE	38.449	38.813
	CD10	Caspase	M	L	30	151	FALSE	39.048	39.211
	CD10	Caspase	M	L	30	152	FALSE	42.685	43.925
	CD10	Caspase	M	R	31	153	TRUE	0	1.572
	CD10	Caspase	M	L	32	154	TRUE	0	1.619
	CD10	Caspase	M	L	32	155	FALSE	1.853	2.203
	CD10	Caspase	M	L	32	156	FALSE	9.039	9.747
	CD10	Caspase	M	L	32	157	FALSE	9.878	10.369
	CD10	Caspase	M	R	33	158	TRUE	0	1.25
	CD10	Caspase	M	L	34	159	TRUE	0	0.42
	CD10	Caspase	M	L	34	160	FALSE	0.701	3.003
	CD10	Caspase	M	L	34	161	FALSE	4.951	5.376
	CD10	Caspase	M	L	34	162	FALSE	5.578	5.707
	CD10	Caspase	M	L	34	163	FALSE	5.732	6.04
	CD10	Caspase	M	L	34	164	FALSE	6.122	6.326
	CD10	Caspase	M	L	34	165	FALSE	6.341	6.651
	CD10	Caspase	M	L	34	166	FALSE	8.226	8.474
	CD10	Caspase	M	L	34	167	FALSE	8.767	9.206
	CD10	Caspase	M	L	34	168	FALSE	9.237	9.462
	CD10	Caspase	M	L	34	169	FALSE	9.587	9.941
	CD10	Caspase	M	L	34	170	FALSE	12.603	12.962
	CD10	Caspase	M	L	34	171	FALSE	13.355	13.778
	CD10	Caspase	M	L	34	172	FALSE	13.843	14.306
	CD10	Caspase	M	L	34	173	FALSE	16.812	17.175
	CD10	Caspase	M	R	35	174	TRUE	0	1.516
	CD10	Caspase	M	R	35	175	FALSE	2.314	2.615
	CD10	Caspase	M	L	36	176	TRUE	0	1.844
	CD10	Caspase	M	L	36	177	FALSE	2.265	2.577
	CD10	Caspase	M	L	36	178	FALSE	2.704	3.466
	CD10	Caspase	M	L	36	179	FALSE	4.957	6.118
	CD10	Caspase	M	L	36	180	FALSE	6.341	6.777
	CD10	Caspase	M	L	36	181	FALSE	6.857	7.194
	CD10	Caspase	M	L	36	182	FALSE	23.312	23.74
	CD10	Caspase	M	L	36	183	FALSE	23.964	24.319
	CD10	Caspase	M	L	36	184	FALSE	25.026	25.275
	CD10	Caspase	M	L	36	185	FALSE	25.793	26.664
	CD10	Caspase	M	L	36	186	FALSE	26.676	27.019
	CD10	Caspase	M	L	36	187	FALSE	50.896	51.691
	CD10	Caspase	M	L	36	188	FALSE	51.858	52.544
	CD10	Caspase	M	L	36	189	FALSE	52.813	53.101
	CD10	Caspase	M	L	36	190	FALSE	83.398	84.349
	CD10	Caspase	M	R	37	191	TRUE	0	2.482
	CD10	Caspase	M	R	37	192	TRUE	12.211	16.364
	CD10	Caspase	M	R	37	193	FALSE	16.734	17.112
	CD10	Caspase	M	R	37	194	FALSE	20.88	21.067
	CD10	Caspase	M	L	38	195	TRUE	0	1.637
	CD10	Caspase	M	L	38	196	FALSE	1.878	2.197
	CD10	Caspase	M	L	38	197	FALSE	3.403	3.742
	CD10	Caspase	M	R	39	198	TRUE	0	1.127
	CD10	Caspase	M	L	40	199	TRUE	0	0.368
	CD10	Caspase	M	L	40	200	FALSE	0.39	2.793
	CD10	Caspase	M	L	40	201	FALSE	3.169	3.519
	CD10	Caspase	M	L	40	202	FALSE	6.062	7.709
	CD10	Caspase	M	L	40	203	FALSE	7.932	8.31
	CD10	Caspase	M	R	41	204	TRUE	0	1.941
	CD10	Caspase	M	R	41	205	FALSE	16.992	18.497
	CD10	Caspase	M	R	41	206	FALSE	18.844	18.967
	CD10	Caspase	M	R	41	207	FALSE	19.035	19.492
	CD10	Caspase	M	R	41	208	FALSE	19.516	20.183
	CD10	Caspase	M	R	41	209	FALSE	20.443	20.957
	CD10	Caspase	M	R	41	210	FALSE	21.209	22.225
	CD10	Caspase	M	R	41	211	FALSE	22.575	24.136
	CD10	Caspase	M	R	41	212	FALSE	26.756	27.492
	CD10	Caspase	M	L	42	213	TRUE	0	2.924
	CD10	Caspase	M	R	43	214	TRUE	0	2.212
	CD10	Caspase	M	L	44	215	TRUE	0	1.769
	CD10	Caspase	M	L	44	216	FALSE	1.779	2.459
	CD10	Caspase	M	L	44	217	FALSE	3.448	3.792
	CD10	Caspase	M	L	44	218	FALSE	5.317	5.801
	CD10	Caspase	M	R	45	219	TRUE	0	2.303
	CD10	Caspase	M	R	45	220	FALSE	4.357	5.761
	CD10	Caspase	M	R	45	221	FALSE	6.636	7.13
	CD10	Caspase	M	R	45	222	FALSE	8.016	8.473
	CD10	Caspase	M	L	46	223	TRUE	0	1.453
	CD10	Caspase	M	L	46	224	FALSE	1.512	1.94
	CD10	Caspase	M	L	46	225	FALSE	5.079	5.685
	CD10	Caspase	M	L	46	226	FALSE	17.822	18.169
	CD10	Caspase	M	L	46	227	FALSE	18.472	19.028
	CD10	Caspase	M	L	46	228	FALSE	19.485	20.554
	CD10	Caspase	M	L	46	229	FALSE	61.03	62.595
	CD10	Caspase	M	L	46	230	FALSE	64.789	65.15
	CD10	Caspase	M	R	47	231	TRUE	0	0.245
	CD10	Caspase	M	R	47	232	FALSE	0.593	3.323
	CD10	Caspase	M	R	47	233	FALSE	4.159	4.831
	CD10	Caspase	M	L	48	234	TRUE	0	2.026
	CD10	Caspase	M	L	48	235	FALSE	23.547	24.78
	CD10	Caspase	M	L	48	236	FALSE	29.163	29.671
	CD10	Caspase	M	L	48	237	FALSE	59.781	60.542
	CD10	Caspase	M	L	48	238	FALSE	60.582	60.85
	CD10	Caspase	M	L	48	239	FALSE	61.007	61.503
	CD10	Caspase	M	L	48	240	FALSE	62.853	62.996
	CD10	Caspase	M	L	48	241	FALSE	96.254	100.787
	CD10	Caspase	M	L	48	242	FALSE	102.349	103.937
	CD10	Caspase	M	L	48	243	FALSE	105.273	105.63
	CD10	Caspase	M	L	48	244	FALSE	107.725	108.415
	CD10	Caspase	M	R	49	245	TRUE	0	2.219
	CD10	Caspase	M	L	50	246	TRUE	0	2.701
	CD10	Caspase	M	L	50	247	FALSE	16.276	16.796
	CD10	Caspase	M	L	50	248	FALSE	22.135	23.048
	CD10	Caspase	M	L	50	249	FALSE	23.111	23.469
	CD10	Caspase	M	R	51	250	TRUE	0	1.516
	CD10	Caspase	M	R	51	251	TRUE	2.132	3.309
	CD10	Caspase	M	R	51	252	FALSE	3.785	4.084
	CD10	Caspase	M	R	51	253	FALSE	4.379	7.233
	CD10	Caspase	M	L	52	254	TRUE	0	1.225
	CD10	Caspase	M	L	52	255	FALSE	1.463	1.717
	CD10	Caspase	M	L	52	256	FALSE	6.154	7.164
	CD10	Caspase	M	L	52	257	FALSE	12.353	13.324
	CD10	Caspase	M	R	53	258	TRUE	0	2.388
	CD10	Caspase	M	R	53	259	FALSE	4.208	5.757
	CD10	Caspase	M	R	53	260	FALSE	5.813	6.202
	CD10	Caspase	M	R	53	261	FALSE	8.298	9.216
	CD10	Caspase	M	R	53	262	FALSE	26.901	27.698
	CD10	Caspase	M	L	54	263	TRUE	0	1.61
	CD10	Caspase	M	R	55	264	TRUE	0	1.653
	CD10	Caspase	M	L	56	265	TRUE	0	2.611
	CD10	Caspase	M	L	56	266	FALSE	4.297	5.21
	CD10	Caspase	M	L	56	267	FALSE	6.385	6.693
	CD10	Caspase	M	R	57	268	TRUE	0	2.675
	CD10	Caspase	M	R	57	269	FALSE	2.877	3.767
	CD10	Caspase	M	R	57	270	FALSE	10.587	11.79
	CD10	Caspase	M	L	58	271	TRUE	0	2.178
	CD10	Caspase	M	L	58	272	TRUE	2.413	3.959
	CD10	Caspase	M	L	58	273	FALSE	4.078	5.451
	CD10	Caspase	M	L	58	274	FALSE	6.328	6.931
	CD10	Caspase	M	L	58	275	FALSE	8.223	9.399
	CD10	Caspase	M	L	58	276	FALSE	10.92	11.228
	CD10	Caspase	M	L	58	277	FALSE	11.586	12.462
	CD10	Caspase	M	L	58	278	FALSE	12.682	13.182
	CD10	Caspase	M	L	58	279	FALSE	13.277	13.585
	CD10	Caspase	M	L	58	280	FALSE	16.084	16.552
	CD10	Caspase	M	R	59	281	TRUE	0	2.526
	CD10	Caspase	M	R	59	282	FALSE	2.777	3.302
	CD10	Caspase	M	L	60	283	TRUE	0	2.299
	CD10	Caspase	M	R	61	284	TRUE	0	3.636
	CD10	Caspase	M	R	61	285	FALSE	6.787	8.145
	CD10	Caspase	M	R	61	286	FALSE	9.167	9.981
	CD10	Caspase	M	L	62	287	TRUE	0	2.665
	CD10	Caspase	M	L	62	288	FALSE	3.512	3.851
	CD10	Caspase	M	L	62	289	FALSE	5.607	6.796
	CD10	Caspase	M	L	62	290	FALSE	10.576	11.928
	CD10	Caspase	M	R	63	291	TRUE	0	1.764
	CD10	Caspase	M	L	64	292	TRUE	0	3.569
	CD10	Caspase	M	L	64	293	FALSE	10.698	11.984
	CD10	Caspase	M	R	65	294	TRUE	0	2.414
	CD10	Caspase	M	L	66	295	TRUE	0	1.852
	CD10	Caspase	M	L	66	296	FALSE	1.952	2.298
	CD10	Caspase	M	L	66	297	FALSE	5.248	7.296
	CD10	Caspase	M	R	67	298	TRUE	0	2.944
	CD10	Caspase	M	R	67	299	FALSE	5.518	6.397
	CD10	Caspase	M	L	68	300	TRUE	0	2.29
	CD10	Caspase	M	L	68	301	FALSE	3.034	3.483
	CD10	Caspase	M	L	68	302	FALSE	14.417	16.635
	CD10	Caspase	M	L	68	303	FALSE	17	17.397
	CD10	Caspase	M	L	68	304	FALSE	18.35	19.524
	CD10	Caspase	M	L	68	305	FALSE	20.473	20.807
	CD10	Caspase	M	L	68	306	FALSE	22.512	22.983
	CD10	Caspase	M	L	68	307	FALSE	27.625	28.267
	CD10	Caspase	M	L	68	308	FALSE	28.303	28.624
	CD10	Caspase	M	L	68	309	FALSE	37.896	38.869
	CD10	Caspase	M	R	69	310	TRUE	0	2.979
	CD10	Caspase	M	R	69	311	FALSE	3.704	3.99
	CD10	Caspase	M	R	69	312	FALSE	16.588	17.196
	CD10	Caspase	M	R	69	313	FALSE	17.287	17.465
	CD10	Caspase	M	L	70	314	TRUE	0	1.75
	CD10	Caspase	M	R	71	315	TRUE	0	2.246
	CD10	Caspase	M	L	72	316	TRUE	0	2.432
	CD10	Caspase	M	R	73	317	FALSE	0	1.236
	CD10	Caspase	M	L	74	318	TRUE	0	2.112
	CD10	Caspase	M	R	75	319	TRUE	0	1.257
	CD10	Caspase	M	L	76	320	FALSE	0	0.899
	CD10	Caspase	M	L	76	321	FALSE	4.236	5.152
	CD10	Caspase	M	R	77	322	TRUE	0	4.272
	CD10	Caspase	M	L	78	323	TRUE	0	2.016
	CD10	Caspase	M	L	78	324	FALSE	2.673	3.262
	CD10	Caspase	M	L	78	325	FALSE	20.014	21.241
	CD10	Caspase	M	L	78	326	FALSE	41.3	42.79
	CD10	Caspase	M	L	78	327	FALSE	44.487	45.062
	CD10	Caspase	M	L	78	328	FALSE	54.298	55.191
	CD10	Caspase	M	R	79	329	TRUE	0	1.884
	CD10	Caspase	M	L	80	330	TRUE	0	1.63
	CD10	Caspase	M	L	80	331	TRUE	4.442	6.56
	CD10	Caspase	M	R	81	332	TRUE	0	3.446
	CD10	Caspase	M	R	81	333	FALSE	3.662	3.957
	CD10	Caspase	M	R	81	334	FALSE	9.102	9.445
	CD10	Caspase	M	L	82	335	TRUE	0	0.857
	CD10	Caspase	M	L	82	336	TRUE	0.9	4.202
	CD10	Caspase	M	L	82	337	FALSE	4.274	5.102
	CD10	Caspase	M	L	82	338	FALSE	5.296	5.584
	CD10	Caspase	M	L	82	339	FALSE	13.071	14.138
	CD10	Caspase	M	L	82	340	FALSE	14.527	14.804
	CD10	Caspase	M	L	82	341	FALSE	19.241	19.566
	CD10	Caspase	M	L	82	342	FALSE	19.635	19.885
	CD10	Caspase	M	L	82	343	FALSE	20.066	20.566
	CD10	Caspase	M	L	82	344	FALSE	20.795	21.204
	CD10	Caspase	M	L	82	345	FALSE	21.216	21.658
	CD10	Caspase	M	L	82	346	FALSE	43.153	44.769
	CD10	Caspase	M	L	82	347	FALSE	44.804	45.05
	CD10	Caspase	M	L	82	348	FALSE	50.442	51.102
	CD10	Caspase	M	L	82	349	FALSE	51.18	51.572
	CD10	Caspase	M	R	83	350	TRUE	0	2.345
	CD10	Caspase	M	R	83	351	FALSE	2.439	2.75
	CD10	Caspase	M	L	84	352	TRUE	0	2.006
	CD10	Caspase	M	R	85	353	TRUE	0	1.263
	CD10	Caspase	M	L	86	354	TRUE	0	2.522
	CD10	Caspase	M	L	86	355	FALSE	11.6	11.971
	CD10	Caspase	M	L	86	356	FALSE	19.973	20.9
	CD10	Caspase	M	R	87	357	TRUE	0	2.337
	CD10	Caspase	M	R	87	358	FALSE	5.545	6.063
	CD10	Caspase	M	R	87	359	FALSE	19.541	21.34
	CD10	Caspase	M	L	88	360	TRUE	0	3.219
	CD10	Caspase	M	R	89	361	TRUE	0	3.103
	CD10	Caspase	M	R	89	362	FALSE	52.259	53.939
	CD10	Caspase	M	R	89	363	FALSE	73.348	74.354
	CD10	Caspase	M	R	89	364	FALSE	99.729	100.39
	CD10	Caspase	M	L	90	365	TRUE	0	1.899
	CD10	Caspase	M	L	90	366	FALSE	2.052	2.294
	CD10	Caspase	M	L	90	367	FALSE	4.887	5.938
	CD10	Caspase	M	L	90	368	FALSE	6.147	6.611
	CD10	Caspase	M	L	90	369	FALSE	6.8	7.185
	CD10	Caspase	M	L	90	370	FALSE	8.521	8.934
	CD10	Caspase	M	L	90	371	FALSE	9.151	9.397
	CD10	Caspase	M	L	90	372	FALSE	12.512	13.167
	CD10	Caspase	M	R	91	373	TRUE	0	2.312
	CD10	Caspase	M	R	91	374	FALSE	2.731	4.08
	CD10	Caspase	M	L	92	375	TRUE	0	1.944
	CD10	Caspase	M	L	92	376	TRUE	3.38	7.406
	CD10	Caspase	M	R	93	377	TRUE	0	2.026
	CD10	Caspase	M	R	93	378	FALSE	3.511	4.025
	CD10	Caspase	M	L	94	379	TRUE	0	2.227
	CD10	Caspase	M	L	94	380	FALSE	2.447	4.942
	CD10	Caspase	M	L	94	381	FALSE	7.111	8.401
	CD10	Caspase	M	L	94	382	FALSE	8.658	8.849
	CD10	Caspase	M	R	95	383	TRUE	0	3.061
	CD10	Caspase	M	R	95	384	FALSE	6.356	7.302
	CD10	Caspase	M	L	96	385	TRUE	0	2.515
	CD10	Caspase	M	L	96	386	FALSE	2.704	3.718
	CD10	Caspase	M	L	96	387	FALSE	4.935	5.764
	CD10	Caspase	M	L	96	388	FALSE	7.315	8.531
	CD10	Caspase	M	R	97	389	TRUE	0	2.959
	CD10	Caspase	M	R	97	390	FALSE	7.516	8.244
	CD10	Caspase	M	L	98	391	TRUE	0	2.113
	CD10	Caspase	M	L	98	392	FALSE	35.157	36.82
	CD10	Caspase	M	R	99	393	TRUE	0	2.507
	CD10	Caspase	M	R	99	394	FALSE	6.657	7.053
	CD10	Caspase	M	R	99	395	FALSE	19.894	21.487
	CD10	Caspase	M	L	100	396	TRUE	0	1.894
	CD10	Caspase	M	R	101	397	TRUE	0	0.487
	CD10	Caspase	M	L	102	398	TRUE	0	1.634
	CD10	Caspase	M	L	102	399	TRUE	15.786	19.248
	CD10	Caspase	M	L	102	400	FALSE	21.602	22.495
	CD10	Caspase	M	R	103	401	TRUE	0	2.506
	CD10	Caspase	M	L	104	402	TRUE	0	1.175
	CD10	Caspase	M	R	105	403	TRUE	0	0.562
	CD10	Caspase	M	L	106	404	TRUE	0	1.562
	CD10	Caspase	M	R	107	405	TRUE	0	2.049
	CD10	Caspase	M	L	108	406	TRUE	0	1.656
	CD10	Caspase	M	L	108	407	FALSE	12.553	13.687
	CD10	Caspase	M	R	109	408	TRUE	0	2.439
	CD10	Caspase	M	L	110	409	TRUE	0	2.181
	CD10	Caspase	M	R	111	410	TRUE	0	2.129
	CD10	Caspase	M	R	111	411	FALSE	7.011	7.663
	CD10	Caspase	M	L	112	412	TRUE	0	2.419
	CD10	Caspase	M	L	112	413	FALSE	3.249	4.07
	CD10	Caspase	M	L	112	414	FALSE	5.269	6.544
	CD10	Caspase	M	R	113	415	TRUE	0	1.997
	CD10	Caspase	M	R	113	416	FALSE	3.811	4.942
	CD10	Caspase	M	R	113	417	FALSE	18.402	19.61
	CD10	Caspase	M	R	113	418	FALSE	64.553	65.193
	CD10	Caspase	M	L	114	419	TRUE	0	1.955
	CD10	Caspase	M	L	114	420	FALSE	23.509	24.472
	CD10	Caspase	M	R	115	421	TRUE	0	2.432
	CD10	Caspase	M	R	115	422	FALSE	39.799	40.922
	CD10	Caspase	M	L	116	423	TRUE	0	1.038
	CD10	Caspase	M	R	117	424	TRUE	0	2.21
	CD10	Caspase	M	L	118	425	TRUE	0	1.941
	CD10	Caspase	M	R	119	426	TRUE	0	2.831
	CD10	Caspase	M	R	119	427	TRUE	15.073	17.567
	CD10	Caspase	M	R	119	428	FALSE	20.26	20.854
	CD10	Caspase	M	L	120	429	TRUE	0	1.737
	CD10	Caspase	M	R	121	430	TRUE	0	1.229
	CD10	Caspase	M	R	121	431	FALSE	1.26	1.63
	CD10	Caspase	M	R	121	432	FALSE	14.328	15.128
	CD10	Caspase	M	L	122	433	TRUE	0	3.22
	CD10	Caspase	M	L	122	434	FALSE	3.652	4.555
	CD10	Caspase	M	L	122	435	FALSE	6.689	7.832
	CD10	Caspase	M	L	122	436	FALSE	10.163	11.126
	CD10	Caspase	M	L	122	437	FALSE	16.228	16.743
	CD11	Caspase	F	L	1	1	FALSE	0	0.398
	CD11	Caspase	F	R	2	2	TRUE	0	0.255
	CD11	Caspase	F	R	2	3	FALSE	0.588	3.28
	CD11	Caspase	F	R	2	4	FALSE	3.325	3.43
	CD11	Caspase	F	R	2	5	FALSE	3.542	4.024
	CD11	Caspase	F	R	2	6	FALSE	4.036	5.253
	CD11	Caspase	F	L	3	7	TRUE	0	1.238
	CD11	Caspase	F	L	3	8	FALSE	42.017	42.684
	CD11	Caspase	F	L	3	9	FALSE	52.239	52.412
	CD11	Caspase	F	L	3	10	FALSE	83.395	84.489
	CD11	Caspase	F	L	3	11	FALSE	97.732	99.184
	CD11	Caspase	F	L	3	12	FALSE	99.203	99.351
	CD11	Caspase	F	R	4	13	TRUE	0	6.68
	CD11	Caspase	F	R	4	14	FALSE	6.759	8.326
	CD11	Caspase	F	R	4	15	FALSE	8.804	11.58
	CD11	Caspase	F	L	5	16	TRUE	0	1.989
	CD11	Caspase	F	L	5	17	FALSE	5.566	6.113
	CD11	Caspase	F	L	5	18	FALSE	6.136	6.28
	CD11	Caspase	F	L	5	19	FALSE	10.541	10.75
	CD11	Caspase	F	L	5	20	FALSE	16.991	17.319
	CD11	Caspase	F	L	5	21	FALSE	17.342	17.449
	CD11	Caspase	F	L	5	22	FALSE	40.615	41.649
	CD11	Caspase	F	L	5	23	FALSE	52.222	55.078
	CD11	Caspase	F	R	6	24	TRUE	0	6.521
	CD11	Caspase	F	L	7	25	TRUE	0	1.54
	CD11	Caspase	F	R	8	26	TRUE	0	3.62
	CD11	Caspase	F	R	8	27	FALSE	4.692	5.763
	CD11	Caspase	F	L	9	28	TRUE	0	1.61
	CD11	Caspase	F	L	9	29	FALSE	26.247	27.158
	CD11	Caspase	F	L	9	30	FALSE	81.208	81.766
	CD11	Caspase	F	L	9	31	FALSE	124.468	124.735
	CD11	Caspase	F	L	9	32	FALSE	124.794	127.38
	CD11	Caspase	F	L	9	33	FALSE	128.317	128.587
	CD11	Caspase	F	R	10	34	TRUE	0	3.211
	CD11	Caspase	F	R	10	35	FALSE	3.679	4.048
	CD11	Caspase	F	L	11	36	TRUE	0	1.85
	CD11	Caspase	F	L	11	37	FALSE	2.226	3.408
	CD11	Caspase	F	L	11	38	FALSE	4.255	5.172
	CD11	Caspase	F	L	11	39	FALSE	12.147	12.561
	CD11	Caspase	F	L	11	40	FALSE	12.655	13.577
	CD11	Caspase	F	L	11	41	FALSE	25.088	25.631
	CD11	Caspase	F	L	11	42	FALSE	29.697	30.346
	CD11	Caspase	F	R	12	43	TRUE	0	3.712
	CD11	Caspase	F	R	12	44	FALSE	9.205	10.713
	CD11	Caspase	F	L	13	45	TRUE	0	2.619
	CD11	Caspase	F	R	14	46	TRUE	0	2.01
	CD11	Caspase	F	L	15	47	TRUE	0	0.194
	CD11	Caspase	F	R	16	48	TRUE	0	2.156
	CD11	Caspase	F	R	16	49	FALSE	2.568	2.984
	CD11	Caspase	F	L	17	50	TRUE	0	0.262
	CD11	Caspase	F	L	17	51	FALSE	22.085	22.199
	CD11	Caspase	F	L	17	52	FALSE	36.549	37.075
	CD11	Caspase	F	R	18	53	TRUE	0	3.329
	CD11	Caspase	F	R	18	54	FALSE	5.128	5.778
	CD11	Caspase	F	R	18	55	FALSE	37.54	39.537
	CD11	Caspase	F	R	18	56	FALSE	39.978	40.259
	CD11	Caspase	F	L	19	57	TRUE	0	0.203
	CD11	Caspase	F	L	19	58	TRUE	5.883	8.778
	CD11	Caspase	F	L	19	59	FALSE	9.194	9.373
	CD11	Caspase	F	L	19	60	FALSE	12.505	13.888
	CD11	Caspase	F	R	20	61	TRUE	0	3.596
	CD11	Caspase	F	R	20	62	FALSE	26.118	27.305
	CD11	Caspase	F	L	21	63	TRUE	0	3.928
	CD11	Caspase	F	L	21	64	FALSE	4.129	5.125
	CD11	Caspase	F	R	22	65	TRUE	0	3.097
	CD11	Caspase	F	R	22	66	FALSE	6.797	7.694
	CD11	Caspase	F	R	22	67	FALSE	30.216	30.897
	CD11	Caspase	F	L	23	68	TRUE	0	0.116
	CD11	Caspase	F	L	23	69	FALSE	0.175	3.105
	CD11	Caspase	F	L	23	70	FALSE	4.504	5.359
	CD11	Caspase	F	R	24	71	TRUE	0	1.751
	CD11	Caspase	F	L	25	72	TRUE	0	3.98
	CD11	Caspase	F	L	25	73	FALSE	4.17	4.529
	CD11	Caspase	F	R	26	74	TRUE	0	2.529
	CD11	Caspase	F	R	26	75	FALSE	6.168	7.246
	CD11	Caspase	F	R	26	76	FALSE	44.632	46.16
	CD11	Caspase	F	L	27	77	TRUE	0	0.226
	CD11	Caspase	F	L	27	78	FALSE	0.329	2.418
	CD11	Caspase	F	L	27	79	FALSE	26.097	28.585
	CD11	Caspase	F	L	27	80	FALSE	31.937	32.297
	CD11	Caspase	F	L	27	81	FALSE	32.513	33.464
	CD11	Caspase	F	L	27	82	FALSE	60.473	61.909
	CD11	Caspase	F	L	27	83	FALSE	61.916	62.304
	CD11	Caspase	F	L	27	84	FALSE	64.663	65.948
	CD11	Caspase	F	R	28	85	TRUE	0	3.095
	CD11	Caspase	F	R	28	86	FALSE	54.374	56.123
	CD11	Caspase	F	L	29	87	TRUE	0	2.369
	CD11	Caspase	F	L	29	88	FALSE	5.359	6.502
	CD11	Caspase	F	L	29	89	FALSE	10.369	11.312
	CD11	Caspase	F	L	29	90	FALSE	29.344	31.059
	CD11	Caspase	F	L	29	91	FALSE	114.106	114.292
	CD11	Caspase	F	L	29	92	FALSE	148.731	150.271
	CD11	Caspase	F	L	29	93	FALSE	165.93	166.863
	CD11	Caspase	F	L	29	94	FALSE	177.361	177.499
	CD11	Caspase	F	L	29	95	FALSE	193.45	193.567
	CD11	Caspase	F	L	29	96	FALSE	194.553	194.674
	CD11	Caspase	F	R	30	97	TRUE	0	3.337
	CD11	Caspase	F	R	30	98	FALSE	8.503	9.623
	CD11	Caspase	F	R	30	99	FALSE	16.122	16.722
	CD11	Caspase	F	R	30	100	FALSE	19.996	21.013
	CD11	Caspase	F	L	31	101	TRUE	0	0.281
	CD11	Caspase	F	L	31	102	TRUE	5.379	6.587
	CD11	Caspase	F	L	31	103	FALSE	126.189	127.087
	CD11	Caspase	F	R	32	104	TRUE	0	3.689
	CD11	Caspase	F	R	32	105	FALSE	6.938	7.258
	CD11	Caspase	F	R	32	106	FALSE	10.083	10.743
	CD11	Caspase	F	R	32	107	FALSE	12.615	13.038
	CD11	Caspase	F	R	32	108	FALSE	65.293	66.857
	CD11	Caspase	F	R	32	109	FALSE	69.725	70.073
	CD11	Caspase	F	L	33	110	TRUE	0	4.865
	CD11	Caspase	F	L	33	111	FALSE	7.023	7.738
	CD11	Caspase	F	L	33	112	FALSE	20.53	21.45
	CD11	Caspase	F	R	34	113	TRUE	0	2.801
	CD11	Caspase	F	R	34	114	TRUE	14.281	17.986
	CD11	Caspase	F	R	34	115	FALSE	18.014	18.144
	CD11	Caspase	F	R	34	116	FALSE	19.885	21.227
	CD11	Caspase	F	R	34	117	FALSE	21.372	22.113
	CD11	Caspase	F	R	34	118	FALSE	26.318	27.281
	CD11	Caspase	F	L	35	119	TRUE	0	2.308
	CD11	Caspase	F	L	35	120	FALSE	8.888	9.388
	CD11	Caspase	F	L	35	121	FALSE	13.952	14.414
	CD11	Caspase	F	L	35	122	FALSE	21.717	22.358
	CD11	Caspase	F	R	36	123	TRUE	0	3.122
	CD11	Caspase	F	R	36	124	FALSE	3.453	4.027
	CD11	Caspase	F	R	36	125	FALSE	8.172	8.552
	CD11	Caspase	F	L	37	126	TRUE	0	2.292
	CD11	Caspase	F	L	37	127	FALSE	3.928	4.421
	CD11	Caspase	F	R	38	128	TRUE	0	3.394
	CD11	Caspase	F	R	38	129	FALSE	3.445	4.081
	CD11	Caspase	F	R	38	130	FALSE	5.139	6.377
	CD11	Caspase	F	R	38	131	FALSE	9.185	9.641
	CD11	Caspase	F	L	39	132	TRUE	0	4.695
	CD11	Caspase	F	R	40	133	TRUE	0	1.544
	CD11	Caspase	F	L	41	134	TRUE	0	2.283
	CD11	Caspase	F	R	42	135	TRUE	0	0.227
	CD11	Caspase	F	R	42	136	FALSE	0.396	4.005
	CD11	Caspase	F	L	43	137	TRUE	0	3.453
	CD11	Caspase	F	L	43	138	TRUE	21.292	23.636
	CD11	Caspase	F	R	44	139	TRUE	0	3.558
	CD11	Caspase	F	R	44	140	FALSE	5.525	5.803
	CD11	Caspase	F	R	44	141	FALSE	33.453	35.074
	CD11	Caspase	F	L	45	142	TRUE	0	0.426
	CD11	Caspase	F	L	45	143	FALSE	5.053	5.447
	CD11	Caspase	F	R	46	144	TRUE	0	0.215
	CD11	Caspase	F	R	46	145	FALSE	35.867	38.413
	CD11	Caspase	F	L	47	146	TRUE	0	4.173
	CD11	Caspase	F	L	47	147	FALSE	5.199	5.638
	CD11	Caspase	F	R	48	148	TRUE	0	2.709
	CD11	Caspase	F	R	48	149	FALSE	4.79	5.261
	CD11	Caspase	F	L	49	150	TRUE	0	3.266
	CD11	Caspase	F	L	49	151	FALSE	39.288	40.638
	CD11	Caspase	F	R	50	152	TRUE	0	3.187
	CD11	Caspase	F	L	51	153	TRUE	0	2.659
	CD11	Caspase	F	L	51	154	FALSE	5.671	6.431
	CD11	Caspase	F	L	51	155	FALSE	63.948	64.859
	CD11	Caspase	F	R	52	156	TRUE	0	2.44
	CD11	Caspase	F	R	52	157	FALSE	231.687	232.694
	CD11	Caspase	F	R	52	158	FALSE	323.306	324.748
	CD11	Caspase	F	R	52	159	FALSE	332.314	333.065
	CD11	Caspase	F	L	53	160	TRUE	0	0.416
	CD11	Caspase	F	R	54	161	FALSE	0	1.3
	CD11	Caspase	F	R	54	162	FALSE	88.655	89.624
	CD11	Caspase	F	L	55	163	TRUE	0	2.954
	CD11	Caspase	F	L	55	164	TRUE	49.46	50.468
	CD11	Caspase	F	R	56	165	TRUE	0	0.621
	CD11	Caspase	F	L	57	166	TRUE	0	4.37
	CD11	Caspase	F	R	58	167	FALSE	0	0.547
	CD11	Caspase	F	R	58	168	FALSE	97.25	98.204
	CD11	Caspase	F	L	59	169	TRUE	0	2.353
	CD11	Caspase	F	L	59	170	FALSE	9.494	10.285
	CD11	Caspase	F	R	60	171	TRUE	0	0.281
	CD11	Caspase	F	L	61	172	TRUE	0	2.652
	CD11	Caspase	F	L	61	173	FALSE	31.65	32.043
	CD11	Caspase	F	L	61	174	FALSE	55.273	55.573
	CD11	Caspase	F	R	62	175	TRUE	0	0.3
	CD11	Caspase	F	L	63	176	TRUE	0	2.349
	CD11	Caspase	F	L	63	177	FALSE	30.947	33.277
	CD13	Caspase	M	L	1	1	FALSE	0	0.348
	CD13	Caspase	M	L	1	2	FALSE	30.741	31.342
	CD13	Caspase	M	R	2	3	TRUE	0	3.261
	CD13	Caspase	M	R	2	4	FALSE	3.308	5.343
	CD13	Caspase	M	L	3	5	TRUE	0	0.125
	CD13	Caspase	M	L	3	6	FALSE	0.32	1.199
	CD13	Caspase	M	R	4	7	TRUE	0	2.684
	CD13	Caspase	M	L	5	8	TRUE	0	1.725
	CD13	Caspase	M	L	5	9	FALSE	2.616	3.917
	CD13	Caspase	M	L	5	10	FALSE	20.828	21.065
	CD13	Caspase	M	L	5	11	FALSE	21.218	22.138
	CD13	Caspase	M	L	5	12	FALSE	23.916	24.174
	CD13	Caspase	M	R	6	13	TRUE	0	1.548
	CD13	Caspase	M	R	6	14	TRUE	1.877	3.852
	CD13	Caspase	M	L	7	15	TRUE	0	3.85
	CD13	Caspase	M	L	7	16	FALSE	4.397	5.486
	CD13	Caspase	M	L	7	17	FALSE	5.895	6.206
	CD13	Caspase	M	L	7	18	FALSE	22.984	24.312
	CD13	Caspase	M	L	7	19	FALSE	62.141	65.446
	CD13	Caspase	M	L	7	20	FALSE	65.629	66.996
	CD13	Caspase	M	L	7	21	FALSE	71.518	72.992
	CD13	Caspase	M	R	8	22	TRUE	0	1.591
	CD13	Caspase	M	R	8	23	FALSE	2.911	3.855
	CD13	Caspase	M	R	8	24	FALSE	4.442	5.24
	CD13	Caspase	M	R	8	25	FALSE	5.68	6.352
	CD13	Caspase	M	R	8	26	FALSE	13.019	13.845
	CD13	Caspase	M	R	8	27	FALSE	14.604	16.012
	CD13	Caspase	M	R	8	28	FALSE	39.617	40.805
	CD13	Caspase	M	L	9	29	TRUE	0	0.152
	CD13	Caspase	M	L	9	30	FALSE	0.401	3.057
	CD13	Caspase	M	L	9	31	FALSE	3.149	4.186
	CD13	Caspase	M	L	9	32	FALSE	5.48	6.296
	CD13	Caspase	M	L	9	33	FALSE	9.095	10.337
	CD13	Caspase	M	L	9	34	FALSE	18.564	19.511
	CD13	Caspase	M	L	9	35	FALSE	23.265	25.151
	CD13	Caspase	M	R	10	36	TRUE	0	1.589
	CD13	Caspase	M	R	10	37	FALSE	3.462	3.57
	CD13	Caspase	M	R	10	38	FALSE	3.952	5.896
	CD13	Caspase	M	L	11	39	TRUE	0	5.073
	CD13	Caspase	M	L	11	40	FALSE	5.123	5.446
	CD13	Caspase	M	L	11	41	FALSE	11.523	12.534
	CD13	Caspase	M	L	11	42	FALSE	14.546	15.454
	CD13	Caspase	M	L	11	43	FALSE	15.843	16.082
	CD13	Caspase	M	L	11	44	FALSE	16.16	16.639
	CD13	Caspase	M	R	12	45	TRUE	0	1.429
	CD13	Caspase	M	R	12	46	TRUE	1.467	1.577
	CD13	Caspase	M	R	12	47	FALSE	2.03	3.678
	CD13	Caspase	M	R	12	48	FALSE	8.534	10.752
	CD13	Caspase	M	R	12	49	FALSE	23.787	24.817
	CD13	Caspase	M	L	13	50	TRUE	0	3.283
	CD13	Caspase	M	L	13	51	FALSE	5.688	6.976
	CD13	Caspase	M	L	13	52	FALSE	8.329	9.445
	CD13	Caspase	M	L	13	53	FALSE	9.846	10.312
	CD13	Caspase	M	R	14	54	TRUE	0	2.153
	CD13	Caspase	M	R	14	55	FALSE	5.618	7.335
	CD13	Caspase	M	R	14	56	FALSE	8.078	8.874
	CD13	Caspase	M	R	14	57	FALSE	9.022	9.609
	CD13	Caspase	M	L	15	58	TRUE	0	0.999
	CD13	Caspase	M	L	15	59	FALSE	23.999	26.16
	CD13	Caspase	M	R	16	60	TRUE	0	1.397
	CD13	Caspase	M	R	16	61	FALSE	1.849	2.195
	CD13	Caspase	M	R	16	62	FALSE	6.603	7.749
	CD13	Caspase	M	R	16	63	FALSE	38.728	39.616
	CD13	Caspase	M	L	17	64	TRUE	0	3.426
	CD13	Caspase	M	L	17	65	FALSE	6.588	8.305
	CD13	Caspase	M	L	17	66	FALSE	15.392	16.256
	CD13	Caspase	M	L	17	67	FALSE	16.406	16.804
	CD13	Caspase	M	L	17	68	FALSE	16.851	17.478
	CD13	Caspase	M	R	18	69	TRUE	0	2.005
	CD13	Caspase	M	R	18	70	FALSE	2.158	3.678
	CD13	Caspase	M	R	18	71	FALSE	5.341	6.043
	CD13	Caspase	M	R	18	72	FALSE	17.387	18.41
	CD13	Caspase	M	L	19	73	TRUE	0	2.534
	CD13	Caspase	M	R	20	74	TRUE	0	4.068
	CD13	Caspase	M	L	21	75	FALSE	0	0.905
	CD13	Caspase	M	L	21	76	FALSE	35.712	36.658
	CD13	Caspase	M	R	22	77	TRUE	0	1.927
	CD13	Caspase	M	R	22	78	FALSE	3.753	5.077
	CD13	Caspase	M	R	22	79	FALSE	6.381	7.61
	CD13	Caspase	M	R	22	80	FALSE	60.685	61.399
	CD13	Caspase	M	L	23	81	TRUE	0	0.149
	CD13	Caspase	M	L	23	82	FALSE	0.496	3.48
	CD13	Caspase	M	L	23	83	FALSE	79.247	81.188
	CD13	Caspase	M	R	24	84	TRUE	0	2.506
	CD13	Caspase	M	R	24	85	FALSE	2.592	3.496
	CD13	Caspase	M	L	25	86	TRUE	0	2.36
	CD13	Caspase	M	L	25	87	FALSE	3.906	5.166
	CD13	Caspase	M	L	25	88	FALSE	5.387	6.33
	CD13	Caspase	M	L	25	89	FALSE	6.636	6.791
	CD13	Caspase	M	L	25	90	FALSE	9.47	11.64
	CD13	Caspase	M	L	25	91	FALSE	51.928	52.603
	CD13	Caspase	M	L	25	92	FALSE	58.897	59.578
	CD13	Caspase	M	R	26	93	TRUE	0	2.725
	CD13	Caspase	M	R	26	94	TRUE	6.924	9.04
	CD13	Caspase	M	R	26	95	TRUE	11.491	14.33
	CD13	Caspase	M	L	27	96	TRUE	0	0.731
	CD13	Caspase	M	L	27	97	FALSE	1.439	2.975
	CD13	Caspase	M	L	27	98	FALSE	5.089	5.832
	CD13	Caspase	M	L	27	99	FALSE	7.951	8.472
	CD13	Caspase	M	L	27	100	FALSE	10.282	10.862
	CD13	Caspase	M	L	27	101	FALSE	11.546	11.877
	CD13	Caspase	M	L	27	102	FALSE	29.633	30.288
	CD13	Caspase	M	L	27	103	FALSE	30.599	31.381
	CD13	Caspase	M	L	27	104	FALSE	32.75	33.928
	CD13	Caspase	M	R	28	105	TRUE	0	1.896
	CD13	Caspase	M	R	28	106	FALSE	2.134	2.912
	CD13	Caspase	M	R	28	107	FALSE	3.255	3.721
	CD13	Caspase	M	R	28	108	FALSE	5.016	5.722
	CD13	Caspase	M	R	28	109	FALSE	5.808	6.542
	CD13	Caspase	M	R	28	110	FALSE	9.22	10.016
	CD13	Caspase	M	R	28	111	FALSE	10.364	10.63
	CD13	Caspase	M	L	29	112	TRUE	0	0.589
	CD13	Caspase	M	R	30	113	TRUE	0	1.836
	CD13	Caspase	M	R	30	114	FALSE	4.621	5.547
	CD13	Caspase	M	L	31	115	TRUE	0	2.553
	CD13	Caspase	M	L	31	116	FALSE	5.349	6.102
	CD13	Caspase	M	L	31	117	FALSE	13.673	14.036
	CD13	Caspase	M	R	32	118	TRUE	0	2.497
	CD13	Caspase	M	R	32	119	FALSE	4.231	4.478
	CD13	Caspase	M	R	32	120	FALSE	5.054	5.835
	CD13	Caspase	M	R	32	121	FALSE	6.285	8.188
	CD13	Caspase	M	R	32	122	FALSE	9.968	10.284
	CD13	Caspase	M	R	32	123	FALSE	15.244	15.851
	CD13	Caspase	M	R	32	124	FALSE	37.2	37.824
	CD13	Caspase	M	L	33	125	TRUE	0	3.023
	CD13	Caspase	M	L	33	126	TRUE	3.296	5.219
	CD13	Caspase	M	L	33	127	FALSE	6.757	7.779
	CD13	Caspase	M	L	33	128	FALSE	9.611	11.118
	CD13	Caspase	M	L	33	129	FALSE	11.572	13.799
	CD13	Caspase	M	L	33	130	FALSE	20.259	20.698
	CD13	Caspase	M	L	33	131	FALSE	58.96	60.102
	CD13	Caspase	M	R	34	132	TRUE	0	1.42
	CD13	Caspase	M	R	34	133	TRUE	1.766	4.226
	CD13	Caspase	M	R	34	134	FALSE	5.477	6.228
	CD13	Caspase	M	R	34	135	FALSE	6.357	6.781
	CD13	Caspase	M	R	34	136	FALSE	7.034	7.165
	CD13	Caspase	M	R	34	137	FALSE	7.323	7.887
	CD13	Caspase	M	R	34	138	FALSE	10.023	11.362
	CD13	Caspase	M	R	34	139	FALSE	11.747	11.904
	CD13	Caspase	M	R	34	140	FALSE	17.551	17.731
	CD13	Caspase	M	R	34	141	FALSE	18.095	19.762
	CD13	Caspase	M	R	34	142	FALSE	21.66	21.761
	CD13	Caspase	M	R	34	143	FALSE	23.956	24.514
	CD13	Caspase	M	R	34	144	FALSE	27.059	27.39
	CD13	Caspase	M	R	34	145	FALSE	33.701	34.225
	CD13	Caspase	M	R	34	146	FALSE	39.538	40.489
	CD13	Caspase	M	L	35	147	TRUE	0	2.761
	CD13	Caspase	M	L	35	148	FALSE	4.105	4.849
	CD13	Caspase	M	L	35	149	FALSE	5.13	5.48
	CD13	Caspase	M	L	35	150	FALSE	35.139	37.147
	CD13	Caspase	M	R	36	151	TRUE	0	1.824
	CD13	Caspase	M	R	36	152	FALSE	2.084	2.871
	CD13	Caspase	M	R	36	153	FALSE	4.395	5.666
	CD13	Caspase	M	L	37	154	TRUE	0	3.259
	CD13	Caspase	M	L	37	155	FALSE	3.477	4.522
	CD13	Caspase	M	L	37	156	FALSE	5.742	6.772
	CD13	Caspase	M	L	37	157	FALSE	13.016	13.9
	CD13	Caspase	M	L	37	158	FALSE	72.001	72.697
	CD13	Caspase	M	L	37	159	FALSE	121.979	123.594
	CD13	Caspase	M	L	37	160	FALSE	124.673	124.872
	CD13	Caspase	M	L	37	161	FALSE	128.243	129.072
	CD13	Caspase	M	R	38	162	TRUE	0	0.173
	CD13	Caspase	M	R	38	163	FALSE	0.331	5.399
	CD13	Caspase	M	R	38	164	FALSE	9.98	10.736
	CD13	Caspase	M	R	38	165	FALSE	50.977	52.027
	CD13	Caspase	M	L	39	166	TRUE	0	3.621
	CD13	Caspase	M	L	39	167	TRUE	3.949	4.322
	CD13	Caspase	M	L	39	168	FALSE	5.093	6.728
	CD13	Caspase	M	L	39	169	FALSE	7.3	8.523
	CD13	Caspase	M	L	39	170	FALSE	14.048	14.876
	CD13	Caspase	M	L	39	171	FALSE	15.176	15.323
	CD13	Caspase	M	L	39	172	FALSE	25.137	25.697
	CD13	Caspase	M	L	39	173	FALSE	27.859	28.004
	CD13	Caspase	M	L	39	174	FALSE	28.554	28.655
	CD13	Caspase	M	L	39	175	FALSE	28.671	29.221
	CD13	Caspase	M	L	39	176	FALSE	30.981	31.161
	CD13	Caspase	M	R	40	177	TRUE	0	2.058
	CD13	Caspase	M	R	40	178	FALSE	2.179	3.258
	CD13	Caspase	M	R	40	179	FALSE	4.724	6.079
	CD13	Caspase	M	R	40	180	FALSE	10.268	10.877
	CD13	Caspase	M	R	40	181	FALSE	35.826	37.158
	CD13	Caspase	M	R	40	182	FALSE	71.849	72.777
	CD13	Caspase	M	R	40	183	FALSE	73.196	73.317
	CD13	Caspase	M	L	41	184	TRUE	0	1.021
	CD13	Caspase	M	R	42	185	TRUE	0	3.682
	CD13	Caspase	M	R	42	186	FALSE	5.029	6.429
	CD13	Caspase	M	L	43	187	TRUE	0	3.695
	CD13	Caspase	M	R	44	188	TRUE	0	2.402
	CD13	Caspase	M	L	45	189	TRUE	0	1.671
	CD13	Caspase	M	L	45	190	FALSE	1.811	2.422
	CD13	Caspase	M	L	45	191	FALSE	3.288	4.889
	CD13	Caspase	M	L	45	192	FALSE	5.039	5.719
	CD13	Caspase	M	L	45	193	FALSE	7.02	7.552
	CD13	Caspase	M	L	45	194	FALSE	7.943	8.77
	CD13	Caspase	M	L	45	195	FALSE	10.066	10.654
	CD13	Caspase	M	R	46	196	TRUE	0	1.974
	CD13	Caspase	M	R	46	197	FALSE	10.315	11.316
	CD13	Caspase	M	R	46	198	FALSE	11.36	11.593
	CD13	Caspase	M	R	46	199	FALSE	27.925	29.348
	CD13	Caspase	M	L	47	200	TRUE	0	2.257
	CD13	Caspase	M	L	47	201	FALSE	2.663	3.755
	CD13	Caspase	M	R	48	202	TRUE	0	5.848
	CD13	Caspase	M	R	48	203	FALSE	10.959	11.99
	CD13	Caspase	M	L	49	204	TRUE	0	1.206
	CD13	Caspase	M	L	49	205	FALSE	1.614	1.81
	CD13	Caspase	M	L	49	206	FALSE	5.098	5.465
	CD13	Caspase	M	R	50	207	TRUE	0	2.779
	CD13	Caspase	M	R	50	208	FALSE	3.331	3.956
	CD13	Caspase	M	R	50	209	FALSE	4.881	5.192
	CD13	Caspase	M	R	50	210	FALSE	12.63	13.058
	CD13	Caspase	M	L	51	211	TRUE	0	0.242
	CD13	Caspase	M	L	51	212	FALSE	3.39	4.615
	CD13	Caspase	M	L	51	213	FALSE	5.195	6.2
	CD13	Caspase	M	L	51	214	FALSE	7.361	8.011
	CD13	Caspase	M	L	51	215	FALSE	8.385	8.999
	CD13	Caspase	M	L	51	216	FALSE	9.396	9.977
	CD13	Caspase	M	L	51	217	FALSE	14.163	14.987
	CD13	Caspase	M	L	51	218	FALSE	16.793	17.248
	CD13	Caspase	M	L	51	219	FALSE	30.94	31.774
	CD13	Caspase	M	R	52	220	TRUE	0	2.898
	CD13	Caspase	M	R	52	221	FALSE	4.409	5.17
	CD13	Caspase	M	R	52	222	FALSE	19.005	19.827
	CD13	Caspase	M	R	52	223	FALSE	22.065	22.803
	CD13	Caspase	M	L	53	224	TRUE	0	3.926
	CD13	Caspase	M	L	53	225	FALSE	4.646	5.087
	CD13	Caspase	M	L	53	226	FALSE	11.144	11.497
	CD13	Caspase	M	R	54	227	TRUE	0	2.458
	CD13	Caspase	M	L	55	228	TRUE	0	4.204
	CD13	Caspase	M	L	55	229	FALSE	8.607	9.257
	CD13	Caspase	M	L	55	230	FALSE	9.357	9.604
	CD13	Caspase	M	R	56	231	TRUE	0	3.363
	CD13	Caspase	M	R	56	232	FALSE	7.493	8.036
	CD13	Caspase	M	R	56	233	FALSE	12.113	12.523
	CD13	Caspase	M	L	57	234	TRUE	0	3.747
	CD13	Caspase	M	L	57	235	FALSE	3.86	4.634
	CD13	Caspase	M	L	57	236	FALSE	5.775	6.255
	CD13	Caspase	M	R	58	237	TRUE	0	2.767
	CD13	Caspase	M	R	58	238	FALSE	4.609	5.342
	CD13	Caspase	M	R	58	239	FALSE	5.537	5.991
	CD13	Caspase	M	L	59	240	TRUE	0	2.95
	CD13	Caspase	M	L	59	241	FALSE	4.175	4.742
	CD13	Caspase	M	R	60	242	TRUE	0	2.395
	CD13	Caspase	M	R	60	243	FALSE	11.74	13.311
	CD13	Caspase	M	R	60	244	FALSE	22.776	23.245
	CD13	Caspase	M	L	61	245	TRUE	0	3.089
	CD13	Caspase	M	L	61	246	FALSE	7.171	7.679
	CD13	Caspase	M	R	62	247	TRUE	0	2.131
	CD13	Caspase	M	R	62	248	FALSE	3.755	4.499
	CD13	Caspase	M	R	62	249	FALSE	23.898	24.91
	CD13	Caspase	M	L	63	250	TRUE	0	2.843
	CD13	Caspase	M	R	64	251	TRUE	0	2.044
	CD13	Caspase	M	R	64	252	FALSE	3.533	4.424
	CD13	Caspase	M	L	65	253	TRUE	0	3.346
	CD13	Caspase	M	L	65	254	FALSE	4.825	5.74
	CD13	Caspase	M	R	66	255	TRUE	0	2.528
	CD13	Caspase	M	R	66	256	FALSE	3.673	3.891
	CD13	Caspase	M	L	67	257	TRUE	0	2.04
	CD13	Caspase	M	L	67	258	FALSE	27.326	28.529
	CD13	Caspase	M	R	68	259	TRUE	0	2.563
	CD13	Caspase	M	R	68	260	FALSE	28.262	29.397
	CD13	Caspase	M	L	69	261	TRUE	0	3.593
	CD13	Caspase	M	R	70	262	TRUE	0	1.446
	CD13	Caspase	M	R	70	263	FALSE	4.389	5.894
	CD13	Caspase	M	L	71	264	TRUE	0	2.818
	CD13	Caspase	M	L	71	265	FALSE	11.01	11.968
	CD13	Caspase	M	R	72	266	TRUE	0	2.439
	CD13	Caspase	M	R	72	267	FALSE	6.181	6.839
	CD13	Caspase	M	L	73	268	TRUE	0	2.412
	CD13	Caspase	M	L	73	269	FALSE	5.592	6.811
	CD13	Caspase	M	L	73	270	FALSE	7.087	7.439
	CD13	Caspase	M	L	73	271	FALSE	9.817	10.258
	CD13	Caspase	M	R	74	272	TRUE	0	2.273
	CD13	Caspase	M	R	74	273	FALSE	4.131	4.431
	CD13	Caspase	M	L	75	274	TRUE	0	1.893
	CD13	Caspase	M	L	75	275	TRUE	3.148	4.702
	CD13	Caspase	M	L	75	276	FALSE	4.765	6.552
	CD13	Caspase	M	L	75	277	FALSE	9.338	10.267
	CD13	Caspase	M	L	75	278	FALSE	10.554	12.005
	CD13	Caspase	M	R	76	279	TRUE	0	2.447
	CD13	Caspase	M	R	76	280	FALSE	3.948	4.484
	CD13	Caspase	M	L	77	281	TRUE	0	2.586
	CD13	Caspase	M	L	77	282	FALSE	3.688	4.205
	CD13	Caspase	M	R	78	283	TRUE	0	1.673
	CD13	Caspase	M	R	78	284	FALSE	8.776	9.857
	CD13	Caspase	M	L	79	285	TRUE	0	3.444
	CD13	Caspase	M	L	79	286	TRUE	4.245	5.591
	CD13	Caspase	M	L	79	287	FALSE	5.899	6.445
	CD13	Caspase	M	L	79	288	FALSE	6.566	6.672
	CD13	Caspase	M	L	79	289	FALSE	6.719	7.382
	CD13	Caspase	M	L	79	290	FALSE	9.338	10.041
	CD13	Caspase	M	L	79	291	FALSE	10.427	10.77
	CD13	Caspase	M	L	79	292	FALSE	16.958	17.481
	CD13	Caspase	M	R	80	293	TRUE	0	2.185
	CD13	Caspase	M	R	80	294	FALSE	3.216	3.539
	CD13	Caspase	M	R	80	295	FALSE	13.246	13.598
	CD13	Caspase	M	R	80	296	FALSE	22.945	23.332
	CD13	Caspase	M	L	81	297	TRUE	0	2.603
	CD13	Caspase	M	R	82	298	TRUE	0	2.375
	CD13	Caspase	M	L	83	299	FALSE	0	0.802
	CD13	Caspase	M	R	84	300	TRUE	0	2.28
	CD13	Caspase	M	L	85	301	TRUE	0	2.266
	CD13	Caspase	M	L	85	302	FALSE	13.628	14.259
	CD13	Caspase	M	R	86	303	TRUE	0	2.271
	CD13	Caspase	M	R	86	304	FALSE	10.317	11.061
	CD13	Caspase	M	L	87	305	TRUE	0	1.823
	CD13	Caspase	M	R	88	306	TRUE	0	3.139
	CD13	Caspase	M	R	88	307	FALSE	8.191	8.573
	CD13	Caspase	M	L	89	308	TRUE	0	1.693
	CD13	Caspase	M	L	89	309	TRUE	1.823	1.947
	CD13	Caspase	M	L	89	310	FALSE	2.013	3.714
	CD13	Caspase	M	L	89	311	FALSE	5.508	6.668
	CD13	Caspase	M	R	90	312	TRUE	0	1.69
	CD13	Caspase	M	R	90	313	TRUE	8.705	10.519
	CD13	Caspase	M	L	91	314	TRUE	0	0.121
	CD13	Caspase	M	L	91	315	FALSE	0.19	1.819
	CD13	Caspase	M	L	91	316	FALSE	4.696	6.622
	CD13	Caspase	M	R	92	317	TRUE	0	2.393
	CD13	Caspase	M	R	92	318	TRUE	14.156	16.516
	CD13	Caspase	M	R	92	319	FALSE	18.644	19.055
	CD13	Caspase	M	L	93	320	TRUE	0	2.701
	CD13	Caspase	M	L	93	321	FALSE	3.157	4.586
	CD13	Caspase	M	L	93	322	FALSE	6.1	7.479
	CD13	Caspase	M	L	93	323	FALSE	7.751	8.55
	CD13	Caspase	M	R	94	324	TRUE	0	1.873
	CD13	Caspase	M	R	94	325	FALSE	7.102	7.628
	CD13	Caspase	M	L	95	326	TRUE	0	2.459
	CD13	Caspase	M	L	95	327	FALSE	6.261	6.967
	CD13	Caspase	M	R	96	328	TRUE	0	2.471
	CD13	Caspase	M	L	97	329	TRUE	0	3.286
	CD13	Caspase	M	L	97	330	FALSE	15.697	16.091
	CD13	Caspase	M	R	98	331	TRUE	0	2.485
	CD13	Caspase	M	L	99	332	TRUE	0	2.386
	CD13	Caspase	M	R	100	333	TRUE	0	2.274
	CD13	Caspase	M	R	100	334	FALSE	3.901	4.363
	CD13	Caspase	M	R	100	335	FALSE	27.808	28.354
	CD13	Caspase	M	R	100	336	FALSE	53.108	53.716
	CD13	Caspase	M	L	101	337	TRUE	0	2.848
	CD13	Caspase	M	L	101	338	FALSE	3.133	3.541
	CD13	Caspase	M	L	101	339	FALSE	18.302	18.693
	CD14	Caspase	F	R	1	1	TRUE	0	0.288
	CD14	Caspase	F	R	1	2	FALSE	0.307	2.115
	CD14	Caspase	F	R	1	3	FALSE	4.166	6.101
	CD14	Caspase	F	R	1	4	FALSE	6.192	7.537
	CD14	Caspase	F	R	1	5	FALSE	7.726	8.025
	CD14	Caspase	F	R	1	6	FALSE	42.945	45.114
	CD14	Caspase	F	L	2	7	TRUE	0	0.427
	CD14	Caspase	F	L	2	8	TRUE	0.929	1.505
	CD14	Caspase	F	L	2	9	FALSE	2.224	2.548
	CD14	Caspase	F	L	2	10	FALSE	2.912	6.193
	CD14	Caspase	F	L	2	11	FALSE	6.281	8.275
	CD14	Caspase	F	L	2	12	FALSE	32.088	33.125
	CD14	Caspase	F	L	2	13	FALSE	43.74	44.968
	CD14	Caspase	F	L	2	14	FALSE	72.493	72.629
	CD14	Caspase	F	R	3	15	TRUE	0	3.018
	CD14	Caspase	F	R	3	16	FALSE	37.829	38.607
	CD14	Caspase	F	L	4	17	TRUE	0	1.843
	CD14	Caspase	F	R	5	18	TRUE	0	1.575
	CD14	Caspase	F	L	6	19	TRUE	0	0.301
	CD14	Caspase	F	L	6	20	TRUE	0.52	0.775
	CD14	Caspase	F	R	7	21	TRUE	0	3.736
	CD14	Caspase	F	R	7	22	FALSE	8.029	9.234
	CD14	Caspase	F	L	8	23	TRUE	0	3.686
	CD14	Caspase	F	L	8	24	FALSE	9.13	10.178
	CD14	Caspase	F	L	8	25	FALSE	10.394	11.7
	CD14	Caspase	F	L	8	26	FALSE	12.828	14.033
	CD14	Caspase	F	R	9	27	TRUE	0	1.383
	CD14	Caspase	F	L	10	28	TRUE	0	2.596
	CD14	Caspase	F	L	10	29	FALSE	8.248	8.945
	CD14	Caspase	F	L	10	30	FALSE	9.179	10.217
	CD14	Caspase	F	L	10	31	FALSE	80.399	81.385
	CD14	Caspase	F	L	10	32	FALSE	81.812	82.191
	CD14	Caspase	F	L	10	33	FALSE	94.9	96.203
	CD14	Caspase	F	R	11	34	TRUE	0	4.52
	CD14	Caspase	F	R	11	35	FALSE	11.596	12.532
	CD14	Caspase	F	R	11	36	FALSE	88.251	88.721
	CD14	Caspase	F	R	11	37	FALSE	88.756	89.35
	CD14	Caspase	F	R	11	38	FALSE	90.213	91.225
	CD14	Caspase	F	R	11	39	FALSE	114.245	115.362
	CD14	Caspase	F	L	12	40	TRUE	0	1.743
	CD14	Caspase	F	L	12	41	FALSE	4.773	6.638
	CD14	Caspase	F	L	12	42	FALSE	6.867	7.284
	CD14	Caspase	F	L	12	43	FALSE	8.984	9.117
	CD14	Caspase	F	L	12	44	FALSE	9.71	10.856
	CD14	Caspase	F	R	13	45	TRUE	0	4.418
	CD14	Caspase	F	L	14	46	TRUE	0	2.602
	CD14	Caspase	F	L	14	47	FALSE	4.079	4.752
	CD14	Caspase	F	L	14	48	FALSE	55.739	56.392
	CD14	Caspase	F	R	15	49	TRUE	0	1.828
	CD14	Caspase	F	R	15	50	FALSE	1.866	3.048
	CD14	Caspase	F	R	15	51	FALSE	3.783	3.916
	CD14	Caspase	F	R	15	52	FALSE	4.032	4.27
	CD14	Caspase	F	R	15	53	FALSE	4.346	4.529
	CD14	Caspase	F	R	15	54	FALSE	4.547	5.052
	CD14	Caspase	F	R	15	55	FALSE	5.56	6.698
	CD14	Caspase	F	R	15	56	FALSE	17.911	18.843
	CD14	Caspase	F	L	16	57	TRUE	0	2.985
	CD14	Caspase	F	L	16	58	TRUE	9.911	13.029
	CD14	Caspase	F	L	16	59	FALSE	13.383	14.391
	CD14	Caspase	F	L	16	60	FALSE	15.328	15.804
	CD14	Caspase	F	L	16	61	FALSE	16.487	18.002
	CD14	Caspase	F	R	17	62	TRUE	0	2.682
	CD14	Caspase	F	R	17	63	FALSE	3.28	3.889
	CD14	Caspase	F	R	17	64	FALSE	7.358	9.066
	CD14	Caspase	F	R	17	65	FALSE	9.571	9.935
	CD14	Caspase	F	R	17	66	FALSE	40.914	42.233
	CD14	Caspase	F	L	18	67	TRUE	0	5.474
	CD14	Caspase	F	L	18	68	FALSE	7.969	9.207
	CD14	Caspase	F	L	18	69	FALSE	9.535	9.998
	CD14	Caspase	F	R	19	70	TRUE	0	2.543
	CD14	Caspase	F	R	19	71	FALSE	4.674	5.579
	CD14	Caspase	F	R	19	72	FALSE	7.76	9.321
	CD14	Caspase	F	R	19	73	FALSE	9.447	10.04
	CD14	Caspase	F	R	19	74	FALSE	13.007	13.767
	CD14	Caspase	F	R	19	75	FALSE	16.252	16.924
	CD14	Caspase	F	R	19	76	FALSE	19.178	19.955
	CD14	Caspase	F	R	19	77	FALSE	20.174	20.799
	CD14	Caspase	F	L	20	78	TRUE	0	2.676
	CD14	Caspase	F	L	20	79	FALSE	17.99	18.31
	CD14	Caspase	F	R	21	80	TRUE	0	4.12
	CD14	Caspase	F	L	22	81	TRUE	0	3.593
	CD14	Caspase	F	L	22	82	FALSE	4.13	6.724
	CD14	Caspase	F	L	22	83	FALSE	6.782	6.908
	CD14	Caspase	F	L	22	84	FALSE	7.399	7.989
	CD14	Caspase	F	L	22	85	FALSE	8.249	11.371
	CD14	Caspase	F	L	22	86	FALSE	11.494	12.364
	CD14	Caspase	F	R	23	87	TRUE	0	2.699
	CD14	Caspase	F	R	23	88	FALSE	2.765	3.292
	CD14	Caspase	F	R	23	89	FALSE	3.421	4.036
	CD14	Caspase	F	R	23	90	FALSE	4.527	4.824
	CD14	Caspase	F	R	23	91	FALSE	5.184	5.958
	CD14	Caspase	F	R	23	92	FALSE	10.976	12.014
	CD14	Caspase	F	L	24	93	TRUE	0	4.194
	CD14	Caspase	F	L	24	94	FALSE	4.432	4.782
	CD14	Caspase	F	L	24	95	FALSE	17.94	19.214
	CD14	Caspase	F	L	24	96	FALSE	54.965	55.158
	CD14	Caspase	F	L	24	97	FALSE	55.187	55.389
	CD14	Caspase	F	L	24	98	FALSE	55.471	56.549
	CD14	Caspase	F	R	25	99	TRUE	0	2.37
	CD14	Caspase	F	R	25	100	FALSE	3.803	5.472
	CD14	Caspase	F	R	25	101	FALSE	5.56	5.819
	CD14	Caspase	F	L	26	102	TRUE	0	1.109
	CD14	Caspase	F	L	26	103	FALSE	1.198	1.709
	CD14	Caspase	F	R	27	104	TRUE	0	2.373
	CD14	Caspase	F	R	27	105	FALSE	2.453	6.351
	CD14	Caspase	F	L	28	106	TRUE	0	2.326
	CD14	Caspase	F	R	29	107	TRUE	0	2.231
	CD14	Caspase	F	R	29	108	FALSE	12.935	14.052
	CD14	Caspase	F	L	30	109	TRUE	0	1.603
	CD14	Caspase	F	L	30	110	FALSE	1.982	7.064
	CD14	Caspase	F	L	30	111	FALSE	7.149	7.443
	CD14	Caspase	F	R	31	112	TRUE	0	2.766
	CD14	Caspase	F	R	31	113	FALSE	5.623	6.646
	CD14	Caspase	F	L	32	114	TRUE	0	3.75
	CD14	Caspase	F	R	33	115	TRUE	0	2.649
	CD14	Caspase	F	R	33	116	FALSE	2.742	3.367
	CD14	Caspase	F	R	33	117	FALSE	7.422	8.548
	CD14	Caspase	F	L	34	118	TRUE	0	2.992
	CD14	Caspase	F	R	35	119	TRUE	0	3.713
	CD14	Caspase	F	R	35	120	FALSE	3.8	3.907
	CD14	Caspase	F	R	35	121	FALSE	4.294	5.488
	CD14	Caspase	F	R	35	122	FALSE	8.849	10.117
	CD14	Caspase	F	R	35	123	FALSE	14.286	15.006
	CD14	Caspase	F	L	36	124	TRUE	0	2.374
	CD14	Caspase	F	L	36	125	FALSE	2.446	2.558
	CD14	Caspase	F	L	36	126	FALSE	2.68	3.504
	CD14	Caspase	F	L	36	127	FALSE	6.305	7.173
	CD14	Caspase	F	L	36	128	FALSE	16.88	17.019
	CD14	Caspase	F	R	37	129	TRUE	0	1.594
	CD14	Caspase	F	R	37	130	FALSE	1.831	2.587
	CD14	Caspase	F	L	38	131	TRUE	0	0.33
	CD14	Caspase	F	R	39	132	TRUE	0	3.318
	CD14	Caspase	F	R	39	133	FALSE	15.331	16.319
	CD14	Caspase	F	R	39	134	FALSE	35.58	36.258
	CD14	Caspase	F	L	40	135	TRUE	0	3.305
	CD14	Caspase	F	L	40	136	FALSE	3.4	3.586
	CD14	Caspase	F	L	40	137	FALSE	5.329	7.511
	CD14	Caspase	F	L	40	138	FALSE	9.402	10.204
	CD14	Caspase	F	R	41	139	TRUE	0	2.181
	CD14	Caspase	F	R	41	140	FALSE	3.99	4.607
	CD14	Caspase	F	R	41	141	FALSE	6.098	7.11
	CD14	Caspase	F	R	41	142	FALSE	7.534	8.11
	CD14	Caspase	F	R	41	143	FALSE	27.816	28.749
	CD14	Caspase	F	L	42	144	TRUE	0	2.545
	CD14	Caspase	F	R	43	145	TRUE	0	2.014
	CD14	Caspase	F	R	43	146	FALSE	2.19	2.494
	CD14	Caspase	F	L	44	147	TRUE	0	1.003
	CD14	Caspase	F	L	44	148	FALSE	1.388	1.869
	CD14	Caspase	F	R	45	149	TRUE	0	3.869
	CD14	Caspase	F	R	45	150	TRUE	4.101	6.655
	CD14	Caspase	F	R	45	151	FALSE	6.724	7.221
	CD14	Caspase	F	R	45	152	FALSE	9.586	10.138
	CD14	Caspase	F	R	45	153	FALSE	10.452	10.868
	CD14	Caspase	F	R	45	154	FALSE	12.721	13.111
	CD14	Caspase	F	R	45	155	FALSE	28.592	29.624
	CD14	Caspase	F	L	46	156	TRUE	0	2.42
	CD14	Caspase	F	L	46	157	FALSE	4.002	4.465
	CD14	Caspase	F	R	47	158	TRUE	0	3.079
	CD14	Caspase	F	R	47	159	FALSE	5.223	6.042
	CD14	Caspase	F	R	47	160	FALSE	11.418	12.116
	CD14	Caspase	F	R	47	161	FALSE	15.599	15.826
	CD14	Caspase	F	R	47	162	FALSE	27.047	27.426
	CD14	Caspase	F	L	48	163	TRUE	0	0.146
	CD14	Caspase	F	L	48	164	TRUE	0.19	4.098
	CD14	Caspase	F	L	48	165	TRUE	5.763	8.367
	CD14	Caspase	F	L	48	166	FALSE	8.551	9.368
	CD14	Caspase	F	L	48	167	FALSE	12.129	12.861
	CD14	Caspase	F	L	48	168	FALSE	16.829	17.592
	CD14	Caspase	F	L	48	169	FALSE	33.861	34.959
	CD14	Caspase	F	L	48	170	FALSE	36.035	36.504
	CD14	Caspase	F	R	49	171	TRUE	0	2.256
	CD14	Caspase	F	L	50	172	TRUE	0	0.272
	CD14	Caspase	F	L	50	173	TRUE	0.443	0.552
	CD14	Caspase	F	L	50	174	FALSE	1.194	3.93
	CD14	Caspase	F	L	50	175	FALSE	4.108	4.44
	CD14	Caspase	F	L	50	176	FALSE	8.142	10.081
	CD14	Caspase	F	R	51	177	TRUE	0	1.254
	CD14	Caspase	F	R	51	178	FALSE	2.719	4.561
	CD14	Caspase	F	R	51	179	FALSE	14.003	14.934
	CD14	Caspase	F	R	51	180	FALSE	22.006	22.849
	CD14	Caspase	F	L	52	181	TRUE	0	1.629
	CD14	Caspase	F	L	52	182	FALSE	1.857	2.236
	CD14	Caspase	F	L	52	183	FALSE	15.047	16.188
	CD14	Caspase	F	R	53	184	TRUE	0	2.495
	CD14	Caspase	F	R	53	185	FALSE	4.959	5.689
	CD14	Caspase	F	R	53	186	FALSE	27.957	29.156
	CD14	Caspase	F	L	54	187	TRUE	0	1.883
	CD14	Caspase	F	L	54	188	TRUE	1.895	4.639
	CD14	Caspase	F	L	54	189	FALSE	6.889	7.18
	CD14	Caspase	F	L	54	190	FALSE	8.119	9.225
	CD14	Caspase	F	L	54	191	FALSE	9.505	10.568
	CD14	Caspase	F	R	55	192	TRUE	0	2.999
	CD14	Caspase	F	L	56	193	FALSE	0	1.014
	CD14	Caspase	F	R	57	194	TRUE	0	2.417
	CD14	Caspase	F	R	57	195	TRUE	2.509	2.673
	CD14	Caspase	F	R	57	196	FALSE	2.718	5.002
	CD14	Caspase	F	R	57	197	FALSE	5.04	5.397
	CD14	Caspase	F	R	57	198	FALSE	7.798	9.491
	CD14	Caspase	F	L	58	199	TRUE	0	1.873
	CD14	Caspase	F	L	58	200	FALSE	3.442	5.011
	CD14	Caspase	F	L	58	201	FALSE	5.042	5.859
	CD14	Caspase	F	L	58	202	FALSE	38.717	39.712
	CD14	Caspase	F	L	58	203	FALSE	47.771	48.294
	CD14	Caspase	F	R	59	204	TRUE	0	2.991
	CD14	Caspase	F	R	59	205	FALSE	3.144	3.515
	CD14	Caspase	F	R	59	206	FALSE	15.097	16.306
	CD14	Caspase	F	R	59	207	FALSE	16.365	16.71
	CD14	Caspase	F	R	59	208	FALSE	22.986	23.308
	CD14	Caspase	F	L	60	209	TRUE	0	3.558
	CD14	Caspase	F	L	60	210	FALSE	15.379	16.34
	CD14	Caspase	F	L	60	211	FALSE	73.136	74.39
	CD14	Caspase	F	L	60	212	FALSE	74.83	75.403
	CD14	Caspase	F	R	61	213	TRUE	0	2.569
	CD14	Caspase	F	R	61	214	FALSE	4.668	5.714
	CD14	Caspase	F	R	61	215	FALSE	5.731	6.272
	CD14	Caspase	F	L	62	216	TRUE	0	3.21
	CD14	Caspase	F	L	62	217	FALSE	3.349	3.757
	CD14	Caspase	F	L	62	218	FALSE	8.533	9.178
	CD14	Caspase	F	R	63	219	TRUE	0	2.975
	CD14	Caspase	F	R	63	220	FALSE	4.287	4.905
	CD14	Caspase	F	L	64	221	TRUE	0	0.182
	CD14	Caspase	F	L	64	222	FALSE	0.6	2.638
	CD14	Caspase	F	L	64	223	FALSE	13.175	14.233
	CD14	Caspase	F	R	65	224	TRUE	0	4.556
	CD14	Caspase	F	R	65	225	FALSE	4.73	6.257
	CD14	Caspase	F	R	65	226	FALSE	7.989	8.308
	CD14	Caspase	F	R	65	227	FALSE	21.963	23.183
	CD14	Caspase	F	R	65	228	FALSE	23.239	23.407
	CD14	Caspase	F	R	65	229	FALSE	23.437	23.811
	CD14	Caspase	F	R	65	230	FALSE	38.341	38.922
	CD14	Caspase	F	L	66	231	TRUE	0	2.975
	CD14	Caspase	F	L	66	232	FALSE	3.189	3.52
	CD14	Caspase	F	R	67	233	TRUE	0	1.994
	CD14	Caspase	F	R	67	234	FALSE	3.215	3.611
	CD14	Caspase	F	R	67	235	FALSE	4.776	5.503
	CD14	Caspase	F	L	68	236	TRUE	0	2.06
	CD14	Caspase	F	R	69	237	TRUE	0	2.871
	CD14	Caspase	F	R	69	238	FALSE	3.411	3.815
	CD14	Caspase	F	L	70	239	TRUE	0	2.626
	CD14	Caspase	F	R	71	240	TRUE	0	0.675
	CD14	Caspase	F	L	72	241	TRUE	0	2.206
	CD14	Caspase	F	L	72	242	FALSE	2.38	2.706
	CD14	Caspase	F	R	73	243	TRUE	0	2.33
	CD14	Caspase	F	L	74	244	TRUE	0	2.983
	CD14	Caspase	F	L	74	245	TRUE	5.927	9.07
	CD14	Caspase	F	L	74	246	FALSE	10.356	10.922
	CD14	Caspase	F	L	74	247	FALSE	12.456	14.494
	CD14	Caspase	F	L	74	248	FALSE	14.876	15.148
	CD14	Caspase	F	L	74	249	FALSE	18.857	19.04
	CD14	Caspase	F	R	75	250	TRUE	0	2.218
	CD14	Caspase	F	R	75	251	FALSE	5.392	5.994
	CD14	Caspase	F	L	76	252	TRUE	0	2.911
	CD14	Caspase	F	L	76	253	FALSE	4.382	4.798
	CD14	Caspase	F	L	76	254	FALSE	18.785	19.667
	CD14	Caspase	F	L	76	255	FALSE	54.372	55.239
	CD14	Caspase	F	L	76	256	FALSE	96.384	97.413
	CD14	Caspase	F	L	76	257	FALSE	97.44	97.995
	CD14	Caspase	F	R	77	258	TRUE	0	2.09
	CD14	Caspase	F	R	77	259	FALSE	2.169	2.469
	CD14	Caspase	F	L	78	260	TRUE	0	2.717
	CD14	Caspase	F	R	79	261	TRUE	0	2.267
	CD14	Caspase	F	R	79	262	FALSE	13.38	14.062
	CD14	Caspase	F	L	80	263	TRUE	0	2.513
	CD14	Caspase	F	L	80	264	FALSE	10.071	10.806
	CD14	Caspase	F	R	81	265	TRUE	0	1.728
	CD14	Caspase	F	L	82	266	TRUE	0	1.774
	CD14	Caspase	F	L	82	267	FALSE	2.038	2.383
	CD14	Caspase	F	R	83	268	TRUE	0	2.411
	CD14	Caspase	F	R	83	269	TRUE	3.127	6.178
	CD14	Caspase	F	R	83	270	FALSE	7.653	8.144
	CD14	Caspase	F	R	83	271	FALSE	8.164	8.572
	CD14	Caspase	F	R	83	272	FALSE	18.86	19.334
	CD14	Caspase	F	L	84	273	TRUE	0	2.255
	CD14	Caspase	F	L	84	274	FALSE	4.092	4.69
	CD14	Caspase	F	L	84	275	FALSE	14.968	15.729
	CD14	Caspase	F	L	84	276	FALSE	15.866	16.546
	CD14	Caspase	F	R	85	277	TRUE	0	2.442
	CD14	Caspase	F	R	85	278	FALSE	7.069	7.826
	CD14	Caspase	F	R	85	279	FALSE	7.901	8.119
	CD14	Caspase	F	L	86	280	TRUE	0	1.635
	CD14	Caspase	F	L	86	281	FALSE	11.871	12.43
	CD14	Caspase	F	R	87	282	TRUE	0	2.158
	CD14	Caspase	F	R	87	283	FALSE	9.321	10.306
	CD14	Caspase	F	R	87	284	FALSE	10.425	11.609
	CD14	Caspase	F	L	88	285	TRUE	0	1.876
	CD14	Caspase	F	R	89	286	TRUE	0	1.8
	CD14	Caspase	F	R	89	287	FALSE	12.552	12.901
	CD14	Caspase	F	L	90	288	TRUE	0	2.235
	CD14	Caspase	F	L	90	289	FALSE	14.123	14.714
	CD14	Caspase	F	L	90	290	FALSE	15.22	15.394
	CD14	Caspase	F	R	91	291	TRUE	0	1.921
	CD14	Caspase	F	R	91	292	FALSE	3.342	4.028
	CD14	Caspase	F	R	91	293	FALSE	4.142	4.788
	CD14	Caspase	F	R	91	294	FALSE	66.419	67.255
	CD14	Caspase	F	L	92	295	TRUE	0	1.72
	CD14	Caspase	F	L	92	296	TRUE	8.992	11.173
	CD14	Caspase	F	R	93	297	TRUE	0	2.581
	CD14	Caspase	F	R	93	298	FALSE	3.78	3.962
	CD14	Caspase	F	R	93	299	FALSE	4.018	4.373
	CD14	Caspase	F	L	94	300	TRUE	0	2.327
	CD14	Caspase	F	L	94	301	FALSE	2.539	2.743
	CD14	Caspase	F	L	94	302	FALSE	13.008	13.486
	CD14	Caspase	F	L	94	303	FALSE	23.548	24.104
	CD14	Caspase	F	R	95	304	TRUE	0	1.804
	CD14	Caspase	F	L	96	305	TRUE	0	2.204
	CD14	Caspase	F	L	96	306	FALSE	2.329	2.776
	CD14	Caspase	F	R	97	307	TRUE	0	2.618
	CD14	Caspase	F	R	97	308	FALSE	4.83	5.687
	CD14	Caspase	F	L	98	309	TRUE	0	2.563
	CD14	Caspase	F	L	98	310	FALSE	3.976	4.728
	CD14	Caspase	F	L	98	311	FALSE	9.753	10.11
	CD14	Caspase	F	R	99	312	TRUE	0	2.244
	CD14	Caspase	F	R	99	313	FALSE	3.633	4.222
	CD14	Caspase	F	R	99	314	FALSE	30.033	30.815
	CD14	Caspase	F	L	100	315	TRUE	0	1.559
	CD14	Caspase	F	R	101	316	TRUE	0	1.975
	CD14	Caspase	F	R	101	317	FALSE	9.633	10.707
	CD14	Caspase	F	R	101	318	FALSE	25.794	27.434
	CD14	Caspase	F	L	102	319	TRUE	0	2.096
	CD14	Caspase	F	R	103	320	TRUE	0	1.644
	CD14	Caspase	F	R	103	321	FALSE	7.317	8.483
	CD14	Caspase	F	L	104	322	TRUE	0	1.938
	CD15	Caspase	F	L	1	1	FALSE	0	1.664
	CD15	Caspase	F	L	1	2	FALSE	1.71	3.541
	CD15	Caspase	F	R	2	3	TRUE	0	2.006
	CD15	Caspase	F	R	2	4	FALSE	2.26	4.031
	CD15	Caspase	F	R	2	5	FALSE	42.75	43.755
	CD15	Caspase	F	R	2	6	FALSE	43.887	45.938
	CD15	Caspase	F	L	3	7	TRUE	0	4.483
	CD15	Caspase	F	R	4	8	TRUE	0	2.6
	CD15	Caspase	F	L	5	9	FALSE	0	1.386
	CD15	Caspase	F	R	6	10	TRUE	0	0.393
	CD15	Caspase	F	R	6	11	FALSE	3.186	4.999
	CD15	Caspase	F	L	7	12	TRUE	0	1.273
	CD15	Caspase	F	R	8	13	TRUE	0	0.797
	CD15	Caspase	F	R	8	14	FALSE	16.219	17.628
	CD15	Caspase	F	R	8	15	FALSE	36.474	36.677
	CD15	Caspase	F	R	8	16	FALSE	36.749	37.234
	CD15	Caspase	F	R	8	17	FALSE	69.819	71.501
	CD15	Caspase	F	L	9	18	TRUE	0	3.643
	CD15	Caspase	F	L	9	19	FALSE	9.232	9.918
	CD15	Caspase	F	R	10	20	TRUE	0	0.182
	CD15	Caspase	F	L	11	21	TRUE	0	0.92
	CD15	Caspase	F	R	12	22	TRUE	0	2.34
	CD15	Caspase	F	R	12	23	FALSE	2.47	4.411
	CD15	Caspase	F	R	12	24	FALSE	4.486	4.919
	CD15	Caspase	F	R	12	25	FALSE	13.513	14.495
	CD15	Caspase	F	L	13	26	TRUE	0	0.455
	CD15	Caspase	F	L	13	27	FALSE	0.538	0.913
	CD15	Caspase	F	L	13	28	FALSE	1.825	2.309
	CD15	Caspase	F	R	14	29	TRUE	0	2.731
	CD15	Caspase	F	R	14	30	FALSE	6.18	7.734
	CD15	Caspase	F	L	15	31	TRUE	0	1.326
	CD15	Caspase	F	L	15	32	FALSE	2.009	2.22
	CD15	Caspase	F	L	15	33	FALSE	2.243	2.439
	CD15	Caspase	F	L	15	34	FALSE	2.629	4.027
	CD15	Caspase	F	L	15	35	FALSE	4.213	4.916
	CD15	Caspase	F	L	15	36	FALSE	8.121	9.214
	CD15	Caspase	F	L	15	37	FALSE	10.161	10.552
	CD15	Caspase	F	R	16	38	TRUE	0	1.488
	CD15	Caspase	F	R	16	39	FALSE	1.916	2.255
	CD15	Caspase	F	R	16	40	FALSE	2.299	4.443
	CD15	Caspase	F	L	17	41	TRUE	0	1.824
	CD15	Caspase	F	L	17	42	FALSE	1.939	3.128
	CD15	Caspase	F	R	18	43	TRUE	0	0.429
	CD15	Caspase	F	R	18	44	FALSE	1.428	3.344
	CD15	Caspase	F	R	18	45	FALSE	4.524	5.191
	CD15	Caspase	F	L	19	46	TRUE	0	3.24
	CD15	Caspase	F	L	19	47	FALSE	3.88	4.905
	CD15	Caspase	F	L	19	48	FALSE	4.925	5.238
	CD15	Caspase	F	L	19	49	FALSE	9.235	10.12
	CD15	Caspase	F	R	20	50	TRUE	0	1.655
	CD15	Caspase	F	R	20	51	FALSE	3.857	4.643
[truncated: 2,743 more rows]

## Sheet: Virus_TrialData
Pre-processed data	MouseID	Virus	Sex	Side	Streak	Num_pokes	LogDuration
	CD02	tdTomato	M	L	1	1	-0.145694
	CD02	tdTomato	M	R	2	3	1.65723
	CD02	tdTomato	M	L	3	6	1.52231
	CD02	tdTomato	M	R	4	4	0.862489
	CD02	tdTomato	M	L	5	2	0.616265
	CD02	tdTomato	M	R	6	5	1.12623
	CD02	tdTomato	M	L	7	1	-0.0315171
	CD02	tdTomato	M	R	8	1	-0.616185
	CD02	tdTomato	M	L	9	7	2.17257
	CD02	tdTomato	M	R	10	7	1.36101
	CD02	tdTomato	M	L	11	4	1.86581
	CD02	tdTomato	M	R	12	4	1.90963
	CD02	tdTomato	M	L	13	1	0.0476642
	CD02	tdTomato	M	R	14	5	1.25539
	CD02	tdTomato	M	L	15	8	1.867
	CD02	tdTomato	M	R	16	2	0.828724
	CD02	tdTomato	M	L	17	1	0.429429
	CD02	tdTomato	M	R	18	4	1.45122
	CD02	tdTomato	M	L	19	1	0.0358298
	CD02	tdTomato	M	R	20	1	0.191451
	CD02	tdTomato	M	L	21	3	1.14746
	CD02	tdTomato	M	R	22	4	2.28897
	CD02	tdTomato	M	L	23	2	0.83123
	CD02	tdTomato	M	R	24	3	0.924124
	CD02	tdTomato	M	L	25	3	0.966236
	CD02	tdTomato	M	R	26	8	2.38862
	CD02	tdTomato	M	L	27	4	0.868586
	CD02	tdTomato	M	R	28	5	1.63774
	CD02	tdTomato	M	L	29	7	1.97906
	CD02	tdTomato	M	R	30	2	0.646011
	CD02	tdTomato	M	L	31	4	2.24193
	CD02	tdTomato	M	R	32	2	1.09715
	CD02	tdTomato	M	L	33	7	1.83546
	CD02	tdTomato	M	R	34	4	2.34324
	CD04	tdTomato	F	L	1	1	-0.712198
	CD04	tdTomato	F	R	2	6	2.34415
	CD04	tdTomato	F	L	3	3	1.89787
	CD04	tdTomato	F	R	4	5	1.90265
	CD04	tdTomato	F	L	5	5	1.49407
	CD04	tdTomato	F	R	6	1	0.278754
	CD04	tdTomato	F	L	7	2	0.429429
	CD04	tdTomato	F	R	8	6	1.03439
	CD04	tdTomato	F	L	9	4	1.03961
	CD04	tdTomato	F	R	10	2	1.41214
	CD04	tdTomato	F	L	11	3	1.68742
	CD04	tdTomato	F	R	12	6	1.74981
	CD04	tdTomato	F	L	13	3	1.77082
	CD04	tdTomato	F	R	14	1	0.325926
	CD04	tdTomato	F	L	15	1	0.201397
	CD04	tdTomato	F	R	16	3	0.895367
	CD04	tdTomato	F	L	17	7	0.975524
	CD04	tdTomato	F	R	18	2	0.623146
	CD04	tdTomato	F	L	19	2	0.825036
	CD04	tdTomato	F	R	20	5	1.44668
	CD04	tdTomato	F	L	21	2	1.39365
	CD04	tdTomato	F	R	22	2	0.553033
	CD04	tdTomato	F	L	23	1	-0.576754
	CD04	tdTomato	F	R	24	1	0.458638
	CD04	tdTomato	F	L	25	1	0.4133
	CD04	tdTomato	F	R	26	4	1.05061
	CD04	tdTomato	F	L	27	4	1.84425
	CD04	tdTomato	F	R	28	2	0.7577
	CD04	tdTomato	F	L	29	1	0.355643
	CD04	tdTomato	F	R	30	1	0.5302
	CD04	tdTomato	F	L	31	3	0.863442
	CD04	tdTomato	F	R	32	2	0.613207
	CD04	tdTomato	F	L	33	5	1.53559
	CD04	tdTomato	F	R	34	5	1.66709
	CD04	tdTomato	F	L	35	1	-0.156767
	CD04	tdTomato	F	R	36	1	0.460447
	CD04	tdTomato	F	L	37	1	0.0820669
	CD04	tdTomato	F	R	38	4	1.29449
	CD04	tdTomato	F	L	39	3	1.39836
	CD04	tdTomato	F	R	40	5	1.88562
	CD04	tdTomato	F	L	41	3	1.91125
	CD04	tdTomato	F	R	42	1	-0.0798767
	CD04	tdTomato	F	L	43	3	0.907465
	CD04	tdTomato	F	R	44	4	1.40717
	CD04	tdTomato	F	L	45	2	0.680879
	CD04	tdTomato	F	R	46	2	0.918659
	CD04	tdTomato	F	L	47	1	0.448552
	CD04	tdTomato	F	R	48	3	1.14088
	CD04	tdTomato	F	L	49	5	1.45066
	CD04	tdTomato	F	R	50	3	1.73506
	CD04	tdTomato	F	L	51	2	0.156246
	CD04	tdTomato	F	R	52	1	0.239049
	CD04	tdTomato	F	L	53	2	0.904445
	CD04	tdTomato	F	R	54	2	1.43624
	CD04	tdTomato	F	L	55	1	0.178113
	CD04	tdTomato	F	R	56	1	0.205746
	CD04	tdTomato	F	L	57	4	1.07074
	CD04	tdTomato	F	R	58	2	1.50224
	CD04	tdTomato	F	L	59	1	0.242044
	CD04	tdTomato	F	R	60	1	0.402949
	CD04	tdTomato	F	L	61	2	0.290035
	CD04	tdTomato	F	R	62	5	1.17487
	CD04	tdTomato	F	L	63	2	0.741546
	CD04	tdTomato	F	R	64	2	0.920801
	CD04	tdTomato	F	L	65	2	0.539829
	CD04	tdTomato	F	R	66	9	2.56848
	CD04	tdTomato	F	L	67	2	0.418798
	CD04	tdTomato	F	R	68	4	1.98104
	CD04	tdTomato	F	L	69	1	0.00817418
	CD04	tdTomato	F	R	70	1	0.401573
	CD04	tdTomato	F	L	71	2	0.979867
	CD04	tdTomato	F	R	72	1	0.504607
	CD04	tdTomato	F	L	73	1	0.214844
	CD04	tdTomato	F	R	74	5	1.61524
	CD04	tdTomato	F	L	75	2	0.528402
	CD04	tdTomato	F	R	76	4	0.942207
	CD04	tdTomato	F	L	77	1	0.305351
	CD04	tdTomato	F	R	78	1	0.170555
	CD06	Caspase	M	R	1	4	0.806587
	CD06	Caspase	M	L	2	3	1.02193
	CD06	Caspase	M	R	3	4	0.866051
	CD06	Caspase	M	L	4	5	1.3996
	CD06	Caspase	M	R	5	1	0.0457141
	CD06	Caspase	M	L	6	3	1.52111
	CD06	Caspase	M	R	7	1	0.356217
	CD06	Caspase	M	L	8	4	1.32785
	CD06	Caspase	M	R	9	3	1.51626
	CD06	Caspase	M	L	10	4	1.07915
	CD06	Caspase	M	R	11	3	1.05185
	CD06	Caspase	M	L	12	2	0.598024
	CD06	Caspase	M	R	13	3	0.639188
	CD06	Caspase	M	L	14	5	0.654369
	CD06	Caspase	M	R	15	9	1.78796
	CD06	Caspase	M	L	16	3	1.26105
	CD06	Caspase	M	R	17	1	0.447003
	CD06	Caspase	M	L	18	3	0.993304
	CD06	Caspase	M	R	19	2	1.12804
	CD06	Caspase	M	L	20	4	1.52881
	CD06	Caspase	M	R	21	3	0.531734
	CD06	Caspase	M	L	22	5	1.78828
	CD06	Caspase	M	R	23	1	0.308137
	CD06	Caspase	M	L	24	3	0.869935
	CD06	Caspase	M	R	25	3	1.10731
	CD06	Caspase	M	L	26	3	1.09562
	CD06	Caspase	M	R	27	6	1.63437
	CD06	Caspase	M	L	28	1	0.34557
	CD06	Caspase	M	R	29	2	1.08436
	CD06	Caspase	M	L	30	1	0.376759
	CD06	Caspase	M	R	31	2	0.703291
	CD06	Caspase	M	L	32	3	0.647774
	CD06	Caspase	M	R	33	2	0.725422
	CD06	Caspase	M	L	34	3	0.856427
	CD06	Caspase	M	R	35	1	0.00130093
	CD06	Caspase	M	L	36	3	1.03723
	CD06	Caspase	M	R	37	2	0.415974
	CD06	Caspase	M	L	38	3	0.688331
	CD06	Caspase	M	R	39	3	0.717421
	CD06	Caspase	M	L	40	4	1.29243
	CD06	Caspase	M	R	41	2	0.996555
	CD06	Caspase	M	L	42	4	0.797406
	CD06	Caspase	M	R	43	4	0.742882
	CD06	Caspase	M	L	44	1	0.357935
	CD06	Caspase	M	R	45	3	0.745543
	CD06	Caspase	M	L	46	2	0.760799
	CD06	Caspase	M	R	47	1	0.241546
	CD06	Caspase	M	L	48	1	0.367729
	CD06	Caspase	M	R	49	5	1.49516
	CD06	Caspase	M	L	50	1	0.250908
	CD06	Caspase	M	R	51	1	0.290925
	CD06	Caspase	M	L	52	3	1.04599
	CD06	Caspase	M	R	53	2	0.801747
	CD06	Caspase	M	L	54	1	0.371806
	CD06	Caspase	M	R	55	1	0.29048
	CD06	Caspase	M	L	56	1	-0.0118872
	CD06	Caspase	M	R	57	1	0.149527
	CD06	Caspase	M	L	58	1	0.312389
	CD06	Caspase	M	R	59	3	0.962132
	CD06	Caspase	M	L	60	2	0.951532
	CD06	Caspase	M	R	61	2	1.48615
	CD06	Caspase	M	L	62	3	0.946501
	CD06	Caspase	M	R	63	5	1.22799
	CD06	Caspase	M	L	64	2	1.00775
	CD06	Caspase	M	R	65	1	0.22917
	CD06	Caspase	M	L	66	1	-0.135489
	CD06	Caspase	M	R	67	1	-0.101824
	CD06	Caspase	M	L	68	3	1.53432
	CD06	Caspase	M	R	69	2	0.661529
	CD06	Caspase	M	L	70	4	1.00685
	CD06	Caspase	M	R	71	2	1.19346
	CD06	Caspase	M	L	72	3	1.20634
	CD06	Caspase	M	R	73	1	0.455606
	CD06	Caspase	M	L	74	1	0.33626
	CD06	Caspase	M	R	75	1	0.440594
	CD06	Caspase	M	L	76	1	0.111599
	CD06	Caspase	M	R	77	2	0.634578
	CD06	Caspase	M	L	78	1	0.34811
	CD06	Caspase	M	R	79	1	0.395676
	CD06	Caspase	M	L	80	2	0.657343
	CD06	Caspase	M	R	81	3	1.10065
	CD06	Caspase	M	L	82	3	1.02276
	CD06	Caspase	M	R	83	2	0.329398
	CD06	Caspase	M	L	84	1	0.111934
	CD06	Caspase	M	R	85	2	1.21021
	CD06	Caspase	M	L	86	1	0.356599
	CD06	Caspase	M	R	87	2	0.936665
	CD06	Caspase	M	L	88	2	0.67385
	CD06	Caspase	M	R	89	2	1.60114
	CD06	Caspase	M	L	90	1	-0.10513
	CD06	Caspase	M	R	91	2	0.69055
	CD06	Caspase	M	L	92	2	0.568436
	CD06	Caspase	M	R	93	1	0.333246
	CD06	Caspase	M	L	94	1	0.193125
	CD06	Caspase	M	R	95	3	1.81836
	CD06	Caspase	M	L	96	3	1.2931
	CD06	Caspase	M	R	97	2	1.42856
	CD06	Caspase	M	L	98	1	0.272538
	CD06	Caspase	M	R	99	2	0.654273
	CD06	Caspase	M	L	100	2	1.01254
	CD06	Caspase	M	R	101	4	1.38775
	CD06	Caspase	M	L	102	10	1.61739
	CD06	Caspase	M	R	103	1	0.271842
	CD06	Caspase	M	L	104	1	0.140194
	CD06	Caspase	M	R	105	2	0.382917
	CD06	Caspase	M	L	106	3	1.63481
	CD06	Caspase	M	R	107	2	0.753889
	CD06	Caspase	M	L	108	4	1.79427
	CD06	Caspase	M	R	109	1	0.305996
	CD06	Caspase	M	L	110	1	-0.675718
	CD06	Caspase	M	R	111	1	0.310906
	CD06	Caspase	M	L	112	2	0.957559
	CD06	Caspase	M	R	113	1	0.28892
	CD06	Caspase	M	L	114	2	0.626853
	CD06	Caspase	M	R	115	4	1.06326
	CD06	Caspase	M	L	116	1	0.23096
	CD06	Caspase	M	R	117	3	0.806926
	CD06	Caspase	M	L	118	6	1.5232
	CD06	Caspase	M	R	119	1	0.371806
	CD06	Caspase	M	L	120	1	0.363612
	CD06	Caspase	M	R	121	3	0.968996
	CD06	Caspase	M	L	122	3	1.36974
	CD06	Caspase	M	R	123	2	1.74126
	CD06	Caspase	M	L	124	1	-0.419075
	CD06	Caspase	M	R	125	1	0.169086
	CD06	Caspase	M	L	126	4	1.32834
	CD06	Caspase	M	R	127	1	0.291813
	CD06	Caspase	M	L	128	5	1.73381
	CD06	Caspase	M	R	129	2	0.58816
	CD06	Caspase	M	L	130	1	0.286007
	CD06	Caspase	M	R	131	2	1.21259
	CD06	Caspase	M	L	132	3	1.4143
	CD06	Caspase	M	R	133	2	1.06221
	CD06	Caspase	M	L	134	1	0.276002
	CD06	Caspase	M	R	135	1	-0.126679
	CD06	Caspase	M	L	136	2	1.59683
	CD06	Caspase	M	R	137	1	-0.946922
	CD06	Caspase	M	L	138	5	0.956265
	CD06	Caspase	M	R	139	1	0.34183
	CD06	Caspase	M	L	140	1	0.106871
	CD06	Caspase	M	R	141	3	1.31178
	CD06	Caspase	M	L	142	5	2.15352
	CD10	Caspase	M	R	1	1	-0.334419
	CD10	Caspase	M	L	2	5	1.1782
	CD10	Caspase	M	R	3	7	1.4481
	CD10	Caspase	M	L	4	3	0.741309
	CD10	Caspase	M	R	5	1	0.00603795
	CD10	Caspase	M	L	6	3	1.25804
	CD10	Caspase	M	R	7	2	0.378398
	CD10	Caspase	M	L	8	2	0.58625
	CD10	Caspase	M	R	9	2	0.101059
	CD10	Caspase	M	L	10	1	0.272306
	CD10	Caspase	M	R	11	2	0.720986
	CD10	Caspase	M	L	12	4	1.02485
	CD10	Caspase	M	R	13	2	0.966048
	CD10	Caspase	M	L	14	8	1.19396
	CD10	Caspase	M	R	15	1	0.237041
	CD10	Caspase	M	L	16	14	1.40264
	CD10	Caspase	M	R	17	4	1.84972
	CD10	Caspase	M	L	18	13	1.88714
	CD10	Caspase	M	R	19	1	0.325926
	CD10	Caspase	M	L	20	12	1.34866
	CD10	Caspase	M	R	21	2	0.600319
	CD10	Caspase	M	L	22	10	1.33538
	CD10	Caspase	M	R	23	2	0.563244
	CD10	Caspase	M	L	24	7	0.991625
	CD10	Caspase	M	R	25	3	1.3626
	CD10	Caspase	M	L	26	21	1.55467
	CD10	Caspase	M	R	27	1	0.239299
	CD10	Caspase	M	L	28	3	1.28921
	CD10	Caspase	M	R	29	2	0.290257
	CD10	Caspase	M	L	30	13	1.64271
	CD10	Caspase	M	R	31	1	0.196453
	CD10	Caspase	M	L	32	4	1.01574
	CD10	Caspase	M	R	33	1	0.09691
	CD10	Caspase	M	L	34	15	1.2349
	CD10	Caspase	M	R	35	2	0.417472
	CD10	Caspase	M	L	36	15	1.92608
	CD10	Caspase	M	R	37	4	1.3236
	CD10	Caspase	M	L	38	3	0.573104
	CD10	Caspase	M	R	39	1	0.0519239
	CD10	Caspase	M	L	40	5	0.919601
	CD10	Caspase	M	R	41	9	1.43921
	CD10	Caspase	M	L	42	1	0.465977
	CD10	Caspase	M	R	43	1	0.344785
	CD10	Caspase	M	L	44	4	0.763503
	CD10	Caspase	M	R	45	4	0.928037
	CD10	Caspase	M	L	46	8	1.81391
	CD10	Caspase	M	R	47	3	0.684037
	CD10	Caspase	M	L	48	11	2.03509
	CD10	Caspase	M	R	49	1	0.346157
	CD10	Caspase	M	L	50	4	1.37049
	CD10	Caspase	M	R	51	4	0.859318
	CD10	Caspase	M	L	52	4	1.12463
	CD10	Caspase	M	R	53	5	1.44245
	CD10	Caspase	M	L	54	1	0.206826
	CD10	Caspase	M	R	55	1	0.218273
	CD10	Caspase	M	L	56	3	0.825621
	CD10	Caspase	M	R	57	3	1.07151
	CD10	Caspase	M	L	58	10	1.21885
	CD10	Caspase	M	R	59	2	0.518777
	CD10	Caspase	M	L	60	1	0.361539
	CD10	Caspase	M	R	61	3	0.999174
	CD10	Caspase	M	L	62	4	1.07657
	CD10	Caspase	M	R	63	1	0.246499
	CD10	Caspase	M	L	64	2	1.0786
	CD10	Caspase	M	R	65	1	0.382737
	CD10	Caspase	M	L	66	3	0.863085
	CD10	Caspase	M	R	67	2	0.805976
	CD10	Caspase	M	L	68	10	1.5896
	CD10	Caspase	M	R	69	4	1.24217
	CD10	Caspase	M	L	70	1	0.243038
	CD10	Caspase	M	R	71	1	0.35141
	CD10	Caspase	M	L	72	1	0.385964
	CD10	Caspase	M	R	73	1	0.0920185
	CD10	Caspase	M	L	74	1	0.324694
	CD10	Caspase	M	R	75	1	0.0993353
	CD10	Caspase	M	L	76	2	0.711976
	CD10	Caspase	M	R	77	1	0.630631
	CD10	Caspase	M	L	78	6	1.74187
	CD10	Caspase	M	R	79	1	0.275081
	CD10	Caspase	M	L	80	2	0.816904
	CD10	Caspase	M	R	81	3	0.975202
	CD10	Caspase	M	L	82	15	1.71241
	CD10	Caspase	M	R	83	2	0.439333
	CD10	Caspase	M	L	84	1	0.302331
	CD10	Caspase	M	R	85	1	0.101403
	CD10	Caspase	M	L	86	3	1.32015
	CD10	Caspase	M	R	87	3	1.32919
	CD10	Caspase	M	L	88	1	0.507721
	CD10	Caspase	M	R	89	4	2.00169
	CD10	Caspase	M	L	90	8	1.11949
	CD10	Caspase	M	R	91	2	0.61066
	CD10	Caspase	M	L	92	2	0.869584
	CD10	Caspase	M	R	93	2	0.604766
	CD10	Caspase	M	L	94	4	0.946894
	CD10	Caspase	M	R	95	2	0.863442
	CD10	Caspase	M	L	96	4	0.931
	CD10	Caspase	M	R	97	2	0.916138
	CD10	Caspase	M	L	98	2	1.56608
	CD10	Caspase	M	R	99	3	1.33218
	CD10	Caspase	M	L	100	1	0.27738
	CD10	Caspase	M	R	101	1	-0.312471
	CD10	Caspase	M	L	102	3	1.35209
	CD10	Caspase	M	R	103	1	0.398981
	CD10	Caspase	M	L	104	1	0.0700379
	CD10	Caspase	M	R	105	1	-0.250264
	CD10	Caspase	M	L	106	1	0.193681
	CD10	Caspase	M	R	107	1	0.311542
	CD10	Caspase	M	L	108	2	1.13631
	CD10	Caspase	M	R	109	1	0.387212
	CD10	Caspase	M	L	110	1	0.338656
	CD10	Caspase	M	R	111	2	0.884399
	CD10	Caspase	M	L	112	3	0.815843
	CD10	Caspase	M	R	113	4	1.8142
	CD10	Caspase	M	L	114	2	1.38867
	CD10	Caspase	M	R	115	2	1.61196
	CD10	Caspase	M	L	116	1	0.0161974
	CD10	Caspase	M	R	117	1	0.344392
	CD10	Caspase	M	L	118	1	0.288026
	CD10	Caspase	M	R	119	3	1.31919
	CD10	Caspase	M	L	120	1	0.2398
	CD10	Caspase	M	R	121	3	1.17978
	CD10	Caspase	M	L	122	5	1.22383
	CD11	Caspase	F	L	1	1	-0.400117
	CD11	Caspase	F	R	2	5	0.720407
	CD11	Caspase	F	L	3	6	1.99717
	CD11	Caspase	F	R	4	3	1.06371
	CD11	Caspase	F	L	5	8	1.74098
	CD11	Caspase	F	R	6	1	0.814314
	CD11	Caspase	F	L	7	1	0.187521
	CD11	Caspase	F	R	8	2	0.760649
	CD11	Caspase	F	L	9	6	2.1092
	CD11	Caspase	F	R	10	2	0.607241
	CD11	Caspase	F	L	11	7	1.4821
	CD11	Caspase	F	R	12	2	1.02991
	CD11	Caspase	F	L	13	1	0.418135
	CD11	Caspase	F	R	14	1	0.303196
	CD11	Caspase	F	L	15	1	-0.712198
	CD11	Caspase	F	R	16	2	0.474799
	CD11	Caspase	F	L	17	3	1.56908
	CD11	Caspase	F	R	18	4	1.60486
	CD11	Caspase	F	L	19	4	1.14264
	CD11	Caspase	F	R	20	2	1.43624
	CD11	Caspase	F	L	21	2	0.709694
	CD11	Caspase	F	R	22	3	1.48992
	CD11	Caspase	F	L	23	3	0.729084
	CD11	Caspase	F	R	24	1	0.243286
	CD11	Caspase	F	L	25	2	0.656002
	CD11	Caspase	F	R	26	3	1.66427
	CD11	Caspase	F	L	27	8	1.8192
	CD11	Caspase	F	R	28	2	1.74914
	CD11	Caspase	F	L	29	10	2.28931
	CD11	Caspase	F	R	30	4	1.32249
	CD11	Caspase	F	L	31	3	2.1041
	CD11	Caspase	F	R	32	6	1.84555
	CD11	Caspase	F	L	33	3	1.33143
	CD11	Caspase	F	R	34	6	1.43586
	CD11	Caspase	F	L	35	4	1.34943
	CD11	Caspase	F	R	36	3	0.932068
	CD11	Caspase	F	L	37	2	0.645521
	CD11	Caspase	F	R	38	4	0.984122
	CD11	Caspase	F	L	39	1	0.671636
	CD11	Caspase	F	R	40	1	0.188647
	CD11	Caspase	F	L	41	1	0.358506
	CD11	Caspase	F	R	42	2	0.602603
	CD11	Caspase	F	L	43	2	1.37357
	CD11	Caspase	F	R	44	3	1.54499
	CD11	Caspase	F	L	45	2	0.736157
	CD11	Caspase	F	R	46	2	1.58448
	CD11	Caspase	F	L	47	2	0.751125
	CD11	Caspase	F	R	48	2	0.721068
	CD11	Caspase	F	L	49	2	1.60893
	CD11	Caspase	F	R	50	1	0.503382
	CD11	Caspase	F	L	51	3	1.81197
	CD11	Caspase	F	R	52	4	2.52253
	CD11	Caspase	F	L	53	1	-0.380907
	CD11	Caspase	F	R	54	2	1.95242
	CD11	Caspase	F	L	55	2	1.70302
	CD11	Caspase	F	R	56	1	-0.206908
	CD11	Caspase	F	L	57	1	0.640481
	CD11	Caspase	F	R	58	2	1.99213
	CD11	Caspase	F	L	59	2	1.0122
	CD11	Caspase	F	R	60	1	-0.551294
	CD11	Caspase	F	L	61	3	1.74486
	CD11	Caspase	F	R	62	1	-0.522879
	CD11	Caspase	F	L	63	2	1.52214
	CD13	Caspase	M	L	1	2	1.49613
	CD13	Caspase	M	R	2	2	0.727785
	CD13	Caspase	M	L	3	2	0.0788192
	CD13	Caspase	M	R	4	1	0.428783
	CD13	Caspase	M	L	5	5	1.38335
	CD13	Caspase	M	R	6	2	0.585686
	CD13	Caspase	M	L	7	7	1.86328
	CD13	Caspase	M	R	8	7	1.61071
	CD13	Caspase	M	L	9	7	1.40056
	CD13	Caspase	M	R	10	3	0.770557
	CD13	Caspase	M	L	11	6	1.22113
	CD13	Caspase	M	R	12	5	1.39475
	CD13	Caspase	M	L	13	4	1.01334
	CD13	Caspase	M	R	14	4	0.982678
	CD13	Caspase	M	L	15	2	1.41764
	CD13	Caspase	M	R	16	4	1.59787
	CD13	Caspase	M	L	17	5	1.24249
	CD13	Caspase	M	R	18	4	1.26505
	CD13	Caspase	M	L	19	1	0.403807
	CD13	Caspase	M	R	20	1	0.609381
	CD13	Caspase	M	L	21	2	1.56417
	CD13	Caspase	M	R	22	4	1.78816
	CD13	Caspase	M	L	23	3	1.90949
	CD13	Caspase	M	R	24	2	0.543571
	CD13	Caspase	M	L	25	7	1.77509
	CD13	Caspase	M	R	26	3	1.15625
	CD13	Caspase	M	L	27	9	1.53056
	CD13	Caspase	M	R	28	7	1.02653
	CD13	Caspase	M	L	29	1	-0.229885
	CD13	Caspase	M	R	30	2	0.744058
	CD13	Caspase	M	L	31	3	1.14724
	CD13	Caspase	M	R	32	7	1.57777
	CD13	Caspase	M	L	33	7	1.77889
	CD13	Caspase	M	R	34	15	1.60734
	CD13	Caspase	M	L	35	4	1.56992
	CD13	Caspase	M	R	36	3	0.753277
	CD13	Caspase	M	L	37	8	2.11083
	CD13	Caspase	M	R	38	4	1.71623
	CD13	Caspase	M	L	39	11	1.49361
	CD13	Caspase	M	R	40	7	1.8652
	CD13	Caspase	M	L	41	1	0.00902574
	CD13	Caspase	M	R	42	2	0.808143
	CD13	Caspase	M	L	43	1	0.567614
	CD13	Caspase	M	R	44	1	0.380573
	CD13	Caspase	M	L	45	7	1.02751
	CD13	Caspase	M	R	46	4	1.46758
	CD13	Caspase	M	L	47	2	0.57461
	CD13	Caspase	M	R	48	2	1.07882
	CD13	Caspase	M	L	49	3	0.73759
	CD13	Caspase	M	R	50	4	1.11588
	CD13	Caspase	M	L	51	9	1.50207
	CD13	Caspase	M	R	52	4	1.35799
	CD13	Caspase	M	L	53	3	1.06058
	CD13	Caspase	M	R	54	1	0.390582
	CD13	Caspase	M	L	55	3	0.982452
	CD13	Caspase	M	R	56	3	1.09771
	CD13	Caspase	M	L	57	3	0.796227
	CD13	Caspase	M	R	58	3	0.777499
	CD13	Caspase	M	L	59	2	0.675962
	CD13	Caspase	M	R	60	3	1.36633
	CD13	Caspase	M	L	61	2	0.885305
	CD13	Caspase	M	R	62	3	1.39637
	CD13	Caspase	M	L	63	1	0.453777
	CD13	Caspase	M	R	64	2	0.645815
	CD13	Caspase	M	L	65	2	0.758912
	CD13	Caspase	M	R	66	2	0.590061
	CD13	Caspase	M	L	67	2	1.45529
	CD13	Caspase	M	R	68	2	1.4683
	CD13	Caspase	M	L	69	1	0.555457
	CD13	Caspase	M	R	70	2	0.77041
	CD13	Caspase	M	L	71	2	1.07802
	CD13	Caspase	M	R	72	2	0.834993
	CD13	Caspase	M	L	73	4	1.01106
	CD13	Caspase	M	R	74	2	0.646502
	CD13	Caspase	M	L	75	5	1.07936
	CD13	Caspase	M	R	76	2	0.651666
	CD13	Caspase	M	L	77	2	0.623766
	CD13	Caspase	M	R	78	2	0.993745
	CD13	Caspase	M	L	79	8	1.24257
	CD13	Caspase	M	R	80	4	1.36795
	CD13	Caspase	M	L	81	1	0.415474
	CD13	Caspase	M	R	82	1	0.375664
	CD13	Caspase	M	L	83	1	-0.0958256
	CD13	Caspase	M	R	84	1	0.357935
	CD13	Caspase	M	L	85	2	1.15409
	CD13	Caspase	M	R	86	2	1.04379
	CD13	Caspase	M	L	87	1	0.260787
	CD13	Caspase	M	R	88	2	0.933133
	CD13	Caspase	M	L	89	4	0.823996
	CD13	Caspase	M	R	90	2	1.02197
	CD13	Caspase	M	L	91	3	0.820989
	CD13	Caspase	M	R	92	3	1.28001
	CD13	Caspase	M	L	93	4	0.931966
	CD13	Caspase	M	R	94	2	0.882411
	CD13	Caspase	M	L	95	2	0.843046
	CD13	Caspase	M	R	96	1	0.392873
	CD13	Caspase	M	L	97	2	1.20658
	CD13	Caspase	M	R	98	1	0.395326
	CD13	Caspase	M	L	99	1	0.37767
	CD13	Caspase	M	R	100	4	1.7301
	CD13	Caspase	M	L	101	3	1.27168
	CD14	Caspase	F	R	1	6	1.65431
	CD14	Caspase	F	L	2	8	1.86111
	CD14	Caspase	F	R	3	2	1.58667
	CD14	Caspase	F	L	4	1	0.265525
	CD14	Caspase	F	R	5	1	0.197281
	CD14	Caspase	F	L	6	2	-0.110698
	CD14	Caspase	F	R	7	2	0.96539
	CD14	Caspase	F	L	8	4	1.14715
	CD14	Caspase	F	R	9	1	0.140822
	CD14	Caspase	F	L	10	6	1.98319
	CD14	Caspase	F	R	11	6	2.06206
	CD14	Caspase	F	L	12	5	1.03567
	CD14	Caspase	F	R	13	1	0.645226
	CD14	Caspase	F	L	14	3	1.75122
	CD14	Caspase	F	R	15	8	1.27515
	CD14	Caspase	F	L	16	5	1.25532
	CD14	Caspase	F	R	17	5	1.62565
	CD14	Caspase	F	L	18	3	0.999913
	CD14	Caspase	F	R	19	8	1.31804
	CD14	Caspase	F	L	20	2	1.26269
	CD14	Caspase	F	R	21	1	0.614897
	CD14	Caspase	F	L	22	6	1.09216
	CD14	Caspase	F	R	23	6	1.07969
	CD14	Caspase	F	L	24	6	1.75242
	CD14	Caspase	F	R	25	3	0.764848
	CD14	Caspase	F	L	26	2	0.232742
	CD14	Caspase	F	R	27	2	0.802842
	CD14	Caspase	F	L	28	1	0.36661
	CD14	Caspase	F	R	29	2	1.14774
	CD14	Caspase	F	L	30	3	0.871748
	CD14	Caspase	F	R	31	2	0.82256
	CD14	Caspase	F	L	32	1	0.574031
	CD14	Caspase	F	R	33	3	0.931865
	CD14	Caspase	F	L	34	1	0.475962
	CD14	Caspase	F	R	35	5	1.17626
	CD14	Caspase	F	L	36	5	1.23093
	CD14	Caspase	F	R	37	2	0.412796
	CD14	Caspase	F	L	38	1	-0.481486
	CD14	Caspase	F	R	39	3	1.5594
	CD14	Caspase	F	L	40	4	1.00877
	CD14	Caspase	F	R	41	5	1.45862
	CD14	Caspase	F	L	42	1	0.405688
	CD14	Caspase	F	R	43	2	0.396896
	CD14	Caspase	F	L	44	2	0.271609
	CD14	Caspase	F	R	45	7	1.47164
	CD14	Caspase	F	L	46	2	0.649821
	CD14	Caspase	F	R	47	5	1.43816
	CD14	Caspase	F	L	48	8	1.56234
	CD14	Caspase	F	R	49	1	0.353339
	CD14	Caspase	F	L	50	5	1.0035
	CD14	Caspase	F	R	51	4	1.35887
	CD14	Caspase	F	L	52	3	1.20919
	CD14	Caspase	F	R	53	3	1.46473
	CD14	Caspase	F	L	54	5	1.02399
	CD14	Caspase	F	R	55	1	0.476976
	CD14	Caspase	F	L	56	1	0.00603795
	CD14	Caspase	F	R	57	5	0.977312
	CD14	Caspase	F	L	58	5	1.68389
	CD14	Caspase	F	R	59	5	1.36751
	CD14	Caspase	F	L	60	4	1.87739
	CD14	Caspase	F	R	61	3	0.797406
	CD14	Caspase	F	L	62	3	0.962748
	CD14	Caspase	F	R	63	2	0.690639
	CD14	Caspase	F	L	64	3	1.1533
	CD14	Caspase	F	R	65	7	1.5902
	CD14	Caspase	F	L	66	2	0.546543
	CD14	Caspase	F	R	67	3	0.7406
	CD14	Caspase	F	L	68	1	0.313867
	CD14	Caspase	F	R	69	2	0.581495
	CD14	Caspase	F	L	70	1	0.419295
	CD14	Caspase	F	R	71	1	-0.170696
	CD14	Caspase	F	L	72	2	0.432328
	CD14	Caspase	F	R	73	1	0.367356
	CD14	Caspase	F	L	74	6	1.27967
	CD14	Caspase	F	R	75	2	0.777717
	CD14	Caspase	F	L	76	6	1.9912
	CD14	Caspase	F	R	77	2	0.392521
	CD14	Caspase	F	L	78	1	0.43409
	CD14	Caspase	F	R	79	2	1.14805
	CD14	Caspase	F	L	80	2	1.03366
	CD14	Caspase	F	R	81	1	0.237544
	CD14	Caspase	F	L	82	2	0.377124
	CD14	Caspase	F	R	83	5	1.28632
	CD14	Caspase	F	L	84	4	1.21869
	CD14	Caspase	F	R	85	3	0.909503
	CD14	Caspase	F	L	86	2	1.09447
	CD14	Caspase	F	R	87	3	1.06479
	CD14	Caspase	F	L	88	1	0.273233
	CD14	Caspase	F	R	89	2	1.11062
	CD14	Caspase	F	L	90	3	1.18735
	CD14	Caspase	F	R	91	4	1.82772
	CD14	Caspase	F	L	92	2	1.04817
	CD14	Caspase	F	R	93	3	0.640779
	CD14	Caspase	F	L	94	4	1.38209
	CD14	Caspase	F	R	95	1	0.256237
	CD14	Caspase	F	L	96	2	0.443419
	CD14	Caspase	F	R	97	2	0.754883
	CD14	Caspase	F	L	98	3	1.00475
	CD14	Caspase	F	R	99	3	1.48876
	CD14	Caspase	F	L	100	1	0.192846
	CD14	Caspase	F	R	101	3	1.43829
	CD14	Caspase	F	L	102	1	0.321391
	CD14	Caspase	F	R	103	2	0.928549
	CD14	Caspase	F	L	104	1	0.287354
	CD15	Caspase	F	L	1	2	0.549126
	CD15	Caspase	F	R	2	4	1.66217
	CD15	Caspase	F	L	3	1	0.651569
	CD15	Caspase	F	R	4	1	0.414973
	CD15	Caspase	F	L	5	1	0.141763
	CD15	Caspase	F	R	6	2	0.698883
	CD15	Caspase	F	L	7	1	0.104828
	CD15	Caspase	F	R	8	5	1.85431
	CD15	Caspase	F	L	9	2	0.996424
	CD15	Caspase	F	R	10	1	-0.739929
	CD15	Caspase	F	L	11	1	-0.0362122
	CD15	Caspase	F	R	12	4	1.16122
	CD15	Caspase	F	L	13	3	0.363424
	CD15	Caspase	F	R	14	2	0.888404
	CD15	Caspase	F	L	15	7	1.02333
	CD15	Caspase	F	R	16	3	0.647676
	CD15	Caspase	F	L	17	2	0.495267
	CD15	Caspase	F	R	18	3	0.715251
	CD15	Caspase	F	L	19	4	1.00518
	CD15	Caspase	F	R	20	7	1.59441
	CD15	Caspase	F	L	21	2	1.44111
	CD15	Caspase	F	R	22	4	1.28274
	CD15	Caspase	F	L	23	6	1.35761
	CD15	Caspase	F	R	24	3	0.979321
	CD15	Caspase	F	L	25	5	1.1003
	CD15	Caspase	F	R	26	4	0.979184
	CD15	Caspase	F	L	27	8	1.27836
	CD15	Caspase	F	R	28	2	0.309417
	CD15	Caspase	F	L	29	4	0.924589
	CD15	Caspase	F	R	30	3	0.866583
	CD15	Caspase	F	L	31	3	1.42786
	CD15	Caspase	F	R	32	6	1.23842
	CD15	Caspase	F	L	33	3	1.30012
	CD15	Caspase	F	R	34	1	-0.09691
	CD15	Caspase	F	L	35	1	0.393751
	CD15	Caspase	F	R	36	10	1.80789
	CD15	Caspase	F	L	37	4	0.922725
	CD15	Caspase	F	R	38	3	0.922622
	CD15	Caspase	F	L	39	12	1.54468
	CD15	Caspase	F	R	40	5	1.10907
	CD15	Caspase	F	L	41	4	1.1173
	CD15	Caspase	F	R	42	1	-0.0594835
	CD15	Caspase	F	L	43	5	1.01199
	CD15	Caspase	F	R	44	4	0.763653
	CD15	Caspase	F	L	45	7	1.28076
	CD15	Caspase	F	R	46	2	0.634981
	CD15	Caspase	F	L	47	6	1.06874
	CD15	Caspase	F	R	48	3	0.896471
	CD15	Caspase	F	L	49	4	0.994757
	CD15	Caspase	F	R	50	2	0.452706
	CD15	Caspase	F	L	51	6	1.19612
	CD15	Caspase	F	R	52	3	0.628287
	CD15	Caspase	F	L	53	2	0.576457
	CD15	Caspase	F	R	54	5	1.21582
	CD15	Caspase	F	L	55	3	0.695394
	CD15	Caspase	F	R	56	1	0.31534
	CD15	Caspase	F	L	57	1	0.426349
	CD15	Caspase	F	R	58	2	0.332236
	CD15	Caspase	F	L	59	3	0.693903
	CD15	Caspase	F	R	60	1	0.326541
	CD15	Caspase	F	L	61	4	0.908539
	CD15	Caspase	F	R	62	5	1.34199
	CD15	Caspase	F	L	63	4	0.98073
	CD15	Caspase	F	R	64	5	1.19234
	CD15	Caspase	F	L	65	3	0.98331
	CD15	Caspase	F	R	66	2	0.318272
	CD15	Caspase	F	L	67	4	1.08113
	CD15	Caspase	F	R	68	2	0.932271
	CD15	Caspase	F	L	69	1	0.464788
	CD15	Caspase	F	R	70	3	0.640779
	CD15	Caspase	F	L	71	2	0.538951
	CD15	Caspase	F	R	72	4	0.97488
	CD15	Caspase	F	L	73	4	1.1389
	CD15	Caspase	F	R	74	2	0.476397
	CD15	Caspase	F	L	75	2	0.498586
	CD15	Caspase	F	R	76	2	0.483872
	CD15	Caspase	F	L	77	2	0.788098
	CD15	Caspase	F	R	78	5	0.852236
	CD15	Caspase	F	L	79	2	0.449324
	CD15	Caspase	F	R	80	1	0.304706
	CD15	Caspase	F	L	81	3	0.896471
	CD15	Caspase	F	R	82	3	0.821841
	CD15	Caspase	F	L	83	1	0.439017
	CD15	Caspase	F	R	84	3	0.585912
	CD15	Caspase	F	L	85	1	0.405858
	CD15	Caspase	F	R	86	2	0.173769
	CD15	Caspase	F	L	87	1	0.359266
	CD15	Caspase	F	R	88	1	-0.358526
	CD15	Caspase	F	L	89	2	0.565494
	CD15	Caspase	F	R	90	2	0.24403
	CD15	Caspase	F	L	91	2	0.689486
	CD15	Caspase	F	R	92	1	0.268578
	CD15	Caspase	F	L	93	2	0.54133
	CD15	Caspase	F	R	94	4	1.18921
	CD15	Caspase	F	L	95	1	0.528274
	CD15	Caspase	F	R	96	1	0.219323
	CD15	Caspase	F	L	97	1	-0.0584886
	CD15	Caspase	F	R	98	2	0.676968
	CD15	Caspase	F	L	99	1	0.328787
	CD15	Caspase	F	R	100	2	0.257439
	CD15	Caspase	F	L	101	2	0.499137
	CD15	Caspase	F	R	102	3	0.802089
	CD15	Caspase	F	L	103	3	0.607991
	CD15	Caspase	F	R	104	1	0.190892
	CD15	Caspase	F	L	105	4	1.06292
	CD15	Caspase	F	R	106	2	0.805025
	CD15	Caspase	F	L	107	1	0.388989
	CD15	Caspase	F	R	108	2	0.335859
	CD15	Caspase	F	L	109	4	1.29544
	CD15	Caspase	F	R	110	1	0.108903
	CD15	Caspase	F	L	111	1	0.372544
	CD15	Caspase	F	R	112	2	0.357363
	CD15	Caspase	F	L	113	4	1.18236
	CD15	Caspase	F	R	114	1	-0.0584886
	CD15	Caspase	F	L	115	1	0.31639
	CD15	Caspase	F	R	116	1	0.140822
	CD15	Caspase	F	L	117	2	0.857031
	CD15	Caspase	F	R	118	1	0.338855
	CD15	Caspase	F	L	119	1	-0.262807
	CD15	Caspase	F	R	120	1	0.279211
	CD15	Caspase	F	L	121	3	1.09202
	CD15	Caspase	F	R	122	1	0.25358
	CD15	Caspase	F	L	123	4	1.50026
	CD15	Caspase	F	R	124	2	0.870813
	CD15	Caspase	F	L	125	1	0.301464
	CD15	Caspase	F	R	126	1	0.341039
	CD15	Caspase	F	L	127	3	0.926394
	CD15	Caspase	F	R	128	2	0.416973
	CD15	Caspase	F	L	129	2	0.841109
	CD15	Caspase	F	R	130	2	0.642761
	CD15	Caspase	F	L	131	2	0.445293
	CD15	Caspase	F	R	132	2	0.590619
	CD15	Caspase	F	L	133	2	0.440752
	CD15	Caspase	F	R	134	1	-0.354578
	CD15	Caspase	F	L	135	6	1.12097
	CD15	Caspase	F	R	136	1	-0.297569
	CD15	Caspase	F	L	137	2	1.04112
	CD15	Caspase	F	R	138	2	0.440122
	CD15	Caspase	F	L	139	1	0.374015
	CD15	Caspase	F	R	140	1	-0.365523
	CD15	Caspase	F	L	141	1	0.325105
	CD15	Caspase	F	R	142	1	0.182415
	CD15	Caspase	F	L	143	6	1.7976
	CD15	Caspase	F	R	144	2	0.306211
	CD15	Caspase	F	L	145	2	0.577722
	CD15	Caspase	F	R	146	1	0.238799
	CD15	Caspase	F	L	147	1	0.381837
	CD15	Caspase	F	R	148	2	0.972851
	CD15	Caspase	F	L	149	1	-0.220404
	CD15	Caspase	F	R	150	2	0.446692
	CD15	Caspase	F	L	151	1	0.361539
	CD15	Caspase	F	R	152	1	-0.338187
	CD15	Caspase	F	L	153	4	1.2755
	CD15	Caspase	F	R	154	1	0.222456
	CD15	Caspase	F	L	155	1	0.256477
	CD15	Caspase	F	R	156	3	0.590619
	CD15	Caspase	F	L	157	7	1.66871
	CD15	Caspase	F	R	158	1	0.180986
	CD15	Caspase	F	L	159	2	0.496515
	CD15	Caspase	F	R	160	1	-0.197911
	CD15	Caspase	F	L	161	3	1.00856
	CD15	Caspase	F	R	162	2	0.425697
	CD15	Caspase	F	L	163	2	0.396722
	CD15	Caspase	F	R	164	2	0.327563
	CD15	Caspase	F	L	165	1	-0.16877
	CD15	Caspase	F	R	166	2	0.275772
	CD15	Caspase	F	L	167	3	0.936011
	CD15	Caspase	F	R	168	2	0.401401
	CD15	Caspase	F	L	169	1	-0.522879
	CD15	Caspase	F	R	170	2	-0.158015
	CD15	Caspase	F	L	171	1	0.319314
	CD15	Caspase	F	R	172	2	0.274389
	CD15	Caspase	F	L	173	2	0.639387
	CD15	Caspase	F	R	174	1	0.182985
	CD15	Caspase	F	L	175	5	1.3014
	CD15	Caspase	F	R	176	1	0.188928
	CD15	Caspase	F	L	177	2	0.867467
	CD15	Caspase	F	R	178	1	0.15412
	CD15	Caspase	F	L	179	1	-0.216811
	CD15	Caspase	F	R	180	1	0.1827
	CD15	Caspase	F	L	181	1	-0.28735
	CD15	Caspase	F	R	182	2	0.288026
	CD15	Caspase	F	L	183	1	0.288026
	CD15	Caspase	F	R	184	1	0.167908
	CD15	Caspase	F	L	185	2	0.846832
	CD15	Caspase	F	R	186	1	0.140194
	CD15	Caspase	F	L	187	1	0.335458
	CD15	Caspase	F	R	188	1	0.181844
	CD15	Caspase	F	L	189	2	0.597146
	CD15	Caspase	F	R	190	1	0.194514
	CD15	Caspase	F	L	191	1	0.312177
	CD15	Caspase	F	R	192	1	0.159266
	CD15	Caspase	F	L	193	2	0.887223
	CD15	Caspase	F	R	194	2	0.556905
	CD15	Caspase	F	L	195	1	0.283979
	CD15	Caspase	F	R	196	1	0.180699
	CD15	Caspase	F	L	197	1	0.306854
	CD15	Caspase	F	R	198	2	1.02156
	CD15	Caspase	F	L	199	2	0.378943
	CD15	Caspase	F	R	200	1	0.0951694
	CD15	Caspase	F	L	201	1	0.30298
	CD15	Caspase	F	R	202	1	0.0496056
	CD15	Caspase	F	L	203	1	-0.219683
	CD15	Caspase	F	R	204	1	0.16346
	CD15	Caspase	F	L	205	1	-0.367543
	CD15	Caspase	F	R	206	2	0.247973
	CD15	Caspase	F	L	207	1	0.247482
	CD15	Caspase	F	R	208	1	0.119256
	CD15	Caspase	F	L	209	1	0.333044
	CD15	Caspase	F	R	210	1	0.135133
	CD15	Caspase	F	L	211	1	0.192289
	CD15	Caspase	F	R	212	2	0.821055
	CD15	Caspase	F	L	213	2	0.900149
	CD15	Caspase	F	R	214	1	0.0530784
	CD15	Caspase	F	L	215	2	0.832253
	CD15	Caspase	F	R	216	2	0.993039
	CD15	Caspase	F	L	217	1	-0.0486625
	CD15	Caspase	F	R	218	1	0.0461048
	CD15	Caspase	F	L	219	4	1.17984
	CD15	Caspase	F	R	220	2	1.24022
	CD15	Caspase	F	L	221	1	-0.047692
	CD15	Caspase	F	R	222	1	-0.970616
	CD15	Caspase	F	L	223	2	0.944976
	CD15	Caspase	F	R	224	1	-0.552842
	CD15	Caspase	F	L	225	4	1.78011
	CD15	Caspase	F	R	226	1	-0.769551
	CD15	Caspase	F	L	227	2	1.42954
	CD15	Caspase	F	R	228	2	1.64437
	CD15	Caspase	F	L	229	1	0.0845763
	CD15	Caspase	F	R	230	1	-0.376751
	CD15	Caspase	F	L	231	1	-0.173925
	CD15	Caspase	F	R	232	1	-0.651695
	CD15	Caspase	F	L	233	1	0.457579
	CD15	Caspase	F	R	234	1	0.390405
	CD15	Caspase	F	L	235	4	1.95154
	CD15	Caspase	F	R	236	1	-0.950782
	CD15	Caspase	F	L	237	3	1.61486
	CD15	Caspase	F	R	238	2	1.08572
	CD15	Caspase	F	L	239	6	1.69899
	CD15	Caspase	F	R	240	1	0.288696
	CD15	Caspase	F	L	241	2	1.07842
	CD15	Caspase	F	R	242	1	-0.614394
	CD15	Caspase	F	L	243	3	1.23603
	CD15	Caspase	F	R	244	1	-0.769551
	CD15	Caspase	F	L	245	1	0.255514
	CD16	Caspase	F	R	1	1	-0.119186
	CD16	Caspase	F	L	2	2	-0.293282
	CD16	Caspase	F	R	3	2	1.0114
	CD16	Caspase	F	L	4	5	1.38012
	CD16	Caspase	F	R	5	6	1.03246
	CD16	Caspase	F	L	6	1	0.57461
	CD16	Caspase	F	R	7	4	0.891593
	CD16	Caspase	F	L	8	3	0.856427
	CD16	Caspase	F	R	9	1	0.385785
	CD16	Caspase	F	L	10	1	0.420781
	CD16	Caspase	F	R	11	3	0.819939
	CD16	Caspase	F	L	12	2	1.2578
	CD16	Caspase	F	R	13	2	1.08167
	CD16	Caspase	F	L	14	3	1.21843
	CD16	Caspase	F	R	15	1	0.476107
	CD16	Caspase	F	L	16	1	-0.924453
	CD16	Caspase	F	R	17	6	1.52785
	CD16	Caspase	F	L	18	1	0.636889
	CD16	Caspase	F	R	19	3	1.10309
	CD16	Caspase	F	L	20	1	0.50188
	CD16	Caspase	F	R	21	3	0.932474
	CD16	Caspase	F	L	22	4	1.33622
	CD16	Caspase	F	R	23	5	1.66805
	CD16	Caspase	F	L	24	1	0.278982
	CD16	Caspase	F	R	25	4	1.46244
	CD16	Caspase	F	L	26	1	0.450711
	CD16	Caspase	F	R	27	4	1.12189
	CD16	Caspase	F	L	28	2	0.710794
	CD16	Caspase	F	R	29	1	0.144574
	CD16	Caspase	F	L	30	1	0.529045
	CD16	Caspase	F	R	31	2	0.436957
	CD16	Caspase	F	L	32	1	0.444201
	CD16	Caspase	F	R	33	1	0.0378248
	CD16	Caspase	F	L	34	2	0.692759
	CD16	Caspase	F	R	35	2	0.863977
	CD16	Caspase	F	L	36	2	0.995196
	CD16	Caspase	F	R	37	2	0.522183
	CD16	Caspase	F	L	38	3	0.7074
	CD16	Caspase	F	R	39	7	1.085
	CD16	Caspase	F	L	40	6	1.50512
	CD16	Caspase	F	R	41	2	0.759819
	CD16	Caspase	F	L	42	1	0.470116
	CD16	Caspase	F	R	43	2	0.683137
	CD16	Caspase	F	L	44	1	0.415974
	CD16	Caspase	F	R	45	4	0.756256
	CD16	Caspase	F	L	46	2	0.717254
	CD16	Caspase	F	R	47	1	0.454845
	CD16	Caspase	F	L	48	4	1.32325
	CD16	Caspase	F	R	49	8	1.76646
	CD16	Caspase	F	L	50	1	0.43313
	CD16	Caspase	F	R	51	2	1.16794
	CD16	Caspase	F	L	52	1	0.45667
	CD16	Caspase	F	R	53	1	0.415474
	CD16	Caspase	F	L	54	1	-0.00833099
	CD16	Caspase	F	R	55	1	0.608098
	CD16	Caspase	F	L	56	4	0.86368
	CD16	Caspase	F	R	57	3	0.917558
	CD16	Caspase	F	L	58	4	0.90309
	CD16	Caspase	F	R	59	2	0.560982
	CD16	Caspase	F	L	60	1	0.222196
	CD16	Caspase	F	R	61	3	1.14662
	CD16	Caspase	F	L	62	2	1.30183
	CD16	Caspase	F	R	63	2	0.699491
	CD16	Caspase	F	L	64	2	0.672467
	CD16	Caspase	F	R	65	5	1.78337
	CD16	Caspase	F	L	66	3	1.61651
	CD16	Caspase	F	R	67	1	0.207904
	CD16	Caspase	F	L	68	1	0.469822
	CD16	Caspase	F	R	69	11	1.56881
	CD16	Caspase	F	L	70	2	0.863858
	CD16	Caspase	F	R	71	3	0.804753
	CD16	Caspase	F	L	72	2	0.569491
	CD16	Caspase	F	R	73	1	0.416141
	CD16	Caspase	F	L	74	1	0.103462
	CD16	Caspase	F	R	75	3	0.906066
	CD16	Caspase	F	L	76	3	1.03157
	CD16	Caspase	F	R	77	1	0.50637
	CD16	Caspase	F	L	78	1	0.50188
	CD16	Caspase	F	R	79	4	0.943198
	CD16	Caspase	F	L	80	1	0.495128
	CD16	Caspase	F	R	81	4	0.966236
	CD16	Caspase	F	L	82	2	0.663512
	CD16	Caspase	F	R	83	1	0.467756
	CD16	Caspase	F	L	84	5	1.42669
	CD16	Caspase	F	R	85	5	1.15119
	CD16	Caspase	F	L	86	2	0.586812
	CD16	Caspase	F	R	87	2	0.512284
	CD16	Caspase	F	L	88	2	1.31065
	CD16	Caspase	F	R	89	4	1.2707
	CD16	Caspase	F	L	90	2	1.41906
	CD16	Caspase	F	R	91	1	0.38003
	CD16	Caspase	F	L	92	1	0.188084
	CD16	Caspase	F	R	93	2	0.473779
	CD16	Caspase	F	L	94	1	-0.123205
	CD16	Caspase	F	R	95	3	0.642761
	CD16	Caspase	F	L	96	3	0.936413
	CD16	Caspase	F	R	97	2	0.536306
	CD16	Caspase	F	L	98	3	1.15537
	CD16	Caspase	F	R	99	2	1.58537
	CD16	Caspase	F	L	100	1	-0.238824
	CD16	Caspase	F	R	101	1	0.426511
	CD16	Caspase	F	L	102	1	-0.385103
	CD16	Caspase	F	R	103	1	0.0484418
	CD16	Caspase	F	L	104	1	-0.583359
	CD16	Caspase	F	R	105	1	0.525434
	CD16	Caspase	F	L	106	2	0.430881
	CD16	Caspase	F	R	107	3	1.31224
	CD16	Caspase	F	L	108	3	1.32035
	CD16	Caspase	F	R	109	2	1.01347
	CD16	Caspase	F	L	110	3	1.38911
	CD16	Caspase	F	R	111	4	1.72782
	CD16	Caspase	F	L	112	1	0.527759
	CD16	Caspase	F	R	113	2	1.20404
	CD16	Caspase	F	L	114	1	0.571942
	CD16	Caspase	F	R	115	2	0.814114
	CD16	Caspase	F	L	116	4	1.05065
	CD16	Caspase	F	R	117	1	0.430075
	CD16	Caspase	F	L	118	1	0.502837
	CD16	Caspase	F	R	119	2	0.912594
	CD16	Caspase	F	L	120	2	1.53246
	CD16	Caspase	F	R	121	1	0.411956
	CD16	Caspase	F	L	122	5	1.36994
	CD16	Caspase	F	R	123	1	0.403807
	CD16	Caspase	F	L	124	2	0.664078
	CD16	Caspase	F	R	125	3	1.52438
	CD16	Caspase	F	L	126	1	0.548021
	CD16	Caspase	F	R	127	1	-0.0877779
	CD16	Caspase	F	L	128	3	1.55671
	CD16	Caspase	F	R	129	1	0.379124
	CD16	Caspase	F	L	130	2	0.569374
	CD16	Caspase	F	R	131	2	1.01949
	CD16	Caspase	F	L	132	1	0.465383
	CD16	Caspase	F	R	133	1	0.21906
	CD16	Caspase	F	L	134	1	0.371806
	CD16	Caspase	F	R	135	4	0.860996
	CD16	Caspase	F	L	136	2	0.56914
	CD16	Caspase	F	R	137	2	1.31254
	CD16	Caspase	F	L	138	1	0.507586
	CD16	Caspase	F	R	139	2	0.55145
	CD16	Caspase	F	L	140	1	0.386856
	CD16	Caspase	F	R	141	1	0.202216
	CD16	Caspase	F	L	142	2	1.15284
	CD16	Caspase	F	R	143	2	0.57066
	CD16	Caspase	F	L	144	1	0.332236
	CD16	Caspase	F	R	145	2	0.0838608
	CD16	Caspase	F	L	146	2	0.876102
	CD16	Caspase	F	R	147	5	1.90842
	CD16	Caspase	F	L	148	2	0.529815
	CD16	Caspase	F	R	149	1	0.367729
	CD16	Caspase	F	L	150	2	1.09681
	CD16	Caspase	F	R	151	2	0.537693
	CD16	Caspase	F	L	152	3	1.11113
	CD16	Caspase	F	R	153	1	0.363988
	CD16	Caspase	F	L	154	2	0.627468
	CD16	Caspase	F	R	155	3	1.12094
	CD16	Caspase	F	L	156	5	1.23447
	CD16	Caspase	F	R	157	1	0.299289
	CD16	Caspase	F	L	158	1	0.300813
	CD16	Caspase	F	R	159	5	1.71139
	CD16	Caspase	F	L	160	3	1.59742
	CD16	Caspase	F	R	161	3	1.27485
	CD16	Caspase	F	L	162	5	1.66208
	CD17	tdTomato	M	L	1	7	2.36326
	CD17	tdTomato	M	R	2	15	1.50243
	CD17	tdTomato	M	L	3	1	0.211121
	CD17	tdTomato	M	R	4	16	1.67645
	CD17	tdTomato	M	L	5	24	2.01874
	CD17	tdTomato	M	R	6	5	0.697055
	CD17	tdTomato	M	L	7	1	-0.378824
	CD17	tdTomato	M	R	8	1	0.12969
	CD17	tdTomato	M	L	9	6	1.12018
	CD17	tdTomato	M	R	10	5	1.48303
	CD17	tdTomato	M	L	11	4	1.63516
	CD17	tdTomato	M	R	12	1	0.317018
	CD17	tdTomato	M	L	13	8	1.56646
	CD17	tdTomato	M	R	14	8	1.45139
	CD17	tdTomato	M	L	15	12	1.99675
	CD17	tdTomato	M	R	16	8	0.976579
	CD17	tdTomato	M	L	17	8	1.95494
	CD17	tdTomato	M	R	18	5	1.6908
	CD17	tdTomato	M	L	19	4	1.50081
	CD17	tdTomato	M	R	20	6	1.4542
	CD17	tdTomato	M	L	21	14	1.82874
	CD17	tdTomato	M	R	22	4	0.755417
	CD17	tdTomato	M	L	23	12	1.61038
	CD17	tdTomato	M	R	24	4	0.819544
	CD17	tdTomato	M	L	25	7	2.09074
	CD17	tdTomato	M	R	26	4	0.995108
	CD17	tdTomato	M	L	27	4	0.927781
	CD17	tdTomato	M	R	28	2	0.945272
	CD17	tdTomato	M	L	29	9	1.57128
	CD17	tdTomato	M	R	30	4	0.637189
	CD17	tdTomato	M	L	31	3	0.273001
	CD17	tdTomato	M	R	32	3	0.901186
	CD17	tdTomato	M	L	33	3	0.631545
	CD17	tdTomato	M	R	34	11	1.89639
	CD17	tdTomato	M	L	35	4	0.971461
	CD17	tdTomato	M	R	36	7	1.22871
	CD17	tdTomato	M	L	37	5	1.15969
	CD17	tdTomato	M	R	38	1	0.446071
	CD17	tdTomato	M	L	39	7	1.41607
	CD17	tdTomato	M	R	40	2	0.735918
	CD17	tdTomato	M	L	41	8	1.56825
	CD17	tdTomato	M	R	42	3	1.4128
	CD17	tdTomato	M	L	43	3	1.10524
	CD17	tdTomato	M	R	44	1	0.299943
	CD17	tdTomato	M	L	45	4	1.09008
	CD17	tdTomato	M	R	46	2	0.873146
	CD17	tdTomato	M	L	47	4	1.06435
	CD17	tdTomato	M	R	48	12	1.18946
	CD17	tdTomato	M	L	49	6	1.09771
	CD17	tdTomato	M	R	50	5	1.38719
	CD17	tdTomato	M	L	51	18	1.63126
	CD17	tdTomato	M	R	52	2	0.722881
	CD17	tdTomato	M	L	53	24	1.75978
	CD17	tdTomato	M	R	54	6	1.2769
	CD17	tdTomato	M	L	55	8	1.49792
	CD17	tdTomato	M	R	56	11	1.22513
	CD17	tdTomato	M	L	57	5	1.00796
	CD17	tdTomato	M	R	58	5	0.940218
	CD17	tdTomato	M	L	59	8	1.75349
	CD17	tdTomato	M	R	60	1	0.343802
	CD17	tdTomato	M	L	61	1	0.159868
	CD17	tdTomato	M	R	62	4	0.72049
	CD17	tdTomato	M	L	63	1	0.584444
	CD17	tdTomato	M	R	64	3	0.755417
	CD17	tdTomato	M	L	65	4	1.40111
	CD17	tdTomato	M	R	66	5	0.846585
	CD17	tdTomato	M	L	67	1	0.00302947
	CD17	tdTomato	M	R	68	2	0.727134
	CD17	tdTomato	M	L	69	8	1.393
	CD17	tdTomato	M	R	70	2	0.751818
	CD17	tdTomato	M	L	71	8	0.868644
	CD17	tdTomato	M	R	72	8	1.54228
	CD17	tdTomato	M	L	73	4	0.921114
	CD17	tdTomato	M	R	74	3	1.14768
	CD17	tdTomato	M	L	75	1	0.124178
	CD17	tdTomato	M	R	76	3	1.12506
	CD17	tdTomato	M	L	77	5	1.14139
	CD17	tdTomato	M	R	78	2	0.728273
	CD17	tdTomato	M	L	79	3	0.846708
	CD17	tdTomato	M	R	80	2	1.083
	CD17	tdTomato	M	L	81	13	1.63891
	CD17	tdTomato	M	R	82	2	1.24733
	CD17	tdTomato	M	L	83	6	1.46318
	CD17	tdTomato	M	R	84	3	0.928345
	CD17	tdTomato	M	L	85	1	0.484015
	CD17	tdTomato	M	R	86	2	1.24485
	CD17	tdTomato	M	L	87	1	-0.0254883
	CD17	tdTomato	M	R	88	3	1.23464
	CD17	tdTomato	M	L	89	5	1.51294
	CD17	tdTomato	M	R	90	4	0.811709
	CD17	tdTomato	M	L	91	7	1.11504
	CD17	tdTomato	M	R	92	2	0.715836
	CD17	tdTomato	M	L	93	4	0.881841
	CD17	tdTomato	M	R	94	3	0.71307
	CD17	tdTomato	M	L	95	8	1.24485
	CD17	tdTomato	M	R	96	2	1.17041
	CD17	tdTomato	M	L	97	6	1.25732
	CD17	tdTomato	M	R	98	2	0.698709
	CD17	tdTomato	M	L	99	27	1.695
	CD17	tdTomato	M	R	100	3	0.790707
	CD17	tdTomato	M	L	101	6	0.95376
	CD17	tdTomato	M	R	102	2	0.906227
	CD17	tdTomato	M	L	103	5	1.067
	CD17	tdTomato	M	R	104	1	-0.0584886
	CD17	tdTomato	M	L	105	3	0.892039
	CD17	tdTomato	M	R	106	2	0.640283
	CD17	tdTomato	M	L	107	2	0.919026
	CD17	tdTomato	M	R	108	3	0.854306
	CD17	tdTomato	M	L	109	3	0.663701
	CD17	tdTomato	M	R	110	4	0.63739
	CD17	tdTomato	M	L	111	4	1.66839
	CD17	tdTomato	M	R	112	4	1.27265
	CD17	tdTomato	M	L	113	2	0.453318
	CD17	tdTomato	M	R	114	1	-0.0963675
	CD18	tdTomato	M	R	1	1	-0.785156
	CD18	tdTomato	M	L	2	5	2.0749
	CD18	tdTomato	M	R	3	2	1.20347
	CD18	tdTomato	M	L	4	20	2.1699
	CD18	tdTomato	M	R	5	6	0.912859
	CD18	tdTomato	M	L	6	9	1.07306
	CD18	tdTomato	M	R	7	9	1.25137
	CD18	tdTomato	M	L	8	1	0.310056
	CD18	tdTomato	M	R	9	2	1.38046
	CD18	tdTomato	M	L	10	6	1.61829
	CD18	tdTomato	M	R	11	3	0.675595
	CD18	tdTomato	M	L	12	18	1.46598
	CD18	tdTomato	M	R	13	4	0.971369
	CD18	tdTomato	M	L	14	9	1.01557
	CD18	tdTomato	M	R	15	4	0.772248
	CD18	tdTomato	M	L	16	6	0.957703
	CD18	tdTomato	M	R	17	4	0.631748
	CD18	tdTomato	M	L	18	8	0.984797
	CD18	tdTomato	M	R	19	5	1.28836
	CD18	tdTomato	M	L	20	2	0.779308
	CD18	tdTomato	M	R	21	6	1.62452
	CD18	tdTomato	M	L	22	4	1.1182
	CD18	tdTomato	M	R	23	4	0.81697
	CD18	tdTomato	M	L	24	2	1.45017
	CD18	tdTomato	M	R	25	1	0.410777
	CD18	tdTomato	M	L	26	4	1.86016
	CD18	tdTomato	M	R	27	2	0.808346
	CD18	tdTomato	M	L	28	4	1.87706
	CD18	tdTomato	M	R	29	3	1.51817
	CD18	tdTomato	M	L	30	30	1.9963
	CD18	tdTomato	M	R	31	2	0.435844
	CD18	tdTomato	M	L	32	6	1.00445
	CD18	tdTomato	M	R	33	5	1.5293
	CD18	tdTomato	M	L	34	9	1.54189
	CD18	tdTomato	M	R	35	2	0.774882
	CD18	tdTomato	M	L	36	12	2.08084
	CD18	tdTomato	M	R	37	4	0.824126
	CD18	tdTomato	M	L	38	8	1.43766
	CD18	tdTomato	M	R	39	1	0.585009
	CD18	tdTomato	M	L	40	12	1.21706
	CD18	tdTomato	M	R	41	3	0.975937
	CD18	tdTomato	M	L	42	3	0.856245
	CD18	tdTomato	M	R	43	4	0.813781
	CD18	tdTomato	M	L	44	9	1.64587
	CD18	tdTomato	M	R	45	6	1.43119
	CD18	tdTomato	M	L	46	3	1.56023
	CD18	tdTomato	M	R	47	2	0.902818
	CD18	tdTomato	M	L	48	4	0.742568
	CD18	tdTomato	M	R	49	2	0.790144
	CD18	tdTomato	M	L	50	8	2.19509
	CD18	tdTomato	M	R	51	7	1.33638
	CD18	tdTomato	M	L	52	5	0.982633
	CD18	tdTomato	M	R	53	4	0.962559
	CD18	tdTomato	M	L	54	6	2.13449
	CD18	tdTomato	M	R	55	5	0.997648
	CD18	tdTomato	M	L	56	2	1.86104
	CD18	tdTomato	M	R	57	2	0.848559
	CD18	tdTomato	M	L	58	3	1.40538
	CD18	tdTomato	M	R	59	1	0.261263
	CD18	tdTomato	M	L	60	1	0.545307
	CD18	tdTomato	M	R	61	1	0.176381
	CD18	tdTomato	M	L	62	1	0.106531
	CD18	tdTomato	M	R	63	3	1.43462
	CD18	tdTomato	M	L	64	4	1.33712
	CD18	tdTomato	M	R	65	1	0.262214
	CD18	tdTomato	M	L	66	3	0.658774
	CD18	tdTomato	M	R	67	2	1.42449
	CD18	tdTomato	M	L	68	4	1.06945
	CD18	tdTomato	M	R	69	5	1.69973
	CD18	tdTomato	M	L	70	10	1.75644
	CD18	tdTomato	M	R	71	1	0.441538
	CD18	tdTomato	M	L	72	1	0.578525
	CD18	tdTomato	M	R	73	5	1.0778
	CD18	tdTomato	M	L	74	2	0.866701
	CD19	tdTomato	M	L	1	1	-0.675718
	CD19	tdTomato	M	R	2	21	2.37981
	CD19	tdTomato	M	L	3	4	0.766636
	CD19	tdTomato	M	R	4	11	1.40243
	CD19	tdTomato	M	L	5	8	1.6268
	CD19	tdTomato	M	R	6	1	0.448242
	CD19	tdTomato	M	L	7	5	1.27552
	CD19	tdTomato	M	R	8	10	1.62123
	CD19	tdTomato	M	L	9	6	0.784046
	CD19	tdTomato	M	R	10	1	0.292699
	CD19	tdTomato	M	L	11	3	0.82007
	CD19	tdTomato	M	R	12	10	1.73032
	CD19	tdTomato	M	L	13	3	0.986637
	CD19	tdTomato	M	R	14	2	0.273927
	CD19	tdTomato	M	L	15	15	1.50607
	CD19	tdTomato	M	R	16	8	1.14348
	CD19	tdTomato	M	L	17	2	0.653984
	CD19	tdTomato	M	R	18	6	1.04852
	CD19	tdTomato	M	L	19	9	1.86878
	CD19	tdTomato	M	R	20	4	0.952405
	CD19	tdTomato	M	L	21	2	0.633872
	CD19	tdTomato	M	R	22	3	1.28954
	CD19	tdTomato	M	L	23	5	1.37151
	CD19	tdTomato	M	R	24	1	0.561101
	CD19	tdTomato	M	L	25	3	0.965202
	CD19	tdTomato	M	R	26	13	1.38207
	CD19	tdTomato	M	L	27	8	1.74017
	CD19	tdTomato	M	R	28	2	0.479575
	CD19	tdTomato	M	L	29	2	0.731669
	CD19	tdTomato	M	R	30	20	1.72652
	CD19	tdTomato	M	L	31	1	0.570309
	CD19	tdTomato	M	R	32	3	1.51186
	CD19	tdTomato	M	L	33	6	2.09045
	CD19	tdTomato	M	R	34	6	1.35
	CD19	tdTomato	M	L	35	4	2.01862
	CD19	tdTomato	M	R	36	11	1.61877
	CD19	tdTomato	M	L	37	4	1.43689
	CD19	tdTomato	M	R	38	12	1.66769
	CD19	tdTomato	M	L	39	6	1.43074
	CD19	tdTomato	M	R	40	3	1.37297
	CD19	tdTomato	M	L	41	4	1.66684
	CD19	tdTomato	M	R	42	4	1.82002
	CD19	tdTomato	M	L	43	2	0.887336
	CD19	tdTomato	M	R	44	5	1.60561
	CD19	tdTomato	M	L	45	5	1.58697
	CD19	tdTomato	M	R	46	4	2.26593
	CD19	tdTomato	M	L	47	1	0.606596
	CD19	tdTomato	M	R	48	1	0.373464
	CD19	tdTomato	M	L	49	1	0.771587
	CD19	tdTomato	M	R	50	2	0.667079
	CD19	tdTomato	M	L	51	1	0.520484
	CD19	tdTomato	M	R	52	5	1.59249
	CD19	tdTomato	M	L	53	5	1.47135
	CD19	tdTomato	M	R	54	6	1.6474
	CD19	tdTomato	M	L	55	2	1.15171
	CD19	tdTomato	M	R	56	3	1.1209
	CD19	tdTomato	M	L	57	1	0.606059
	CD19	tdTomato	M	R	58	1	0.204391
	CD19	tdTomato	M	L	59	1	0.584331
	CD19	tdTomato	M	R	60	1	0.401056
	CD19	tdTomato	M	L	61	1	0.398634
	CD19	tdTomato	M	R	62	16	1.82097
	CD19	tdTomato	M	L	63	1	0.273464
	CD19	tdTomato	M	R	64	2	1.19404
	CD19	tdTomato	M	L	65	1	0.435207
	CD20	tdTomato	F	L	1	5	2.33324
	CD20	tdTomato	F	R	2	7	1.68886
	CD20	tdTomato	F	L	3	2	0.99025
	CD20	tdTomato	F	R	4	3	0.716254
	CD20	tdTomato	F	L	5	1	0.180986
	CD20	tdTomato	F	R	6	4	1.87687
	CD20	tdTomato	F	L	7	2	1.07933
	CD20	tdTomato	F	R	8	4	1.27149
	CD20	tdTomato	F	L	9	3	0.773933
	CD20	tdTomato	F	R	10	1	0.712313
	CD20	tdTomato	F	L	11	1	0.255996
	CD20	tdTomato	F	R	12	4	1.21685
	CD20	tdTomato	F	L	13	2	0.676876
	CD20	tdTomato	F	R	14	1	0.514548
	CD20	tdTomato	F	L	15	10	2.13253
	CD20	tdTomato	F	R	16	3	1.93605
	CD20	tdTomato	F	L	17	5	2.4471
	CD20	tdTomato	F	R	18	2	0.852907
	CD20	tdTomato	F	L	19	1	0.516668
	CD20	tdTomato	F	R	20	1	0.369587
	CD20	tdTomato	F	L	21	5	1.62659
	CD20	tdTomato	F	R	22	9	1.27948
	CD20	tdTomato	F	L	23	4	0.962795
	CD20	tdTomato	F	R	24	7	1.10694
	CD20	tdTomato	F	L	25	7	1.39896
	CD20	tdTomato	F	R	26	12	1.999
	CD20	tdTomato	F	L	27	1	0.539202
	CD20	tdTomato	F	R	28	1	0.609594
	CD20	tdTomato	F	L	29	2	1.07052
	CD20	tdTomato	F	R	30	2	1.04155
	CD20	tdTomato	F	L	31	4	1.00221
	CD20	tdTomato	F	R	32	5	1.38846
	CD20	tdTomato	F	L	33	1	0.383277
	CD20	tdTomato	F	R	34	3	1.86161
	CD20	tdTomato	F	L	35	3	0.647187
	CD20	tdTomato	F	R	36	5	1.21543
	CD20	tdTomato	F	L	37	2	0.971601
	CD20	tdTomato	F	R	38	16	1.79594
	CD20	tdTomato	F	L	39	2	0.857755
	CD20	tdTomato	F	R	40	4	1.17794
	CD20	tdTomato	F	L	41	5	1.26891
	CD20	tdTomato	F	R	42	4	1.51073
	CD20	tdTomato	F	L	43	17	2.02352
	CD20	tdTomato	F	R	44	1	0.425697
	CD20	tdTomato	F	L	45	3	1.59551
	CD20	tdTomato	F	R	46	2	0.617734
	CD20	tdTomato	F	L	47	4	1.47167
	CD20	tdTomato	F	R	48	8	1.7398
	CD20	tdTomato	F	L	49	1	0.37767
	CD20	tdTomato	F	R	50	4	1.36957
	CD20	tdTomato	F	L	51	3	1.53634
	CD20	tdTomato	F	R	52	2	1.26394
	CD20	tdTomato	F	L	53	6	1.33626
	CD20	tdTomato	F	R	54	3	0.987577
	CD20	tdTomato	F	L	55	1	0.398461
	CD20	tdTomato	F	R	56	6	2.19196
	CD20	tdTomato	F	L	57	2	0.337459
	CD20	tdTomato	F	R	58	3	1.07423
	CD20	tdTomato	F	L	59	1	-0.0604807
	CD20	tdTomato	F	R	60	2	0.710202
	CD21	tdTomato	F	R	1	8	2.29487
	CD21	tdTomato	F	L	2	8	2.1688
	CD21	tdTomato	F	R	3	4	0.857935
	CD21	tdTomato	F	L	4	1	0.43393
	CD21	tdTomato	F	R	5	1	0.0696681
	CD21	tdTomato	F	L	6	3	1.04477
	CD21	tdTomato	F	R	7	8	1.81449
	CD21	tdTomato	F	L	8	10	2.34702
	CD21	tdTomato	F	R	9	3	1.14771
	CD21	tdTomato	F	L	10	2	0.751048
	CD21	tdTomato	F	R	11	5	1.26722
	CD21	tdTomato	F	L	12	9	1.61979
	CD21	tdTomato	F	R	13	2	0.759366
	CD21	tdTomato	F	L	14	6	2.59514
	CD21	tdTomato	F	R	15	4	1.40269
	CD21	tdTomato	F	L	16	4	1.70441
	CD21	tdTomato	F	R	17	2	0.838408
	CD21	tdTomato	F	L	18	5	1.68984
	CD21	tdTomato	F	R	19	1	0.619198
	CD21	tdTomato	F	L	20	1	0.248954
	CD21	tdTomato	F	R	21	5	1.09527
	CD21	tdTomato	F	L	22	3	0.852663
	CD21	tdTomato	F	R	23	3	0.962748
	CD21	tdTomato	F	L	24	2	0.783832
	CD21	tdTomato	F	R	25	1	0.532372
	CD21	tdTomato	F	L	26	3	0.307496
	CD21	tdTomato	F	R	27	3	1.97735
	CD21	tdTomato	F	L	28	3	2.01447
	CD21	tdTomato	F	R	29	3	1.14569
	CD21	tdTomato	F	L	30	3	0.844104
	CD21	tdTomato	F	R	31	10	2.87581
	CD22	tdTomato	F	L	1	1	-0.402305
	CD22	tdTomato	F	R	2	6	0.896967
	CD22	tdTomato	F	L	3	1	0.806044
	CD22	tdTomato	F	R	4	5	1.24898
	CD22	tdTomato	F	L	5	4	1.25428
	CD22	tdTomato	F	R	6	3	0.783546
	CD22	tdTomato	F	L	7	1	-0.759451
	CD22	tdTomato	F	R	8	3	0.910304
	CD22	tdTomato	F	L	9	2	0.851747
	CD22	tdTomato	F	R	10	2	0.168792
	CD22	tdTomato	F	L	11	2	1.5301
	CD22	tdTomato	F	R	12	3	0.907196
	CD22	tdTomato	F	L	13	2	1.31175
	CD22	tdTomato	F	R	14	3	1.48782
	CD22	tdTomato	F	L	15	1	-0.578396
	CD22	tdTomato	F	R	16	1	0.333044
	CD22	tdTomato	F	L	17	4	1.14956
	CD22	tdTomato	F	R	18	2	0.537693
	CD22	tdTomato	F	L	19	1	0.351989
	CD22	tdTomato	F	R	20	6	2.29927
	CD22	tdTomato	F	L	21	2	1.68162
	CD22	tdTomato	F	R	22	4	1.5953
	CD22	tdTomato	F	L	23	2	0.726483
	CD22	tdTomato	F	R	24	3	1.20257
	CD22	tdTomato	F	L	25	2	0.612466
	CD22	tdTomato	F	R	26	3	1.00715
	CD22	tdTomato	F	L	27	6	1.35395
	CD22	tdTomato	F	R	28	2	0.752279
	CD22	tdTomato	F	L	29	1	0.320354
	CD22	tdTomato	F	R	30	3	1.09381
	CD22	tdTomato	F	L	31	2	1.44675
	CD22	tdTomato	F	R	32	1	-0.220404
	CD22	tdTomato	F	L	33	2	1.26637
	CD22	tdTomato	F	R	34	6	1.42529
	CD22	tdTomato	F	L	35	2	2.02534
	CD22	tdTomato	F	R	36	3	0.811307
	CD22	tdTomato	F	L	37	4	2.00083
	CD22	tdTomato	F	R	38	4	0.999043
	CD22	tdTomato	F	L	39	4	1.54838
	CD22	tdTomato	F	R	40	2	0.940915
	CD22	tdTomato	F	L	41	2	0.79162
	CD22	tdTomato	F	R	42	3	1.01326
	CD22	tdTomato	F	L	43	1	0.464191
	CD22	tdTomato	F	R	44	4	1.60625
	CD22	tdTomato	F	L	45	3	1.04984
	CD22	tdTomato	F	R	46	2	0.460597
	CD22	tdTomato	F	L	47	2	0.727623
	CD22	tdTomato	F	R	48	5	1.66275
	CD22	tdTomato	F	L	49	2	0.650987
	CD22	tdTomato	F	R	50	4	1.59026
	CD22	tdTomato	F	L	51	3	0.772688
	CD22	tdTomato	F	R	52	3	1.24272
	CD22	tdTomato	F	L	53	4	1.7872
	CD22	tdTomato	F	R	54	3	0.854792
	CD22	tdTomato	F	L	55	4	1.35572
	CD22	tdTomato	F	R	56	2	0.641771
	CD22	tdTomato	F	L	57	1	0.398287
	CD22	tdTomato	F	R	58	3	0.901948
	CD22	tdTomato	F	L	59	3	1.70485
	CD22	tdTomato	F	R	60	5	1.85899
	CD22	tdTomato	F	L	61	1	0.530968
	CD22	tdTomato	F	R	62	3	1.43859
	CD22	tdTomato	F	L	63	4	1.66311
	CD22	tdTomato	F	R	64	2	0.660011
	CD22	tdTomato	F	L	65	4	1.97523
	CD22	tdTomato	F	R	66	2	1.41032
	CD22	tdTomato	F	L	67	6	2.20895
	CD22	tdTomato	F	R	68	1	0.329805
	CD22	tdTomato	F	L	69	3	1.33574
