# Supplementary material for: Maturation of cortical input to dorsal raphe nucleus increases behavioral persistence in mice
Source: eLife journal article supplement (doi:10.7554/elife.93485), 2024-03-13

A

Example Control DRN

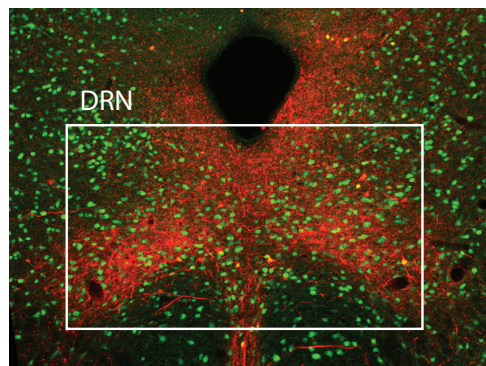

Example Caspase DRN

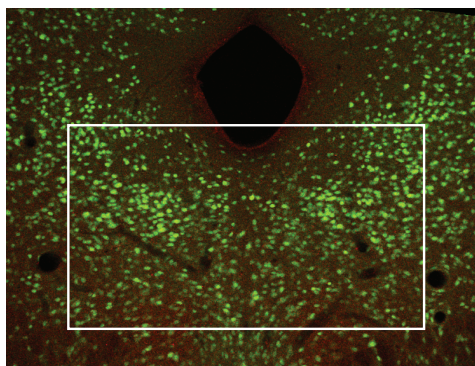

B

Binned tdTomato  
signal (axons) across control mice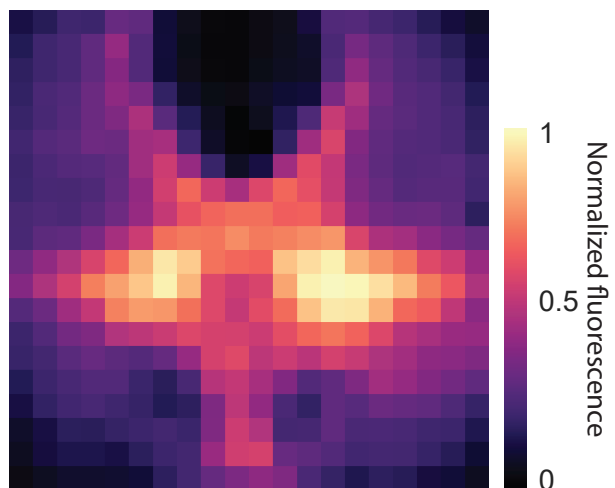

C

Average binned Neun density:  
Control - Caspase mice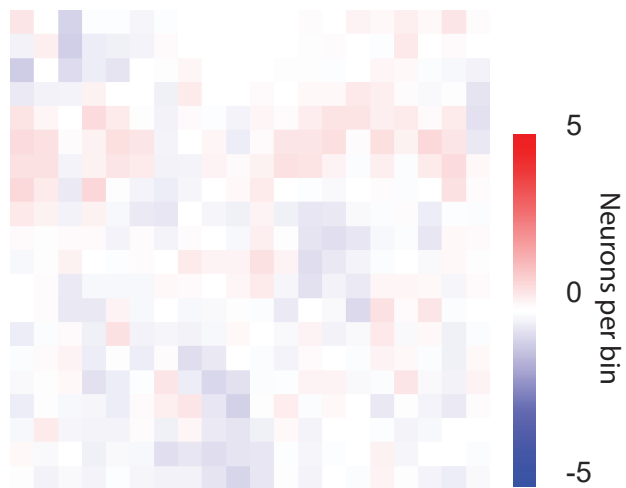

Supplement: supp [file elife_poa_e93485_Figure_3_figure_supplement_1.pdf › elife_poa_e93485_Figure_3_figure_supplement_1.pdf]
