# Supplementary figures and images for: Maturation of cortical input to dorsal raphe nucleus increases behavioral persistence in mice
Source: eLife journal article supplement (doi:10.7554/elife.93485), 2024-03-13

A

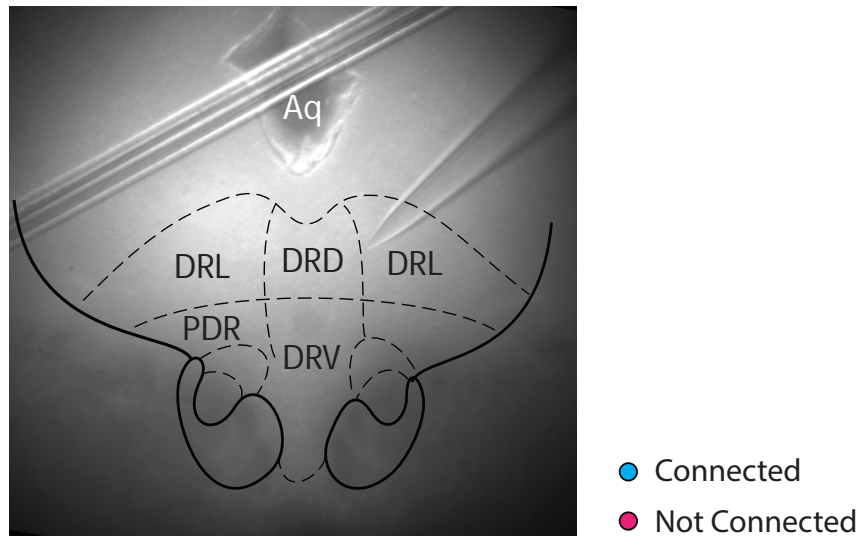

B

Juvenile Mice

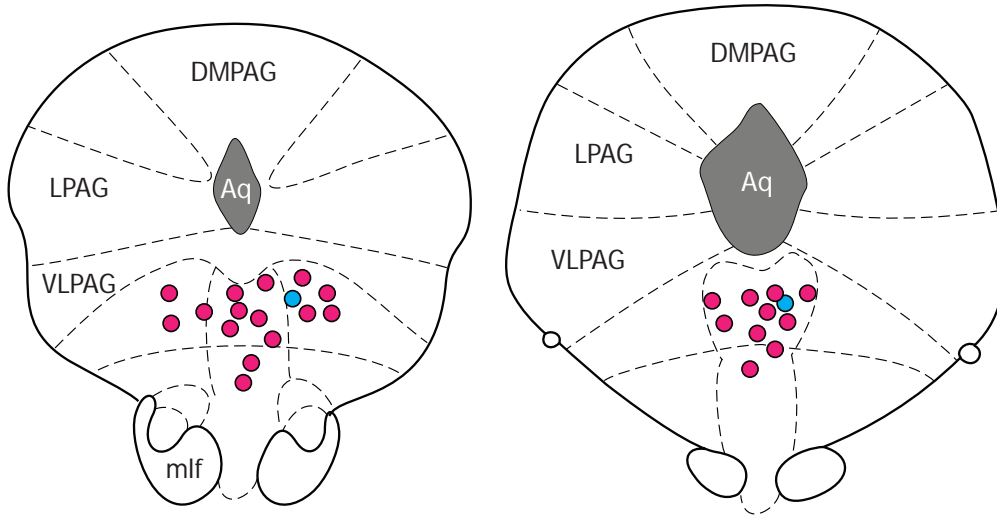

C

Adult Mice

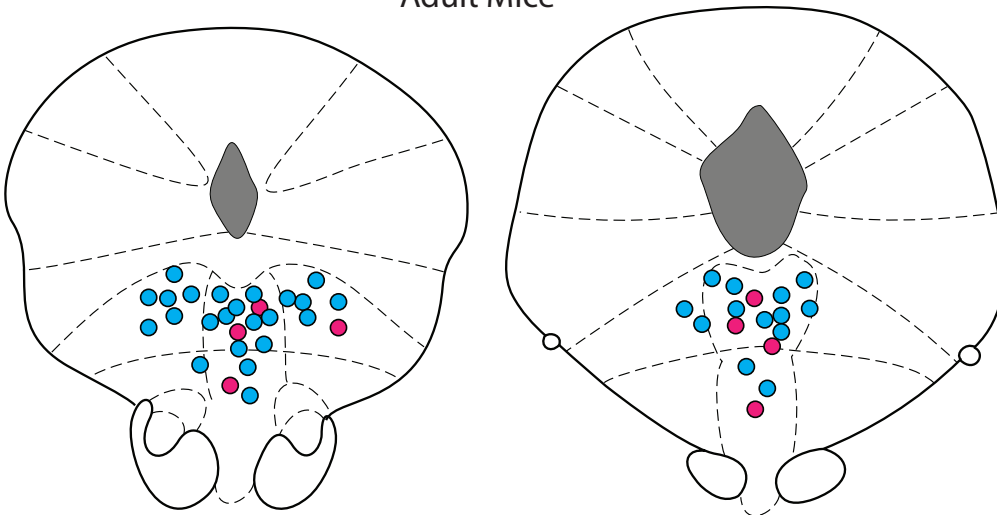

Bregma 4.3-4.4

Bregma 4.7-4.8

Supplement: supp [file elife_poa_e93485_Figure_1_figure_supplement_1.pdf › elife_poa_e93485_Figure_1_figure_supplement_1.pdf]

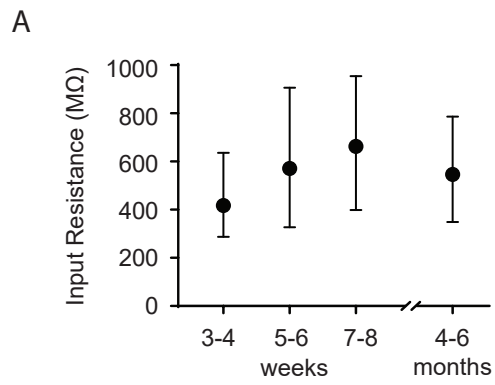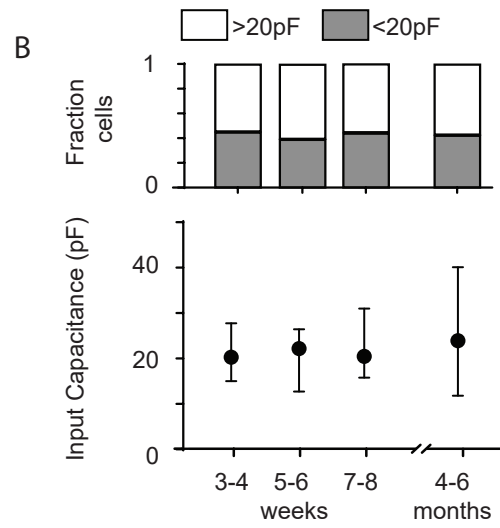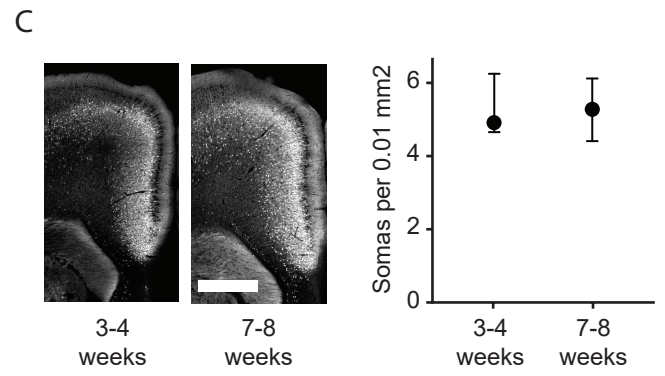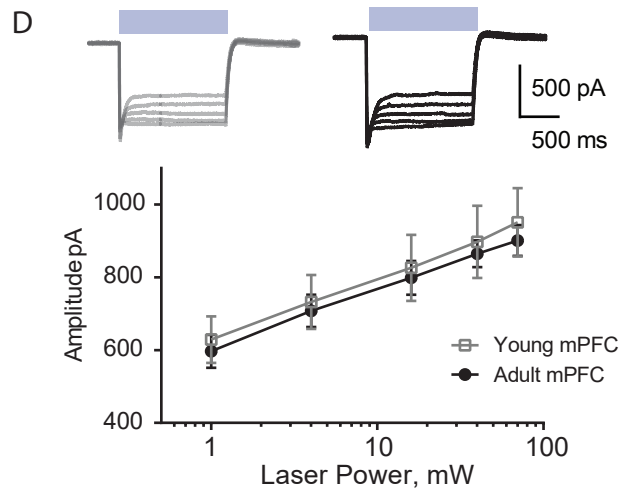

Supplement: supp [file elife_poa_e93485_Figure_1_figure_supplement_2.pdf › elife_poa_e93485_Figure_1_figure_supplement_2.pdf]

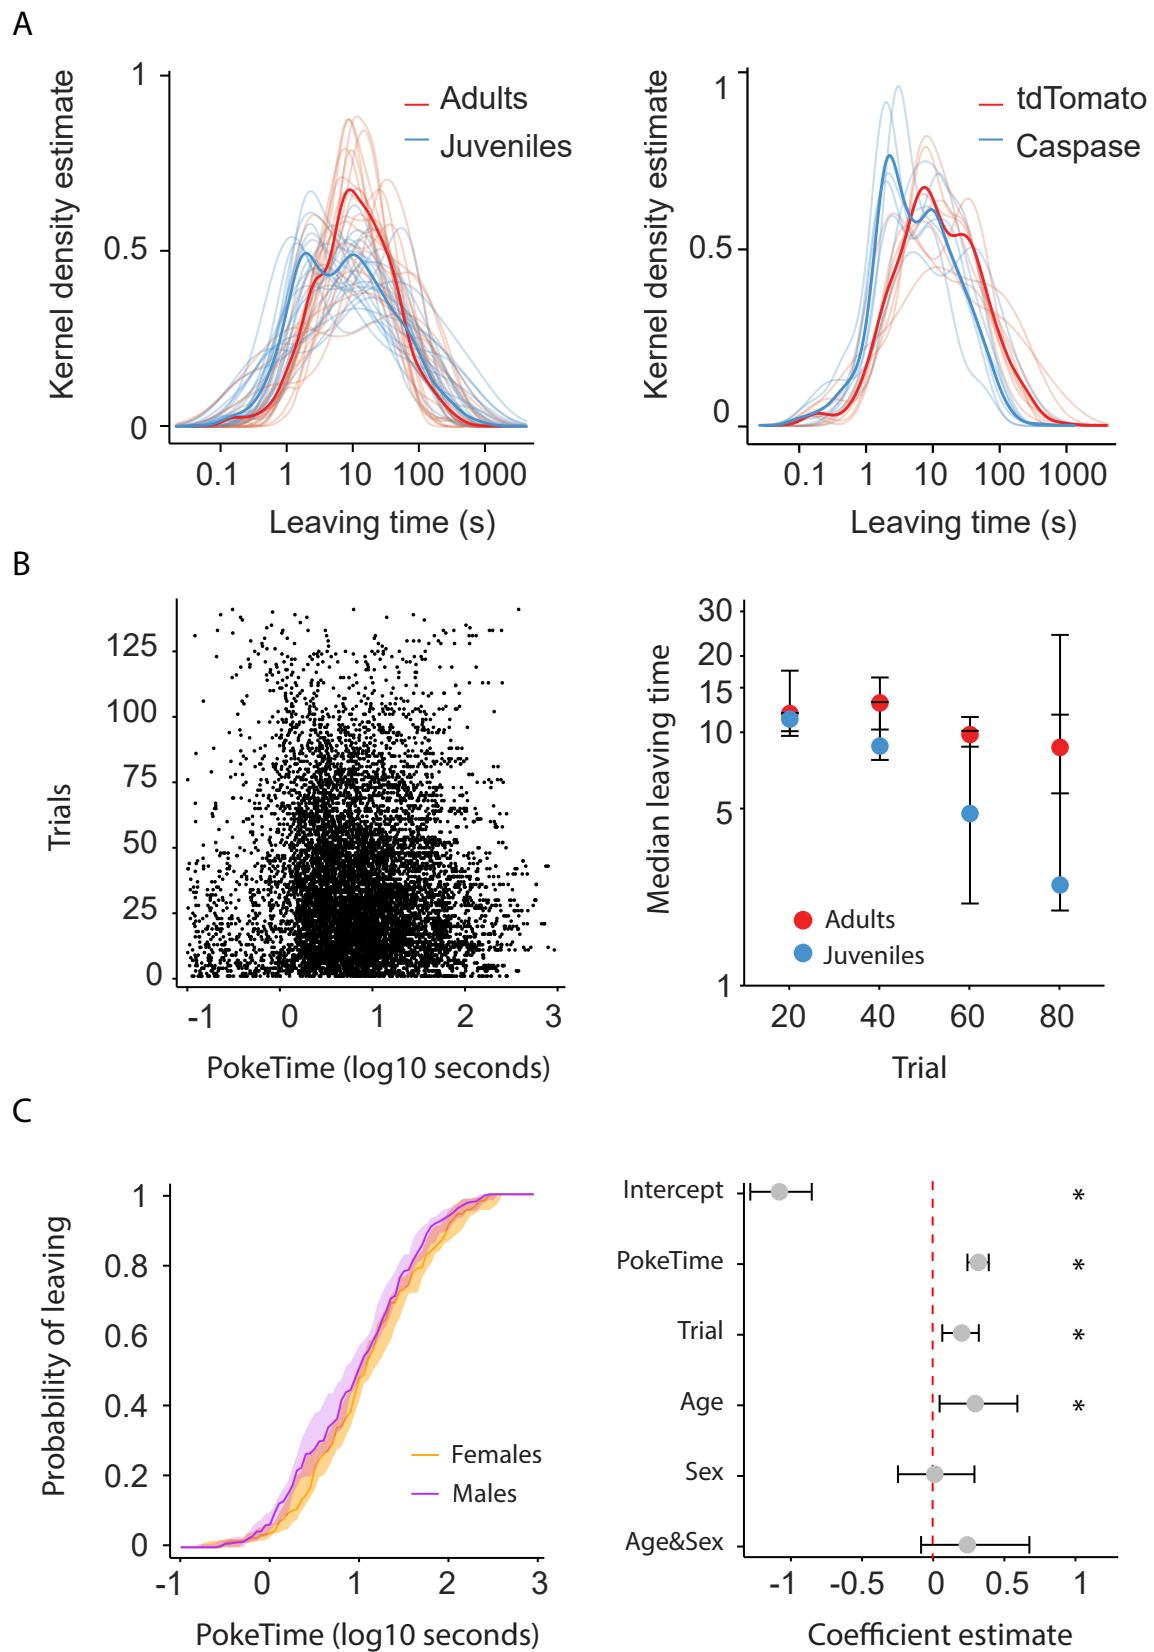

Supplement: supp [file elife_poa_e93485_Figure_2_figure_supplement_1.pdf › elife_poa_e93485_Figure_2_figure_supplement_1.pdf]

A

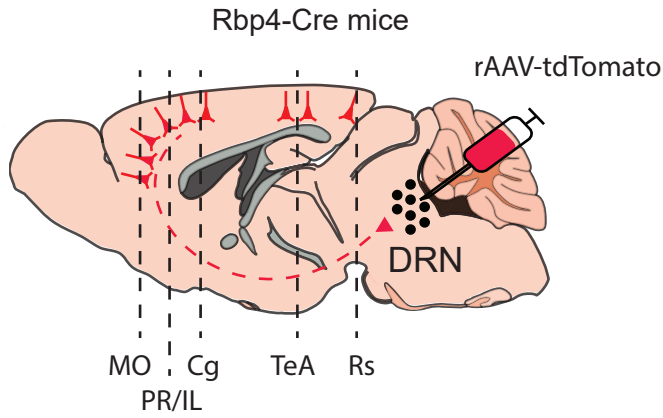

B

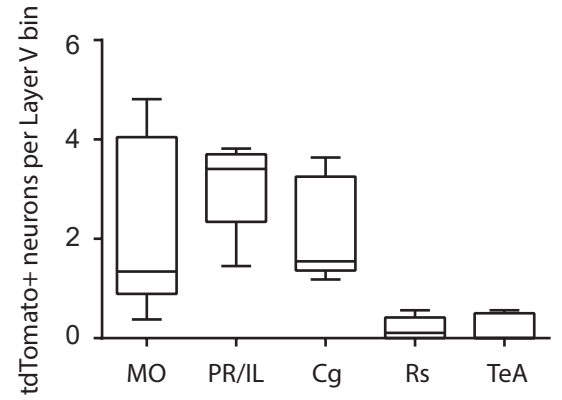

C

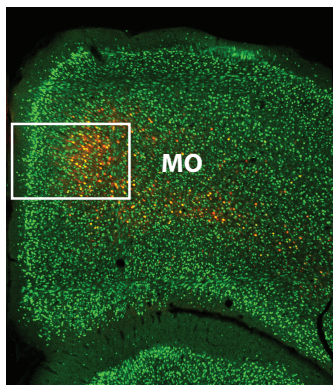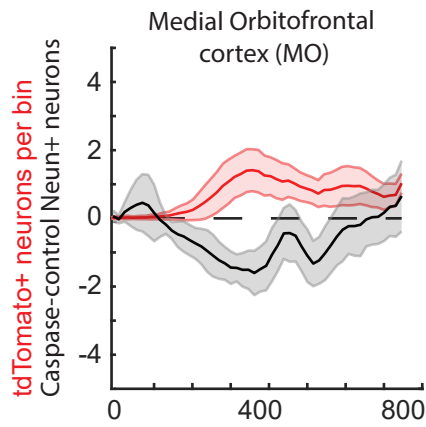

F

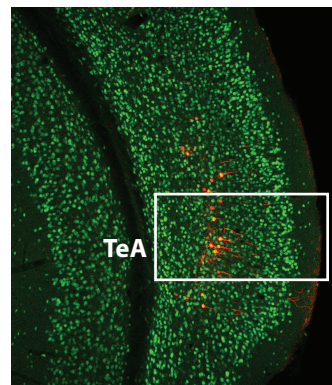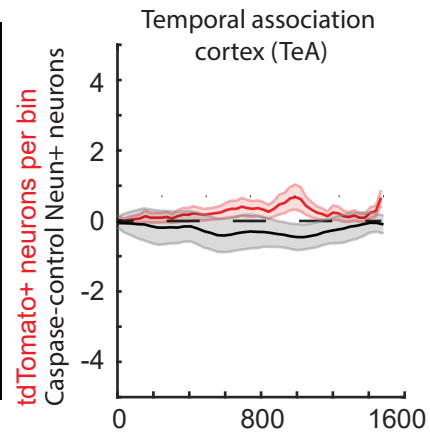

D

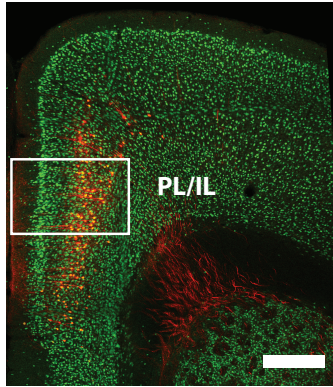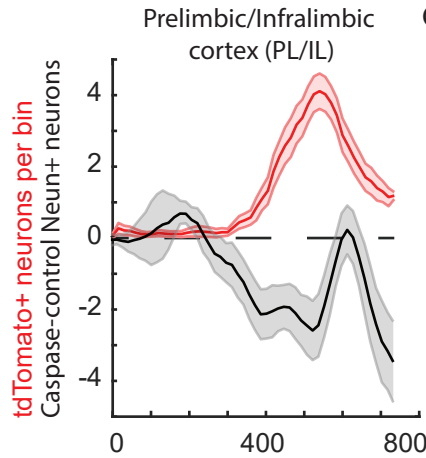

G

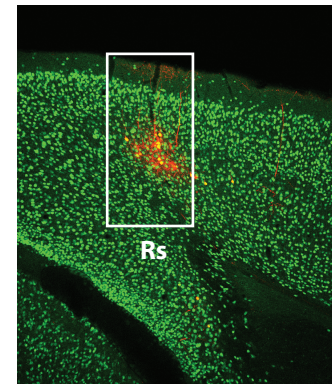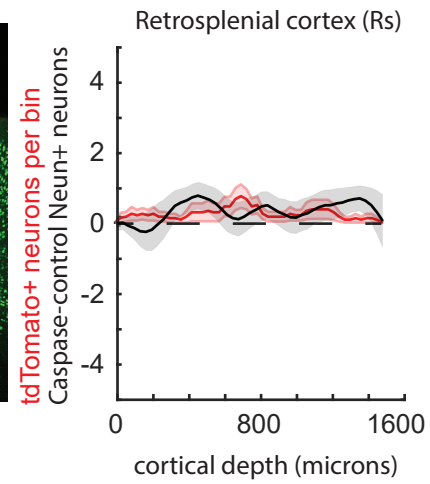

E

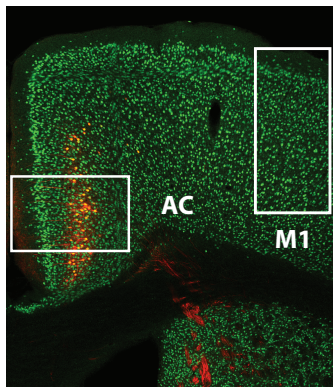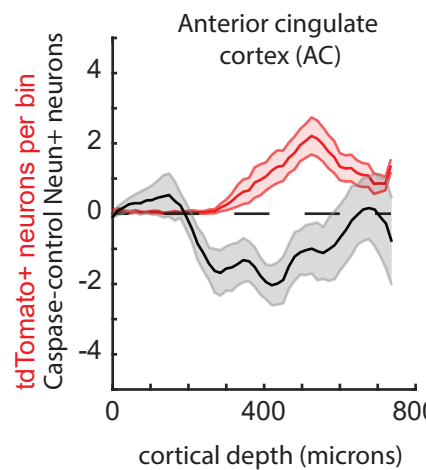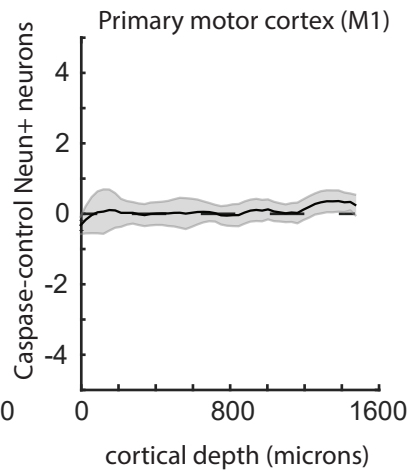

Supplement: supp [file elife_poa_e93485_Figure_3_figure_supplement_2.pdf › elife_poa_e93485_Figure_3_figure_supplement_2.pdf]

A

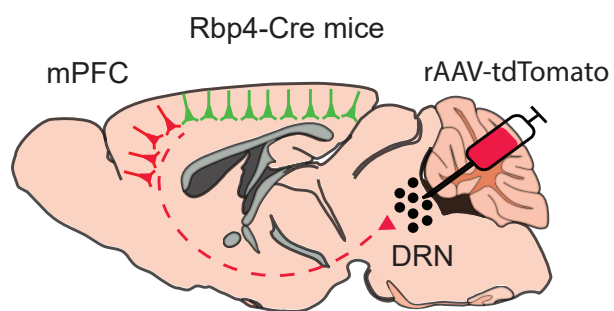

B

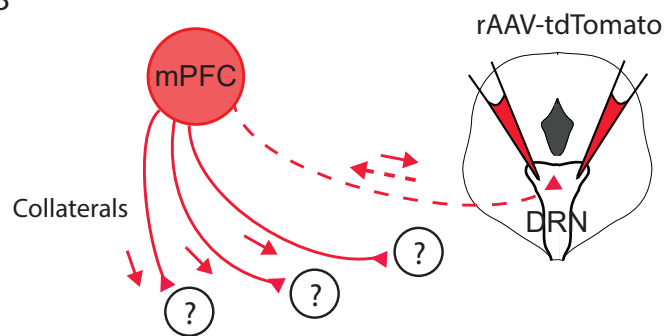

C

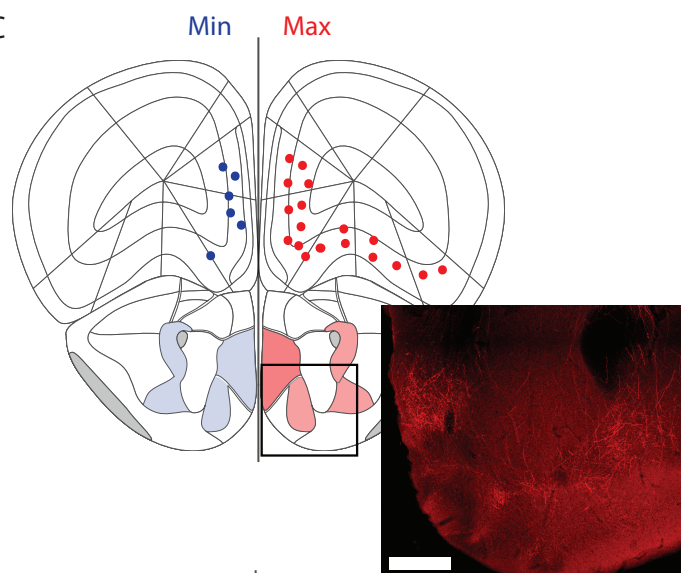

F

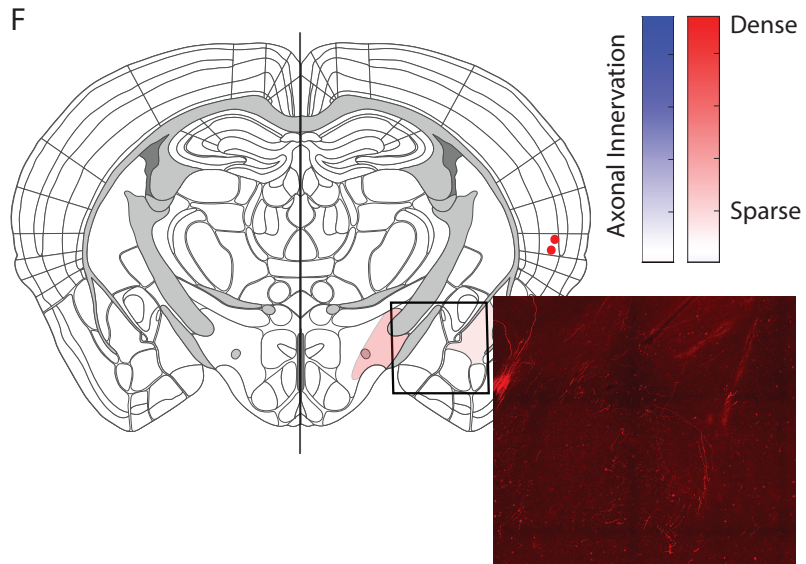

D

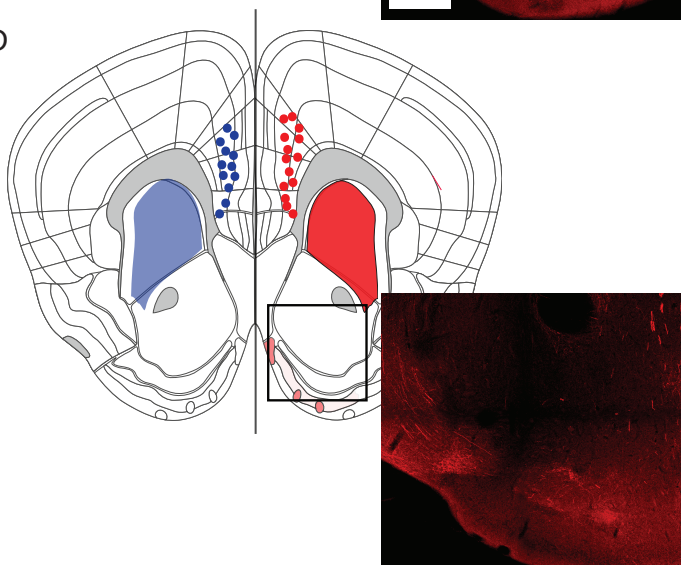

G

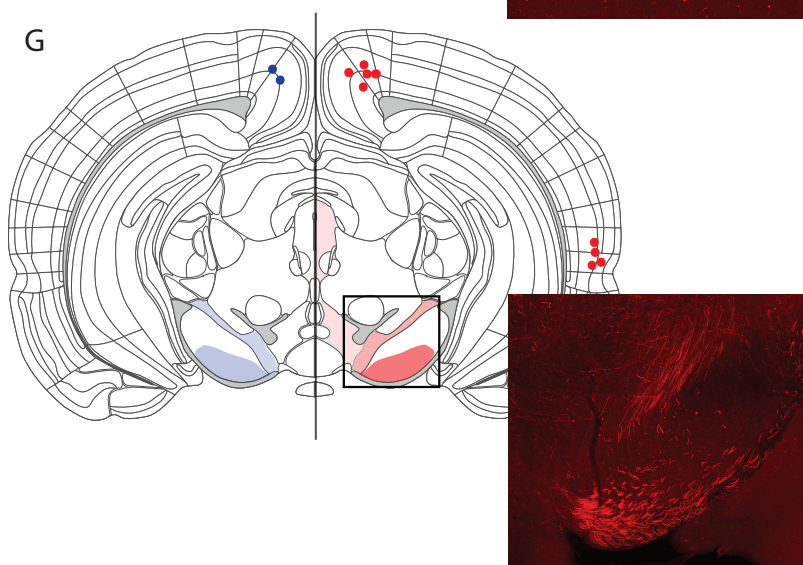

E

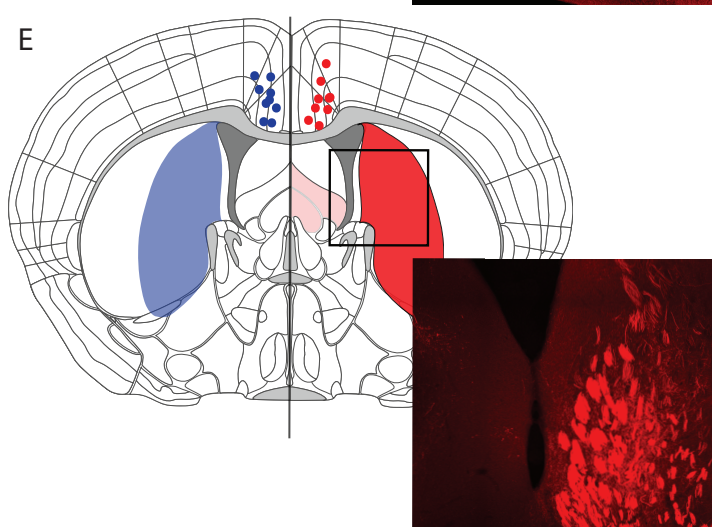

H

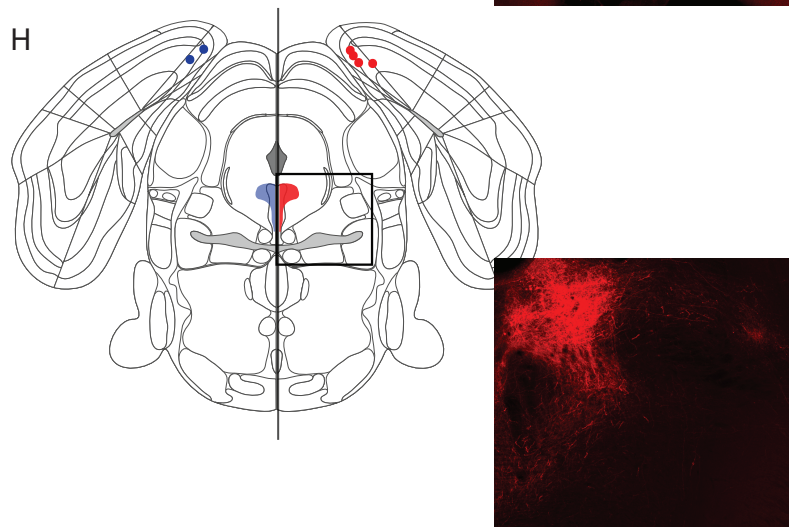

Supplement: supp [file elife_poa_e93485_Figure_3_figure_supplement_3.pdf › elife_poa_e93485_Figure_3_figure_supplement_3.pdf]
